# Supplementary material for: Morpholino-driven transcriptional blockade of Dkk-1 in experimental osteosarcoma inhibits bone damage and tumor expansion by multiple mechanisms.
Source: Research Square preprint supplement (doi:10.21203/rs.3.rs-677459/v1), 2021-07-14
Supplement: Supplementary file 1 [file 60ac8bed216f6daeb2495515.xlsx]

## Sheet: Sup.Table 1 A logphase DEgene
mgi_symbol	ensembl_gene_id	gene_biotype	entrezgene_id	baseMean.x	log2FoldChange.x	lfcSE.x	stat.x	pvalue.x	padj.x
Smim41	ENSMUSG00000075408	protein_coding	NA	27.4922	2.8643	0.432607	6.62101	3.56743e-11	4.44913e-09
NA	NA	NA	NA	78.0123	2.73128	0.291142	9.38126	6.51901e-21	3.84082e-18
mt-Tf	ENSMUSG00000064336	Mt_tRNA	NA	102.011	2.6031	0.45972	5.66237	1.49297e-08	1.01629e-06
Serpinb9e	ENSMUSG00000062342	protein_coding	20710	135.156	2.50457	0.315898	7.9284	2.21984e-15	6.02034e-13
Serpinb9g	ENSMUSG00000057726	protein_coding	93806	61.6709	2.41006	0.370772	6.50011	8.02601e-11	9.39263e-09
NA	NA	NA	NA	51.0554	2.35925	0.470647	5.01278	5.36493e-07	2.18771e-05
Sprr1a	ENSMUSG00000050359	protein_coding	NA	26.2863	2.30033	0.469675	4.89771	9.69623e-07	3.66526e-05
Cd200r4	ENSMUSG00000062082	protein_coding	239849	40.5453	2.2333	0.455819	4.89955	9.60585e-07	3.63915e-05
mt-Tm	ENSMUSG00000064344	Mt_tRNA	NA	716.666	2.15896	0.167077	12.922	3.38323e-38	9.63431e-35
Cacng7	ENSMUSG00000069806	protein_coding	81904	28.4501	2.07576	0.586339	3.54019	0.000399833	0.00593993
Txnip	ENSMUSG00000038393	protein_coding	56338	823.786	2.0519	0.51783	3.96249	7.41714e-05	0.00152319
Gm15441	ENSMUSG00000074398	antisense	NA	231.348	2.0314	0.459147	4.4243	9.6756e-06	0.000269247
Serpinb9f	ENSMUSG00000038327	protein_coding	20709	44.0679	2.02386	0.493871	4.09795	4.16826e-05	0.000944548
Ppbp	ENSMUSG00000029372	protein_coding	NA	73.304	1.9208	0.692195	2.77494	0.00552112	0.0457301
mt-Tt	ENSMUSG00000064371	Mt_tRNA	NA	1497.67	1.84574	0.132831	13.8954	6.75609e-44	1.15435e-39
Tmem132b	ENSMUSG00000070498	protein_coding	208151	75.835	1.81707	0.346043	5.251	1.51272e-07	7.51347e-06
NA	NA	NA	NA	44.8191	1.80807	0.245676	7.35955	1.84533e-13	3.4271e-11
Acta2	ENSMUSG00000035783	protein_coding	11475	832.37	1.77836	0.288471	6.16477	7.05841e-10	6.28125e-08
mt-Tv	ENSMUSG00000064338	Mt_tRNA	NA	135.946	1.76322	0.26755	6.59027	4.39035e-11	5.39666e-09
Epm2a	ENSMUSG00000055493	protein_coding	13853	59.3437	1.73158	0.402032	4.30708	1.65425e-05	0.000432624
Jph2	ENSMUSG00000017817	protein_coding	59091	91.9128	1.688	0.273574	6.17018	6.82132e-10	6.10204e-08
Tmem45a	ENSMUSG00000022754	protein_coding	56277	371.39	1.66286	0.309555	5.37176	7.79701e-08	4.36786e-06
Lcp1	ENSMUSG00000021998	protein_coding	18826	77.7964	1.61424	0.207368	7.78443	7.00295e-15	1.78586e-12
Krt7	ENSMUSG00000023039	protein_coding	NA	16.3478	1.59367	0.411563	3.87223	0.000107844	0.00204743
NA	NA	NA	NA	5660.48	1.52177	0.117024	13.0039	1.16316e-38	3.97477e-35
NA	NA	NA	NA	5664.24	1.52171	0.117	13.006	1.13059e-38	3.97477e-35
NA	NA	NA	NA	58.2983	1.47021	0.492334	2.9862	0.00282469	0.0277851
Acp5	ENSMUSG00000001348	protein_coding	NA	13.0099	1.44587	0.477346	3.02898	0.00245382	0.0250763
Gipr	ENSMUSG00000030406	protein_coding	NA	31.9535	1.44236	0.293682	4.91128	9.04853e-07	3.45868e-05
Ecm2	ENSMUSG00000043631	protein_coding	407800	50.6846	1.43484	0.274978	5.21803	1.8084e-07	8.6793e-06
Lmod1	ENSMUSG00000048096	protein_coding	93689	40.7301	1.41696	0.325029	4.3595	1.30357e-05	0.00034747
NA	NA	NA	NA	62.387	1.39343	0.269939	5.16204	2.44279e-07	1.10303e-05
NA	NA	NA	NA	522.761	1.34238	0.323291	4.15223	3.29245e-05	0.000778076
Actg2	ENSMUSG00000059430	protein_coding	11468	182.976	1.34015	0.154095	8.69695	3.4091e-18	1.4562e-15
Cbr2	ENSMUSG00000025150	protein_coding	NA	952.524	1.33215	0.341414	3.90187	9.54537e-05	0.00186411
NA	NA	NA	NA	12.7208	1.30169	0.400223	3.25242	0.00114428	0.0138917
NA	NA	NA	NA	17.5739	1.26231	0.340455	3.70772	0.000209134	0.00348317
Cdcp1	ENSMUSG00000035498	protein_coding	109332	59.732	1.24958	0.272779	4.58093	4.62911e-06	0.000143838
Mgarp	ENSMUSG00000037161	protein_coding	NA	85.3109	1.22835	0.338516	3.62862	0.000284938	0.00452039
Hmcn2	ENSMUSG00000055632	protein_coding	665700	119.144	1.21471	0.189376	6.41428	1.41493e-10	1.53984e-08
Ass1	ENSMUSG00000076441	protein_coding	11898	143.576	1.19318	0.189344	6.30164	2.94513e-10	2.83522e-08
Ccl9	ENSMUSG00000019122	protein_coding	NA	221.403	1.18897	0.210527	5.64757	1.62736e-08	1.08614e-06
Lag3	ENSMUSG00000030124	protein_coding	16768	52.5942	1.18104	0.330679	3.57156	0.00035486	0.00537989
Car9	ENSMUSG00000028463	protein_coding	NA	124.717	1.16021	0.169384	6.84958	7.40664e-12	1.06344e-09
NA	NA	NA	NA	63.766	1.13621	0.410448	2.76822	0.0056363	0.0464105
Gm20324	ENSMUSG00000100199	antisense	NA	28.6748	1.12853	0.30904	3.65174	0.000260467	0.00418265
3830417A13Rik	ENSMUSG00000031179	protein_coding	NA	157.404	1.12418	0.138394	8.12302	4.54706e-16	1.363e-13
Gm36099	ENSMUSG00000113726	antisense	NA	38.8138	1.12326	0.284023	3.9548	7.65981e-05	0.0015599
Akr1c14	ENSMUSG00000033715	protein_coding	105387	177.989	1.12216	0.250128	4.48635	7.24531e-06	0.000209819
Cxcl1	ENSMUSG00000029380	protein_coding	NA	12931.3	1.11784	0.200652	5.57105	2.53203e-08	1.59639e-06
Atp2b4	ENSMUSG00000026463	protein_coding	381290	243.415	1.11106	0.327829	3.38915	0.000701085	0.00938772
Ptx3	ENSMUSG00000027832	protein_coding	NA	277.65	1.0896	0.162409	6.70899	1.95971e-11	2.59562e-09
Ero1l	ENSMUSG00000021831	protein_coding	50527	9116.16	1.0834	0.307943	3.51818	0.000434511	0.00633452
Gm8332	ENSMUSG00000095799	protein_coding	NA	19.2009	1.07878	0.367389	2.93634	0.0033211	0.0313504
Arhgap9	ENSMUSG00000040345	protein_coding	216445	28.9164	1.05769	0.293778	3.60032	0.00031783	0.00491888
Ankrd37	ENSMUSG00000050914	protein_coding	654824	393.329	1.05462	0.224168	4.7046	2.54365e-06	8.55526e-05
Ip6k3	ENSMUSG00000024210	protein_coding	271424	19.2943	1.04814	0.333337	3.14439	0.00166431	0.0184765
Pdk1	ENSMUSG00000006494	protein_coding	228026	1195.07	1.04573	0.273966	3.81702	0.000135071	0.0024344
NA	NA	NA	NA	119.788	1.04344	0.239325	4.35992	1.30108e-05	0.00034747
Pex5l	ENSMUSG00000027674	protein_coding	58869	31.8777	1.03737	0.305129	3.39977	0.000674432	0.00908069
Insyn1	ENSMUSG00000066607	protein_coding	NA	135.048	1.03704	0.163149	6.3564	2.06539e-10	2.03985e-08
Igfbp7	ENSMUSG00000036256	protein_coding	29817	1242.2	1.01356	0.236764	4.28087	1.86162e-05	0.000480477
Erfe	ENSMUSG00000047443	protein_coding	NA	28.3427	1.01128	0.336228	3.00772	0.00263211	0.0264232
Col12a1	ENSMUSG00000032332	protein_coding	12816	736.645	1.00873	0.358091	2.81696	0.0048481	0.0417513
Lncenc1	ENSMUSG00000078952	lincRNA	NA	34.6232	1.00108	0.284734	3.51584	0.000438359	0.00635806
NA	NA	NA	NA	889.201	1.00058	0.136482	7.3312	2.28094e-13	4.14597e-11
Ldha-ps2	ENSMUSG00000083836	processed_pseudogene	NA	128.534	0.999864	0.199427	5.01369	5.33964e-07	2.18261e-05
Hr	ENSMUSG00000022096	protein_coding	NA	44.8549	0.987159	0.241613	4.0857	4.39433e-05	0.000987916
Serpinb9b	ENSMUSG00000021403	protein_coding	20706	156.275	0.987056	0.142331	6.93492	4.06462e-12	6.09194e-10
NA	NA	NA	NA	217.559	0.975481	0.153071	6.37273	1.8569e-10	1.93457e-08
Pdk4	ENSMUSG00000019577	protein_coding	27273	967.233	0.974971	0.119294	8.17281	3.0128e-16	9.53274e-14
Gm42788	ENSMUSG00000107388	lincRNA	NA	31.9995	0.973908	0.258172	3.77232	0.000161734	0.00280548
Klf5	ENSMUSG00000005148	protein_coding	NA	778.305	0.973437	0.101215	9.61747	6.74678e-22	4.61102e-19
Gm5424	ENSMUSG00000046687	processed_pseudogene	NA	83.2098	0.96846	0.171237	5.65567	1.55242e-08	1.04018e-06
NA	NA	NA	NA	174.219	0.958175	0.182259	5.25723	1.46242e-07	7.34909e-06
Vwf	ENSMUSG00000001930	protein_coding	22371	655.125	0.950645	0.250481	3.79528	0.000147476	0.00260307
Thbs1	ENSMUSG00000040152	protein_coding	21825	12091.1	0.948275	0.197426	4.80318	1.56162e-06	5.65295e-05
Id3	ENSMUSG00000007872	protein_coding	NA	383.753	0.933031	0.317205	2.94141	0.0032672	0.0310087
Necab3	ENSMUSG00000027489	protein_coding	56846	70.3888	0.923158	0.205593	4.49022	7.11504e-06	0.0002071
Gm11836	ENSMUSG00000081239	processed_pseudogene	NA	21.1221	0.918339	0.317863	2.8891	0.00386348	0.0352249
P4ha3	ENSMUSG00000051048	protein_coding	320452	126.917	0.916815	0.283542	3.23344	0.00122309	0.0146446
Akr1c12	ENSMUSG00000021211	protein_coding	NA	42.5282	0.914197	0.263797	3.46553	0.000529193	0.00741131
NA	NA	NA	NA	115.372	0.912969	0.180923	5.04616	4.50774e-07	1.86487e-05
Akp-ps1	ENSMUSG00000101940	transcribed_unprocessed_pseudogene	NA	27.4968	0.910566	0.325528	2.7972	0.00515479	0.0435798
Gm29233	ENSMUSG00000101859	lincRNA	NA	855.111	0.908445	0.178111	5.10044	3.38859e-07	1.46206e-05
Slc39a4	ENSMUSG00000063354	protein_coding	72027	130.153	0.904851	0.205994	4.39261	1.11998e-05	0.00030716
Pfkl	ENSMUSG00000020277	protein_coding	NA	4107.16	0.898147	0.227427	3.94917	7.84238e-05	0.00158199
Fbxl18	ENSMUSG00000066640	protein_coding	231863	1794.62	0.888647	0.0823815	10.787	3.96644e-27	5.64755e-24
mt-Rnr2	ENSMUSG00000064339	Mt_rRNA	NA	88198.2	0.877665	0.113827	7.71051	1.25315e-14	2.97379e-12
NA	NA	NA	NA	280.865	0.876698	0.141533	6.19428	5.85507e-10	5.37848e-08
Gm43860	ENSMUSG00000106928	TEC	NA	90.8726	0.875348	0.251231	3.48423	0.000493548	0.00699838
Egln1	ENSMUSG00000031987	protein_coding	NA	2252.4	0.863783	0.23464	3.68131	0.00023204	0.00380118
Tmsb4x	ENSMUSG00000049775	protein_coding	NA	6971.55	0.862409	0.0868939	9.92486	3.24555e-23	2.64064e-20
Aldoc	ENSMUSG00000017390	protein_coding	NA	27.8074	0.859975	0.296204	2.90332	0.00369227	0.0340637
Gm11517	ENSMUSG00000081249	processed_pseudogene	NA	108.104	0.859776	0.254483	3.37852	0.000728772	0.00963016
Acvrl1	ENSMUSG00000000530	protein_coding	11482	48.7905	0.858018	0.242988	3.53111	0.00041382	0.00607956
Klf10	ENSMUSG00000037465	protein_coding	NA	1795.44	0.854485	0.160333	5.32944	9.8515e-08	5.22742e-06
Cd68	ENSMUSG00000018774	protein_coding	NA	1088.28	0.84381	0.0917194	9.1999	3.58278e-20	1.91298e-17
Ces1g	ENSMUSG00000057074	protein_coding	12623	105.619	0.842574	0.283966	2.96717	0.00300555	0.0291249
P4ha2	ENSMUSG00000018906	protein_coding	18452	3415.17	0.841798	0.172535	4.87899	1.06629e-06	4.00409e-05
Map2	ENSMUSG00000015222	protein_coding	17756	42.6662	0.835397	0.288347	2.89719	0.00376522	0.0345502
Glt8d2	ENSMUSG00000020251	protein_coding	74782	87.7537	0.834566	0.209548	3.9827	6.81362e-05	0.00142494
Pde8a	ENSMUSG00000025584	protein_coding	18584	36.1129	0.834037	0.300104	2.77916	0.00544993	0.0453347
Sema3e	ENSMUSG00000063531	protein_coding	20349	321.577	0.818758	0.122487	6.68443	2.31825e-11	3.03574e-09
Pfkp	ENSMUSG00000021196	protein_coding	56421	1925.08	0.814623	0.107947	7.5465	4.47122e-14	9.31649e-12
Nanos1	ENSMUSG00000072437	protein_coding	NA	223.975	0.814219	0.114199	7.12982	1.005e-12	1.68348e-10
Pgam1	ENSMUSG00000011752	protein_coding	18648	7713.74	0.810427	0.127348	6.36387	1.96738e-10	1.99848e-08
Afp	ENSMUSG00000054932	protein_coding	NA	116.909	0.807613	0.201075	4.01647	5.90756e-05	0.00127445
Armcx4	ENSMUSG00000049804	protein_coding	NA	109.872	0.794535	0.153739	5.16806	2.36531e-07	1.07483e-05
Sema3c	ENSMUSG00000028780	protein_coding	20348	1360.61	0.792034	0.173808	4.55694	5.19053e-06	0.000157803
Serpina1d	ENSMUSG00000071177	protein_coding	20703	1097.03	0.789937	0.119182	6.62798	3.40322e-11	4.27554e-09
Gm44238	ENSMUSG00000107730	lincRNA	NA	43.5528	0.785777	0.257278	3.05419	0.00225669	0.0234822
Rtbdn	ENSMUSG00000048617	protein_coding	234542	88.0011	0.777686	0.213456	3.64331	0.000269153	0.0042979
Pcolce2	ENSMUSG00000015354	protein_coding	76477	117.594	0.775957	0.150399	5.15932	2.47852e-07	1.11442e-05
Siglecg	ENSMUSG00000030468	protein_coding	243958	519.457	0.775335	0.130049	5.96186	2.4938e-09	2.02901e-07
Lamb3	ENSMUSG00000026639	protein_coding	16780	99.6808	0.77266	0.201566	3.83329	0.00012644	0.00232797
C78283	ENSMUSG00000106968	lincRNA	NA	47.1715	0.771918	0.229127	3.36896	0.000754524	0.00985611
NA	NA	NA	NA	40.8103	0.76886	0.209179	3.67561	0.00023728	0.00387217
Arhgap29	ENSMUSG00000039831	protein_coding	214137	387.85	0.767582	0.166896	4.59917	4.24179e-06	0.000132738
Lyz2	ENSMUSG00000069516	protein_coding	NA	166.502	0.766048	0.14332	5.34503	9.04005e-08	4.85718e-06
Papss2	ENSMUSG00000024899	protein_coding	23972	112.819	0.760545	0.143016	5.31792	1.04961e-07	5.51802e-06
Pla1a	ENSMUSG00000002847	protein_coding	85031	133.652	0.758759	0.184037	4.12287	3.74183e-05	0.000862792
Serpinb8	ENSMUSG00000026315	protein_coding	20725	166.997	0.756712	0.231823	3.26418	0.00109782	0.0134848
Gm36543	ENSMUSG00000112803	lincRNA	NA	36.8114	0.755292	0.262113	2.88155	0.00395725	0.0359264
Gm35330	ENSMUSG00000114053	lincRNA	NA	293.91	0.747637	0.106639	7.01089	2.36799e-12	3.71188e-10
Nckap1l	ENSMUSG00000022488	protein_coding	105855	62.8399	0.744084	0.230397	3.22958	0.00123974	0.0148127
Gm7665	ENSMUSG00000063628	processed_pseudogene	NA	214.26	0.742717	0.196107	3.7873	0.000152295	0.00267707
Gm30835	ENSMUSG00000105068	lincRNA	NA	82.232	0.741067	0.216958	3.41572	0.000636128	0.00866738
Gm11110	ENSMUSG00000079414	lincRNA	NA	211.896	0.736153	0.145461	5.06083	4.17432e-07	1.7481e-05
Gm34256	ENSMUSG00000116793	lincRNA	NA	220.172	0.730014	0.120124	6.07716	1.22328e-09	1.03985e-07
Chrnb1	ENSMUSG00000041189	protein_coding	11443	587.956	0.72894	0.113994	6.39453	1.61039e-10	1.71969e-08
S100a11	ENSMUSG00000027907	protein_coding	20195	6497.44	0.727756	0.135361	5.37642	7.59829e-08	4.27054e-06
Adam19	ENSMUSG00000011256	protein_coding	11492	366.142	0.71489	0.138498	5.16173	2.44674e-07	1.10303e-05
Havcr2	ENSMUSG00000020399	protein_coding	171285	518.876	0.713587	0.115359	6.18581	6.17832e-10	5.61364e-08
Gas2l3	ENSMUSG00000074802	protein_coding	237436	635.891	0.71296	0.156257	4.56274	5.04894e-06	0.000154877
Nfkbia	ENSMUSG00000021025	protein_coding	NA	3191.16	0.712006	0.149534	4.76151	1.92149e-06	6.76919e-05
Vgll3	ENSMUSG00000091243	protein_coding	73569	1455.69	0.711414	0.111103	6.40318	1.52173e-10	1.64558e-08
Ccl2	ENSMUSG00000035385	protein_coding	NA	9298.12	0.70847	0.143643	4.93216	8.13245e-07	3.17123e-05
NA	NA	NA	NA	536.181	0.705678	0.200806	3.51423	0.000441035	0.00638063
Aif1l	ENSMUSG00000001864	protein_coding	108897	102.159	0.698819	0.171368	4.07788	4.54475e-05	0.00101505
NA	NA	NA	NA	266.423	0.69846	0.130449	5.35426	8.59081e-08	4.73488e-06
Kdm3a	ENSMUSG00000053470	protein_coding	104263	4912.2	0.693781	0.137672	5.03936	4.67082e-07	1.92303e-05
Srpx2	ENSMUSG00000031253	protein_coding	NA	44.6453	0.693042	0.212086	3.26774	0.0010841	0.0133643
4933430L12Rik	ENSMUSG00000108523	antisense	NA	132.973	0.690062	0.242321	2.84772	0.00440334	0.0387412
Stx11	ENSMUSG00000039232	protein_coding	74732	588.075	0.687587	0.096964	7.09116	1.32992e-12	2.14368e-10
NA	NA	NA	NA	153.596	0.686268	0.206177	3.32855	0.000873009	0.0110984
Ckb	ENSMUSG00000001270	protein_coding	NA	147.053	0.683133	0.1868	3.65703	0.00025515	0.00411273
Gys1	ENSMUSG00000003865	protein_coding	14936	2353.97	0.682567	0.155333	4.39421	1.11176e-05	0.000305394
G930009F23Rik	ENSMUSG00000115009	lincRNA	NA	445.571	0.680008	0.12874	5.28202	1.27767e-07	6.54119e-06
Mroh6	ENSMUSG00000098678	protein_coding	NA	62.0713	0.676499	0.222951	3.03429	0.00241104	0.0247567
E230032D23Rik	ENSMUSG00000109251	antisense	NA	416.099	0.675442	0.157963	4.27595	1.90323e-05	0.000488145
Serpinb6b	ENSMUSG00000042842	protein_coding	20708	203.037	0.671079	0.129634	5.17673	2.25806e-07	1.03435e-05
Sp8	ENSMUSG00000048562	protein_coding	NA	202.507	0.665246	0.158331	4.20161	2.65019e-05	0.000648853
Pim1	ENSMUSG00000024014	protein_coding	18712	5256.18	0.661614	0.0925805	7.14636	8.91062e-13	1.52247e-10
Gm26885	ENSMUSG00000097125	antisense	NA	1317.74	0.658938	0.103608	6.35994	2.01834e-10	2.01319e-08
Ccdc80	ENSMUSG00000022665	protein_coding	67896	407.52	0.657624	0.173882	3.78202	0.000155564	0.00272053
P4ha1	ENSMUSG00000019916	protein_coding	18451	6797.31	0.654153	0.148101	4.41693	1.00114e-05	0.000277236
Grb14	ENSMUSG00000026888	protein_coding	50915	127.5	0.652151	0.146102	4.46367	8.05683e-06	0.00023067
Cdc42ep3	ENSMUSG00000036533	protein_coding	260409	964.715	0.645724	0.0712574	9.06185	1.28262e-19	6.44556e-17
S100a4	ENSMUSG00000001020	protein_coding	20198	13896.3	0.642612	0.159107	4.03887	5.37085e-05	0.00117198
Aldh3b1	ENSMUSG00000024885	protein_coding	67689	290.875	0.641861	0.115888	5.53862	3.04858e-08	1.86696e-06
Adra1b	ENSMUSG00000050541	protein_coding	11548	109.283	0.641702	0.212302	3.0226	0.00250616	0.0254763
H2-M10.1	ENSMUSG00000024448	protein_coding	NA	412.817	0.633998	0.199632	3.17584	0.00149403	0.0169615
Ephx1	ENSMUSG00000038776	protein_coding	13849	5804.22	0.633255	0.121098	5.22927	1.70177e-07	8.26036e-06
Tpi1	ENSMUSG00000023456	protein_coding	21991	18452.1	0.631522	0.132834	4.75421	1.99222e-06	6.96094e-05
Wdr66	ENSMUSG00000029442	protein_coding	269701	59.2527	0.628373	0.220365	2.85151	0.00435123	0.0384411
Dubr	ENSMUSG00000022639	lincRNA	NA	452.541	0.627943	0.117987	5.32216	1.02544e-07	5.40761e-06
5830408C22Rik	ENSMUSG00000110148	processed_transcript	NA	105.917	0.624681	0.203549	3.06895	0.00214811	0.0225217
Fgf11	ENSMUSG00000042826	protein_coding	NA	136.18	0.624224	0.160758	3.88301	0.00010317	0.00197619
Col11a1	ENSMUSG00000027966	protein_coding	12814	176.533	0.617133	0.221089	2.79134	0.00524909	0.0441368
Gm49528	ENSMUSG00000116439	unprocessed_pseudogene	NA	114.279	0.607043	0.15876	3.82366	0.000131485	0.00238741
Adamts5	ENSMUSG00000022894	protein_coding	23794	360.25	0.605103	0.185726	3.25805	0.00112181	0.013696
Apln	ENSMUSG00000037010	protein_coding	NA	1117.39	0.603116	0.128531	4.69236	2.70069e-06	8.99493e-05
Ripk2	ENSMUSG00000041135	protein_coding	192656	1018.5	0.602176	0.0949672	6.34089	2.28442e-10	2.23037e-08
Tbl2	ENSMUSG00000005374	protein_coding	27368	1098.73	0.601281	0.0995471	6.04016	1.53957e-09	1.29582e-07
Fam241a	ENSMUSG00000050549	protein_coding	70617	86.4034	0.600355	0.191576	3.13377	0.00172576	0.0189379
mt-Rnr1	ENSMUSG00000064337	Mt_rRNA	NA	51825.7	0.593997	0.110636	5.36891	7.92123e-08	4.40854e-06
mt-Tq	ENSMUSG00000064343	Mt_tRNA	NA	38946.9	0.592887	0.0737846	8.03537	9.32941e-16	2.70173e-13
Klhl30	ENSMUSG00000026308	protein_coding	NA	355.351	0.591334	0.169094	3.49707	0.000470394	0.00674823
Gm21691	ENSMUSG00000116840	antisense	NA	99.2637	0.585235	0.167383	3.49639	0.000471607	0.00675429
Gm26716	ENSMUSG00000097224	antisense	NA	259.173	0.582765	0.153816	3.7887	0.000151435	0.00266469
NA	NA	NA	NA	133.656	0.580023	0.15335	3.78235	0.000155352	0.00271962
NA	NA	NA	NA	3807.4	0.579499	0.140194	4.13356	3.57193e-05	0.000829211
Bnip3l	ENSMUSG00000022051	protein_coding	12177	3167.1	0.57651	0.090656	6.35931	2.02662e-10	2.01319e-08
Ptgs2	ENSMUSG00000032487	protein_coding	NA	28781.9	0.575371	0.132933	4.32827	1.50283e-05	0.000396255
NA	NA	NA	NA	264.604	0.571879	0.17858	3.20237	0.00136301	0.0159619
Fkbp7	ENSMUSG00000002732	protein_coding	14231	264.953	0.568899	0.118813	4.78817	1.68305e-06	6.00348e-05
Smtn	ENSMUSG00000020439	protein_coding	29856	2561.67	0.56629	0.122093	4.63818	3.51496e-06	0.000112046
Btg2	ENSMUSG00000020423	protein_coding	12227	799.227	0.565642	0.107541	5.25976	1.44242e-07	7.29149e-06
Wwc1	ENSMUSG00000018849	protein_coding	211652	1495.51	0.560643	0.0821949	6.8209	9.04739e-12	1.2882e-09
Pou2f2	ENSMUSG00000008496	protein_coding	18987	246.267	0.559443	0.107997	5.18015	2.21704e-07	1.02909e-05
Pde4b	ENSMUSG00000028525	protein_coding	18578	367.382	0.559417	0.171845	3.25536	0.0011325	0.0137919
Tbc1d2	ENSMUSG00000039813	protein_coding	381605	715.287	0.558745	0.112923	4.94803	7.49687e-07	2.95142e-05
Ccn1	ENSMUSG00000028195	protein_coding	NA	14568.7	0.555363	0.122518	4.53292	5.81747e-06	0.000173309
Fmr1nb	ENSMUSG00000062170	protein_coding	NA	57.7618	0.554769	0.192451	2.88265	0.0039434	0.0358388
Stk17b	ENSMUSG00000026094	protein_coding	98267	2150.16	0.552939	0.109182	5.06436	4.0977e-07	1.72872e-05
Col8a1	ENSMUSG00000068196	protein_coding	12837	4771.52	0.548839	0.104626	5.24571	1.55684e-07	7.67906e-06
Enpp2	ENSMUSG00000022425	protein_coding	18606	1216.39	0.545623	0.115583	4.72061	2.35138e-06	8.01911e-05
NA	NA	NA	NA	1339.18	0.544332	0.100487	5.41696	6.06212e-08	3.5111e-06
NA	NA	NA	NA	1966.83	0.541797	0.117266	4.62024	3.8329e-06	0.000121052
Gask1b	ENSMUSG00000027955	protein_coding	68659	1322.63	0.538814	0.113571	4.74431	2.09218e-06	7.25092e-05
Gm11947	ENSMUSG00000084962	processed_transcript	NA	775.923	0.538065	0.109276	4.92388	8.48428e-07	3.27229e-05
Spidr	ENSMUSG00000041974	protein_coding	224008	981.54	0.536151	0.0781679	6.85896	6.93616e-12	1.00433e-09
Ccnf	ENSMUSG00000072082	protein_coding	12449	1249.22	0.534762	0.164128	3.2582	0.0011212	0.013696
Gm16933	ENSMUSG00000086289	lincRNA	NA	632.688	0.534648	0.153357	3.4863	0.00048975	0.00696162
Col5a2	ENSMUSG00000026042	protein_coding	12832	3874.53	0.532861	0.0923448	5.77035	7.91086e-09	5.65544e-07
Nlrc3	ENSMUSG00000049871	protein_coding	268857	232.915	0.532007	0.142232	3.74041	0.000183719	0.00312964
Denr	ENSMUSG00000023106	protein_coding	68184	4020.03	0.529275	0.10189	5.19456	2.052e-07	9.68521e-06
NA	NA	NA	NA	194.333	0.527896	0.188512	2.80034	0.00510489	0.043265
Amotl2	ENSMUSG00000032531	protein_coding	NA	4880.58	0.5259	0.0809954	6.49296	8.41654e-11	9.71655e-09
Pxdc1	ENSMUSG00000021411	protein_coding	NA	390.507	0.524533	0.119828	4.37739	1.2011e-05	0.000327827
Eno1b	ENSMUSG00000059040	protein_coding	433182	268.734	0.522074	0.132698	3.93431	8.3436e-05	0.00167126
Plod2	ENSMUSG00000032374	protein_coding	26432	4342.51	0.520921	0.150301	3.46584	0.00052857	0.00741131
Crim1	ENSMUSG00000024074	protein_coding	50766	2934.73	0.519314	0.116096	4.47312	7.70862e-06	0.000222107
Tmem266	ENSMUSG00000032313	protein_coding	244886	103.639	0.519268	0.164667	3.15344	0.00161358	0.0180312
Kdelr3	ENSMUSG00000010830	protein_coding	NA	1241.11	0.514648	0.117879	4.36589	1.26604e-05	0.000341731
Slc39a13	ENSMUSG00000002105	protein_coding	NA	2491.04	0.514444	0.104246	4.93489	8.01944e-07	3.13547e-05
NA	NA	NA	NA	601.69	0.514158	0.087812	5.85522	4.76389e-09	3.58572e-07
Rrm2	ENSMUSG00000020649	protein_coding	NA	804.88	0.512075	0.144797	3.53651	0.000405449	0.0059823
Gm17501	ENSMUSG00000097183	lincRNA	NA	218.715	0.511853	0.172855	2.96116	0.00306478	0.0295847
Slc17a9	ENSMUSG00000023393	protein_coding	228993	99.3043	0.511504	0.166674	3.06889	0.00214857	0.0225217
Mroh2a	ENSMUSG00000079429	protein_coding	100040766	563.977	0.510295	0.107291	4.75616	1.97314e-06	6.90843e-05
C3ar1	ENSMUSG00000040552	protein_coding	12267	293.765	0.510226	0.175616	2.90535	0.00366846	0.0338807
Vegfc	ENSMUSG00000031520	protein_coding	22341	208.055	0.510003	0.129358	3.94258	8.06086e-05	0.00161842
Epb41l4a	ENSMUSG00000024376	protein_coding	13824	1330.53	0.508386	0.0747279	6.80316	1.02348e-11	1.44523e-09
Itgb3bp	ENSMUSG00000028549	protein_coding	67733	674.618	0.508303	0.098153	5.17869	2.23454e-07	1.02909e-05
Tube1	ENSMUSG00000019845	protein_coding	71924	172.72	0.506585	0.135163	3.74797	0.000178273	0.00304597
Ebf1	ENSMUSG00000057098	protein_coding	13591	321.653	0.506464	0.123793	4.09123	4.29098e-05	0.000967225
Ajuba	ENSMUSG00000022178	protein_coding	NA	1512.9	0.506077	0.0714498	7.08297	1.41098e-12	2.25308e-10
Cks2	ENSMUSG00000062248	protein_coding	NA	619.732	0.503084	0.0904984	5.55904	2.71265e-08	1.69155e-06
Gm15452	ENSMUSG00000084353	processed_pseudogene	NA	61.1598	0.502734	0.183149	2.74494	0.00605224	0.0488237
Sdc3	ENSMUSG00000025743	protein_coding	20970	1635.41	0.501758	0.165639	3.02923	0.00245178	0.0250763
NA	NA	NA	NA	148.217	0.501135	0.131722	3.80448	0.000142105	0.00252654
Tmem37	ENSMUSG00000050777	protein_coding	NA	636.647	0.497577	0.12223	4.07083	4.68452e-05	0.00104238
Tmeff2	ENSMUSG00000026109	protein_coding	56363	642.3	0.49725	0.100867	4.92973	8.23414e-07	3.183e-05
Rab3b	ENSMUSG00000003411	protein_coding	69908	502.196	0.487802	0.172552	2.82699	0.00469877	0.0407322
Atp8b3	ENSMUSG00000003341	protein_coding	NA	79.3414	0.483969	0.166975	2.89846	0.00375006	0.0344852
Rsph3b	ENSMUSG00000023806	protein_coding	100037282	308.383	0.476806	0.137698	3.4627	0.000534779	0.00747728
Dglucy	ENSMUSG00000021185	protein_coding	217830	666.776	0.473657	0.0892177	5.30901	1.10225e-07	5.74179e-06
S100a13	ENSMUSG00000042312	protein_coding	20196	608.045	0.473513	0.154656	3.06172	0.00220066	0.0229832
Msrb3	ENSMUSG00000051236	protein_coding	320183	1375.51	0.472914	0.0915013	5.16839	2.36122e-07	1.07483e-05
Gem	ENSMUSG00000028214	protein_coding	14579	103.887	0.471147	0.170255	2.7673	0.00565221	0.0464743
Tubb3	ENSMUSG00000062380	protein_coding	NA	93.9845	0.470398	0.159852	2.94271	0.0032535	0.0309517
Adcy1	ENSMUSG00000020431	protein_coding	432530	8566.37	0.469014	0.0827663	5.66673	1.45547e-08	9.9473e-07
Filip1l	ENSMUSG00000043336	protein_coding	78749	1446.52	0.467651	0.109394	4.27493	1.912e-05	0.000488868
Setd7	ENSMUSG00000037111	protein_coding	73251	2675.32	0.467432	0.109699	4.26106	2.0346e-05	0.000516541
Clybl	ENSMUSG00000025545	protein_coding	69634	192.344	0.465964	0.148522	3.13735	0.00170484	0.0187808
Chst7	ENSMUSG00000037347	protein_coding	NA	134.69	0.465913	0.155324	2.99961	0.00270325	0.0269316
Cdca2	ENSMUSG00000048922	protein_coding	108912	200.889	0.465407	0.167719	2.77492	0.00552155	0.0457301
Lrrc8d	ENSMUSG00000046079	protein_coding	231549	1613.5	0.464938	0.0787806	5.90169	3.59806e-09	2.76921e-07
Pim3	ENSMUSG00000035828	protein_coding	NA	6968.64	0.46466	0.0966368	4.80831	1.52212e-06	5.53338e-05
Ska3	ENSMUSG00000021965	protein_coding	219114	124.359	0.462293	0.160984	2.87167	0.00408314	0.0365498
NA	NA	NA	NA	168.405	0.461083	0.135954	3.39148	0.000695169	0.00933045
Nexn	ENSMUSG00000039103	protein_coding	68810	149.69	0.460457	0.155182	2.96721	0.00300515	0.0291249
Pde4d	ENSMUSG00000021699	protein_coding	238871	268.376	0.459796	0.144292	3.18656	0.00143978	0.0165212
Plekha2	ENSMUSG00000031557	protein_coding	83436	2082.49	0.459467	0.103072	4.45771	8.28391e-06	0.000236687
Dstn	ENSMUSG00000015932	protein_coding	56431	8568.45	0.459024	0.0648594	7.07721	1.47089e-12	2.327e-10
Pmp22	ENSMUSG00000018217	protein_coding	18858	2018.95	0.458613	0.0965653	4.74925	2.04171e-06	7.10483e-05
Bnip3l-ps	ENSMUSG00000073198	transcribed_processed_pseudogene	NA	156.602	0.45861	0.143631	3.19296	0.00140822	0.016379
Syn3	ENSMUSG00000059602	protein_coding	27204	1138.66	0.455574	0.127019	3.58665	0.000334955	0.00513846
NA	NA	NA	NA	178.722	0.454372	0.148197	3.066	0.0021694	0.0226984
Myl6b	ENSMUSG00000039824	protein_coding	NA	11758.2	0.453924	0.122479	3.70615	0.000210436	0.00349148
H1f2	ENSMUSG00000036181	protein_coding	50708	1781.86	0.448556	0.127449	3.51949	0.000432374	0.00630875
Radil	ENSMUSG00000029576	protein_coding	231858	270.001	0.447509	0.149064	3.00212	0.00268104	0.0267728
Trnp1	ENSMUSG00000056596	protein_coding	69539	414.104	0.446421	0.104302	4.28008	1.86823e-05	0.000481457
Nox4	ENSMUSG00000030562	protein_coding	50490	422.374	0.445542	0.11956	3.72652	0.00019414	0.00326484
Llgl2	ENSMUSG00000020782	protein_coding	NA	242.877	0.444811	0.135922	3.27255	0.0010658	0.0131682
Pbp2	ENSMUSG00000047104	protein_coding	NA	1079.69	0.444632	0.141021	3.15295	0.00161627	0.0180494
Pgf	ENSMUSG00000004791	protein_coding	18654	392.501	0.442616	0.140669	3.1465	0.00165235	0.0183802
1700086O06Rik	ENSMUSG00000097080	lincRNA	NA	265.887	0.440196	0.106164	4.14637	3.37791e-05	0.000796069
Nrg1	ENSMUSG00000062991	protein_coding	211323	415.4	0.440089	0.109901	4.0044	6.2174e-05	0.00132457
Gm4813	ENSMUSG00000114822	processed_pseudogene	NA	1015.65	0.439795	0.122693	3.5845	0.000337721	0.00516128
Plk2	ENSMUSG00000021701	protein_coding	NA	24428.5	0.439543	0.0867502	5.06676	4.0464e-07	1.71131e-05
Snora44	ENSMUSG00000064604	snoRNA	NA	7139.72	0.439267	0.116003	3.78669	0.000152668	0.00268088
Tbc1d23	ENSMUSG00000022749	protein_coding	67581	1407.49	0.437719	0.082068	5.33362	9.62765e-08	5.12455e-06
Tfec	ENSMUSG00000029553	protein_coding	21426	1205.5	0.436228	0.0737227	5.91715	3.27576e-09	2.55569e-07
Cryab	ENSMUSG00000032060	protein_coding	NA	6105.83	0.434602	0.133783	3.24856	0.0011599	0.0140479
Ccne2	ENSMUSG00000028212	protein_coding	12448	606.819	0.433557	0.115204	3.76339	0.000167624	0.0028988
Fgd3	ENSMUSG00000037946	protein_coding	30938	1303.22	0.433031	0.0662752	6.53384	6.41043e-11	7.71328e-09
Agbl5	ENSMUSG00000029165	protein_coding	231093	1936.05	0.432565	0.106261	4.07079	4.6854e-05	0.00104238
Loxl4	ENSMUSG00000025185	protein_coding	67573	1104.37	0.432143	0.110147	3.92333	8.73331e-05	0.00174116
Scarb1	ENSMUSG00000037936	protein_coding	20778	2575.2	0.430356	0.102483	4.1993	2.6774e-05	0.00065445
Me3	ENSMUSG00000030621	protein_coding	109264	193.692	0.429507	0.120703	3.55838	0.000373148	0.00561233
Pak3	ENSMUSG00000031284	protein_coding	NA	256.285	0.427193	0.155515	2.74695	0.00601519	0.0486166
Ost4	ENSMUSG00000038803	protein_coding	NA	2185.09	0.426884	0.116149	3.6753	0.000237567	0.00387316
Ccl7	ENSMUSG00000035373	protein_coding	NA	5964.32	0.42493	0.128612	3.30396	0.000953278	0.0119762
Pcx	ENSMUSG00000024892	protein_coding	18563	869.66	0.422928	0.0861439	4.90955	9.12851e-07	3.48147e-05
Gm20544	ENSMUSG00000092569	processed_transcript	NA	629.567	0.418198	0.0815316	5.12928	2.9086e-07	1.26776e-05
Pparg	ENSMUSG00000000440	protein_coding	19016	595.484	0.416993	0.103943	4.01175	6.02715e-05	0.00129047
Pdk3	ENSMUSG00000035232	protein_coding	NA	813.94	0.416772	0.086247	4.8323	1.34963e-06	4.94843e-05
Hes1	ENSMUSG00000022528	protein_coding	NA	297.623	0.416097	0.118293	3.51752	0.000435593	0.00633822
Fermt2	ENSMUSG00000037712	protein_coding	218952	2482.98	0.415529	0.0800056	5.19375	2.06097e-07	9.69354e-06
BC028528	ENSMUSG00000038543	protein_coding	NA	114.217	0.41138	0.15026	2.73778	0.00618556	0.0496772
Zdhhc9	ENSMUSG00000036985	protein_coding	NA	1132.15	0.408261	0.0766353	5.32733	9.96678e-08	5.27221e-06
NA	NA	NA	NA	208.378	0.407275	0.123235	3.30487	0.000950205	0.0119464
Gm10252	ENSMUSG00000110350	TEC	NA	161000	0.407032	0.106433	3.82431	0.000131137	0.00238615
9430018G01Rik	ENSMUSG00000107709	antisense	NA	206.984	0.406128	0.133174	3.0496	0.00229147	0.0238007
Gtse1	ENSMUSG00000022385	protein_coding	NA	684.435	0.403415	0.0748212	5.39173	6.97836e-08	4.00108e-06
Pyroxd2	ENSMUSG00000060224	protein_coding	74580	2914.33	0.401894	0.0689944	5.82502	5.71069e-09	4.18768e-07
Gm9747	ENSMUSG00000022591	protein_coding	NA	2331.91	0.397766	0.064161	6.1995	5.66421e-10	5.23128e-08
Bax	ENSMUSG00000003873	protein_coding	12028	167432	0.39679	0.105629	3.75645	0.00017234	0.00296238
Epdr1	ENSMUSG00000002808	protein_coding	NA	460.435	0.39671	0.101211	3.91965	8.86785e-05	0.00176181
Fam111a	ENSMUSG00000024691	protein_coding	107373	914.69	0.396395	0.115924	3.41942	0.000627538	0.00857084
Tiparp	ENSMUSG00000034640	protein_coding	99929	8077.77	0.396307	0.107945	3.67136	0.000241259	0.00392941
Gm44950	ENSMUSG00000108350	TEC	NA	174.168	0.394531	0.117095	3.36933	0.000753522	0.00985611
Gm38124	ENSMUSG00000103082	TEC	NA	205.385	0.393182	0.129753	3.03023	0.00244365	0.0250463
Mis18a	ENSMUSG00000022978	protein_coding	NA	173.878	0.392429	0.133429	2.94111	0.00327043	0.0310087
Ccdc58	ENSMUSG00000075229	protein_coding	381045	1124.72	0.39222	0.0844114	4.64653	3.3756e-06	0.000108617
Angptl4	ENSMUSG00000002289	protein_coding	NA	610.163	0.391788	0.134044	2.92284	0.00346855	0.0324199
Sulf2	ENSMUSG00000006800	protein_coding	72043	2719.94	0.390838	0.119303	3.27601	0.00105285	0.0130449
Hbegf	ENSMUSG00000024486	protein_coding	15200	1023.23	0.388813	0.112737	3.44886	0.000562954	0.00780732
Dhrs9	ENSMUSG00000027068	protein_coding	241452	325.558	0.388726	0.139522	2.78613	0.00533416	0.0446762
Glipr1	ENSMUSG00000056888	protein_coding	73690	10080.4	0.386468	0.0730981	5.28698	1.24354e-07	6.41785e-06
Gmnn	ENSMUSG00000006715	protein_coding	57441	399.65	0.385881	0.097464	3.95921	7.51973e-05	0.00153687
Lpin3	ENSMUSG00000027412	protein_coding	64899	3354.92	0.384549	0.101313	3.79566	0.000147254	0.00260184
NA	NA	NA	NA	3585.55	0.384166	0.0773354	4.96753	6.78123e-07	2.70164e-05
Pde1b	ENSMUSG00000022489	protein_coding	18574	248.717	0.383998	0.122122	3.14437	0.00166445	0.0184765
S100a6	ENSMUSG00000001025	protein_coding	20200	12585.7	0.38395	0.116483	3.2962	0.00098002	0.0122492
Hk1	ENSMUSG00000037012	protein_coding	15275	3780.17	0.383526	0.115247	3.32788	0.000875109	0.0111168
Oga	ENSMUSG00000025220	protein_coding	76055	9387.2	0.380797	0.0751019	5.0704	3.96971e-07	1.68304e-05
Gm10156	ENSMUSG00000066245	processed_pseudogene	NA	356.125	0.380452	0.13187	2.88506	0.00391338	0.0356228
Zfp948	ENSMUSG00000067931	protein_coding	381066	880.273	0.38009	0.0874494	4.3464	1.38391e-05	0.000367165
Endod1	ENSMUSG00000037419	protein_coding	71946	182.324	0.377501	0.128969	2.92706	0.00342179	0.0321235
Fbxo32	ENSMUSG00000022358	protein_coding	67731	4363.52	0.376931	0.112002	3.36538	0.000764377	0.00996958
Timp3	ENSMUSG00000020044	protein_coding	21859	2386.56	0.375921	0.100249	3.74986	0.000176931	0.00302607
Gltp	ENSMUSG00000011884	protein_coding	56356	925.055	0.375792	0.0924703	4.06392	4.82551e-05	0.0010657
Hrob	ENSMUSG00000034773	protein_coding	217216	262.721	0.370573	0.123723	2.99518	0.00274285	0.0272151
Chtf18	ENSMUSG00000019214	protein_coding	NA	247.132	0.370139	0.129746	2.85281	0.00433351	0.0383242
Tpd52l1	ENSMUSG00000000296	protein_coding	21987	1939.7	0.370073	0.0777406	4.76036	1.93247e-06	6.79386e-05
Gm15491	ENSMUSG00000087367	antisense	NA	2198.37	0.369762	0.0597107	6.19257	5.91928e-10	5.40838e-08
Abcb10	ENSMUSG00000031974	protein_coding	56199	912.236	0.369074	0.0713176	5.17507	2.27826e-07	1.04081e-05
Zfp54	ENSMUSG00000023882	protein_coding	NA	197.811	0.368264	0.125185	2.94177	0.00326346	0.0309948
Tnfrsf22	ENSMUSG00000010751	protein_coding	79202	6096.73	0.365904	0.0689754	5.30484	1.12772e-07	5.85661e-06
Cebpd	ENSMUSG00000071637	protein_coding	NA	656.797	0.365634	0.126321	2.89447	0.003798	0.0347391
Fez2	ENSMUSG00000056121	protein_coding	225020	3262.52	0.365018	0.0570147	6.40217	1.53185e-10	1.64611e-08
Acsl5	ENSMUSG00000024981	protein_coding	433256	1777.04	0.364789	0.0561475	6.49697	8.19528e-11	9.52548e-09
Sbsn	ENSMUSG00000046056	protein_coding	282619	1279.54	0.363451	0.0781708	4.64944	3.32832e-06	0.0001075
Dedd2	ENSMUSG00000054499	protein_coding	67379	2219.87	0.362291	0.102414	3.53751	0.000403922	0.00597007
Kctd9	ENSMUSG00000034327	protein_coding	105440	448.753	0.360995	0.110246	3.27445	0.00105869	0.0131078
Cenph	ENSMUSG00000045273	protein_coding	NA	208.478	0.359883	0.126079	2.85443	0.00431136	0.0381876
Cyp2j6	ENSMUSG00000052914	protein_coding	13110	283.876	0.359851	0.120986	2.97433	0.00293628	0.0286681
Bmper	ENSMUSG00000031963	protein_coding	73230	366.169	0.358887	0.104462	3.43558	0.000591276	0.00812755
Zwilch	ENSMUSG00000032400	protein_coding	68014	516.747	0.358182	0.119659	2.99335	0.00275936	0.0273313
Ampd3	ENSMUSG00000005686	protein_coding	11717	6796.13	0.357607	0.111022	3.22105	0.00127721	0.0151545
Styk1	ENSMUSG00000032899	protein_coding	243659	2317.51	0.354852	0.0739683	4.79736	1.60773e-06	5.7953e-05
Dnajb1	ENSMUSG00000005483	protein_coding	NA	9986.51	0.353597	0.128647	2.74858	0.00598543	0.0484448
Zfp52	ENSMUSG00000051341	protein_coding	NA	1487.71	0.353375	0.0975972	3.62075	0.000293749	0.00461322
NA	NA	NA	NA	308.523	0.3532	0.113174	3.12085	0.00180328	0.0195601
Msln	ENSMUSG00000063011	protein_coding	NA	358.857	0.352915	0.113364	3.1131	0.00185132	0.0200327
Arhgap31	ENSMUSG00000022799	protein_coding	12549	959.279	0.352157	0.128633	2.7377	0.00618712	0.0496772
Magea2	ENSMUSG00000055746	protein_coding	NA	327.887	0.35194	0.104066	3.38189	0.000719881	0.00955517
Rusc2	ENSMUSG00000035969	protein_coding	100213	11292.8	0.35102	0.0771443	4.55018	5.36012e-06	0.000162094
Lgr4	ENSMUSG00000050199	protein_coding	107515	552.124	0.3501	0.10773	3.24979	0.0011549	0.0140047
Fosb	ENSMUSG00000003545	protein_coding	NA	1827.68	0.350013	0.122881	2.8484	0.00439403	0.0386792
Sorbs1	ENSMUSG00000025006	protein_coding	20411	1111.87	0.347783	0.100346	3.46585	0.000528567	0.00741131
Nfkbiz	ENSMUSG00000035356	protein_coding	NA	3414.54	0.347332	0.0830002	4.18471	2.85528e-05	0.000689058
Vgll4	ENSMUSG00000030315	protein_coding	232334	1508.98	0.347051	0.0710301	4.88597	1.02921e-06	3.87338e-05
Reep4	ENSMUSG00000033589	protein_coding	NA	681.228	0.345205	0.10126	3.40911	0.000651754	0.00883099
Mad2l1	ENSMUSG00000029910	protein_coding	56150	631.886	0.344652	0.110179	3.12811	0.00175932	0.0192075
Fah	ENSMUSG00000030630	protein_coding	14085	619.984	0.343989	0.121428	2.83287	0.00461315	0.0401734
Ddias	ENSMUSG00000030641	protein_coding	74041	314.89	0.343443	0.110684	3.10292	0.00191622	0.0205656
Rnaseh2c	ENSMUSG00000024925	protein_coding	NA	1210.15	0.339699	0.0978005	3.47338	0.000513944	0.00724525
Fam114a1	ENSMUSG00000029185	protein_coding	68303	2002.61	0.339622	0.0787817	4.31092	1.62578e-05	0.000426045
Chaf1b	ENSMUSG00000022945	protein_coding	110749	380.839	0.339494	0.106146	3.19836	0.00138211	0.0161634
Gm26586	ENSMUSG00000097472	antisense	NA	1116.3	0.339422	0.0977779	3.47136	0.000517828	0.00728798
Hmgn2	ENSMUSG00000003038	protein_coding	15331	651.338	0.339121	0.120876	2.80554	0.00502324	0.0427804
Tmsb10	ENSMUSG00000079523	protein_coding	19240	8041.75	0.336292	0.109713	3.0652	0.00217526	0.0227457
Gsn	ENSMUSG00000026879	protein_coding	227753	5764.45	0.335679	0.094596	3.54855	0.000387352	0.00578018
Habp4	ENSMUSG00000021476	protein_coding	56541	1188.28	0.33518	0.0598829	5.59725	2.17781e-08	1.40566e-06
Ifngr2	ENSMUSG00000022965	protein_coding	NA	1509.57	0.333659	0.0576106	5.79163	6.97058e-09	5.04658e-07
Pcdh10	ENSMUSG00000049100	protein_coding	18526	950.341	0.333309	0.0830219	4.01471	5.95181e-05	0.00127915
Pgbd5	ENSMUSG00000050751	protein_coding	209966	2521.51	0.332565	0.0840366	3.95738	7.57751e-05	0.00154683
Prl2c3	ENSMUSG00000056457	protein_coding	NA	32354.2	0.332045	0.090463	3.67051	0.000242072	0.00393533
Zfp57	ENSMUSG00000036036	protein_coding	NA	1873.5	0.331348	0.10614	3.12181	0.00179745	0.0195239
Gphn	ENSMUSG00000047454	protein_coding	268566	240.706	0.330967	0.105604	3.13404	0.00172417	0.0189326
Capn2	ENSMUSG00000026509	protein_coding	12334	7570.38	0.330515	0.0539284	6.12877	8.85624e-10	7.64231e-08
Irs1	ENSMUSG00000055980	protein_coding	16367	4040.74	0.330239	0.0851372	3.87891	0.000104926	0.00200757
Tyms	ENSMUSG00000025747	protein_coding	22171	451.488	0.330002	0.114766	2.87544	0.00403465	0.0362821
Gm45890	ENSMUSG00000110615	antisense	NA	244.682	0.329997	0.0966258	3.4152	0.000637353	0.00867715
Anxa3	ENSMUSG00000029484	protein_coding	11745	4533.61	0.328833	0.0708128	4.6437	3.42226e-06	0.000109705
Marcks	ENSMUSG00000069662	protein_coding	17118	9266.35	0.328526	0.0918316	3.57748	0.000346919	0.00527354
Prss23	ENSMUSG00000039405	protein_coding	76453	2722.62	0.327941	0.118356	2.77081	0.00559174	0.046088
Cdk1	ENSMUSG00000019942	protein_coding	NA	1367.75	0.327816	0.113776	2.88124	0.00396118	0.0359395
Tstd3	ENSMUSG00000028251	protein_coding	77032	182.071	0.327259	0.108031	3.02931	0.00245112	0.0250763
NA	NA	NA	NA	1585.47	0.327205	0.0582273	5.61944	1.91578e-08	1.25896e-06
Plpp1	ENSMUSG00000021759	protein_coding	19012	892.327	0.326867	0.0856313	3.81714	0.000135008	0.0024344
Ccng1	ENSMUSG00000020326	protein_coding	12450	6766.41	0.325633	0.0784388	4.15143	3.30403e-05	0.000779732
Cnn2	ENSMUSG00000004665	protein_coding	12798	7013.22	0.323536	0.10849	2.98216	0.00286222	0.0280735
Pkia	ENSMUSG00000027499	protein_coding	18767	401.35	0.322584	0.110338	2.92359	0.00346018	0.0323772
Tpm4	ENSMUSG00000031799	protein_coding	326618	9886.74	0.321534	0.066968	4.80131	1.57632e-06	5.69407e-05
Camk2a	ENSMUSG00000024617	protein_coding	12322	622.502	0.321355	0.110928	2.89698	0.00376778	0.0345551
Gyg	ENSMUSG00000019528	protein_coding	27357	1436.63	0.321118	0.0829973	3.86901	0.000109276	0.00206537
Polr1d	ENSMUSG00000029642	protein_coding	20018	3126.61	0.318858	0.0906588	3.51712	0.000436256	0.00633822
Myo1c	ENSMUSG00000017774	protein_coding	NA	4708.63	0.317382	0.0700789	4.52893	5.92838e-06	0.000176161
Thra	ENSMUSG00000058756	protein_coding	21833	1803.27	0.314918	0.0893815	3.5233	0.000426211	0.00622946
Ndufb1-ps	ENSMUSG00000113902	protein_coding	NA	1182.88	0.314851	0.0798147	3.94477	7.98773e-05	0.00160752
Impdh1	ENSMUSG00000003500	protein_coding	23917	4115.23	0.313389	0.0794528	3.94435	8.00183e-05	0.00160846
Aaas	ENSMUSG00000036678	protein_coding	223921	2580.6	0.312772	0.067413	4.63964	3.49011e-06	0.000111462
Tjp2	ENSMUSG00000024812	protein_coding	21873	674.882	0.312422	0.0699492	4.46641	7.95421e-06	0.000228797
Gm48583	ENSMUSG00000114277	processed_pseudogene	NA	250.394	0.311845	0.108604	2.87139	0.00408669	0.0365577
Snx25	ENSMUSG00000038291	protein_coding	102141	1180.41	0.310953	0.0779984	3.98666	6.70086e-05	0.00140999
Csrp1	ENSMUSG00000026421	protein_coding	13007	1859.25	0.309092	0.0927469	3.33264	0.000860272	0.0109773
Gm17491	ENSMUSG00000097042	sense_intronic	NA	632.936	0.308261	0.0968638	3.18241	0.00146053	0.0166846
Actg1	ENSMUSG00000062825	protein_coding	11465	27866.2	0.307774	0.0795693	3.868	0.000109731	0.00207167
Npepps	ENSMUSG00000001441	protein_coding	19155	8146.36	0.307433	0.071953	4.2727	1.93122e-05	0.000492489
NA	NA	NA	NA	398.45	0.306912	0.0926579	3.31231	0.000925289	0.0116503
Atxn1	ENSMUSG00000046876	protein_coding	20238	1887.88	0.306779	0.0846816	3.62273	0.000291508	0.00459475
P4hb	ENSMUSG00000025130	protein_coding	18453	41702.3	0.306551	0.0992881	3.08749	0.00201858	0.021422
Rnpep	ENSMUSG00000041926	protein_coding	215615	1092.58	0.306047	0.0772721	3.96064	7.4748e-05	0.00153135
Hip1r	ENSMUSG00000000915	protein_coding	29816	3551.83	0.305478	0.0925558	3.30047	0.000965224	0.0120908
Mcm10	ENSMUSG00000026669	protein_coding	70024	280.368	0.304883	0.103072	2.95796	0.00309683	0.0297763
Dynll1	ENSMUSG00000009013	protein_coding	NA	2635.29	0.303844	0.0879067	3.45644	0.000547358	0.00762197
Rfc5	ENSMUSG00000029363	protein_coding	NA	993.585	0.303757	0.0956206	3.17669	0.00148966	0.0169343
Myc	ENSMUSG00000022346	protein_coding	17869	12654.2	0.303312	0.0905808	3.34852	0.000812441	0.0104923
Hoxc13	ENSMUSG00000001655	protein_coding	NA	1017.95	0.302835	0.0849672	3.56414	0.000365049	0.00551967
NA	NA	NA	NA	7256.1	0.302594	0.0972859	3.11036	0.00186857	0.0201938
Ap3m1	ENSMUSG00000021824	protein_coding	55946	5840.46	0.301629	0.0679691	4.43774	9.09073e-06	0.000255048
Adamts10	ENSMUSG00000024299	protein_coding	224697	762.934	0.301208	0.0918452	3.27952	0.00103983	0.0129024
Pir	ENSMUSG00000031379	protein_coding	NA	976.689	0.300222	0.089246	3.36398	0.000768268	0.0100127
Pten	ENSMUSG00000013663	protein_coding	19211	2975.63	0.299285	0.0850992	3.5169	0.00043662	0.00633822
Prcp	ENSMUSG00000061119	protein_coding	72461	855.074	0.297232	0.0692106	4.29461	1.75004e-05	0.000453049
Rbm3	ENSMUSG00000031167	protein_coding	NA	6570.73	0.295876	0.0482567	6.13129	8.71667e-10	7.56005e-08
Ccn4	ENSMUSG00000005124	protein_coding	22402	1531.43	0.295689	0.0779891	3.79142	0.00014979	0.00264119
mt-Tp	ENSMUSG00000064372	Mt_tRNA	NA	92742.1	0.295575	0.0930551	3.17635	0.00149142	0.0169431
Haus6	ENSMUSG00000038047	protein_coding	230376	910.299	0.294674	0.0954921	3.08584	0.00202977	0.0215274
mt-Te	ENSMUSG00000064369	Mt_tRNA	NA	1389.24	0.294608	0.0941078	3.13054	0.00174487	0.0190679
Rdh11	ENSMUSG00000066441	protein_coding	17252	753.645	0.294319	0.0791961	3.71634	0.000202133	0.00338262
Zfp53	ENSMUSG00000057409	protein_coding	24132	4562.2	0.293995	0.0682782	4.30584	1.66355e-05	0.000432624
NA	NA	NA	NA	3417.55	0.293329	0.0814024	3.60344	0.000314029	0.00488216
Tmem263	ENSMUSG00000060935	protein_coding	103266	1903.74	0.293299	0.070967	4.13289	3.58224e-05	0.000829744
Polr3g	ENSMUSG00000035834	protein_coding	67486	273.832	0.292913	0.100235	2.92226	0.00347498	0.0324623
Atg4a	ENSMUSG00000079418	protein_coding	NA	270.888	0.292461	0.0949863	3.07898	0.00207713	0.0219479
Tmem97	ENSMUSG00000037278	protein_coding	NA	621.46	0.292212	0.102795	2.84266	0.00447384	0.0391398
Atl2	ENSMUSG00000059811	protein_coding	56298	1668.79	0.291942	0.0694777	4.20195	2.6463e-05	0.000648853
Gm26642	ENSMUSG00000097680	antisense	NA	391.547	0.29168	0.0896836	3.25232	0.00114467	0.0138917
Vrk1	ENSMUSG00000021115	protein_coding	22367	389.683	0.290239	0.103244	2.8112	0.00493572	0.0422857
Tgfb1i1	ENSMUSG00000030782	protein_coding	21804	2240.66	0.290104	0.101646	2.85407	0.00431628	0.0381967
Hat1	ENSMUSG00000027018	protein_coding	107435	824.946	0.289005	0.0860536	3.35843	0.000783857	0.010177
Mdm2	ENSMUSG00000020184	protein_coding	17246	17272.5	0.288383	0.0853469	3.37895	0.000727631	0.00962252
Gm37885	ENSMUSG00000102234	antisense	NA	1589.45	0.287811	0.0964463	2.98415	0.00284364	0.0279072
Sec23a	ENSMUSG00000020986	protein_coding	20334	1496.95	0.286366	0.0924525	3.09744	0.00195198	0.0208317
mt-Cytb	ENSMUSG00000064370	protein_coding	NA	52611.9	0.284678	0.0885864	3.21357	0.00131098	0.0155121
Sri	ENSMUSG00000003161	protein_coding	109552	1406.07	0.28431	0.0612556	4.64138	3.46098e-06	0.000110738
Golga2	ENSMUSG00000002546	protein_coding	99412	2223.92	0.282539	0.0608153	4.64585	3.38685e-06	0.000108774
Gm36033	ENSMUSG00000111058	lincRNA	NA	895.774	0.282162	0.0932021	3.02742	0.0024665	0.0251498
Rnd3	ENSMUSG00000017144	protein_coding	74194	1360.41	0.281826	0.0766685	3.6759	0.000237009	0.00387217
Maged2	ENSMUSG00000025268	protein_coding	NA	1717.14	0.281631	0.0930151	3.0278	0.0024634	0.0251432
Dennd3	ENSMUSG00000036661	protein_coding	105841	426.367	0.28126	0.0954591	2.9464	0.003215	0.0306537
Xpo1	ENSMUSG00000020290	protein_coding	103573	7552.42	0.280737	0.0982323	2.85789	0.00426468	0.0378526
Ahi1	ENSMUSG00000019986	protein_coding	52906	846.936	0.280128	0.0794601	3.52539	0.000422859	0.00619637
Cdk6	ENSMUSG00000040274	protein_coding	12571	2148.19	0.278746	0.0737576	3.77921	0.000157324	0.00274308
Rsu1	ENSMUSG00000026727	protein_coding	20163	1118.3	0.278483	0.0663325	4.19828	2.68949e-05	0.000656466
Taok3	ENSMUSG00000061288	protein_coding	330177	2639.27	0.277994	0.0712967	3.89912	9.65441e-05	0.0018809
Cab39l	ENSMUSG00000021981	protein_coding	69008	643.437	0.277123	0.0701115	3.95261	7.73049e-05	0.00156682
Irgq	ENSMUSG00000041037	protein_coding	210146	1875.07	0.276555	0.0697552	3.96465	7.35027e-05	0.00151127
Pea15a	ENSMUSG00000013698	protein_coding	18611	2552.17	0.275967	0.0603504	4.57275	4.81355e-06	0.000148455
Sh3bp4	ENSMUSG00000036206	protein_coding	98402	1632.33	0.275902	0.0643277	4.28901	1.79473e-05	0.000463915
Xpnpep1	ENSMUSG00000025027	protein_coding	170750	3423.8	0.274693	0.073383	3.74328	0.000181635	0.00309722
Serpinh1	ENSMUSG00000070436	protein_coding	NA	34240.5	0.274445	0.0902501	3.04094	0.0023584	0.0243184
3830403N18Rik	ENSMUSG00000031125	protein_coding	NA	1312.32	0.274256	0.0751182	3.65099	0.000261232	0.00419099
Chmp2b	ENSMUSG00000004843	protein_coding	68942	1806.85	0.274236	0.0489739	5.59963	2.14805e-08	1.40082e-06
Rap2b	ENSMUSG00000036894	protein_coding	74012	1386.74	0.271935	0.069391	3.91888	8.89603e-05	0.00176485
Tubb4b	ENSMUSG00000036752	protein_coding	227613	4107.88	0.271159	0.0828591	3.27253	0.00106588	0.0131682
Gm10052	ENSMUSG00000058922	processed_pseudogene	NA	1732.85	0.270745	0.0671297	4.03316	5.50308e-05	0.00119931
Dbf4	ENSMUSG00000002297	protein_coding	27214	1219.64	0.270431	0.0708729	3.81572	0.000135786	0.00244473
Zmat3	ENSMUSG00000027663	protein_coding	22401	5409.66	0.270027	0.0740169	3.64818	0.000264107	0.00422522
Pip5k1b	ENSMUSG00000024867	protein_coding	18719	1252.27	0.268651	0.074162	3.62249	0.000291777	0.00459475
Mxd4	ENSMUSG00000037235	protein_coding	17122	1604.04	0.267963	0.0691586	3.87461	0.000106795	0.00203423
Yipf5	ENSMUSG00000024487	protein_coding	67180	1714.16	0.26707	0.0666627	4.00628	6.16824e-05	0.00131738
Bcap31	ENSMUSG00000002015	protein_coding	NA	5648.99	0.264119	0.0784272	3.3677	0.000757971	0.00989358
Bcl2l1	ENSMUSG00000007659	protein_coding	12048	5897.46	0.26327	0.0667246	3.94563	7.95905e-05	0.00160364
Map6	ENSMUSG00000055407	protein_coding	17760	1633.01	0.261948	0.0722821	3.62397	0.000290119	0.0045813
Fundc2	ENSMUSG00000031198	protein_coding	NA	1858.92	0.26156	0.0673266	3.88495	0.000102352	0.00196493
Prdx4	ENSMUSG00000025289	protein_coding	NA	2003.57	0.261022	0.0933904	2.79496	0.00519065	0.0438179
Sh3bgrl	ENSMUSG00000031246	protein_coding	NA	2914.08	0.260446	0.0884834	2.94344	0.00324585	0.0309306
Kcnk2	ENSMUSG00000037624	protein_coding	16526	505.447	0.26028	0.087569	2.97228	0.00295593	0.028827
Aplf	ENSMUSG00000030051	protein_coding	72103	420.538	0.259667	0.0899448	2.88695	0.0038899	0.0354468
Vps37b	ENSMUSG00000066278	protein_coding	330192	5005.72	0.259217	0.089457	2.89768	0.00375939	0.0345153
Pcyt1a	ENSMUSG00000005615	protein_coding	13026	1043.17	0.257524	0.0825593	3.11926	0.00181305	0.0196435
Flnb	ENSMUSG00000025278	protein_coding	286940	14331.1	0.256932	0.0780354	3.29251	0.00099299	0.0123841
Hspa8	ENSMUSG00000015656	protein_coding	15481	112468	0.256921	0.0677763	3.79073	0.000150208	0.00264583
Acer3	ENSMUSG00000030760	protein_coding	66190	1003.1	0.253716	0.0606859	4.1808	2.9048e-05	0.000697071
Eif2a	ENSMUSG00000027810	protein_coding	229317	2799.86	0.25341	0.0563996	4.49312	7.0188e-06	0.000204997
Sec22b	ENSMUSG00000027879	protein_coding	20333	2696.68	0.253165	0.0616568	4.10604	4.02495e-05	0.000915717
Lpin1	ENSMUSG00000020593	protein_coding	14245	816.306	0.250102	0.0744461	3.35951	0.000780816	0.010153
Pdp1	ENSMUSG00000049225	protein_coding	NA	1008.81	0.246788	0.0709339	3.47913	0.000503052	0.00710482
Cyp20a1	ENSMUSG00000049439	protein_coding	77951	1674.85	0.24667	0.0582938	4.23149	2.32145e-05	0.000578196
Vcl	ENSMUSG00000021823	protein_coding	22330	8054.99	0.245589	0.0890816	2.7569	0.00583517	0.0475213
Khnyn	ENSMUSG00000047153	protein_coding	219094	2010.26	0.245328	0.0560779	4.37478	1.21557e-05	0.000329671
Gramd1a	ENSMUSG00000001248	protein_coding	52857	5581.57	0.24505	0.0444437	5.51371	3.51352e-08	2.12879e-06
Tctn3	ENSMUSG00000025008	protein_coding	NA	1108.86	0.244569	0.0695909	3.51439	0.000440769	0.00638063
BC017158	ENSMUSG00000030780	protein_coding	NA	1480.48	0.243782	0.0848273	2.87386	0.00405484	0.0363871
Slc35f5	ENSMUSG00000026342	protein_coding	74150	1049.11	0.242607	0.0871211	2.78471	0.00535762	0.0447193
Arf4	ENSMUSG00000021877	protein_coding	11843	10563.4	0.240409	0.0617813	3.89129	9.97119e-05	0.00192506
NA	NA	NA	NA	7145.63	0.239947	0.0832085	2.88368	0.00393058	0.0357603
Prkar2b	ENSMUSG00000002997	protein_coding	19088	2415.37	0.239874	0.0811436	2.95617	0.00311489	0.0299162
Mtss1	ENSMUSG00000022353	protein_coding	211401	1127.96	0.2393	0.0834849	2.86639	0.00415186	0.0370226
Galnt11	ENSMUSG00000038072	protein_coding	231050	943.224	0.239071	0.0646498	3.69794	0.000217356	0.00358125
Tdp2	ENSMUSG00000035958	protein_coding	56196	1189.28	0.238595	0.0616591	3.86959	0.00010902	0.00206282
Micu2	ENSMUSG00000021973	protein_coding	68514	964.628	0.238111	0.071301	3.33952	0.000839239	0.0107769
Cetn3	ENSMUSG00000021537	protein_coding	12626	987.303	0.237333	0.0628731	3.77479	0.000160144	0.00278354
Mapre2	ENSMUSG00000024277	protein_coding	212307	1128.89	0.235695	0.0783971	3.00642	0.00264345	0.0265215
R74862	ENSMUSG00000059277	processed_transcript	NA	877.226	0.235668	0.0850018	2.77251	0.00556263	0.0459374
Sgk1	ENSMUSG00000019970	protein_coding	20393	7687.11	0.235616	0.0798525	2.95064	0.00317118	0.0303206
Ehd4	ENSMUSG00000027293	protein_coding	98878	886.883	0.23513	0.0672471	3.4965	0.000471396	0.00675429
Wsb2	ENSMUSG00000029364	protein_coding	59043	2821.71	0.234814	0.0692895	3.38888	0.000701787	0.00938977
Gbf1	ENSMUSG00000025224	protein_coding	107338	4826.81	0.233479	0.0754785	3.09332	0.00197933	0.0210709
Rabggtb	ENSMUSG00000038975	protein_coding	NA	5420.1	0.233308	0.0728335	3.2033	0.00135862	0.0159432
Mlec	ENSMUSG00000048578	protein_coding	109154	9219.69	0.232189	0.0626507	3.7061	0.000210478	0.00349148
Prim2	ENSMUSG00000026134	protein_coding	19076	567.985	0.23092	0.0796795	2.89812	0.00375411	0.0344853
Prkar1b	ENSMUSG00000025855	protein_coding	19085	2507.84	0.23077	0.0823395	2.80267	0.00506821	0.0430609
Dnajc9	ENSMUSG00000021811	protein_coding	NA	901.788	0.230461	0.0822178	2.80305	0.00506214	0.0430307
Sh2b3	ENSMUSG00000042594	protein_coding	16923	1533.62	0.228473	0.0616135	3.70816	0.000208767	0.00348317
Adk	ENSMUSG00000039197	protein_coding	11534	994.614	0.227827	0.0673844	3.381	0.000722217	0.00956573
Prnd	ENSMUSG00000027338	protein_coding	26434	4872.63	0.227798	0.0596335	3.81997	0.000133468	0.00241316
Ube2e2	ENSMUSG00000058317	protein_coding	218793	897.343	0.22583	0.0713712	3.16416	0.00155534	0.0174608
Bhlhe40	ENSMUSG00000030103	protein_coding	20893	18836.8	0.22522	0.0748645	3.00836	0.00262659	0.0263832
Cox6c	ENSMUSG00000014313	protein_coding	12864	3583.35	0.22489	0.081509	2.75908	0.00579644	0.0472895
Tceal9	ENSMUSG00000042712	protein_coding	NA	4191.03	0.224632	0.0558405	4.02275	5.75223e-05	0.00124883
Ckap4	ENSMUSG00000046841	protein_coding	NA	4840.54	0.223773	0.0603618	3.70719	0.000209569	0.00348317
Ess2	ENSMUSG00000003527	protein_coding	27886	1083.84	0.22326	0.0700349	3.18784	0.00143341	0.0165036
Xlr	ENSMUSG00000054626	protein_coding	NA	1017.23	0.22133	0.0658184	3.36274	0.000771738	0.0100426
Cdk2	ENSMUSG00000025358	protein_coding	NA	2229.24	0.220035	0.0655393	3.3573	0.000787091	0.0102113
Rubcn	ENSMUSG00000035629	protein_coding	100502698	2070.37	0.218666	0.0645787	3.38603	0.000709106	0.00946546
BC005537	ENSMUSG00000019132	protein_coding	79555	9420.41	0.217979	0.0532614	4.09263	4.26508e-05	0.000965024
Ugcg	ENSMUSG00000028381	protein_coding	22234	12566.5	0.217892	0.0572167	3.80819	0.00013999	0.00249935
Copg1	ENSMUSG00000030058	protein_coding	54161	7982.05	0.217883	0.0652899	3.33716	0.000846397	0.0108407
Ifrd2	ENSMUSG00000010048	protein_coding	NA	1087.34	0.216576	0.0720868	3.00438	0.00266122	0.0266528
Arl1	ENSMUSG00000060904	protein_coding	104303	5050.28	0.215575	0.0596598	3.6134	0.000302209	0.00472026
Stat6	ENSMUSG00000002147	protein_coding	20852	4594.09	0.215075	0.0632064	3.40273	0.000667151	0.00901102
Cux1	ENSMUSG00000029705	protein_coding	13047	2924.78	0.215064	0.0666175	3.22835	0.00124508	0.0148558
Pola2	ENSMUSG00000024833	protein_coding	18969	1727.64	0.215012	0.0676197	3.17973	0.00147414	0.0168026
Lhfp	ENSMUSG00000048332	protein_coding	108927	2544.89	0.214021	0.0642599	3.33056	0.000866717	0.0110348
Trim24	ENSMUSG00000029833	protein_coding	21848	2087.62	0.211893	0.0627495	3.37681	0.000733326	0.00966046
Atp6v0a1	ENSMUSG00000019302	protein_coding	11975	1809.32	0.211827	0.0564288	3.75388	0.000174115	0.00298687
Mrpl21	ENSMUSG00000024829	protein_coding	353242	6344.36	0.206364	0.0622179	3.3168	0.000910561	0.0114903
Rida	ENSMUSG00000022323	protein_coding	15473	871.516	0.206338	0.0699727	2.94884	0.00318973	0.0304468
Cpt1c	ENSMUSG00000007783	protein_coding	78070	1370.73	0.205652	0.0742128	2.77112	0.00558645	0.0460666
Pvr	ENSMUSG00000040511	protein_coding	NA	4338.27	0.204101	0.0630956	3.23478	0.00121735	0.0146125
Fech	ENSMUSG00000024588	protein_coding	14151	1406.24	0.204068	0.0673511	3.02991	0.00244627	0.0250581
Ift57	ENSMUSG00000032965	protein_coding	73916	637.432	0.20387	0.0714325	2.85403	0.00431686	0.0381967
Sc5d	ENSMUSG00000032018	protein_coding	235293	1384.87	0.20387	0.0730303	2.79158	0.0052452	0.0441258
Arhgap23	ENSMUSG00000049807	protein_coding	58996	2571.14	0.203052	0.0711948	2.85206	0.00434362	0.0383938
Cfp	ENSMUSG00000001128	protein_coding	NA	2646.05	0.203004	0.05402	3.75794	0.000171317	0.00294776
Polr3gl	ENSMUSG00000028104	protein_coding	69870	1010.43	0.201061	0.0599557	3.35349	0.000797997	0.010337
Nup107	ENSMUSG00000052798	protein_coding	103468	2109.18	0.200358	0.0599356	3.34289	0.000829102	0.0106752
Arf1	ENSMUSG00000048076	protein_coding	11840	14499.4	0.200131	0.0571358	3.50272	0.000460542	0.00662916
Klhl5	ENSMUSG00000054920	protein_coding	71778	1273.28	0.198821	0.0664886	2.9903	0.002787	0.0274935
Pfkm	ENSMUSG00000033065	protein_coding	18642	2203	0.198574	0.0708222	2.80384	0.00504979	0.0429685
Calcoco1	ENSMUSG00000023055	protein_coding	67488	8326.77	0.196537	0.0564111	3.48401	0.000493968	0.00699838
Tmed2	ENSMUSG00000029390	protein_coding	56334	5747.57	0.196263	0.0449296	4.36824	1.25252e-05	0.000338616
Klhl21	ENSMUSG00000073700	protein_coding	NA	5621.57	0.195758	0.0520357	3.76199	0.000168567	0.00290922
Ugdh	ENSMUSG00000029201	protein_coding	22235	7754.71	0.195178	0.0431717	4.52097	6.15565e-06	0.000182475
Vdac1	ENSMUSG00000020402	protein_coding	22333	7605.02	0.195032	0.0611328	3.1903	0.00142127	0.0164392
Eif2b5	ENSMUSG00000003235	protein_coding	224045	2599.49	0.194962	0.0611805	3.18666	0.00143925	0.0165212
Ei24	ENSMUSG00000062762	protein_coding	13663	1592.59	0.193248	0.0561667	3.44061	0.000580396	0.00800638
Ubtd2	ENSMUSG00000044949	protein_coding	327900	771.774	0.192312	0.0630361	3.05081	0.00228221	0.0237334
Etfdh	ENSMUSG00000027809	protein_coding	66841	1315.48	0.187042	0.058576	3.19315	0.00140728	0.016379
Nde1	ENSMUSG00000022678	protein_coding	67203	1776.38	0.186701	0.0614856	3.0365	0.00239341	0.02462
AI506816	ENSMUSG00000105987	processed_transcript	NA	4510.11	0.184327	0.0586907	3.14065	0.00168571	0.0186301
Nsun2	ENSMUSG00000021595	protein_coding	28114	5934.09	0.184094	0.0663901	2.77291	0.00555582	0.0459357
Fam8a1	ENSMUSG00000069237	protein_coding	97863	2744.75	0.179861	0.05282	3.40516	0.000661245	0.00895248
Klf13	ENSMUSG00000052040	protein_coding	50794	1624.16	0.178633	0.0560549	3.18676	0.00143877	0.0165212
Gm15398	ENSMUSG00000085456	lincRNA	NA	1506.38	0.178632	0.0616362	2.89816	0.00375354	0.0344853
Clk3	ENSMUSG00000032316	protein_coding	NA	2757.48	0.178424	0.0524814	3.39977	0.000674435	0.00908069
Vps26c	ENSMUSG00000022898	protein_coding	NA	2351.99	0.178177	0.0528053	3.37423	0.000740225	0.00973728
Npm1	ENSMUSG00000057113	protein_coding	18148	49430.4	0.178177	0.0624969	2.85097	0.00435867	0.038487
NA	NA	NA	NA	3309.45	0.177412	0.0549864	3.22648	0.00125324	0.0149427
Scyl1	ENSMUSG00000024941	protein_coding	78891	36307.3	0.176193	0.0488125	3.60958	0.000306695	0.00477684
Rxylt1	ENSMUSG00000034620	protein_coding	216395	1979.9	0.175905	0.0620261	2.83598	0.0045685	0.0398455
Cfap43	ENSMUSG00000044948	protein_coding	100048534	4728.88	0.173867	0.0602327	2.88659	0.00389438	0.0354687
Tmem167	ENSMUSG00000012422	protein_coding	66074	2716.39	0.171936	0.0559279	3.07424	0.00211037	0.0222167
Snx29	ENSMUSG00000071669	protein_coding	74478	1183.53	0.170519	0.0606243	2.81272	0.00491246	0.0421357
Pdxdc1	ENSMUSG00000022680	protein_coding	94184	3382.17	0.170057	0.0520474	3.26734	0.00108562	0.0133734
Hnrnpa1	ENSMUSG00000046434	protein_coding	15382	27063.3	0.169597	0.0506639	3.3475	0.000815443	0.0105232
Ano8	ENSMUSG00000034863	protein_coding	NA	4093.61	0.168604	0.0605284	2.78554	0.00534389	0.044692
Nup85	ENSMUSG00000020739	protein_coding	445007	2097.59	0.168382	0.0588763	2.85993	0.00423741	0.0376301
Zcchc8	ENSMUSG00000029427	protein_coding	70650	1909.15	0.167534	0.0499852	3.35168	0.00080323	0.0103812
Tnk2	ENSMUSG00000022791	protein_coding	51789	7820.84	0.167217	0.0581457	2.87583	0.00402967	0.0362755
Sfr1	ENSMUSG00000025066	protein_coding	67788	9950.1	0.166739	0.0474406	3.5147	0.000440251	0.00638009
Glt28d2	ENSMUSG00000031286	protein_coding	320302	3283.5	0.166156	0.0590343	2.81456	0.00488433	0.0419998
Fkbp9	ENSMUSG00000029781	protein_coding	27055	6085.74	0.164059	0.0588924	2.78573	0.00534069	0.0446871
Brd9	ENSMUSG00000057649	protein_coding	105246	1290.93	0.161758	0.0591039	2.73684	0.00620326	0.0497834
Slc37a3	ENSMUSG00000029924	protein_coding	72144	1413.63	0.160932	0.0496097	3.24397	0.00117877	0.0142135
Arfip2	ENSMUSG00000030881	protein_coding	76932	1531.14	0.16088	0.0559172	2.87711	0.00401338	0.0362435
Oat	ENSMUSG00000030934	protein_coding	18242	4050.37	0.15959	0.0523646	3.04766	0.00230629	0.0239109
Maged1	ENSMUSG00000025151	protein_coding	NA	15486	0.156663	0.0566549	2.76521	0.00568857	0.0466835
Rheb	ENSMUSG00000028945	protein_coding	19744	2323.13	0.156485	0.0549364	2.84847	0.00439306	0.0386792
Cep170b	ENSMUSG00000072825	protein_coding	NA	6202.13	0.154187	0.0543465	2.83711	0.00455245	0.0397664
Selenof	ENSMUSG00000037072	protein_coding	93684	7730.53	0.152611	0.0376077	4.05796	4.95034e-05	0.00108856
Etfa	ENSMUSG00000032314	protein_coding	110842	1492.15	0.151446	0.0500527	3.02574	0.00248027	0.025255
Nudt5	ENSMUSG00000025817	protein_coding	53893	1394.42	0.14663	0.0486058	3.01672	0.00255524	0.0258489
Actn4	ENSMUSG00000054808	protein_coding	60595	16323.3	0.146123	0.0435861	3.35251	0.000800817	0.0103579
Paics	ENSMUSG00000029247	protein_coding	67054	8217.38	0.143505	0.0370696	3.87124	0.000108281	0.00205252
Cct8	ENSMUSG00000025613	protein_coding	12469	8737.01	0.141133	0.0463553	3.0446	0.00232992	0.0240683
Glyr1	ENSMUSG00000022536	protein_coding	74022	4166.02	0.126708	0.0439792	2.8811	0.0039629	0.0359395
Rhod	ENSMUSG00000041845	protein_coding	11854	3281.06	0.12608	0.0459155	2.74591	0.00603432	0.0487251
Ube2j1	ENSMUSG00000028277	protein_coding	56228	4075.55	0.123819	0.0371951	3.32891	0.00087188	0.0110923
Sumf2	ENSMUSG00000025538	protein_coding	67902	13290.2	0.0927668	0.0333979	2.77762	0.00547581	0.0454835
Amfr	ENSMUSG00000031751	protein_coding	23802	5043.05	-0.102243	0.0363487	-2.81283	0.00491069	0.0421357
Mta2	ENSMUSG00000071646	protein_coding	23942	4693.54	-0.117112	0.038746	-3.02256	0.00250647	0.0254763
Map2k7	ENSMUSG00000002948	protein_coding	26400	2386.37	-0.122402	0.0433476	-2.82373	0.0047469	0.0410869
Rala	ENSMUSG00000008859	protein_coding	56044	3062.63	-0.125455	0.0442748	-2.83355	0.00460341	0.0401091
Gns	ENSMUSG00000034707	protein_coding	75612	13846.5	-0.129511	0.0430432	-3.00886	0.0026223	0.0263557
Supt6	ENSMUSG00000002052	protein_coding	20926	4374.73	-0.129563	0.0438546	-2.95438	0.00313296	0.030056
Atxn7l3	ENSMUSG00000059995	protein_coding	NA	3248.23	-0.138021	0.0399939	-3.45104	0.000558423	0.00775079
Nrd1	ENSMUSG00000053510	protein_coding	230598	7327.61	-0.139258	0.0400464	-3.47742	0.000506268	0.00714294
Zfp740	ENSMUSG00000046897	protein_coding	68744	11518.3	-0.143764	0.0506974	-2.83573	0.00457205	0.0398561
Pcgf2	ENSMUSG00000018537	protein_coding	22658	3283.39	-0.144482	0.0508107	-2.84353	0.00446166	0.0390533
Rbm10	ENSMUSG00000031060	protein_coding	NA	2181.09	-0.146826	0.0502891	-2.91964	0.0035044	0.0326478
Akirin1	ENSMUSG00000023075	protein_coding	68050	2551.45	-0.15241	0.0555377	-2.74427	0.00606457	0.048877
Crtc3	ENSMUSG00000030527	protein_coding	70461	1876.53	-0.154318	0.0526445	-2.93133	0.00337516	0.0317205
Pttg1ip	ENSMUSG00000009291	protein_coding	108705	17971.8	-0.155696	0.0395605	-3.93564	8.29766e-05	0.00166401
Gak	ENSMUSG00000062234	protein_coding	231580	4026.23	-0.155905	0.0453593	-3.4371	0.000587973	0.00809516
Parvb	ENSMUSG00000022438	protein_coding	170736	8644.04	-0.162015	0.0552164	-2.93418	0.00334431	0.0315
Slc6a8	ENSMUSG00000019558	protein_coding	NA	10451.5	-0.163432	0.0506626	-3.22589	0.00125579	0.0149627
Sod2	ENSMUSG00000006818	protein_coding	20656	1961.09	-0.164199	0.0569998	-2.8807	0.00396797	0.0359541
Fam98c	ENSMUSG00000030590	protein_coding	NA	3531.57	-0.166192	0.0536452	-3.09798	0.00194842	0.0208197
Cdk5rap2	ENSMUSG00000039298	protein_coding	214444	2236.32	-0.167257	0.0587796	-2.8455	0.00443415	0.0388921
Fus	ENSMUSG00000030795	protein_coding	233908	9073.56	-0.172305	0.0538026	-3.20255	0.00136218	0.0159619
Sap130	ENSMUSG00000024260	protein_coding	269003	2418.29	-0.172904	0.0452417	-3.82178	0.000132491	0.00239802
Fbxo42	ENSMUSG00000028920	protein_coding	213499	1678.86	-0.175344	0.053813	-3.25839	0.00112047	0.013696
Zfp142	ENSMUSG00000026135	protein_coding	77264	1316.01	-0.177488	0.0621746	-2.85466	0.00430823	0.0381797
Taf15	ENSMUSG00000020680	protein_coding	70439	7558.89	-0.177913	0.0611512	-2.90939	0.00362136	0.0335066
Leng8	ENSMUSG00000035545	protein_coding	232798	5885.99	-0.179889	0.0556045	-3.23515	0.00121579	0.0146083
Nol6	ENSMUSG00000028430	protein_coding	230082	4076.86	-0.17992	0.0637074	-2.82416	0.0047405	0.0410523
D11Wsu47e	ENSMUSG00000041623	protein_coding	276852	788.915	-0.180406	0.065955	-2.73529	0.00623254	0.049948
Nek9	ENSMUSG00000034290	protein_coding	217718	3458.85	-0.180759	0.0587847	-3.07493	0.00210551	0.0221793
Leo1	ENSMUSG00000042487	protein_coding	235497	1021.88	-0.180967	0.064374	-2.81117	0.00493612	0.0422857
Naa35	ENSMUSG00000021555	protein_coding	78689	2456.87	-0.181153	0.0525663	-3.44617	0.000568588	0.00787268
Camk2n1	ENSMUSG00000046447	protein_coding	66259	2236.45	-0.181557	0.0643857	-2.81983	0.00480489	0.0415047
Cdr2l	ENSMUSG00000050910	protein_coding	237988	12278.4	-0.182796	0.0660389	-2.768	0.0056401	0.0464195
Ncbp1	ENSMUSG00000028330	protein_coding	433702	3845.99	-0.183512	0.0494814	-3.7087	0.000208328	0.00348287
Rnf149	ENSMUSG00000048234	protein_coding	67702	1477.75	-0.185089	0.0629148	-2.9419	0.00326203	0.0309948
Ptger1	ENSMUSG00000019464	protein_coding	NA	1853.35	-0.186525	0.0676068	-2.75897	0.0057984	0.0472895
Mrps24	ENSMUSG00000020477	protein_coding	64660	3032.69	-0.18687	0.0579372	-3.22539	0.00125801	0.0149787
Septin8	ENSMUSG00000018398	protein_coding	20362	7242.98	-0.188516	0.0642416	-2.93449	0.00334099	0.031486
Banp	ENSMUSG00000025316	protein_coding	53325	1569.22	-0.188519	0.0582843	-3.23447	0.00121871	0.0146125
Klc2	ENSMUSG00000024862	protein_coding	NA	2557.15	-0.189682	0.0690422	-2.74733	0.00600824	0.0485834
Ino80	ENSMUSG00000034154	protein_coding	68142	2043.73	-0.191471	0.064619	-2.96308	0.00304579	0.0294613
Ampd2	ENSMUSG00000027889	protein_coding	NA	3535.94	-0.191528	0.0642814	-2.97953	0.00288693	0.0282671
Itgb7	ENSMUSG00000001281	protein_coding	16421	22360.7	-0.195174	0.0620949	-3.14315	0.00167138	0.0185316
Trim25	ENSMUSG00000000275	protein_coding	217069	4625.97	-0.197483	0.0717633	-2.75186	0.00592573	0.0481212
mt-Co1	ENSMUSG00000064351	protein_coding	NA	199521	-0.19785	0.0630621	-3.13739	0.00170461	0.0187808
Pex3	ENSMUSG00000019809	protein_coding	56535	859.221	-0.19797	0.0713274	-2.77551	0.00551148	0.0457068
S1pr2	ENSMUSG00000043895	protein_coding	14739	1765.43	-0.198477	0.0629719	-3.15183	0.00162252	0.018072
Prmt3	ENSMUSG00000030505	protein_coding	71974	2605.39	-0.200905	0.0567173	-3.54223	0.000396764	0.00590515
Irf9	ENSMUSG00000002325	protein_coding	16391	2018.44	-0.20108	0.0695432	-2.89144	0.00383487	0.0350201
Mbd6	ENSMUSG00000025409	protein_coding	NA	13529.6	-0.201763	0.063394	-3.18268	0.00145917	0.0166846
Tm7sf3	ENSMUSG00000040234	protein_coding	67623	809.111	-0.204822	0.0713497	-2.87068	0.00409587	0.0366206
Rnf183	ENSMUSG00000063851	protein_coding	76072	2733.83	-0.205282	0.0569895	-3.6021	0.000315662	0.00489864
Mast2	ENSMUSG00000003810	protein_coding	17776	7174.2	-0.207641	0.066394	-3.12741	0.00176355	0.0192413
Atpsckmt	ENSMUSG00000039065	protein_coding	68073	773.031	-0.207911	0.0660151	-3.14945	0.00163581	0.0182081
Kat2a	ENSMUSG00000020918	protein_coding	NA	3917.23	-0.208423	0.0602729	-3.45799	0.000544213	0.00758436
Steap3	ENSMUSG00000026389	protein_coding	68428	2036.17	-0.208913	0.0715214	-2.92098	0.00348933	0.0325429
Pdzd7	ENSMUSG00000074818	protein_coding	100503041	1649.23	-0.209673	0.0657376	-3.18955	0.00142496	0.0164395
Endov	ENSMUSG00000039850	protein_coding	NA	1208.12	-0.210042	0.0556051	-3.77738	0.000158484	0.0027603
Gaa	ENSMUSG00000025579	protein_coding	14387	14502.4	-0.211708	0.0530742	-3.98892	6.63758e-05	0.00140112
Sms	ENSMUSG00000071708	protein_coding	NA	1795.9	-0.211834	0.0651266	-3.25264	0.00114337	0.0138917
Unc5b	ENSMUSG00000020099	protein_coding	107449	5345.73	-0.213011	0.0759286	-2.80542	0.00502518	0.0427804
Entpd6	ENSMUSG00000033068	protein_coding	12497	719.246	-0.213334	0.0780084	-2.73476	0.00624265	0.0499921
Gm23925	ENSMUSG00000064405	snoRNA	NA	4601.09	-0.213509	0.053926	-3.95929	7.51735e-05	0.00153687
Mesd	ENSMUSG00000038503	protein_coding	NA	3144.67	-0.213772	0.0516859	-4.13598	3.5344e-05	0.000821617
Golm1	ENSMUSG00000021556	protein_coding	105348	1351.06	-0.214265	0.0541641	-3.95586	7.62608e-05	0.00155488
Ino80e	ENSMUSG00000030689	protein_coding	NA	2109.12	-0.214651	0.0646632	-3.31952	0.000901709	0.0114038
B4galt5	ENSMUSG00000017929	protein_coding	56336	2047.72	-0.214696	0.0746547	-2.87585	0.00402943	0.0362755
Ctsb	ENSMUSG00000021939	protein_coding	13030	26036.7	-0.214875	0.0687254	-3.12657	0.00176861	0.0192842
Nop58	ENSMUSG00000026020	protein_coding	55989	5542.99	-0.215991	0.0599738	-3.60143	0.000316474	0.00490678
Pkn1	ENSMUSG00000057672	protein_coding	320795	2881.83	-0.216385	0.0598353	-3.61634	0.000298797	0.00468769
Hs6st1	ENSMUSG00000045216	protein_coding	50785	2578.97	-0.22088	0.0504886	-4.37485	1.21515e-05	0.000329671
Ngrn	ENSMUSG00000047084	protein_coding	NA	925.92	-0.220958	0.0806804	-2.73869	0.00616851	0.0495977
Myd88	ENSMUSG00000032508	protein_coding	NA	673.913	-0.221094	0.0797556	-2.77214	0.00556888	0.0459661
Abhd17c	ENSMUSG00000038459	protein_coding	70178	2494.39	-0.221201	0.0595174	-3.71657	0.000201945	0.00338262
Focad	ENSMUSG00000038368	protein_coding	230393	1093.49	-0.221229	0.0762147	-2.90271	0.00369949	0.0340936
Las1l	ENSMUSG00000057421	protein_coding	NA	2804.34	-0.223368	0.0585154	-3.81725	0.000134945	0.0024344
Pi4k2a	ENSMUSG00000025178	protein_coding	84095	6454.76	-0.22892	0.0486364	-4.70677	2.51673e-06	8.49466e-05
Wdr77	ENSMUSG00000000561	protein_coding	70465	3650.5	-0.229307	0.0574917	-3.98852	6.64878e-05	0.00140112
Hdac4	ENSMUSG00000026313	protein_coding	208727	1554.18	-0.229936	0.0733117	-3.13642	0.00171024	0.0188159
Nptn	ENSMUSG00000032336	protein_coding	20320	5427.57	-0.230938	0.0624016	-3.70084	0.000214889	0.00354743
C2cd5	ENSMUSG00000030279	protein_coding	74741	1072.26	-0.230972	0.0769156	-3.00293	0.0026739	0.0267171
Gdpd5	ENSMUSG00000035314	protein_coding	233552	728.998	-0.231373	0.0807516	-2.86524	0.00416697	0.0370817
Glg1	ENSMUSG00000003316	protein_coding	20340	8267	-0.231666	0.0805176	-2.87721	0.00401211	0.0362435
Tlk2	ENSMUSG00000020694	protein_coding	24086	4193.99	-0.231706	0.0474999	-4.87803	1.07152e-06	4.00611e-05
Srsf11	ENSMUSG00000055436	protein_coding	69207	9948.86	-0.231772	0.0758586	-3.05532	0.0022482	0.0234224
Dst	ENSMUSG00000026131	protein_coding	13518	10835	-0.231785	0.083407	-2.77897	0.00545319	0.0453398
Sh3bp5	ENSMUSG00000021892	protein_coding	24056	778.077	-0.231889	0.070273	-3.29983	0.000967446	0.0121097
Dpysl3	ENSMUSG00000024501	protein_coding	22240	2370.26	-0.23226	0.0757388	-3.0666	0.00216511	0.0226673
1700088E04Rik	ENSMUSG00000033029	protein_coding	27660	2929.11	-0.232944	0.0467448	-4.98331	6.25048e-07	2.528e-05
Cln3	ENSMUSG00000030720	protein_coding	12752	1067.26	-0.23404	0.065254	-3.58659	0.000335025	0.00513846
NA	NA	NA	NA	1715.03	-0.235969	0.085981	-2.74443	0.00606163	0.0488764
Aldh4a1	ENSMUSG00000028737	protein_coding	212647	2336.03	-0.237074	0.0593378	-3.99532	6.46068e-05	0.00137298
Tecpr1	ENSMUSG00000066621	protein_coding	70381	7297.23	-0.23737	0.0850594	-2.79064	0.00526038	0.0441708
Inpp5f	ENSMUSG00000042105	protein_coding	101490	1502.24	-0.237944	0.0774618	-3.07176	0.00212802	0.0223749
Etv4	ENSMUSG00000017724	protein_coding	18612	2399.18	-0.240235	0.0681342	-3.52592	0.000422022	0.00618941
Anxa7	ENSMUSG00000021814	protein_coding	11750	7359.22	-0.241718	0.0512046	-4.72063	2.35111e-06	8.01911e-05
Tor3a	ENSMUSG00000060519	protein_coding	30935	1075.48	-0.241921	0.0666983	-3.62709	0.000286633	0.00454305
Acaca	ENSMUSG00000020532	protein_coding	107476	1919.06	-0.242209	0.0708068	-3.4207	0.00062461	0.00853767
Cul5	ENSMUSG00000032030	protein_coding	75717	1532.11	-0.243752	0.0793098	-3.07342	0.00211623	0.0222647
Trim26	ENSMUSG00000024457	protein_coding	22670	2249.51	-0.244824	0.0595871	-4.10867	3.97947e-05	0.000908068
Abhd5	ENSMUSG00000032540	protein_coding	67469	873.96	-0.248741	0.077591	-3.20579	0.00134691	0.0158275
Ankrd11	ENSMUSG00000035569	protein_coding	77087	7638.45	-0.248793	0.0776792	-3.20283	0.00136083	0.0159582
Cep164	ENSMUSG00000043987	protein_coding	214552	2288.68	-0.250846	0.0532983	-4.70645	2.52066e-06	8.49466e-05
Dgka	ENSMUSG00000025357	protein_coding	13139	710.502	-0.250982	0.076446	-3.28313	0.00102662	0.0127569
Zfp408	ENSMUSG00000075040	protein_coding	NA	1300.5	-0.252662	0.0664419	-3.80276	0.000143095	0.00253886
Fbxl12	ENSMUSG00000066892	protein_coding	30843	579.894	-0.253064	0.0785571	-3.22141	0.00127563	0.0151462
P2rx4	ENSMUSG00000029470	protein_coding	18438	1564.18	-0.253407	0.0825008	-3.07157	0.00212938	0.0223755
Herc3	ENSMUSG00000029804	protein_coding	73998	705.956	-0.254345	0.0926392	-2.74555	0.00604104	0.0487564
Trim17	ENSMUSG00000036964	protein_coding	56631	465.049	-0.256893	0.0902523	-2.84638	0.00442193	0.0388648
Etv5	ENSMUSG00000013089	protein_coding	104156	1802.65	-0.257148	0.0870105	-2.95537	0.00312295	0.0299768
Polr3b	ENSMUSG00000034453	protein_coding	70428	1004.08	-0.259237	0.0681086	-3.80623	0.000141104	0.00251398
Uggt1	ENSMUSG00000037470	protein_coding	320011	6391.94	-0.26113	0.066775	-3.91059	9.20707e-05	0.00180611
Igf2r	ENSMUSG00000023830	protein_coding	16004	4841.3	-0.262299	0.0863942	-3.03607	0.00239681	0.0246401
Gnl2	ENSMUSG00000028869	protein_coding	230737	3110.51	-0.262635	0.0657652	-3.99353	6.50967e-05	0.00138167
Eif4g3	ENSMUSG00000028760	protein_coding	230861	4321.47	-0.262715	0.0496958	-5.28646	1.24706e-07	6.41785e-06
Nfil3	ENSMUSG00000056749	protein_coding	18030	1038.79	-0.262739	0.0905149	-2.90271	0.00369945	0.0340936
Kansl3	ENSMUSG00000010453	protein_coding	226976	4223.99	-0.263013	0.06181	-4.25518	2.08883e-05	0.000528737
H6pd	ENSMUSG00000028980	protein_coding	100198	2559.31	-0.263659	0.0631961	-4.17208	3.0183e-05	0.000720261
Apol9b	ENSMUSG00000068246	protein_coding	NA	4214.51	-0.263939	0.0943694	-2.79687	0.00516001	0.0436023
mt-Ta	ENSMUSG00000064347	Mt_tRNA	NA	1387.5	-0.264245	0.0930643	-2.83938	0.00452018	0.0395048
Tes	ENSMUSG00000029552	protein_coding	21753	15931.3	-0.264405	0.0707908	-3.73502	0.000187703	0.00318164
Asb13	ENSMUSG00000033781	protein_coding	NA	478.37	-0.26462	0.0828827	-3.19271	0.00140946	0.0163824
Naip2	ENSMUSG00000078945	protein_coding	17948	448.295	-0.264846	0.0961022	-2.75588	0.00585339	0.0476243
Txnrd3	ENSMUSG00000000811	protein_coding	NA	594.165	-0.264869	0.0941149	-2.81431	0.00488814	0.0420115
Tspan14	ENSMUSG00000037824	protein_coding	52588	1381.2	-0.265461	0.0546509	-4.8574	1.18939e-06	4.4178e-05
Tmem131l	ENSMUSG00000033767	protein_coding	229473	1352.53	-0.265602	0.0675752	-3.93047	8.47786e-05	0.00169418
Mras	ENSMUSG00000032470	protein_coding	17532	2189.19	-0.26591	0.051129	-5.20077	1.98467e-07	9.47208e-06
Sqor	ENSMUSG00000005803	protein_coding	59010	1903.98	-0.266942	0.060607	-4.40448	1.06037e-05	0.000291885
Peg13	ENSMUSG00000106847	sense_intronic	NA	520.002	-0.268608	0.0889131	-3.02102	0.00251925	0.0255865
Trim8	ENSMUSG00000025034	protein_coding	93679	4608.7	-0.269137	0.0699178	-3.84934	0.000118436	0.00221401
Tead4	ENSMUSG00000030353	protein_coding	21679	995.129	-0.270944	0.0766727	-3.53377	0.000409678	0.00602908
Adar	ENSMUSG00000027951	protein_coding	56417	3025.53	-0.273802	0.0528869	-5.17712	2.25332e-07	1.03435e-05
Cplx2	ENSMUSG00000025867	protein_coding	12890	749.623	-0.274559	0.0867465	-3.16507	0.00155044	0.0174281
Zmiz1	ENSMUSG00000007817	protein_coding	328365	11361.2	-0.276653	0.0845841	-3.27075	0.00107264	0.0132326
Parp12	ENSMUSG00000038507	protein_coding	243771	1225.83	-0.277283	0.0819943	-3.38173	0.000720301	0.00955517
Malsu1	ENSMUSG00000029815	protein_coding	75593	55896.5	-0.278773	0.0463553	-6.01384	1.81181e-09	1.50275e-07
Trmt6	ENSMUSG00000037376	protein_coding	66926	1153.65	-0.279064	0.0702892	-3.97022	7.18052e-05	0.00148601
Fkbp5	ENSMUSG00000024222	protein_coding	14229	1198.53	-0.280246	0.0673602	-4.16042	3.17668e-05	0.000753843
Gm5113	ENSMUSG00000066647	transcribed_unprocessed_pseudogene	NA	328.635	-0.28074	0.0998998	-2.81022	0.00495079	0.0423794
Knop1	ENSMUSG00000030980	protein_coding	66356	3016.8	-0.281041	0.061989	-4.53373	5.79524e-06	0.000173309
Gm13068	ENSMUSG00000085403	antisense	NA	453.932	-0.282045	0.0996608	-2.83005	0.00465414	0.0404234
Chst1	ENSMUSG00000027221	protein_coding	NA	1671.55	-0.283286	0.0988356	-2.86624	0.00415383	0.0370226
Dennd6b	ENSMUSG00000015377	protein_coding	NA	684.672	-0.28519	0.068829	-4.14346	3.42103e-05	0.000800708
Bst2	ENSMUSG00000046718	protein_coding	NA	7225.89	-0.286417	0.094812	-3.02089	0.00252032	0.0255865
Arhgap18	ENSMUSG00000039031	protein_coding	73910	638.656	-0.286719	0.104781	-2.73636	0.00621232	0.0498093
Pmepa1	ENSMUSG00000038400	protein_coding	65112	7973.87	-0.288579	0.073725	-3.91427	9.06788e-05	0.00178907
Grn	ENSMUSG00000034708	protein_coding	NA	20483.5	-0.29194	0.0707988	-4.12351	3.7314e-05	0.000861551
Dpf2	ENSMUSG00000024826	protein_coding	19708	5374.34	-0.292146	0.0638745	-4.57375	4.79061e-06	0.000148015
Gas2	ENSMUSG00000030498	protein_coding	14453	484.146	-0.29378	0.0792946	-3.70492	0.00021146	0.00350273
Pus3	ENSMUSG00000032103	protein_coding	NA	556.904	-0.294096	0.0916963	-3.20728	0.00133996	0.01576
Sema4c	ENSMUSG00000026121	protein_coding	NA	1385.4	-0.294827	0.0751775	-3.92174	8.79107e-05	0.00175063
Atmin	ENSMUSG00000047388	protein_coding	234776	938.943	-0.295057	0.0776454	-3.80006	0.000144662	0.00255869
Zcchc4	ENSMUSG00000029179	protein_coding	78796	1053.73	-0.295206	0.0762033	-3.87393	0.000107095	0.00203767
Tyro3	ENSMUSG00000027298	protein_coding	22174	923.396	-0.295257	0.0693256	-4.25899	2.05357e-05	0.000520582
Alkbh7	ENSMUSG00000002661	protein_coding	NA	344.067	-0.295429	0.105677	-2.79558	0.00518061	0.0437548
Usp11	ENSMUSG00000031066	protein_coding	NA	1443.13	-0.297084	0.0768973	-3.86339	0.000111825	0.00210607
Stx16	ENSMUSG00000027522	protein_coding	228960	5145.45	-0.299122	0.0683587	-4.37577	1.21003e-05	0.000329671
Micall1	ENSMUSG00000033039	protein_coding	27008	4692.42	-0.300053	0.0577817	-5.19287	2.07078e-07	9.69354e-06
Pdgfra	ENSMUSG00000029231	protein_coding	18595	4832.76	-0.300701	0.0949127	-3.16818	0.00153394	0.0173111
Stom	ENSMUSG00000026880	protein_coding	13830	2483.47	-0.300736	0.0822852	-3.65481	0.000257377	0.00414082
Sgf29	ENSMUSG00000030714	protein_coding	75565	777.701	-0.301664	0.0874014	-3.45148	0.000557521	0.00774456
Eif2ak2	ENSMUSG00000024079	protein_coding	19106	2135.01	-0.302257	0.0920856	-3.28235	0.00102944	0.0127828
Hhipl1	ENSMUSG00000021260	protein_coding	214305	938.035	-0.305663	0.0877332	-3.484	0.000493974	0.00699838
Dcp1b	ENSMUSG00000041477	protein_coding	319618	270.784	-0.305767	0.102758	-2.9756	0.00292413	0.0285782
Gm11626	ENSMUSG00000086347	antisense	NA	400.791	-0.305912	0.10409	-2.93891	0.00329366	0.0311603
Ovca2	ENSMUSG00000038268	protein_coding	246257	1238.24	-0.306001	0.0616034	-4.96727	6.79017e-07	2.70164e-05
Slc25a33	ENSMUSG00000028982	protein_coding	70556	1184.69	-0.306313	0.0939439	-3.26059	0.00111181	0.013634
Zfc3h1	ENSMUSG00000034163	protein_coding	216345	5500.36	-0.307801	0.09904	-3.10785	0.00188456	0.0203024
Mcfd2	ENSMUSG00000024150	protein_coding	193813	7084.97	-0.307914	0.0569487	-5.40687	6.4136e-08	3.68966e-06
Mmp19	ENSMUSG00000025355	protein_coding	58223	2114.24	-0.309704	0.0530227	-5.84097	5.18975e-09	3.8553e-07
Wnt10b	ENSMUSG00000022996	protein_coding	NA	4718.07	-0.309863	0.0622602	-4.9769	6.46122e-07	2.59147e-05
Gcat	ENSMUSG00000006378	protein_coding	26912	758.226	-0.313695	0.0816195	-3.84339	0.000121347	0.00225117
Tmem186	ENSMUSG00000043140	protein_coding	NA	364.818	-0.318545	0.0854395	-3.72832	0.000192762	0.00324806
4930471E19Rik	ENSMUSG00000112716	lincRNA	NA	531.587	-0.319992	0.115714	-2.76537	0.00568576	0.0466835
Slc35d1	ENSMUSG00000028521	protein_coding	242585	846.575	-0.320503	0.0949983	-3.37378	0.000741438	0.00973728
Fam20c	ENSMUSG00000025854	protein_coding	80752	8713.46	-0.321573	0.0830461	-3.87222	0.000107848	0.00204743
Nemp2	ENSMUSG00000043015	protein_coding	227094	198.041	-0.321602	0.114574	-2.80693	0.00500167	0.0426768
Rhoc	ENSMUSG00000002233	protein_coding	NA	7744.84	-0.321623	0.0777587	-4.13616	3.53164e-05	0.000821617
Rcc2	ENSMUSG00000040945	protein_coding	108911	10937.6	-0.321626	0.0648485	-4.95966	7.06173e-07	2.79946e-05
Sh3kbp1	ENSMUSG00000040990	protein_coding	NA	5516.53	-0.32296	0.0553968	-5.82995	5.54456e-09	4.08338e-07
Sphk1	ENSMUSG00000061878	protein_coding	NA	575.111	-0.324046	0.0777702	-4.16671	3.09023e-05	0.000735372
Trip12	ENSMUSG00000026219	protein_coding	14897	6465.96	-0.324495	0.0816931	-3.97212	7.12348e-05	0.00148232
Lgr6	ENSMUSG00000042793	protein_coding	329252	4314.92	-0.324727	0.073263	-4.43234	9.32157e-06	0.000260668
Med22	ENSMUSG00000015776	protein_coding	NA	1304.73	-0.327636	0.0727082	-4.50617	6.60082e-06	0.000194787
Ctsc	ENSMUSG00000030560	protein_coding	13032	1157.03	-0.328073	0.0855437	-3.83515	0.000125486	0.00231539
Slc22a4	ENSMUSG00000020334	protein_coding	30805	1208.86	-0.329412	0.0901696	-3.65325	0.00025894	0.00416204
A530040E14Rik	ENSMUSG00000072109	antisense	NA	639.855	-0.329433	0.101073	-3.25935	0.00111668	0.0136674
NA	NA	NA	NA	1510.58	-0.334838	0.114464	-2.92528	0.00344149	0.0322596
A530017D24Rik	ENSMUSG00000072847	lincRNA	NA	502.688	-0.337016	0.103491	-3.25649	0.00112797	0.0137464
Dagla	ENSMUSG00000035735	protein_coding	269060	1291.5	-0.337871	0.0784539	-4.30661	1.65773e-05	0.000432624
Acaa1a	ENSMUSG00000036138	protein_coding	113868	1710.98	-0.338583	0.0816822	-4.14512	3.39631e-05	0.000798202
Slc25a38	ENSMUSG00000032519	protein_coding	208638	654.822	-0.339875	0.0948615	-3.58286	0.000339854	0.00518923
Nudt13	ENSMUSG00000021809	protein_coding	67725	959.631	-0.341497	0.078547	-4.34767	1.37589e-05	0.000365605
Snrnp70	ENSMUSG00000063511	protein_coding	20637	16796	-0.341933	0.0537478	-6.3618	1.99403e-10	2.00412e-08
Ank	ENSMUSG00000022265	protein_coding	11732	3778.53	-0.342156	0.0817416	-4.18583	2.84132e-05	0.000688606
Ifit1	ENSMUSG00000034459	protein_coding	15957	1200.81	-0.34413	0.122914	-2.79977	0.00511392	0.0432985
Ltbp4	ENSMUSG00000040488	protein_coding	108075	2597.81	-0.344327	0.104816	-3.28507	0.00101958	0.012697
Csdc2	ENSMUSG00000042109	protein_coding	105859	294.04	-0.346021	0.109779	-3.15197	0.00162174	0.018072
Lgals3bp	ENSMUSG00000033880	protein_coding	19039	4599.79	-0.347874	0.0966222	-3.60035	0.000317789	0.00491888
Epg5	ENSMUSG00000039840	protein_coding	100502841	1889.12	-0.348061	0.0983771	-3.53803	0.000403123	0.00596859
Apol9a	ENSMUSG00000057346	protein_coding	NA	4245.52	-0.34822	0.101669	-3.42506	0.000614672	0.0084153
Ppifos	ENSMUSG00000114922	antisense	NA	217.039	-0.348724	0.111347	-3.13186	0.001737	0.0190014
Ppm1l	ENSMUSG00000027784	protein_coding	242083	3178.36	-0.348996	0.074833	-4.66366	3.1063e-06	0.000101287
Tle1	ENSMUSG00000008305	protein_coding	21885	5053.83	-0.350094	0.0675997	-5.17893	2.23157e-07	1.02909e-05
Nbeal2	ENSMUSG00000056724	protein_coding	235627	426.982	-0.352583	0.0991513	-3.55601	0.000376526	0.00565173
H2-T22	ENSMUSG00000056116	protein_coding	15039	1774.02	-0.355079	0.0639418	-5.55316	2.80548e-08	1.74307e-06
H2-T22	ENSMUSG00000056116	protein_coding	15051	1774.02	-0.355079	0.0639418	-5.55316	2.80548e-08	1.74307e-06
Gm29100	ENSMUSG00000100980	antisense	NA	682.803	-0.3552	0.118332	-3.00173	0.00268451	0.0267918
Mllt11	ENSMUSG00000053192	protein_coding	56772	1248.32	-0.356119	0.0816968	-4.35903	1.30638e-05	0.000347676
Oas3	ENSMUSG00000032661	protein_coding	246727	910.987	-0.359231	0.127021	-2.82812	0.0046822	0.0406298
Wnt5a	ENSMUSG00000021994	protein_coding	22418	685.095	-0.359476	0.0881885	-4.07622	4.57738e-05	0.00102101
Cyb5rl	ENSMUSG00000028621	protein_coding	230582	318.907	-0.359862	0.10065	-3.57539	0.000349702	0.00531112
Lmo4	ENSMUSG00000028266	protein_coding	16911	2337.94	-0.36362	0.0740735	-4.9089	9.15868e-07	3.48519e-05
Kmt2d	ENSMUSG00000048154	protein_coding	381022	12712.7	-0.36383	0.0826065	-4.40438	1.06087e-05	0.000291885
Znfx1	ENSMUSG00000039501	protein_coding	98999	2825.31	-0.366189	0.0869957	-4.20927	2.56192e-05	0.000633474
Dpy19l3	ENSMUSG00000043671	protein_coding	233115	1149.01	-0.36663	0.0845433	-4.3366	1.44703e-05	0.000382724
Adamts14	ENSMUSG00000059901	protein_coding	237360	930.728	-0.366757	0.085699	-4.27959	1.87234e-05	0.00048179
Hapln4	ENSMUSG00000007594	protein_coding	NA	557.462	-0.367243	0.102297	-3.58998	0.000330701	0.00508125
Ubr4	ENSMUSG00000066036	protein_coding	69116	13732.6	-0.367606	0.0779764	-4.71432	2.42518e-06	8.25432e-05
NA	NA	NA	NA	263.063	-0.368739	0.120093	-3.07043	0.00213748	0.0224331
Gpat3	ENSMUSG00000029314	protein_coding	231510	1342.98	-0.369362	0.095611	-3.86318	0.000111923	0.00210607
Lyrm9	ENSMUSG00000072640	protein_coding	NA	325.766	-0.370855	0.113699	-3.26173	0.00110736	0.0135922
NA	NA	NA	NA	330.179	-0.373666	0.115163	-3.24466	0.00117589	0.0141891
Fbxo31	ENSMUSG00000052934	protein_coding	76454	2444.61	-0.374472	0.073236	-5.11322	3.16712e-07	1.36996e-05
Pcdh19	ENSMUSG00000051323	protein_coding	NA	763.606	-0.376279	0.0943212	-3.98934	6.62578e-05	0.00140109
Epn2	ENSMUSG00000001036	protein_coding	13855	5579.39	-0.37692	0.0644968	-5.84401	5.0959e-09	3.80212e-07
Tmem80	ENSMUSG00000025505	protein_coding	71448	390.808	-0.378381	0.13595	-2.78324	0.00538197	0.0448787
Letm2	ENSMUSG00000037363	protein_coding	270035	220.845	-0.37883	0.113991	-3.32332	0.000889517	0.0112663
Twist2	ENSMUSG00000007805	protein_coding	13345	1117.28	-0.379363	0.112191	-3.38139	0.000721211	0.00955983
Ifi35	ENSMUSG00000010358	protein_coding	70110	1339.1	-0.382994	0.0915822	-4.18197	2.88989e-05	0.000694468
Dffb	ENSMUSG00000029027	protein_coding	NA	239.954	-0.387301	0.111033	-3.48817	0.000486346	0.00691899
Farp1	ENSMUSG00000025555	protein_coding	223254	345.073	-0.389392	0.102115	-3.81328	0.000137133	0.00246118
Arhgap28	ENSMUSG00000024043	protein_coding	268970	989.613	-0.389732	0.082221	-4.74006	2.13659e-06	7.38983e-05
Maml3	ENSMUSG00000061143	protein_coding	433586	535.519	-0.390477	0.104284	-3.74434	0.000180865	0.00308718
NA	NA	NA	NA	6968.63	-0.390631	0.126054	-3.09891	0.00194231	0.0207804
Capn5	ENSMUSG00000035547	protein_coding	12337	2428.87	-0.390645	0.0977351	-3.99697	6.41573e-05	0.00136512
Ifitm5	ENSMUSG00000025489	protein_coding	73835	14484.6	-0.393216	0.087621	-4.48769	7.19983e-06	0.000209211
Tnfrsf14	ENSMUSG00000042333	protein_coding	NA	235.521	-0.3953	0.141066	-2.80224	0.00507497	0.0430969
Zadh2	ENSMUSG00000049090	protein_coding	225791	2620.71	-0.39818	0.0596568	-6.67451	2.48053e-11	3.21079e-09
Chka	ENSMUSG00000024843	protein_coding	12660	6873.18	-0.398288	0.0746586	-5.33479	9.56532e-08	5.10729e-06
Helz2	ENSMUSG00000027580	protein_coding	NA	3059.74	-0.398856	0.128658	-3.10012	0.00193443	0.0207091
Mylip	ENSMUSG00000038175	protein_coding	218203	932.705	-0.401864	0.116091	-3.46162	0.000536939	0.00750134
Tfcp2	ENSMUSG00000009733	protein_coding	21422	1581.96	-0.403819	0.0512692	-7.87645	3.36807e-15	8.99169e-13
Gm41442	ENSMUSG00000116946	lincRNA	NA	190.66	-0.404554	0.122104	-3.3132	0.000922346	0.0116218
Amigo2	ENSMUSG00000048218	protein_coding	NA	408.632	-0.405797	0.0877043	-4.62687	3.71227e-06	0.000117677
Tgtp2	ENSMUSG00000078921	protein_coding	NA	198	-0.406268	0.112356	-3.61588	0.000299325	0.00468769
Plxna2	ENSMUSG00000026640	protein_coding	18845	555.075	-0.408171	0.144233	-2.82994	0.00465566	0.0404234
Xaf1	ENSMUSG00000040483	protein_coding	NA	1028.64	-0.410611	0.103637	-3.962	7.43256e-05	0.00152452
Tpcn1	ENSMUSG00000032741	protein_coding	252972	1682.57	-0.410633	0.0796137	-5.15781	2.49849e-07	1.12045e-05
Irgm2	ENSMUSG00000069874	protein_coding	54396	1105.75	-0.414932	0.107375	-3.86434	0.00011139	0.00210066
Itfg2	ENSMUSG00000001518	protein_coding	101142	817.255	-0.416962	0.0751064	-5.55162	2.8304e-08	1.75218e-06
Tanc1	ENSMUSG00000035168	protein_coding	66860	3944.15	-0.418236	0.103487	-4.04145	5.3121e-05	0.00116065
Lpar1	ENSMUSG00000038668	protein_coding	14745	5693.39	-0.422143	0.0635858	-6.63895	3.15929e-11	3.99849e-09
Rassf8	ENSMUSG00000030259	protein_coding	71323	1307.25	-0.423338	0.120344	-3.51772	0.000435265	0.00633822
NA	NA	NA	NA	510.563	-0.423762	0.115534	-3.66785	0.000244597	0.00396884
Jade2	ENSMUSG00000020387	protein_coding	76901	1685.6	-0.424517	0.099916	-4.24874	2.1498e-05	0.000543309
Anpep	ENSMUSG00000039062	protein_coding	16790	5968.01	-0.428648	0.0781751	-5.48318	4.17745e-08	2.46975e-06
Stat1	ENSMUSG00000026104	protein_coding	20846	1672.54	-0.429992	0.130264	-3.30094	0.000963625	0.0120796
5430430B14Rik	ENSMUSG00000109953	TEC	NA	681.592	-0.430121	0.14175	-3.03437	0.00241039	0.0247567
Nmi	ENSMUSG00000026946	protein_coding	64685	124.68	-0.432105	0.127953	-3.37705	0.000732667	0.00965923
Nedd9	ENSMUSG00000021365	protein_coding	18003	954.46	-0.433632	0.0763431	-5.68004	1.34664e-08	9.31529e-07
Cdk20	ENSMUSG00000021483	protein_coding	105278	1110.29	-0.434118	0.0811063	-5.35246	8.67682e-08	4.73649e-06
Syt7	ENSMUSG00000024743	protein_coding	54525	13289.6	-0.435946	0.0811921	-5.36931	7.90392e-08	4.40854e-06
Caprin2	ENSMUSG00000030309	protein_coding	232560	376.495	-0.436089	0.0946109	-4.60929	4.04043e-06	0.000127136
Ppp3ca	ENSMUSG00000028161	protein_coding	19055	4545.29	-0.437696	0.07927	-5.52159	3.35951e-08	2.04273e-06
Csad	ENSMUSG00000023044	protein_coding	246277	1569.61	-0.440803	0.0931795	-4.73068	2.23768e-06	7.69277e-05
Il34	ENSMUSG00000031750	protein_coding	76527	930.856	-0.44091	0.0819759	-5.37853	7.50961e-08	4.26277e-06
Ube2l6	ENSMUSG00000027078	protein_coding	56791	472.099	-0.444109	0.082581	-5.37786	7.53774e-08	4.26456e-06
Adgra2	ENSMUSG00000031486	protein_coding	78560	2748.08	-0.444322	0.0830028	-5.3531	8.64615e-08	4.73488e-06
Peak1	ENSMUSG00000074305	protein_coding	244895	6952.82	-0.445226	0.0739326	-6.02206	1.72213e-09	1.43533e-07
Rpl15-ps6	ENSMUSG00000057262	processed_pseudogene	NA	122.251	-0.445936	0.161697	-2.75785	0.00581823	0.047406
Ctsl	ENSMUSG00000021477	protein_coding	13039	64271.2	-0.44948	0.063106	-7.12263	1.05889e-12	1.75652e-10
Fn1	ENSMUSG00000026193	protein_coding	14268	151263	-0.449548	0.0831114	-5.40898	6.33858e-08	3.65882e-06
Mtrr	ENSMUSG00000034617	protein_coding	210009	710.333	-0.450493	0.0804874	-5.59706	2.18014e-08	1.40566e-06
Dbndd1	ENSMUSG00000031970	protein_coding	NA	289.674	-0.451403	0.123026	-3.66917	0.000243336	0.00395212
Sgsm2	ENSMUSG00000038351	protein_coding	97761	1500.57	-0.452821	0.0571015	-7.93012	2.18943e-15	6.02034e-13
Parp14	ENSMUSG00000034422	protein_coding	547253	670.068	-0.453591	0.120934	-3.75074	0.000176312	0.00301851
NA	NA	NA	NA	399.135	-0.45569	0.0845997	-5.38643	7.18717e-08	4.09333e-06
NA	NA	NA	NA	251.809	-0.462958	0.113517	-4.0783	4.53669e-05	0.00101458
Chic1	ENSMUSG00000031327	protein_coding	NA	1222.72	-0.466062	0.0992813	-4.69436	2.67437e-06	8.94214e-05
Mterf4	ENSMUSG00000026273	protein_coding	NA	1324.11	-0.466997	0.125132	-3.73204	0.000189936	0.00320677
Samd10	ENSMUSG00000038605	protein_coding	NA	176.099	-0.467119	0.166504	-2.80545	0.00502464	0.0427804
Mdn1	ENSMUSG00000058006	protein_coding	100019	4325.75	-0.468623	0.0950208	-4.93179	8.14801e-07	3.17123e-05
NA	NA	NA	NA	6322.82	-0.473219	0.167858	-2.81917	0.00481487	0.041563
Csgalnact1	ENSMUSG00000036356	protein_coding	234356	548.445	-0.473597	0.101709	-4.65642	3.21762e-06	0.000104319
Pcdh1	ENSMUSG00000051375	protein_coding	NA	197.1	-0.480108	0.136743	-3.51103	0.000446378	0.00644157
Cnnm4	ENSMUSG00000037408	protein_coding	94220	665.887	-0.481414	0.099774	-4.82505	1.3997e-06	5.0992e-05
Sema4b	ENSMUSG00000030539	protein_coding	20352	2638.21	-0.483863	0.106453	-4.54533	5.48498e-06	0.000165276
Dock8	ENSMUSG00000052085	protein_coding	76088	3007.34	-0.489836	0.113324	-4.32243	1.5432e-05	0.000406272
Phf11d	ENSMUSG00000068245	protein_coding	NA	460.036	-0.490594	0.108901	-4.50496	6.63865e-06	0.000195566
Gm7609	ENSMUSG00000079457	protein_coding	665378	507.225	-0.49412	0.111045	-4.44973	8.5979e-06	0.000243706
Osbpl6	ENSMUSG00000042359	protein_coding	99031	303.163	-0.495386	0.159708	-3.10183	0.00192328	0.0206156
Slit3	ENSMUSG00000056427	protein_coding	20564	795.985	-0.497497	0.129378	-3.8453	0.000120407	0.00223616
Syne2	ENSMUSG00000063450	protein_coding	319565	3255.98	-0.502993	0.116621	-4.31304	1.61022e-05	0.000423264
Cp	ENSMUSG00000003617	protein_coding	12870	3977.22	-0.505026	0.12109	-4.17066	3.03722e-05	0.000723766
NA	NA	NA	NA	238.229	-0.505464	0.119194	-4.24068	2.22844e-05	0.000559107
Rin2	ENSMUSG00000001768	protein_coding	74030	5027.47	-0.50566	0.0944919	-5.35136	8.72972e-08	4.75019e-06
Stat2	ENSMUSG00000040033	protein_coding	20847	3367.21	-0.505781	0.09627	-5.25378	1.49011e-07	7.42275e-06
Tmem65	ENSMUSG00000062373	protein_coding	74868	5111.14	-0.505882	0.0680182	-7.43746	1.02642e-13	2.0158e-11
Gm5182	ENSMUSG00000111942	processed_pseudogene	NA	223.419	-0.506099	0.174248	-2.90447	0.00367879	0.0339578
Setbp1	ENSMUSG00000024548	protein_coding	240427	758.471	-0.506713	0.141907	-3.57075	0.000355963	0.00539183
Mir29b-2	ENSMUSG00000065412	miRNA	NA	151.929	-0.510532	0.152964	-3.3376	0.000845048	0.0108316
Jag1	ENSMUSG00000027276	protein_coding	16449	1030.75	-0.511577	0.13891	-3.6828	0.000230689	0.00378268
D930007P13Rik	ENSMUSG00000097003	lincRNA	NA	443.951	-0.512277	0.105351	-4.86256	1.1588e-06	4.31357e-05
Etv1	ENSMUSG00000004151	protein_coding	14009	584.787	-0.514508	0.122946	-4.18483	2.85377e-05	0.000689058
Robo1	ENSMUSG00000022883	protein_coding	19876	227.828	-0.51594	0.174174	-2.9622	0.00305445	0.0295183
Sema7a	ENSMUSG00000038264	protein_coding	20361	585.056	-0.516469	0.17207	-3.00151	0.00268647	0.0267957
Hap1	ENSMUSG00000006930	protein_coding	NA	241.141	-0.518553	0.109409	-4.73958	2.14158e-06	7.39213e-05
NA	NA	NA	NA	20175.3	-0.522967	0.14472	-3.61365	0.000301911	0.00472026
NA	NA	NA	NA	15346.9	-0.529327	0.146145	-3.62193	0.000292415	0.00460055
Ern1	ENSMUSG00000020715	protein_coding	78943	10312.8	-0.530954	0.13428	-3.95408	7.68296e-05	0.00156275
Magef1	ENSMUSG00000116632	transcribed_processed_pseudogene	NA	242.854	-0.533787	0.116525	-4.58088	4.63016e-06	0.000143838
Hsd17b4	ENSMUSG00000024507	protein_coding	15488	1238.58	-0.53711	0.0682598	-7.86861	3.58608e-15	9.42644e-13
Chst15	ENSMUSG00000030930	protein_coding	77590	2348.15	-0.539789	0.108374	-4.9808	6.33225e-07	2.54571e-05
Aig1	ENSMUSG00000019806	protein_coding	66253	617.045	-0.542893	0.0995103	-5.45564	4.87961e-08	2.87493e-06
NA	NA	NA	NA	113.526	-0.544211	0.197805	-2.75125	0.00593687	0.0481659
Gm20528	ENSMUSG00000092220	processed_transcript	NA	663.649	-0.547906	0.104789	-5.22864	1.70759e-07	8.26512e-06
Nrip1	ENSMUSG00000048490	protein_coding	268903	2726.37	-0.550068	0.17015	-3.23284	0.00122567	0.0146651
B2m	ENSMUSG00000060802	protein_coding	12010	23941.4	-0.55047	0.0668382	-8.23586	1.78268e-16	5.74694e-14
Nlrc5	ENSMUSG00000074151	protein_coding	434341	1133.67	-0.552763	0.107678	-5.13349	2.84419e-07	1.24602e-05
Cyp7b1	ENSMUSG00000039519	protein_coding	13123	245.333	-0.554093	0.109432	-5.06336	4.11933e-07	1.73357e-05
Slc16a1	ENSMUSG00000032902	protein_coding	20501	2812.81	-0.555904	0.075944	-7.31992	2.48121e-13	4.46252e-11
Aldh3a1	ENSMUSG00000019102	protein_coding	NA	17841.8	-0.557489	0.105547	-5.28188	1.27868e-07	6.54119e-06
Spp1	ENSMUSG00000029304	protein_coding	20750	104073	-0.565595	0.0841268	-6.72312	1.7787e-11	2.37429e-09
NA	NA	NA	NA	437.147	-0.566154	0.135234	-4.18648	2.83318e-05	0.000687609
Cd46	ENSMUSG00000016493	protein_coding	17221	211.356	-0.574753	0.132583	-4.33505	1.45725e-05	0.000384831
Mx2	ENSMUSG00000023341	polymorphic_pseudogene	17858	246.76	-0.577411	0.132003	-4.37421	1.21874e-05	0.000330006
Trim30a	ENSMUSG00000030921	protein_coding	20128	683.06	-0.578466	0.0899269	-6.43262	1.25425e-10	1.38259e-08
NA	NA	NA	NA	139.328	-0.585349	0.143062	-4.09158	4.28448e-05	0.000967036
NA	NA	NA	NA	168.295	-0.587523	0.169646	-3.46323	0.000533733	0.00746876
Ugt1a6a	ENSMUSG00000054545	protein_coding	94284	2374.89	-0.58824	0.0848712	-6.93097	4.17956e-12	6.20973e-10
NA	NA	NA	NA	1027.39	-0.588402	0.162509	-3.62074	0.00029376	0.00461322
Masp2	ENSMUSG00000028979	protein_coding	17175	662.082	-0.592878	0.092992	-6.37558	1.82267e-10	1.91056e-08
Plat	ENSMUSG00000031538	protein_coding	18791	315.155	-0.593002	0.116648	-5.0837	3.70143e-07	1.59301e-05
Sp100	ENSMUSG00000026222	protein_coding	20684	706.197	-0.593261	0.100571	-5.8989	3.65935e-09	2.80375e-07
NA	NA	NA	NA	332.243	-0.59451	0.191879	-3.09837	0.0019459	0.0208058
Efnb2	ENSMUSG00000001300	protein_coding	13642	347.264	-0.597786	0.114638	-5.21453	1.84283e-07	8.81977e-06
Il6ra	ENSMUSG00000027947	protein_coding	16194	704.29	-0.599265	0.141332	-4.24013	2.23386e-05	0.000559645
Dhx58os	ENSMUSG00000085604	antisense	NA	48.7253	-0.600587	0.186638	-3.21793	0.00129119	0.0153097
NA	NA	NA	NA	121.46	-0.600694	0.160925	-3.73275	0.000189401	0.00320089
Mmp13	ENSMUSG00000050578	protein_coding	17386	564.634	-0.602474	0.153761	-3.91825	8.91956e-05	0.00176593
2810013P06Rik	ENSMUSG00000099881	bidirectional_promoter_lncRNA	NA	447.39	-0.608239	0.102138	-5.95504	2.60001e-09	2.09375e-07
NA	NA	NA	NA	268.118	-0.616203	0.138578	-4.44662	8.72317e-06	0.000246086
Gm49085	ENSMUSG00000115249	antisense	NA	57.6736	-0.622101	0.207054	-3.00453	0.0026599	0.0266528
Oas1b	ENSMUSG00000029605	polymorphic_pseudogene	NA	299.151	-0.630039	0.111328	-5.6593	1.51991e-08	1.02645e-06
Phf11b	ENSMUSG00000091649	protein_coding	236451	80.8406	-0.63068	0.158857	-3.97011	7.1839e-05	0.00148601
Igsf11	ENSMUSG00000022790	protein_coding	207683	129.832	-0.631244	0.168935	-3.7366	0.000186525	0.00316482
Iigp1	ENSMUSG00000054072	protein_coding	60440	175.947	-0.634954	0.139254	-4.55969	5.12303e-06	0.000156307
Ifih1	ENSMUSG00000026896	protein_coding	71586	587.72	-0.63813	0.11429	-5.58342	2.35832e-08	1.50352e-06
Gm48488	ENSMUSG00000114433	lincRNA	NA	115.449	-0.640063	0.209226	-3.05919	0.00221933	0.0231357
Nupr1	ENSMUSG00000030717	protein_coding	56312	5311.29	-0.640349	0.100499	-6.37171	1.86934e-10	1.93573e-08
Trim30d	ENSMUSG00000057596	protein_coding	209387	370.485	-0.643646	0.113757	-5.65807	1.53087e-08	1.02978e-06
Oasl1	ENSMUSG00000041827	protein_coding	NA	214.58	-0.644596	0.131389	-4.90601	9.29475e-07	3.52911e-05
Map3k6	ENSMUSG00000028862	protein_coding	NA	529.311	-0.650653	0.105374	-6.1747	6.62897e-10	5.96119e-08
Zfp422-ps	ENSMUSG00000091515	unprocessed_pseudogene	NA	102.311	-0.650854	0.203963	-3.19104	0.0014176	0.0164211
Card10	ENSMUSG00000033170	protein_coding	105844	420.697	-0.651952	0.0975414	-6.68384	2.32753e-11	3.03574e-09
NA	NA	NA	NA	97.3993	-0.652565	0.178037	-3.66534	0.000247013	0.00400041
NA	NA	NA	NA	101.946	-0.655291	0.144166	-4.5454	5.48309e-06	0.000165276
Isg15	ENSMUSG00000035692	protein_coding	NA	1697.26	-0.656809	0.0986737	-6.65637	2.80672e-11	3.57877e-09
Rnf213	ENSMUSG00000070327	protein_coding	672511	7319.63	-0.657714	0.0883477	-7.4446	9.72357e-14	1.93183e-11
Greb1	ENSMUSG00000036523	protein_coding	268527	83.3623	-0.661816	0.226539	-2.92142	0.00348442	0.0325149
Gm4951	ENSMUSG00000073555	protein_coding	240327	102.315	-0.668377	0.157905	-4.23278	2.30825e-05	0.00057659
Fam210b	ENSMUSG00000027495	protein_coding	NA	2198.12	-0.67156	0.0568094	-11.8213	3.02995e-32	7.39567e-29
Agrn	ENSMUSG00000041936	protein_coding	NA	3393.89	-0.671614	0.0894181	-7.51094	5.87049e-14	1.19409e-11
Gprc5b	ENSMUSG00000008734	protein_coding	64297	1506.69	-0.679742	0.09156	-7.42401	1.13627e-13	2.20618e-11
Sox2	ENSMUSG00000074637	protein_coding	NA	1848.74	-0.684808	0.106268	-6.44417	1.16235e-10	1.31523e-08
H2-T23	ENSMUSG00000067212	protein_coding	NA	246.943	-0.686771	0.118414	-5.79974	6.64173e-09	4.82896e-07
Abcd2	ENSMUSG00000055782	protein_coding	26874	70.6276	-0.688017	0.194437	-3.5385	0.000402404	0.00596311
Dmtn	ENSMUSG00000022099	protein_coding	13829	77.8783	-0.697435	0.197237	-3.53602	0.0004062	0.0059882
Gm16277	ENSMUSG00000087002	antisense	NA	497.549	-0.697765	0.132694	-5.25847	1.45259e-07	7.32122e-06
NA	NA	NA	NA	167.805	-0.710486	0.15029	-4.72743	2.2738e-06	7.80122e-05
Iqck	ENSMUSG00000073856	protein_coding	434232	326.314	-0.710732	0.0926995	-7.66705	1.75996e-14	3.90528e-12
Pde10a	ENSMUSG00000023868	protein_coding	23984	163.15	-0.710922	0.171658	-4.14151	3.45032e-05	0.000805358
Ifi203	ENSMUSG00000039997	protein_coding	15950	1097.25	-0.714806	0.124973	-5.71969	1.06721e-08	7.41235e-07
Ifi203	ENSMUSG00000039997	protein_coding	102641031	1097.25	-0.714806	0.124973	-5.71969	1.06721e-08	7.41235e-07
Gm15821	ENSMUSG00000081512	macro_lncRNA	NA	281.333	-0.720403	0.125415	-5.74414	9.23884e-09	6.49608e-07
Fam50a	ENSMUSG00000001962	protein_coding	NA	2148.3	-0.724498	0.0933244	-7.76322	8.27983e-15	2.08043e-12
Arid5a	ENSMUSG00000037447	protein_coding	214855	785.075	-0.732188	0.105698	-6.92715	4.29392e-12	6.32465e-10
Sned1	ENSMUSG00000047793	protein_coding	208777	2093.28	-0.745007	0.212766	-3.50154	0.000462581	0.00664173
Gm43302	ENSMUSG00000079362	protein_coding	NA	359.948	-0.750861	0.144649	-5.19092	2.0926e-07	9.76891e-06
Gbp7	ENSMUSG00000040253	protein_coding	229900	304.897	-0.753337	0.160668	-4.68879	2.74819e-06	9.09991e-05
Gm12258	ENSMUSG00000072915	protein_coding	NA	155.503	-0.754179	0.151662	-4.97277	6.60026e-07	2.64103e-05
AW011738	ENSMUSG00000078349	processed_transcript	NA	575.979	-0.75423	0.111132	-6.78679	1.14656e-11	1.60575e-09
Dhx58	ENSMUSG00000017830	protein_coding	NA	362.414	-0.754557	0.115319	-6.54321	6.02118e-11	7.2963e-09
NA	NA	NA	NA	63.1848	-0.757055	0.239964	-3.15486	0.00160574	0.017967
NA	NA	NA	NA	795.242	-0.75732	0.185625	-4.07984	4.50669e-05	0.00100919
Gbp3	ENSMUSG00000028268	protein_coding	55932	622.496	-0.758195	0.106618	-7.11132	1.14942e-12	1.87038e-10
Oasl2	ENSMUSG00000029561	protein_coding	23962	1901.97	-0.763194	0.111103	-6.86927	6.45334e-12	9.42408e-10
Col4a6	ENSMUSG00000031273	protein_coding	NA	2179.45	-0.767265	0.12883	-5.95564	2.59061e-09	2.09375e-07
Adgrg6	ENSMUSG00000039116	protein_coding	215798	2937.47	-0.772648	0.147044	-5.25452	1.48407e-07	7.4143e-06
Usp18	ENSMUSG00000030107	protein_coding	24110	1135.87	-0.780138	0.0836603	-9.32507	1.10913e-20	6.31686e-18
NA	NA	NA	NA	54.1218	-0.780461	0.25895	-3.01395	0.00257871	0.0260094
Slfn8	ENSMUSG00000035208	protein_coding	276950	183.807	-0.787179	0.123215	-6.38866	1.6735e-10	1.77599e-08
Gm44148	ENSMUSG00000107736	lincRNA	NA	156.418	-0.801771	0.171916	-4.66372	3.1054e-06	0.000101287
Cth	ENSMUSG00000028179	protein_coding	107869	820.872	-0.8024	0.137883	-5.81942	5.90535e-09	4.31191e-07
Thoc7	ENSMUSG00000053453	protein_coding	66231	1142.16	-0.802749	0.0782643	-10.2569	1.10194e-24	1.04599e-21
Itgbl1	ENSMUSG00000032925	protein_coding	223272	107.811	-0.805559	0.18102	-4.45011	8.58257e-06	0.000243706
NA	NA	NA	NA	247.014	-0.810218	0.145088	-5.58434	2.34592e-08	1.50122e-06
Gm46212	ENSMUSG00000111888	antisense	NA	89.9327	-0.819309	0.215347	-3.80459	0.00014204	0.00252654
Bhlhe22	ENSMUSG00000025128	protein_coding	NA	154.587	-0.834919	0.160953	-5.18735	2.13313e-07	9.93097e-06
Tap2	ENSMUSG00000024339	protein_coding	21355	783.848	-0.837051	0.0783359	-10.6854	1.19124e-26	1.45383e-23
Gm47123	ENSMUSG00000113683	antisense	NA	300.696	-0.838659	0.139968	-5.99181	2.07516e-09	1.70462e-07
Rnf144a	ENSMUSG00000020642	protein_coding	108089	78.8229	-0.840544	0.203074	-4.1391	3.48675e-05	0.000812749
NA	NA	NA	NA	40.1605	-0.843877	0.264375	-3.19197	0.00141305	0.0164017
NA	NA	NA	NA	73.2601	-0.859115	0.208698	-4.11655	3.84582e-05	0.000883195
Vipr2	ENSMUSG00000011171	protein_coding	22355	810.613	-0.863928	0.10748	-8.03802	9.13033e-16	2.68967e-13
Dhrs3	ENSMUSG00000066026	protein_coding	20148	5292.91	-0.864883	0.0763826	-11.323	1.00914e-29	1.72421e-26
NA	NA	NA	NA	407.312	-0.877279	0.219865	-3.99007	6.60539e-05	0.00139851
Ddx60	ENSMUSG00000037921	protein_coding	234311	183.509	-0.878589	0.193326	-4.5446	5.50403e-06	0.000165276
Thbs2	ENSMUSG00000023885	protein_coding	21826	145.491	-0.879808	0.269447	-3.26523	0.00109374	0.0134444
NA	NA	NA	NA	476.137	-0.904945	0.104742	-8.63972	5.63522e-18	2.23915e-15
Irf7	ENSMUSG00000025498	protein_coding	NA	1206.41	-0.910188	0.104005	-8.75139	2.10743e-18	9.23269e-16
Krt13	ENSMUSG00000044041	protein_coding	NA	184.408	-0.914813	0.176155	-5.19322	2.06693e-07	9.69354e-06
Gm11100	ENSMUSG00000079357	protein_coding	102633458	592.373	-0.921084	0.11141	-8.2675	1.36802e-16	4.67479e-14
Cldn1	ENSMUSG00000022512	protein_coding	12737	33.4327	-0.926211	0.262811	-3.52425	0.000424688	0.00621784
Ccnb1ip1	ENSMUSG00000071470	protein_coding	239083	96.7098	-0.928136	0.339154	-2.73662	0.00620733	0.0497927
NA	NA	NA	NA	87.5216	-0.930001	0.166406	-5.58876	2.28692e-08	1.46896e-06
Gfra1	ENSMUSG00000025089	protein_coding	14585	3614.75	-0.932626	0.119403	-7.81076	5.68457e-15	1.47162e-12
Psmb8	ENSMUSG00000024338	protein_coding	16913	653.314	-0.949958	0.088356	-10.7515	5.8321e-27	7.66518e-24
NA	NA	NA	NA	48.7062	-0.953486	0.343333	-2.77715	0.0054838	0.0455278
Gm20496	ENSMUSG00000092550	antisense	NA	338.412	-0.958084	0.0908857	-10.5416	5.55265e-26	5.92954e-23
Cmpk2	ENSMUSG00000020638	protein_coding	NA	282.122	-0.959303	0.115326	-8.31817	8.93284e-17	3.17972e-14
Spry4	ENSMUSG00000024427	protein_coding	NA	99.3181	-0.966535	0.215052	-4.49442	6.97608e-06	0.000204098
Ido2	ENSMUSG00000031549	protein_coding	209176	245.491	-0.968401	0.143075	-6.76849	1.30135e-11	1.77878e-09
Zbp1	ENSMUSG00000027514	protein_coding	58203	1068.37	-0.9697	0.10826	-8.95714	3.33193e-19	1.49814e-16
NA	NA	NA	NA	158.282	-0.98104	0.209845	-4.67507	2.9385e-06	9.65524e-05
Wnt7b	ENSMUSG00000022382	protein_coding	22422	317.679	-0.988385	0.109334	-9.04002	1.56643e-19	7.2335e-17
Crocc2	ENSMUSG00000084989	protein_coding	NA	38.895	-0.990323	0.338941	-2.92182	0.00347998	0.0324912
Zkscan4	ENSMUSG00000054931	protein_coding	NA	20.0736	-1.00813	0.363238	-2.7754	0.00551338	0.0457068
Gm11613	ENSMUSG00000085586	processed_transcript	NA	186.646	-1.00893	0.156798	-6.43458	1.23814e-10	1.37369e-08
Elavl2	ENSMUSG00000008489	protein_coding	15569	120.153	-1.01986	0.206838	-4.9307	8.19338e-07	3.17661e-05
NA	NA	NA	NA	123.348	-1.04969	0.210718	-4.98152	6.30882e-07	2.54228e-05
Angpt1	ENSMUSG00000022309	protein_coding	11600	59.0172	-1.0523	0.297698	-3.5348	0.000408087	0.00601083
NA	NA	NA	NA	79.0502	-1.06531	0.187874	-5.67032	1.42531e-08	9.78028e-07
Ror1	ENSMUSG00000035305	protein_coding	26563	28.1475	-1.1019	0.324093	-3.39996	0.000673963	0.00908069
Hpse	ENSMUSG00000035273	protein_coding	15442	16.4661	-1.10743	0.369908	-2.99379	0.00275533	0.0273072
NA	NA	NA	NA	123.437	-1.11475	0.198852	-5.60594	2.07132e-08	1.35596e-06
Btc	ENSMUSG00000082361	protein_coding	12223	113.923	-1.11556	0.232907	-4.7897	1.67031e-06	5.97337e-05
NA	NA	NA	NA	968.983	-1.12039	0.246065	-4.55322	5.283e-06	0.000160045
Mx1	ENSMUSG00000000386	polymorphic_pseudogene	NA	149.549	-1.12706	0.136574	-8.25237	1.5528e-16	5.20218e-14
Pi16	ENSMUSG00000024011	protein_coding	74116	43.8582	-1.12885	0.281807	-4.00575	6.1822e-05	0.00131871
NA	NA	NA	NA	163.5	-1.13874	0.185052	-6.15359	7.57495e-10	6.67142e-08
Mc3r	ENSMUSG00000038537	protein_coding	NA	68.2426	-1.15147	0.21469	-5.36342	8.16617e-08	4.51544e-06
Gm48140	ENSMUSG00000114049	antisense	NA	19.2669	-1.15216	0.404388	-2.84915	0.00438361	0.0386473
Trim66	ENSMUSG00000031026	protein_coding	330627	145.967	-1.16713	0.177695	-6.56815	5.0944e-11	6.21735e-09
NA	NA	NA	NA	143.874	-1.17659	0.293004	-4.01563	5.92875e-05	0.00127741
NA	NA	NA	NA	129.389	-1.18274	0.155854	-7.58872	3.2307e-14	6.89997e-12
NA	NA	NA	NA	39.9354	-1.19874	0.405101	-2.9591	0.00308536	0.0297162
Hsd11b1	ENSMUSG00000016194	protein_coding	15483	30.7497	-1.20848	0.310674	-3.88987	0.000100299	0.00193203
NA	NA	NA	NA	173.906	-1.21023	0.230724	-5.24539	1.55954e-07	7.67906e-06
Mmp9	ENSMUSG00000017737	protein_coding	NA	104.76	-1.21992	0.189583	-6.43476	1.2367e-10	1.37369e-08
Rarb	ENSMUSG00000017491	protein_coding	218772	173.742	-1.22685	0.16532	-7.42106	1.16183e-13	2.23044e-11
Ifi44	ENSMUSG00000028037	protein_coding	99899	505.908	-1.235	0.142436	-8.67056	4.30012e-18	1.74933e-15
NA	NA	NA	NA	59.9679	-1.24515	0.301949	-4.1237	3.72831e-05	0.000861551
Ifi208	ENSMUSG00000066677	protein_coding	100033459	28.9411	-1.26143	0.301538	-4.18331	2.87296e-05	0.000692346
Gpr149	ENSMUSG00000043441	protein_coding	229357	1273.89	-1.26176	0.164161	-7.68614	1.51646e-14	3.45469e-12
Gbp9	ENSMUSG00000029298	protein_coding	236573	465.238	-1.26661	0.109853	-11.5301	9.3082e-31	1.988e-27
Padi2	ENSMUSG00000028927	protein_coding	18600	42.2257	-1.26867	0.319784	-3.96726	7.27047e-05	0.00149847
Oas2	ENSMUSG00000032690	protein_coding	246728	2312.98	-1.27573	0.22694	-5.62144	1.89377e-08	1.2493e-06
NA	NA	NA	NA	84.5721	-1.29856	0.291736	-4.45115	8.54121e-06	0.000243225
Ifi27l2a	ENSMUSG00000079017	protein_coding	NA	615.773	-1.31525	0.188415	-6.98064	2.9384e-12	4.52302e-10
Slc9a9	ENSMUSG00000031129	protein_coding	331004	30.5472	-1.3339	0.281566	-4.73743	2.16445e-06	7.456e-05
Rasgef1b	ENSMUSG00000089809	protein_coding	320292	48.9974	-1.3478	0.367675	-3.66574	0.000246627	0.00399798
Pcsk9	ENSMUSG00000044254	protein_coding	100102	35.3215	-1.37811	0.302366	-4.55774	5.17073e-06	0.000157482
NA	NA	NA	NA	117.828	-1.4038	0.196816	-7.13255	9.8523e-13	1.6667e-10
Il13ra2	ENSMUSG00000031289	protein_coding	NA	101.685	-1.41154	0.221018	-6.38653	1.69698e-10	1.78979e-08
Mctp2	ENSMUSG00000032776	protein_coding	244049	92.8023	-1.41378	0.246729	-5.73007	1.00391e-08	7.00113e-07
NA	NA	NA	NA	156.356	-1.42333	0.298645	-4.76596	1.87959e-06	6.64901e-05
Gm37127	ENSMUSG00000104358	TEC	NA	17.5195	-1.44844	0.434326	-3.33492	0.000853233	0.0109114
Plac8	ENSMUSG00000029322	protein_coding	231507	54.3651	-1.45763	0.188427	-7.73576	1.02784e-14	2.47348e-12
NA	NA	NA	NA	16.7066	-1.51515	0.454355	-3.33473	0.000853831	0.0109114
Ppara	ENSMUSG00000022383	protein_coding	19013	60.9486	-1.52844	0.396208	-3.85767	0.000114471	0.00214694
NA	NA	NA	NA	118.119	-1.60431	0.184574	-8.69197	3.56198e-18	1.48439e-15
NA	NA	NA	NA	104.093	-1.64902	0.269381	-6.1215	9.26977e-10	7.95896e-08
Myh14	ENSMUSG00000030739	protein_coding	71960	175.526	-1.65026	0.277704	-5.94251	2.80682e-09	2.23057e-07
Aldh1a1	ENSMUSG00000053279	protein_coding	11668	20.6996	-1.71077	0.420388	-4.06951	4.7112e-05	0.00104676
Abca1	ENSMUSG00000015243	protein_coding	11303	68.2439	-1.75317	0.31323	-5.59706	2.18015e-08	1.40566e-06
Gm37570	ENSMUSG00000102559	TEC	NA	12.8168	-1.89202	0.532645	-3.55212	0.000382148	0.0057225
NA	NA	NA	NA	38.0474	-2.17134	0.574168	-3.78171	0.000155756	0.00272111
Btn1a1	ENSMUSG00000000706	protein_coding	12231	83.1483	-2.36305	0.338902	-6.97268	3.10968e-12	4.74393e-10
NA	NA	NA	NA	58.8717	-2.55501	0.319275	-8.00255	1.21873e-15	3.47055e-13
NA	NA	NA	NA	60.8693	-3.06017	0.3607	-8.48396	2.17648e-17	8.26386e-15

## Sheet: Sup.Table 1 B stress DEgene
mgi_symbol	ensembl_gene_id	gene_biotype	entrezgene_id	baseMean.x	log2FoldChange.x	lfcSE.x	stat.x	pvalue.x	padj.x
Gm6807	ENSMUSG00000057605	processed_pseudogene	NA	106.643	-0.451617	0.179761	-2.51233	0.0119939	0.0315397
mt-Tm	ENSMUSG00000064344	Mt_tRNA	NA	716.666	4.14871	0.176994	23.4398	1.68e-121	1.01e-117
Gm28321	ENSMUSG00000100816	lincRNA	NA	92.551	4.13856	0.295472	14.0066	1.42e-44	5.48e-42
NA	NA	NA	NA	43.7801	3.70467	0.319529	11.5942	4.41e-31	7.7e-29
NA	NA	NA	NA	19.881	3.66596	0.426926	8.58688	8.94e-18	4.2e-16
Ifi209	ENSMUSG00000043263	protein_coding	236312	28.4017	3.595	0.522593	6.87916	6.02e-12	1.27e-10
NA	NA	NA	NA	103.478	3.56019	0.232671	15.3014	7.49e-53	5.03e-50
NA	NA	NA	NA	54.8828	3.544	0.270433	13.1049	3.09e-39	8.75e-37
Gm28187	ENSMUSG00000099375	lincRNA	NA	37.9169	3.54023	0.346348	10.2216	1.59e-24	1.63e-22
2010016I18Rik	ENSMUSG00000091575	processed_transcript	NA	12.9993	3.29186	0.567914	5.7964	6.78e-09	8.44e-08
NA	NA	NA	NA	62.387	3.2203	0.279306	11.5297	9.35e-31	1.6e-28
NA	NA	NA	NA	55.8672	3.0857	0.293525	10.5126	7.56e-26	8.63e-24
Serpinb9f	ENSMUSG00000038327	protein_coding	20709	44.0679	3.08039	0.276059	11.1584	6.51e-29	9.45e-27
NA	NA	NA	NA	31.6653	3.07324	0.305886	10.047	9.47e-24	8.86e-22
Gm22622	ENSMUSG00000094183	snoRNA	NA	11.3678	2.89397	0.608597	4.75515	1.98e-06	1.46e-05
NA	NA	NA	NA	37.8355	2.88586	0.290477	9.93492	2.93e-23	2.58e-21
Asb17os	ENSMUSG00000086438	antisense	NA	24.5936	2.87922	0.472638	6.09182	1.12e-09	1.62e-08
Serpinb9g	ENSMUSG00000057726	protein_coding	93806	61.6709	2.77221	0.225414	12.2983	9.25e-35	2.1e-32
Gm34667	ENSMUSG00000113063	lincRNA	NA	16.6667	2.76953	0.483154	5.7322	9.91e-09	1.2e-07
NA	NA	NA	NA	19.0118	2.72727	0.441003	6.18424	6.24e-10	9.44e-09
NA	NA	NA	NA	69.8355	2.72503	0.203264	13.4063	5.55e-41	1.83e-38
NA	NA	NA	NA	12.6077	2.70166	0.522753	5.16813	2.36e-07	2.13e-06
NA	NA	NA	NA	17.5739	2.68426	0.4575	5.86724	4.43e-09	5.73e-08
NA	NA	NA	NA	16.9715	2.67858	0.396668	6.75271	1.45e-11	2.91e-10
NA	NA	NA	NA	29.7002	2.65825	0.319149	8.32918	8.14e-17	3.41e-15
Smim41	ENSMUSG00000075408	protein_coding	NA	27.4922	2.6534	0.3422	7.75396	8.91e-15	2.81e-13
NA	NA	NA	NA	26.6468	2.65017	0.337677	7.84824	4.22e-15	1.39e-13
NA	NA	NA	NA	63.3386	2.6358	0.233096	11.3078	1.2e-29	1.88e-27
NA	NA	NA	NA	158.311	2.63257	0.218353	12.0565	1.79e-33	3.74e-31
Tmem132b	ENSMUSG00000070498	protein_coding	208151	75.835	2.62414	0.224901	11.668	1.86e-31	3.4e-29
mt-Tf	ENSMUSG00000064336	Mt_tRNA	NA	102.011	2.60066	0.411678	6.31722	2.66e-10	4.23e-09
NA	NA	NA	NA	968.983	2.58645	0.11556	22.3819	5.91e-111	2.68e-107
Krt7	ENSMUSG00000023039	protein_coding	NA	16.3478	2.57877	0.486675	5.29876	1.17e-07	1.13e-06
Gm37607	ENSMUSG00000103839	TEC	NA	190.516	2.56975	0.188703	13.618	3.13e-42	1.07e-39
Gprin3	ENSMUSG00000045441	protein_coding	243385	25.0383	2.53158	0.448231	5.64795	1.62e-08	1.88e-07
NA	NA	NA	NA	85.2198	2.51923	0.188324	13.3771	8.23e-41	2.58e-38
NA	NA	NA	NA	43.9623	2.48698	0.27552	9.02652	1.77e-19	1.04e-17
mt-Tv	ENSMUSG00000064338	Mt_tRNA	NA	135.946	2.47757	0.25007	9.9075	3.86e-23	3.34e-21
NA	NA	NA	NA	186.375	2.46323	0.169996	14.49	1.4e-47	6.87e-45
NA	NA	NA	NA	83.7546	2.44781	0.249711	9.80258	1.1e-22	8.97e-21
NA	NA	NA	NA	45.3939	2.43908	0.266648	9.14718	5.84e-20	3.68e-18
Nfib	ENSMUSG00000008575	protein_coding	18028	45.4928	2.43413	0.272176	8.94321	3.78e-19	2.14e-17
NA	NA	NA	NA	995.599	2.41942	0.115512	20.9452	2.07e-97	6.27e-94
Gm16092	ENSMUSG00000089714	lincRNA	NA	35.8687	2.40326	0.519484	4.62625	3.72e-06	2.58e-05
NA	NA	NA	NA	37.2862	2.39858	0.26827	8.94091	3.86e-19	2.18e-17
Il16	ENSMUSG00000001741	protein_coding	16170	13.2595	2.37051	0.517401	4.58156	4.62e-06	3.13e-05
Tmprss6	ENSMUSG00000016942	protein_coding	71753	26.083	2.30147	0.333003	6.91126	4.8e-12	1.03e-10
Arap3	ENSMUSG00000024451	protein_coding	106952	19.6271	2.29494	0.387657	5.92003	3.22e-09	4.28e-08
Gm15535	ENSMUSG00000085527	sense_intronic	NA	9.96578	2.29419	0.511675	4.48369	7.34e-06	4.72e-05
Clec10a	ENSMUSG00000000318	protein_coding	17312	26.4776	2.29382	0.381178	6.01771	1.77e-09	2.47e-08
Gm40723	ENSMUSG00000112134	lincRNA	NA	27.8182	2.26902	0.362049	6.26715	3.68e-10	5.71e-09
Cdiptos	ENSMUSG00000097075	protein_coding	NA	24.7287	2.26528	0.346923	6.52963	6.59e-11	1.16e-09
Ccdc170	ENSMUSG00000019767	protein_coding	100504234	19.4736	2.25372	0.340904	6.611	3.82e-11	7.14e-10
Txlnb	ENSMUSG00000039891	protein_coding	378431	30.9217	2.22395	0.428716	5.18747	2.13e-07	1.94e-06
NA	NA	NA	NA	234.542	2.19897	0.153602	14.3161	1.74e-46	7.5e-44
Plb1	ENSMUSG00000029134	protein_coding	665270	294.59	2.19184	0.158152	13.859	1.12e-43	4.07e-41
Lrrc55	ENSMUSG00000075224	protein_coding	241528	39.3061	2.16402	0.271115	7.98193	1.44e-15	5.06e-14
Kcnma1	ENSMUSG00000063142	protein_coding	16531	24.7589	2.09638	0.373822	5.60795	2.05e-08	2.32e-07
Gm47078	ENSMUSG00000112275	lincRNA	NA	15.659	2.08268	0.431819	4.82304	1.41e-06	1.07e-05
Serpinb9e	ENSMUSG00000062342	protein_coding	20710	135.156	2.03869	0.15516	13.1393	1.96e-39	5.65e-37
NA	NA	NA	NA	44.8191	2.03513	0.271934	7.48392	7.21e-14	2.03e-12
Cdh26	ENSMUSG00000039155	protein_coding	381409	128.769	2.03381	0.187698	10.8355	2.34e-27	3.14e-25
Gm11991	ENSMUSG00000082095	processed_pseudogene	NA	9.21753	2.01921	0.75182	2.68577	0.00723636	0.0204904
Gm43366	ENSMUSG00000104665	TEC	NA	48.262	1.99595	0.243547	8.19536	2.5e-16	9.75e-15
NA	NA	NA	NA	78.0123	1.98383	0.187808	10.5631	4.42e-26	5.21e-24
Gm47271	ENSMUSG00000111846	antisense	NA	38.9483	1.96555	0.251506	7.81513	5.49e-15	1.78e-13
NA	NA	NA	NA	32.624	1.95333	0.297196	6.57255	4.95e-11	9.05e-10
Gm16638	ENSMUSG00000087088	antisense	NA	72.6733	1.94968	0.239119	8.15358	3.53e-16	1.36e-14
NA	NA	NA	NA	51.8739	1.94762	0.350172	5.5619	2.67e-08	2.96e-07
Hunk	ENSMUSG00000053414	protein_coding	26559	28.2256	1.94625	0.298247	6.52565	6.77e-11	1.19e-09
mt-Tt	ENSMUSG00000064371	Mt_tRNA	NA	1497.67	1.93867	0.132584	14.6223	2.03e-48	1.08e-45
NA	NA	NA	NA	78.7214	1.93376	0.193132	10.0126	1.34e-23	1.22e-21
Usp17la	ENSMUSG00000054568	protein_coding	13531	204.471	1.92521	0.124359	15.4811	4.66e-54	3.52e-51
NA	NA	NA	NA	10.9539	1.92022	0.66044	2.90748	0.00364352	0.0113439
Spag8	ENSMUSG00000066196	protein_coding	NA	25.7183	1.90728	0.348669	5.47018	4.5e-08	4.76e-07
NA	NA	NA	NA	5660.48	1.87711	0.117309	16.0014	1.25e-57	1.19e-54
NA	NA	NA	NA	5664.24	1.87687	0.117285	16.0026	1.22e-57	1.19e-54
NA	NA	NA	NA	112.919	1.87253	0.154284	12.1369	6.73e-34	1.45e-31
Tmc3	ENSMUSG00000038540	protein_coding	233424	58.653	1.86984	0.256193	7.29856	2.91e-13	7.47e-12
NA	NA	NA	NA	47.8523	1.86141	0.260863	7.1356	9.64e-13	2.3e-11
NA	NA	NA	NA	24.9532	1.85412	0.361396	5.13045	2.89e-07	2.56e-06
Wdr66	ENSMUSG00000029442	protein_coding	269701	59.2527	1.83981	0.214648	8.57129	1.02e-17	4.8e-16
NA	NA	NA	NA	133.602	1.83252	0.160612	11.4096	3.75e-30	6.23e-28
C130083M11Rik	ENSMUSG00000106464	lincRNA	NA	163.011	1.82552	0.218579	8.35179	6.72e-17	2.84e-15
4632427E13Rik	ENSMUSG00000074024	bidirectional_promoter_lncRNA	NA	66.1475	1.82373	0.217328	8.39158	4.8e-17	2.07e-15
NA	NA	NA	NA	189.37	1.82124	0.173338	10.5069	8.03e-26	9.11e-24
NA	NA	NA	NA	35.981	1.81945	0.269659	6.74722	1.51e-11	3.01e-10
Vamp5	ENSMUSG00000073002	protein_coding	53620	10.6433	1.81202	0.599056	3.02479	0.00248809	0.00813167
Gm13339	ENSMUSG00000082884	unprocessed_pseudogene	NA	68.5162	1.81107	0.30245	5.988	2.12e-09	2.93e-08
Bach2os	ENSMUSG00000086150	antisense	NA	156.964	1.81096	0.149581	12.1069	9.71e-34	2.07e-31
NA	NA	NA	NA	13.8472	1.80947	0.500946	3.61211	0.00030371	0.00130167
mt-Nd2	ENSMUSG00000064345	protein_coding	NA	92782.2	1.80804	0.0707443	25.5574	4.55e-144	8.25e-140
Slc2a13	ENSMUSG00000036298	protein_coding	239606	11.1063	1.8051	0.558953	3.22943	0.00124038	0.0044622
Btg4	ENSMUSG00000032056	protein_coding	56057	12.504	1.7969	0.441325	4.07161	4.67e-05	0.00024845
Runx2os2	ENSMUSG00000089849	antisense	NA	11.5375	1.79671	0.612546	2.93318	0.00335511	0.0105711
NA	NA	NA	NA	17.8205	1.79526	0.476888	3.76453	0.00016687	0.00076562
NA	NA	NA	NA	12246.2	1.79221	0.120256	14.9033	3.14e-50	1.85e-47
NA	NA	NA	NA	12246.2	1.79214	0.120256	14.9027	3.16e-50	1.85e-47
Gm36569	ENSMUSG00000102191	antisense	NA	121.654	1.7853	0.209829	8.50835	1.76e-17	8.04e-16
NA	NA	NA	NA	85.9823	1.78387	0.234299	7.61364	2.66e-14	7.87e-13
Csta2	ENSMUSG00000095620	protein_coding	76770	22.8975	1.78372	0.399385	4.46617	7.96e-06	5.08e-05
Gm50105	ENSMUSG00000117818	lincRNA	NA	22.5836	1.77928	0.386105	4.60829	4.06e-06	2.79e-05
Tubb2b	ENSMUSG00000045136	protein_coding	NA	11.2948	1.77535	0.599372	2.96201	0.00305639	0.0097633
Syt1	ENSMUSG00000035864	protein_coding	20979	60.5906	1.75576	0.244677	7.17581	7.19e-13	1.75e-11
4930412C18Rik	ENSMUSG00000085558	processed_transcript	NA	43.0736	1.73165	0.325175	5.32527	1.01e-07	9.91e-07
Dok7	ENSMUSG00000044716	protein_coding	231134	13.5297	1.72862	0.488114	3.54143	0.00039796	0.00164498
Cd80	ENSMUSG00000075122	protein_coding	12519	221.63	1.72705	0.181675	9.50627	1.98e-21	1.44e-19
NA	NA	NA	NA	115.372	1.71881	0.13891	12.3736	3.63e-35	8.67e-33
Gm36211	ENSMUSG00000106426	lincRNA	NA	280.214	1.71471	0.110675	15.4932	3.86e-54	3.04e-51
Gm28438	ENSMUSG00000101939	unprocessed_pseudogene	NA	43.7318	1.71417	0.397059	4.31717	1.58e-05	9.42e-05
Gm13421	ENSMUSG00000085929	processed_transcript	NA	106.598	1.70218	0.182956	9.30377	1.36e-20	8.85e-19
Chst3	ENSMUSG00000057337	protein_coding	53374	20.9846	1.69906	0.445518	3.81367	0.00013692	0.00064285
Gramd2	ENSMUSG00000074259	protein_coding	546134	25.4431	1.68807	0.355745	4.74518	2.08e-06	1.53e-05
NA	NA	NA	NA	22.8841	1.68761	0.308388	5.47235	4.44e-08	4.71e-07
NA	NA	NA	NA	74.6512	1.66834	0.278126	5.9985	1.99e-09	2.76e-08
Erfe	ENSMUSG00000047443	protein_coding	NA	28.3427	1.66724	0.314437	5.30232	1.14e-07	1.11e-06
Kctd12b	ENSMUSG00000041633	protein_coding	NA	29.984	1.66491	0.48432	3.43762	0.00058685	0.00231649
Fancd2	ENSMUSG00000034023	protein_coding	211651	157.944	1.65287	0.373802	4.42178	9.79e-06	6.15e-05
NA	NA	NA	NA	16.0714	1.64741	0.377692	4.36177	1.29e-05	7.88e-05
Ssc5d	ENSMUSG00000035279	protein_coding	269855	378.571	1.64705	0.210555	7.8224	5.18e-15	1.69e-13
Apc2	ENSMUSG00000020135	protein_coding	23805	83.5847	1.64078	0.196994	8.32908	8.15e-17	3.41e-15
C130036L24Rik	ENSMUSG00000073627	processed_transcript	NA	38.1512	1.63819	0.30551	5.36214	8.22e-08	8.24e-07
NA	NA	NA	NA	41.5855	1.63089	0.243699	6.69224	2.2e-11	4.27e-10
Unc13d	ENSMUSG00000057948	protein_coding	NA	158.685	1.6294	0.151311	10.7685	4.85e-27	6.19e-25
Gm37145	ENSMUSG00000102278	TEC	NA	88.4539	1.6287	0.20537	7.93058	2.18e-15	7.44e-14
Olfr1392	ENSMUSG00000101750	protein_coding	NA	15.6105	1.62797	0.394922	4.12225	3.75e-05	0.00020459
Shtn1	ENSMUSG00000041362	protein_coding	71653	32.477	1.62773	0.303093	5.3704	7.86e-08	7.92e-07
Gask1b	ENSMUSG00000027955	protein_coding	68659	1322.63	1.62579	0.111835	14.5374	7.02e-48	3.54e-45
Adam33	ENSMUSG00000027318	protein_coding	110751	10.9925	1.61409	0.454841	3.54869	0.00038716	0.00160596
Ly6a	ENSMUSG00000075602	protein_coding	NA	1738.19	1.61385	0.184499	8.74721	2.19e-18	1.11e-16
Pdk4	ENSMUSG00000019577	protein_coding	27273	967.233	1.61062	0.11585	13.9026	6.1e-44	2.26e-41
BC018473	ENSMUSG00000056032	antisense	NA	12.0925	1.61027	0.464244	3.46858	0.00052322	0.00209448
Rho	ENSMUSG00000030324	protein_coding	NA	18.8375	1.60726	0.342891	4.68737	2.77e-06	1.99e-05
NA	NA	NA	NA	174.219	1.60561	0.188411	8.52182	1.57e-17	7.2e-16
A930007I19Rik	ENSMUSG00000097855	antisense	NA	19.7974	1.60243	0.379911	4.21789	2.47e-05	0.0001402
Ptprc	ENSMUSG00000026395	protein_coding	19264	10.4879	1.59776	0.558695	2.85981	0.00423891	0.0128793
Espl1	ENSMUSG00000058290	protein_coding	105988	907.735	1.5918	0.157409	10.1125	4.86e-24	4.72e-22
NA	NA	NA	NA	11.0404	1.58975	0.479837	3.31311	0.00092265	0.00345342
NA	NA	NA	NA	25.2116	1.56259	0.349985	4.46474	8.02e-06	5.11e-05
Gm21123	ENSMUSG00000109700	lincRNA	NA	55.615	1.56156	0.242863	6.42978	1.28e-10	2.14e-09
NA	NA	NA	NA	889.201	1.55641	0.115388	13.4885	1.83e-41	6.14e-39
Afp	ENSMUSG00000054932	protein_coding	NA	116.909	1.5459	0.19622	7.87839	3.32e-15	1.11e-13
Il2rb	ENSMUSG00000068227	protein_coding	16185	40.1856	1.54267	0.252903	6.09987	1.06e-09	1.54e-08
NA	NA	NA	NA	108.992	1.54021	0.171037	9.00516	2.15e-19	1.24e-17
NA	NA	NA	NA	11.4987	1.53958	0.448633	3.43171	0.00059978	0.00236138
Extl1	ENSMUSG00000028838	protein_coding	56219	78.2056	1.53034	0.31005	4.93577	7.98e-07	6.41e-06
Ly6c1	ENSMUSG00000079018	protein_coding	NA	535.785	1.52764	0.320024	4.77351	1.81e-06	1.35e-05
Gm26660	ENSMUSG00000097601	lincRNA	NA	55.0466	1.52165	0.326445	4.66128	3.14e-06	2.22e-05
Hr	ENSMUSG00000022096	protein_coding	NA	44.8549	1.52009	0.331086	4.59122	4.41e-06	3.01e-05
2310069B03Rik	ENSMUSG00000100291	lincRNA	NA	33.9945	1.51657	0.285087	5.31967	1.04e-07	1.02e-06
NA	NA	NA	NA	103.685	1.50724	0.182672	8.25108	1.57e-16	6.31e-15
NA	NA	NA	NA	14.1974	1.50678	0.520904	2.89262	0.00382043	0.0118216
NA	NA	NA	NA	16.9506	1.50489	0.388883	3.86976	0.00010894	0.00052466
NA	NA	NA	NA	1059.41	1.50242	0.207891	7.22698	4.94e-13	1.22e-11
Gm35315	ENSMUSG00000109771	protein_coding	NA	58.5922	1.49902	0.233726	6.41361	1.42e-10	2.34e-09
1700066O22Rik	ENSMUSG00000085800	lincRNA	NA	93.4134	1.49878	0.183402	8.17208	3.03e-16	1.18e-14
NA	NA	NA	NA	9.56485	1.4965	0.558585	2.67909	0.00738224	0.0208319
Vmn1r43	ENSMUSG00000068231	protein_coding	113847	18.5285	1.49622	0.39805	3.75887	0.00017068	0.00078037
NA	NA	NA	NA	72.1155	1.48954	0.262146	5.68212	1.33e-08	1.57e-07
1810062G17Rik	ENSMUSG00000027713	protein_coding	72282	19.9514	1.48268	0.374059	3.96376	7.38e-05	0.00037092
1700029J07Rik	ENSMUSG00000071103	protein_coding	NA	42.7974	1.47657	0.272781	5.41302	6.2e-08	6.38e-07
Kif18b	ENSMUSG00000051378	protein_coding	70218	459.375	1.47366	0.179284	8.21969	2.04e-16	8.06e-15
Lama2	ENSMUSG00000019899	protein_coding	16773	33.1321	1.47129	0.273839	5.37282	7.75e-08	7.83e-07
NA	NA	NA	NA	60.526	1.4691	0.320703	4.58088	4.63e-06	3.14e-05
NA	NA	NA	NA	112.092	1.4648	0.18875	7.76053	8.46e-15	2.68e-13
NA	NA	NA	NA	110.152	1.46343	0.166054	8.81298	1.22e-18	6.43e-17
Polq	ENSMUSG00000034206	protein_coding	77782	96.9575	1.45881	0.398707	3.65884	0.00025336	0.00111212
NA	NA	NA	NA	16.9088	1.45389	0.37605	3.86623	0.00011053	0.00053133
Gm13073	ENSMUSG00000084807	lincRNA	NA	118.135	1.45289	0.151696	9.57764	9.93e-22	7.41e-20
NA	NA	NA	NA	31.6156	1.44948	0.304935	4.75341	2e-06	1.47e-05
Frg2f1	ENSMUSG00000087385	protein_coding	NA	58.1068	1.44892	0.234186	6.18707	6.13e-10	9.29e-09
NA	NA	NA	NA	1585.47	1.4402	0.0566465	25.4244	1.35e-142	1.23e-138
Trem3	ENSMUSG00000041754	protein_coding	58218	28.6431	1.44012	0.342891	4.19992	2.67e-05	0.00015043
Mylk	ENSMUSG00000022836	protein_coding	107589	423.073	1.43598	0.121826	11.7871	4.55e-32	8.69e-30
5430431A17Rik	ENSMUSG00000108322	lincRNA	NA	13.6816	1.43397	0.398182	3.6013	0.00031663	0.00134812
Srpx2	ENSMUSG00000031253	protein_coding	NA	44.6453	1.4301	0.389858	3.66826	0.00024421	0.00107586
NA	NA	NA	NA	51.0554	1.42932	0.235741	6.06308	1.34e-09	1.91e-08
Nppb	ENSMUSG00000029019	protein_coding	NA	43.714	1.42333	0.286801	4.9628	6.95e-07	5.67e-06
NA	NA	NA	NA	130.748	1.42201	0.153741	9.24943	2.26e-20	1.46e-18
Ddx60	ENSMUSG00000037921	protein_coding	234311	183.509	1.42038	0.239138	5.93957	2.86e-09	3.83e-08
Senp8	ENSMUSG00000051705	protein_coding	71599	139.302	1.41785	0.20748	6.8337	8.27e-12	1.72e-10
Gm26797	ENSMUSG00000097572	lincRNA	NA	51.142	1.41373	0.233262	6.06071	1.36e-09	1.93e-08
Dnah7b	ENSMUSG00000041144	protein_coding	227058	42.097	1.4127	0.31979	4.41758	9.98e-06	6.27e-05
Cpne4	ENSMUSG00000032564	protein_coding	74020	33.3643	1.40732	0.302432	4.65334	3.27e-06	2.3e-05
Gm17399	ENSMUSG00000097402	lincRNA	NA	8.91244	1.40117	0.554604	2.52643	0.0115228	0.0304377
NA	NA	NA	NA	280.865	1.39849	0.140836	9.92994	3.08e-23	2.7e-21
Zc4h2	ENSMUSG00000035062	protein_coding	NA	113.321	1.39241	0.200856	6.93235	4.14e-12	8.99e-11
NA	NA	NA	NA	25.0342	1.38471	0.553409	2.50214	0.0123445	0.0323352
Ifi44	ENSMUSG00000028037	protein_coding	99899	505.908	1.38456	0.199995	6.92299	4.42e-12	9.56e-11
6430553K19Rik	ENSMUSG00000116755	lincRNA	NA	99.909	1.38197	0.153461	9.00534	2.15e-19	1.24e-17
NA	NA	NA	NA	41.1199	1.38049	0.229115	6.02532	1.69e-09	2.36e-08
2310030G06Rik	ENSMUSG00000032062	protein_coding	NA	12.2589	1.37484	0.40887	3.36254	0.00077229	0.00295774
mt-Tq	ENSMUSG00000064343	Mt_tRNA	NA	38946.9	1.37124	0.0740523	18.5172	1.5e-76	3.02e-73
Gm19410	ENSMUSG00000109372	protein_coding	100502846	348.782	1.36884	0.22253	6.15127	7.69e-10	1.14e-08
NA	NA	NA	NA	147.535	1.36837	0.126635	10.8056	3.24e-27	4.26e-25
Ap3b2	ENSMUSG00000062444	protein_coding	11775	11.5147	1.36579	0.482223	2.83228	0.00462168	0.013852
NA	NA	NA	NA	44.3786	1.36447	0.265069	5.1476	2.64e-07	2.36e-06
Nkpd1	ENSMUSG00000060621	protein_coding	NA	20.7239	1.36291	0.33995	4.00916	6.09e-05	0.0003129
Clec2f	ENSMUSG00000089728	protein_coding	NA	97.3822	1.36	0.228378	5.95503	2.6e-09	3.52e-08
Gm32282	ENSMUSG00000117648	bidirectional_promoter_lncRNA	NA	25.4799	1.35447	0.338877	3.99695	6.42e-05	0.00032828
Il1a	ENSMUSG00000027399	protein_coding	16175	18.8326	1.35418	0.464702	2.91408	0.00356737	0.0111393
Lyplal1	ENSMUSG00000039246	protein_coding	226791	18.6256	1.35216	0.523672	2.58207	0.00982104	0.0265119
5430425K12Rik	ENSMUSG00000114554	lincRNA	NA	97.0755	1.3496	0.193517	6.97403	3.08e-12	6.8e-11
Cage1	ENSMUSG00000044566	protein_coding	71213	39.1576	1.34483	0.264065	5.09279	3.53e-07	3.05e-06
Tgtp2	ENSMUSG00000078921	protein_coding	NA	198	1.34332	0.195461	6.87258	6.31e-12	1.33e-10
Trp53inp1	ENSMUSG00000028211	protein_coding	60599	5169.92	1.34052	0.132194	10.1405	3.65e-24	3.62e-22
Shcbp1	ENSMUSG00000022322	protein_coding	20419	150.93	1.33825	0.365834	3.65809	0.0002541	0.00111512
Myh10	ENSMUSG00000020900	protein_coding	77579	127.194	1.33649	0.138161	9.67341	3.91e-22	3.07e-20
NA	NA	NA	NA	14.8511	1.33636	0.423097	3.15852	0.00158573	0.00552598
1700007K13Rik	ENSMUSG00000026831	protein_coding	NA	14.5142	1.33519	0.420156	3.17786	0.00148369	0.00521043
Fam120c	ENSMUSG00000025262	protein_coding	NA	428.161	1.33323	0.135546	9.83597	7.88e-23	6.62e-21
P2ry10b	ENSMUSG00000054293	protein_coding	NA	163.284	1.33104	0.223577	5.95338	2.63e-09	3.55e-08
Hic1	ENSMUSG00000043099	protein_coding	NA	16.9073	1.3243	0.411002	3.22212	0.00127246	0.00456045
Septin1	ENSMUSG00000000486	protein_coding	54204	36.3502	1.32429	0.274791	4.81927	1.44e-06	1.09e-05
Gen1	ENSMUSG00000051235	protein_coding	209334	146.726	1.32303	0.268566	4.92628	8.38e-07	6.72e-06
NA	NA	NA	NA	21.3928	1.31921	0.356822	3.69712	0.00021806	0.00097127
Foxred2	ENSMUSG00000016552	protein_coding	239554	214.169	1.31277	0.163955	8.00689	1.18e-15	4.18e-14
Ikzf2	ENSMUSG00000025997	protein_coding	22779	127.412	1.31212	0.191822	6.8403	7.9e-12	1.64e-10
Lyz2	ENSMUSG00000069516	protein_coding	NA	166.502	1.30776	0.149418	8.75237	2.09e-18	1.06e-16
5033406O09Rik	ENSMUSG00000113769	lincRNA	NA	31.9176	1.30611	0.302618	4.31603	1.59e-05	9.46e-05
Tubb3	ENSMUSG00000062380	protein_coding	NA	93.9845	1.30478	0.279351	4.67074	3e-06	2.14e-05
Stambp-ps1	ENSMUSG00000107505	processed_pseudogene	NA	94.505	1.30449	0.153582	8.49372	2e-17	9.05e-16
Arhgef6	ENSMUSG00000031133	protein_coding	NA	224.958	1.30409	0.134282	9.71159	2.69e-22	2.17e-20
Rab25	ENSMUSG00000008601	protein_coding	NA	22.0391	1.30293	0.321974	4.04669	5.19e-05	0.00027308
Efcab8	ENSMUSG00000044083	protein_coding	100504221	43.8332	1.29975	0.257031	5.05677	4.26e-07	3.63e-06
Gm14252	ENSMUSG00000085546	antisense	NA	103.586	1.29843	0.194667	6.67001	2.56e-11	4.92e-10
mt-Tg	ENSMUSG00000064359	Mt_tRNA	NA	162.478	1.29835	0.210838	6.15805	7.36e-10	1.1e-08
Mttp	ENSMUSG00000028158	protein_coding	17777	153.725	1.29441	0.156884	8.25076	1.57e-16	6.32e-15
NA	NA	NA	NA	147.704	1.29435	0.164917	7.84848	4.21e-15	1.39e-13
Akp-ps1	ENSMUSG00000101940	transcribed_unprocessed_pseudogene	NA	27.4968	1.29338	0.264621	4.88766	1.02e-06	8.03e-06
Col7a1	ENSMUSG00000025650	protein_coding	NA	306.315	1.29084	0.110435	11.6887	1.46e-31	2.69e-29
C1ql1	ENSMUSG00000045532	protein_coding	NA	31.5007	1.28387	0.321803	3.98963	6.62e-05	0.00033723
5930409G06Rik	ENSMUSG00000103477	TEC	NA	30.48	1.28259	0.282642	4.53787	5.68e-06	3.76e-05
NA	NA	NA	NA	11047.9	1.28136	0.152031	8.42828	3.51e-17	1.54e-15
NA	NA	NA	NA	11059.2	1.28135	0.152201	8.41875	3.81e-17	1.66e-15
Gbp7	ENSMUSG00000040253	protein_coding	229900	304.897	1.27576	0.202208	6.30914	2.81e-10	4.43e-09
Mki67	ENSMUSG00000031004	protein_coding	17345	1836.86	1.27559	0.244414	5.21897	1.8e-07	1.66e-06
Ccdc65	ENSMUSG00000003354	protein_coding	105833	50.1826	1.27058	0.342656	3.70804	0.00020887	0.00093427
Cercam	ENSMUSG00000039787	protein_coding	NA	45.8066	1.26627	0.290658	4.35655	1.32e-05	8.05e-05
Fbxo47	ENSMUSG00000070336	protein_coding	72973	13.428	1.25934	0.415078	3.03398	0.00241353	0.00792512
Abcg4	ENSMUSG00000032131	protein_coding	NA	97.8703	1.25593	0.237483	5.2885	1.23e-07	1.18e-06
Nefl	ENSMUSG00000022055	protein_coding	NA	40.0417	1.25399	0.315104	3.9796	6.9e-05	0.00034943
NA	NA	NA	NA	12.5105	1.24602	0.437918	2.84533	0.00443653	0.013399
Neu3	ENSMUSG00000035239	protein_coding	50877	115.308	1.24352	0.153535	8.09923	5.53e-16	2.06e-14
Samd10	ENSMUSG00000038605	protein_coding	NA	176.099	1.24175	0.188293	6.59476	4.26e-11	7.91e-10
Amh	ENSMUSG00000035262	protein_coding	NA	13.9147	1.24161	0.426141	2.91361	0.00357274	0.0111522
Spock2	ENSMUSG00000058297	protein_coding	94214	39.1024	1.23945	0.241703	5.12802	2.93e-07	2.58e-06
Ifi206	ENSMUSG00000037849	protein_coding	102639543	121.92	1.22679	0.201045	6.10208	1.05e-09	1.53e-08
NA	NA	NA	NA	46.1061	1.22304	0.227517	5.37559	7.63e-08	7.74e-07
NA	NA	NA	NA	217.559	1.22171	0.117865	10.3654	3.56e-25	3.8e-23
Rundc3b	ENSMUSG00000040570	protein_coding	242819	44.1211	1.2194	0.252566	4.82802	1.38e-06	1.05e-05
NA	NA	NA	NA	74.9203	1.21656	0.182564	6.66374	2.67e-11	5.11e-10
mt-Nd3	ENSMUSG00000064360	protein_coding	NA	258.755	1.21643	0.182636	6.6604	2.73e-11	5.22e-10
Dglucy	ENSMUSG00000021185	protein_coding	217830	666.776	1.21395	0.11569	10.4932	9.29e-26	1.03e-23
mt-Tl1	ENSMUSG00000064340	Mt_tRNA	NA	2834.25	1.21274	0.0881364	13.7599	4.44e-43	1.55e-40
NA	NA	NA	NA	90.6333	1.20678	0.17735	6.80452	1.01e-11	2.07e-10
Calhm5	ENSMUSG00000049872	protein_coding	NA	145.924	1.20585	0.178372	6.76027	1.38e-11	2.77e-10
NA	NA	NA	NA	33.0735	1.2025	0.259048	4.64202	3.45e-06	2.41e-05
NA	NA	NA	NA	19.732	1.20229	0.332422	3.61677	0.0002983	0.00128061
Tex26	ENSMUSG00000029660	protein_coding	75860	19.6766	1.19948	0.453508	2.64489	0.0081718	0.0227154
NA	NA	NA	NA	41.9289	1.19901	0.27753	4.32029	1.56e-05	9.32e-05
Nanos1	ENSMUSG00000072437	protein_coding	NA	223.975	1.19766	0.127909	9.36338	7.72e-21	5.27e-19
Cbr4	ENSMUSG00000031641	protein_coding	234309	145.535	1.19731	0.23535	5.08735	3.63e-07	3.13e-06
Hspb2	ENSMUSG00000038086	protein_coding	NA	16.913	1.19525	0.399604	2.99109	0.00277984	0.00896725
Gm29680	ENSMUSG00000114541	lincRNA	NA	21.6698	1.19501	0.365952	3.26549	0.00109273	0.00399362
Gm48837	ENSMUSG00000114536	antisense	NA	17.9549	1.19083	0.384525	3.09688	0.00195567	0.00661444
Tmem171	ENSMUSG00000052485	protein_coding	NA	86.7098	1.18846	0.227795	5.21721	1.82e-07	1.67e-06
NA	NA	NA	NA	33.3478	1.18753	0.438934	2.70548	0.00682063	0.019459
Axdnd1	ENSMUSG00000026601	protein_coding	77352	57.9247	1.18712	0.207005	5.73474	9.77e-09	1.18e-07
NA	NA	NA	NA	23.0288	1.18281	0.314965	3.75537	0.00017308	0.00079056
Vav1	ENSMUSG00000034116	protein_coding	22324	30.7221	1.17968	0.262401	4.4957	6.93e-06	4.49e-05
Prr11	ENSMUSG00000020493	protein_coding	270906	434.657	1.17517	0.198815	5.91088	3.4e-09	4.5e-08
NA	NA	NA	NA	25.0623	1.16873	0.387683	3.01464	0.0025728	0.00837084
Fggy	ENSMUSG00000028573	protein_coding	75578	230.201	1.1621	0.149844	7.75539	8.81e-15	2.78e-13
Gm46658	ENSMUSG00000117893	antisense	NA	57.2778	1.16089	0.234115	4.95863	7.1e-07	5.78e-06
NA	NA	NA	NA	203.33	1.15727	0.138313	8.36706	5.91e-17	2.53e-15
NA	NA	NA	NA	19.457	1.15459	0.448307	2.57545	0.010011	0.0269465
NA	NA	NA	NA	45.61	1.15341	0.220728	5.22547	1.74e-07	1.61e-06
NA	NA	NA	NA	18.9497	1.15146	0.387317	2.97292	0.00294978	0.0094516
NA	NA	NA	NA	71.7085	1.1512	0.175195	6.57096	5e-11	9.11e-10
Gm49463	ENSMUSG00000116508	antisense	NA	84.9527	1.14388	0.216591	5.28127	1.28e-07	1.23e-06
Tmem25	ENSMUSG00000002032	protein_coding	NA	29.3054	1.1431	0.366956	3.1151	0.00183882	0.00628127
NA	NA	NA	NA	43.1641	1.14229	0.288251	3.96283	7.41e-05	0.00037212
Gm14137	ENSMUSG00000055926	protein_coding	NA	186.29	1.14182	0.201117	5.67741	1.37e-08	1.6e-07
NA	NA	NA	NA	38.8279	1.14016	0.28613	3.98475	6.76e-05	0.00034281
Gm9530	ENSMUSG00000096950	lincRNA	NA	27.1867	1.13885	0.310605	3.66656	0.00024583	0.00108224
mt-Tr	ENSMUSG00000064361	Mt_tRNA	NA	57.2765	1.13778	0.303305	3.75126	0.00017595	0.00080121
NA	NA	NA	NA	46.1125	1.1339	0.396542	2.85947	0.00424353	0.0128847
Lmo7	ENSMUSG00000033060	protein_coding	380928	107.342	1.13261	0.239862	4.72191	2.34e-06	1.7e-05
NA	NA	NA	NA	38.2907	1.13233	0.290918	3.89226	9.93e-05	0.00048331
Etfbkmt	ENSMUSG00000039958	protein_coding	320204	68.8899	1.1304	0.197831	5.71396	1.1e-08	1.32e-07
Gm15489	ENSMUSG00000086942	antisense	NA	15.2769	1.12862	0.407102	2.77233	0.00556562	0.0162884
Zfp93	ENSMUSG00000055305	protein_coding	22755	235.603	1.12845	0.126341	8.93182	4.19e-19	2.35e-17
Gm47827	ENSMUSG00000114438	antisense	NA	33.802	1.12813	0.310848	3.6292	0.0002843	0.00123009
NA	NA	NA	NA	341.486	1.12812	0.120977	9.32506	1.11e-20	7.32e-19
NA	NA	NA	NA	63.1676	1.1227	0.239609	4.68554	2.79e-06	2e-05
Spn	ENSMUSG00000051457	protein_coding	20737	112.031	1.12214	0.173421	6.4706	9.76e-11	1.67e-09
NA	NA	NA	NA	50.9147	1.12126	0.220413	5.08708	3.64e-07	3.13e-06
Gm22285	ENSMUSG00000094890	snoRNA	NA	209.359	1.12042	0.164998	6.7905	1.12e-11	2.28e-10
Mup3	ENSMUSG00000066154	protein_coding	17842	31.6841	1.11613	0.352944	3.16234	0.00156505	0.00546128
H2ac6	ENSMUSG00000069270	protein_coding	NA	58.6119	1.11584	0.284391	3.92363	8.72e-05	0.00043118
Snhg7os	ENSMUSG00000086775	antisense	NA	22.1316	1.11557	0.330373	3.3767	0.00073361	0.00282392
Bglap	ENSMUSG00000074483	protein_coding	NA	14.6807	1.11365	0.415818	2.67822	0.00740154	0.0208832
Gm10222	ENSMUSG00000067736	unprocessed_pseudogene	NA	228.835	1.11196	0.397213	2.79941	0.00511957	0.0151343
Gm13816	ENSMUSG00000085976	lincRNA	NA	16.5041	1.11191	0.419093	2.65312	0.00797505	0.0222761
Gm50321	ENSMUSG00000118383	lincRNA	NA	331.277	1.10954	0.128781	8.61571	6.95e-18	3.31e-16
NA	NA	NA	NA	24.4314	1.10834	0.336215	3.29653	0.00097885	0.00363529
NA	NA	NA	NA	158.909	1.10703	0.149126	7.42349	1.14e-13	3.14e-12
Camk2a	ENSMUSG00000024617	protein_coding	12322	622.502	1.10635	0.112348	9.84751	7.03e-23	5.96e-21
NA	NA	NA	NA	172.115	1.10633	0.176221	6.27811	3.43e-10	5.35e-09
Insig1	ENSMUSG00000045294	protein_coding	NA	4533.02	1.10605	0.102226	10.8196	2.78e-27	3.71e-25
NA	NA	NA	NA	70.4819	1.1044	0.200444	5.50976	3.59e-08	3.88e-07
Spry3	ENSMUSG00000061654	protein_coding	NA	107.165	1.09534	0.181149	6.0466	1.48e-09	2.09e-08
mt-Rnr2	ENSMUSG00000064339	Mt_rRNA	NA	88198.2	1.09506	0.113799	9.62272	6.41e-22	4.89e-20
Ifit1	ENSMUSG00000034459	protein_coding	15957	1200.81	1.09358	0.128851	8.48717	2.12e-17	9.55e-16
Ephx3	ENSMUSG00000037577	protein_coding	NA	58.3398	1.09195	0.212049	5.14953	2.61e-07	2.33e-06
8430429K09Rik	ENSMUSG00000034587	processed_transcript	NA	157.908	1.09145	0.141166	7.73167	1.06e-14	3.31e-13
Gm45833	ENSMUSG00000110673	lincRNA	NA	75.4825	1.08909	0.196471	5.54325	2.97e-08	3.26e-07
Ak5	ENSMUSG00000039058	protein_coding	229949	284.178	1.08882	0.165315	6.58634	4.51e-11	8.29e-10
Tm6sf1	ENSMUSG00000038623	protein_coding	107769	23.4193	1.08614	0.308274	3.52328	0.00042623	0.00174687
NA	NA	NA	NA	133.999	1.08337	0.185758	5.83216	5.47e-09	6.97e-08
BC025920	ENSMUSG00000074862	protein_coding	NA	153.792	1.08233	0.125498	8.62427	6.45e-18	3.08e-16
Smarca2	ENSMUSG00000024921	protein_coding	67155	173.977	1.08025	0.158074	6.83379	8.27e-12	1.72e-10
NA	NA	NA	NA	38.7054	1.07942	0.225346	4.79006	1.67e-06	1.25e-05
Flrt1	ENSMUSG00000047787	protein_coding	NA	32.0159	1.07666	0.265842	4.05	5.12e-05	0.0002698
Trp53cor1	ENSMUSG00000085912	lincRNA	NA	252.095	1.07237	0.130517	8.21634	2.1e-16	8.26e-15
Cavin2	ENSMUSG00000045954	protein_coding	NA	2918.98	1.07001	0.112758	9.48937	2.32e-21	1.69e-19
Tnfaip8l2	ENSMUSG00000013707	protein_coding	NA	13.894	1.06427	0.38131	2.7911	0.00525295	0.0154757
Smpdl3b	ENSMUSG00000028885	protein_coding	100340	121.243	1.06097	0.232584	4.56166	5.08e-06	3.4e-05
Nsun3	ENSMUSG00000050312	protein_coding	106338	244.054	1.06097	0.137244	7.73049	1.07e-14	3.33e-13
NA	NA	NA	NA	58263.4	1.05961	0.137749	7.69231	1.45e-14	4.44e-13
Stmn4	ENSMUSG00000022044	protein_coding	56471	24.6975	1.05944	0.290067	3.65242	0.00025978	0.00113647
Pou2f2	ENSMUSG00000008496	protein_coding	18987	246.267	1.05873	0.119742	8.84177	9.42e-19	5.04e-17
NA	NA	NA	NA	197.687	1.05791	0.444241	2.38138	0.017248	0.0428941
Fbxl12os	ENSMUSG00000062470	antisense	NA	69.8797	1.05546	0.195082	5.41033	6.29e-08	6.47e-07
NA	NA	NA	NA	108.344	1.051	0.155325	6.76644	1.32e-11	2.66e-10
NA	NA	NA	NA	287.942	1.05026	0.146481	7.16996	7.5e-13	1.82e-11
NA	NA	NA	NA	26.5637	1.04574	0.278168	3.75937	0.00017034	0.00077942
Enpp2	ENSMUSG00000022425	protein_coding	18606	1216.39	1.04011	0.121083	8.59013	8.69e-18	4.13e-16
NA	NA	NA	NA	64.3513	1.03714	0.214472	4.83578	1.33e-06	1.02e-05
Gm20324	ENSMUSG00000100199	antisense	NA	28.6748	1.03595	0.316447	3.2737	0.0010615	0.00389911
NA	NA	NA	NA	94.0835	1.03309	0.179332	5.76076	8.37e-09	1.02e-07
NA	NA	NA	NA	19.5866	1.03302	0.339488	3.04289	0.00234318	0.00773331
Cyp2b13	ENSMUSG00000040583	protein_coding	13089	19.9909	1.0319	0.394769	2.61394	0.00895036	0.024532
NA	NA	NA	NA	337.924	1.03172	0.111726	9.23438	2.6e-20	1.68e-18
Nrn1	ENSMUSG00000039114	protein_coding	NA	653.809	1.03074	0.199533	5.16575	2.39e-07	2.16e-06
NA	NA	NA	NA	19.0708	1.02885	0.3882	2.65031	0.00804177	0.022421
NA	NA	NA	NA	264.604	1.0279	0.146937	6.99547	2.64e-12	5.9e-11
Kcnk4	ENSMUSG00000024957	protein_coding	NA	58.3534	1.0266	0.202696	5.06475	4.09e-07	3.49e-06
Scara5	ENSMUSG00000022032	protein_coding	71145	229.502	1.02608	0.227363	4.51295	6.39e-06	4.19e-05
NA	NA	NA	NA	56.6147	1.02502	0.201216	5.09414	3.5e-07	3.04e-06
Gm4813	ENSMUSG00000114822	processed_pseudogene	NA	1015.65	1.01961	0.126405	8.06625	7.25e-16	2.66e-14
Hecw2	ENSMUSG00000042807	protein_coding	329152	27.8786	1.01853	0.301219	3.38138	0.00072124	0.0027822
NA	NA	NA	NA	248.412	1.01841	0.140328	7.2574	3.95e-13	9.91e-12
Ccl5	ENSMUSG00000035042	protein_coding	NA	233.807	1.01804	0.257891	3.94756	7.9e-05	0.00039383
A630072M18Rik	ENSMUSG00000101013	antisense	NA	96.103	1.01717	0.18347	5.54407	2.96e-08	3.25e-07
Scd4	ENSMUSG00000050195	protein_coding	NA	42.2698	1.01548	0.293941	3.45472	0.00055086	0.00218679
4732440D04Rik	ENSMUSG00000090031	antisense	NA	57.4143	1.01542	0.25194	4.03039	5.57e-05	0.00029019
8430423G03Rik	ENSMUSG00000079069	lincRNA	NA	71.1879	1.01379	0.218614	4.63737	3.53e-06	2.46e-05
Gm38124	ENSMUSG00000103082	TEC	NA	205.385	1.01195	0.112159	9.02248	1.84e-19	1.07e-17
NA	NA	NA	NA	166.685	1.00903	0.280352	3.59914	0.00031927	0.00135778
NA	NA	NA	NA	58.2983	1.0042	0.261661	3.8378	0.00012414	0.00058896
NA	NA	NA	NA	57.7423	1.00229	0.246521	4.06573	4.79e-05	0.00025415
NA	NA	NA	NA	87.1848	0.994676	0.250573	3.9696	7.2e-05	0.00036261
7530414M10Rik	ENSMUSG00000116338	lincRNA	NA	60.1878	0.99383	0.254995	3.89745	9.72e-05	0.00047447
Gbp3	ENSMUSG00000028268	protein_coding	55932	622.496	0.990193	0.150299	6.58817	4.45e-11	8.21e-10
Ggn	ENSMUSG00000031493	protein_coding	NA	83.3059	0.988797	0.202802	4.87567	1.08e-06	8.49e-06
Hsd17b14	ENSMUSG00000030825	protein_coding	66065	55.6095	0.98591	0.203931	4.83454	1.33e-06	1.02e-05
2610316D01Rik	ENSMUSG00000097040	processed_transcript	NA	668.577	0.980488	0.117364	8.35423	6.59e-17	2.79e-15
Gm43012	ENSMUSG00000105802	TEC	NA	32.1572	0.976728	0.311154	3.13905	0.00169496	0.00584488
NA	NA	NA	NA	49.7682	0.972151	0.236519	4.11025	3.95e-05	0.0002141
Vwce	ENSMUSG00000043789	protein_coding	71768	78.4341	0.969354	0.192561	5.034	4.8e-07	4.04e-06
Gm47547	ENSMUSG00000114196	antisense	NA	22.0741	0.967296	0.336774	2.87224	0.00407575	0.0124734
Myo15b	ENSMUSG00000034427	protein_coding	NA	15.3409	0.966592	0.398148	2.42772	0.0151941	0.0384988
Gm2115	ENSMUSG00000097789	protein_coding	NA	1603.89	0.965681	0.152438	6.3349	2.37e-10	3.78e-09
2410012E07Rik	ENSMUSG00000099528	lincRNA	NA	25.6053	0.964288	0.357351	2.69843	0.00696671	0.0198104
Trpc1	ENSMUSG00000032839	protein_coding	22063	62.0582	0.963853	0.28873	3.33825	0.00084308	0.00318516
Rfesd	ENSMUSG00000043190	protein_coding	218341	288.296	0.960604	0.118347	8.11683	4.79e-16	1.8e-14
Sec16b	ENSMUSG00000026589	protein_coding	89867	184.837	0.960505	0.17256	5.56619	2.6e-08	2.89e-07
Sh2d6	ENSMUSG00000052631	protein_coding	71130	79.2415	0.958524	0.262489	3.65168	0.00026053	0.00113949
Mettl27	ENSMUSG00000040557	protein_coding	NA	382.905	0.95571	0.111673	8.55808	1.15e-17	5.34e-16
Ccng1	ENSMUSG00000020326	protein_coding	12450	6766.41	0.955101	0.0789704	12.0944	1.13e-33	2.38e-31
NA	NA	NA	NA	44.4975	0.954631	0.282092	3.38411	0.00071409	0.00276109
Ankrd55	ENSMUSG00000049985	protein_coding	77318	66.5185	0.953953	0.211586	4.50859	6.53e-06	4.27e-05
Pappa	ENSMUSG00000028370	protein_coding	18491	176.488	0.949093	0.181751	5.22195	1.77e-07	1.64e-06
Gm13056	ENSMUSG00000085395	lincRNA	NA	192.132	0.947769	0.201608	4.70105	2.59e-06	1.87e-05
NA	NA	NA	NA	53.9953	0.947635	0.221689	4.27462	1.91e-05	0.00011216
NA	NA	NA	NA	114.178	0.945951	0.169607	5.57729	2.44e-08	2.74e-07
Cux2	ENSMUSG00000042589	protein_coding	13048	34.6622	0.945669	0.265967	3.55559	0.00037713	0.00157085
NA	NA	NA	NA	38.2633	0.945323	0.274159	3.44808	0.00056459	0.00223493
NA	NA	NA	NA	94.158	0.944986	0.193751	4.87733	1.08e-06	8.43e-06
D3Ertd751e	ENSMUSG00000025766	protein_coding	73852	72.413	0.941735	0.266706	3.53099	0.00041401	0.00170198
Neurl3	ENSMUSG00000047180	protein_coding	214854	214.559	0.940587	0.16665	5.64407	1.66e-08	1.92e-07
NA	NA	NA	NA	48.8354	0.939848	0.270138	3.47914	0.00050303	0.00202351
B930059L03Rik	ENSMUSG00000113361	lincRNA	NA	21.1365	0.938827	0.347111	2.70469	0.00683688	0.0194931
Arsj	ENSMUSG00000046561	protein_coding	271970	113.73	0.938045	0.258723	3.62567	0.00028821	0.00124435
NA	NA	NA	NA	39.2787	0.936753	0.263394	3.55648	0.00037586	0.00156684
Troap	ENSMUSG00000032783	protein_coding	78733	460.679	0.936489	0.259925	3.60292	0.00031466	0.00134162
Prkag2os2	ENSMUSG00000087314	antisense	NA	49.8373	0.935248	0.230212	4.06255	4.85e-05	0.00025696
NA	NA	NA	NA	68.9158	0.931243	0.220514	4.22307	2.41e-05	0.00013745
Slc14a2	ENSMUSG00000024552	protein_coding	27411	35.6853	0.929614	0.259556	3.58156	0.00034155	0.00144037
Zc3h6	ENSMUSG00000042851	protein_coding	78751	158.321	0.929509	0.161753	5.74647	9.11e-09	1.11e-07
Ccl4	ENSMUSG00000018930	protein_coding	NA	18.4833	0.92681	0.354716	2.61282	0.00897975	0.024594
Rpgrip1l	ENSMUSG00000033282	protein_coding	244585	356.754	0.925681	0.164017	5.64383	1.66e-08	1.92e-07
B930036N10Rik	ENSMUSG00000091993	antisense	NA	47.8413	0.925395	0.262533	3.52487	0.00042368	0.00173862
Klhl30	ENSMUSG00000026308	protein_coding	NA	355.351	0.924273	0.185305	4.98785	6.11e-07	5.02e-06
NA	NA	NA	NA	359.616	0.923408	0.163817	5.63682	1.73e-08	1.99e-07
Gm36033	ENSMUSG00000111058	lincRNA	NA	895.774	0.923363	0.0947641	9.74381	1.96e-22	1.6e-20
NA	NA	NA	NA	27.9128	0.923046	0.297252	3.10526	0.0019011	0.00645755
Exoc3l	ENSMUSG00000043251	protein_coding	NA	93.947	0.92183	0.208487	4.42153	9.8e-06	6.16e-05
4933421O10Rik	ENSMUSG00000085037	processed_transcript	NA	170.102	0.920995	0.120283	7.65691	1.9e-14	5.73e-13
Ifi203-ps	ENSMUSG00000090222	unprocessed_pseudogene	NA	153.76	0.920526	0.225199	4.08762	4.36e-05	0.000234
Olfr1372-ps1	ENSMUSG00000108218	transcribed_unprocessed_pseudogene	NA	78.9053	0.92009	0.205439	4.47866	7.51e-06	4.82e-05
NA	NA	NA	NA	727.719	0.91987	0.142622	6.44969	1.12e-10	1.9e-09
NA	NA	NA	NA	727.719	0.91987	0.142622	6.44969	1.12e-10	1.9e-09
NA	NA	NA	NA	158.792	0.916781	0.231293	3.96373	7.38e-05	0.00037092
Klf8	ENSMUSG00000041649	protein_coding	NA	237.881	0.916746	0.14332	6.39649	1.59e-10	2.6e-09
Psrc1	ENSMUSG00000068744	protein_coding	56742	741.975	0.913986	0.0960141	9.51929	1.74e-21	1.28e-19
Birc5	ENSMUSG00000017716	protein_coding	11799	789.214	0.912578	0.177014	5.1554	2.53e-07	2.27e-06
Col1a2	ENSMUSG00000029661	protein_coding	12843	15211.3	0.910311	0.139238	6.53779	6.24e-11	1.11e-09
NA	NA	NA	NA	93.4893	0.90987	0.193615	4.69939	2.61e-06	1.88e-05
NA	NA	NA	NA	110.108	0.90763	0.270591	3.35425	0.00079579	0.00303495
NA	NA	NA	NA	95.5982	0.907467	0.19403	4.67695	2.91e-06	2.08e-05
Znrd1as	ENSMUSG00000036214	protein_coding	76416	91.3951	0.906969	0.193768	4.68069	2.86e-06	2.04e-05
Sapcd2	ENSMUSG00000026955	protein_coding	NA	133.022	0.906502	0.194921	4.65061	3.31e-06	2.33e-05
H2bc8	ENSMUSG00000058385	protein_coding	NA	947.889	0.906259	0.119187	7.60368	2.88e-14	8.46e-13
Brca1	ENSMUSG00000017146	protein_coding	12189	567.349	0.905117	0.158998	5.69263	1.25e-08	1.48e-07
Bicd1	ENSMUSG00000003452	protein_coding	12121	151.424	0.904775	0.140917	6.42065	1.36e-10	2.25e-09
NA	NA	NA	NA	29.4719	0.904082	0.298039	3.03344	0.00241786	0.00793791
NA	NA	NA	NA	67.7761	0.903347	0.211685	4.26741	1.98e-05	0.00011525
NA	NA	NA	NA	47.7199	0.902126	0.263225	3.4272	0.00060984	0.00239579
Dcst1	ENSMUSG00000042672	protein_coding	NA	65.422	0.901677	0.223164	4.04042	5.34e-05	0.00027935
1700018M17Rik	ENSMUSG00000046145	pseudogene	NA	59.7615	0.899705	0.279447	3.21958	0.00128377	0.0045919
9030407P20Rik	ENSMUSG00000097343	processed_transcript	NA	74.3338	0.898375	0.244783	3.67008	0.00024247	0.00106874
Shank1	ENSMUSG00000038738	protein_coding	243961	116.701	0.896479	0.237453	3.77539	0.00015976	0.00073673
Bc1	ENSMUSG00000115783	lincRNA	NA	33.7999	0.896332	0.324562	2.76167	0.00575064	0.0167656
Setd7	ENSMUSG00000037111	protein_coding	73251	2675.32	0.894203	0.109492	8.16687	3.16e-16	1.22e-14
Gm49410	ENSMUSG00000115979	TEC	NA	29.8996	0.892132	0.310689	2.87146	0.00408575	0.0124977
NA	NA	NA	NA	328.802	0.890022	0.136937	6.49951	8.06e-11	1.4e-09
NA	NA	NA	NA	266.423	0.882418	0.154603	5.70764	1.15e-08	1.36e-07
Ccdc8	ENSMUSG00000041117	protein_coding	434130	38.7414	0.881547	0.301688	2.92204	0.00347743	0.0108967
Trim54	ENSMUSG00000062077	protein_coding	58522	417.431	0.880951	0.126232	6.97883	2.98e-12	6.58e-11
Nabp1	ENSMUSG00000026107	protein_coding	109019	1349.23	0.880481	0.104081	8.45957	2.68e-17	1.21e-15
Wdr78	ENSMUSG00000035126	protein_coding	242584	66.1649	0.875872	0.205026	4.272	1.94e-05	0.00011323
NA	NA	NA	NA	121.93	0.875475	0.153348	5.70909	1.14e-08	1.35e-07
Ephx1	ENSMUSG00000038776	protein_coding	13849	5804.22	0.875415	0.122156	7.16635	7.7e-13	1.87e-11
NA	NA	NA	NA	147.032	0.871993	0.20664	4.21986	2.44e-05	0.0001392
Pqlc3	ENSMUSG00000045679	protein_coding	217430	823.064	0.869683	0.0944163	9.21115	3.23e-20	2.06e-18
Smad9	ENSMUSG00000027796	protein_coding	55994	165.166	0.865684	0.204857	4.22579	2.38e-05	0.00013601
Gm16170	ENSMUSG00000086245	antisense	NA	112.145	0.864754	0.18494	4.67587	2.93e-06	2.09e-05
NA	NA	NA	NA	97.9972	0.863621	0.177277	4.8716	1.11e-06	8.64e-06
Slc16a8	ENSMUSG00000032988	protein_coding	NA	107.138	0.863384	0.164193	5.25837	1.45e-07	1.37e-06
Krt20	ENSMUSG00000035775	protein_coding	NA	15.9924	0.86271	0.372715	2.31466	0.0206314	0.0497931
NA	NA	NA	NA	52.4632	0.862708	0.196	4.40157	1.07e-05	6.69e-05
Gm37855	ENSMUSG00000102893	lincRNA	NA	66.6012	0.858861	0.207069	4.14771	3.36e-05	0.00018501
Gm37691	ENSMUSG00000104348	TEC	NA	81.623	0.858303	0.190159	4.51359	6.37e-06	4.18e-05
NA	NA	NA	NA	159.307	0.858237	0.13557	6.3306	2.44e-10	3.88e-09
Dnaic2	ENSMUSG00000034706	protein_coding	432611	107.106	0.857309	0.188141	4.55674	5.2e-06	3.47e-05
Stil	ENSMUSG00000028718	protein_coding	20460	252.706	0.856929	0.16981	5.04641	4.5e-07	3.81e-06
Abat	ENSMUSG00000057880	protein_coding	268860	26.4485	0.854818	0.290642	2.94113	0.00327013	0.0103465
NA	NA	NA	NA	125.406	0.854653	0.132591	6.44578	1.15e-10	1.94e-09
Hscb	ENSMUSG00000043510	protein_coding	100900	607.081	0.854472	0.104943	8.14226	3.88e-16	1.48e-14
Dtd2	ENSMUSG00000020956	protein_coding	328092	358.991	0.851256	0.122394	6.95504	3.52e-12	7.75e-11
Atp2a1	ENSMUSG00000030730	protein_coding	NA	56.2175	0.850428	0.204173	4.16523	3.11e-05	0.00017283
Cyp2j6	ENSMUSG00000052914	protein_coding	13110	283.876	0.849152	0.142978	5.93903	2.87e-09	3.84e-08
Samd9l	ENSMUSG00000047735	protein_coding	209086	1331.64	0.848606	0.110399	7.68675	1.51e-14	4.61e-13
Abca8a	ENSMUSG00000041828	protein_coding	217258	126.756	0.848322	0.14471	5.86223	4.57e-09	5.89e-08
Gm14221	ENSMUSG00000078956	lincRNA	NA	148.744	0.847901	0.140504	6.03473	1.59e-09	2.24e-08
NA	NA	NA	NA	50.2008	0.845153	0.199731	4.23146	2.32e-05	0.00013288
C1s1	ENSMUSG00000038521	protein_coding	50908	3594.61	0.84462	0.156394	5.40059	6.64e-08	6.81e-07
1700086O06Rik	ENSMUSG00000097080	lincRNA	NA	265.887	0.843882	0.104114	8.1054	5.26e-16	1.97e-14
Serpinf2	ENSMUSG00000038224	protein_coding	NA	67.226	0.839781	0.204558	4.10535	4.04e-05	0.0002183
Rrm2b	ENSMUSG00000022292	protein_coding	382985	660.851	0.839421	0.152768	5.49473	3.91e-08	4.19e-07
Aox1	ENSMUSG00000063558	protein_coding	11761	2367.88	0.837284	0.103257	8.10871	5.12e-16	1.92e-14
4930471E19Rik	ENSMUSG00000112716	lincRNA	NA	531.587	0.831563	0.116292	7.15061	8.64e-13	2.08e-11
NA	NA	NA	NA	63.766	0.825592	0.223664	3.69121	0.00022319	0.00099217
Anxa9	ENSMUSG00000015702	protein_coding	71790	353.85	0.823952	0.132487	6.21911	5e-10	7.63e-09
AU041133	ENSMUSG00000078435	protein_coding	216177	117.337	0.823082	0.170769	4.81986	1.44e-06	1.09e-05
Cdkl3	ENSMUSG00000020389	protein_coding	213084	169.628	0.818817	0.165672	4.94238	7.72e-07	6.21e-06
Hspa2	ENSMUSG00000059970	protein_coding	15512	185.831	0.81876	0.136887	5.98126	2.21e-09	3.03e-08
Hfe	ENSMUSG00000006611	protein_coding	NA	513.68	0.817249	0.113757	7.18419	6.76e-13	1.66e-11
Dpysl2	ENSMUSG00000022048	protein_coding	12934	446.938	0.816205	0.172365	4.73533	2.19e-06	1.6e-05
Igfals	ENSMUSG00000046070	protein_coding	16005	33.1406	0.813033	0.264067	3.07889	0.00207771	0.0069713
Abhd15	ENSMUSG00000000686	protein_coding	67477	55.8836	0.810725	0.232168	3.49197	0.00047948	0.00193778
mt-Nd1	ENSMUSG00000064341	protein_coding	NA	77217	0.806902	0.0712544	11.3242	9.95e-30	1.6e-27
Card14	ENSMUSG00000013483	protein_coding	170720	240.783	0.805973	0.141192	5.70834	1.14e-08	1.36e-07
Fendrr	ENSMUSG00000097336	processed_transcript	NA	1010.35	0.804866	0.0969143	8.30492	9.99e-17	4.09e-15
Tmem140	ENSMUSG00000057137	protein_coding	68487	737.11	0.804053	0.0949994	8.46377	2.59e-17	1.17e-15
Oxld1	ENSMUSG00000039670	protein_coding	NA	150.222	0.801463	0.160726	4.98652	6.15e-07	5.05e-06
Zfp820	ENSMUSG00000069743	protein_coding	75424	336.277	0.8011	0.108429	7.38823	1.49e-13	4.04e-12
NA	NA	NA	NA	29.5754	0.799175	0.263771	3.0298	0.00244715	0.00801519
A930005H10Rik	ENSMUSG00000054426	processed_transcript	NA	48.3888	0.795347	0.307294	2.58823	0.00964706	0.0261375
Gm8127	ENSMUSG00000090713	protein_coding	NA	111.833	0.794689	0.159974	4.96761	6.78e-07	5.55e-06
NA	NA	NA	NA	223.852	0.794443	0.121148	6.5576	5.47e-11	9.88e-10
Trim30d	ENSMUSG00000057596	protein_coding	209387	370.485	0.793753	0.129994	6.10607	1.02e-09	1.49e-08
NA	NA	NA	NA	59.8454	0.791522	0.226546	3.49388	0.00047606	0.00192482
Nrp1	ENSMUSG00000025810	protein_coding	18186	555.332	0.788629	0.134551	5.8612	4.6e-09	5.92e-08
Snord50b	ENSMUSG00000094179	snoRNA	NA	3083.98	0.787757	0.108329	7.27186	3.55e-13	9e-12
Slx4ip	ENSMUSG00000027281	protein_coding	74243	172.596	0.784358	0.144423	5.43099	5.6e-08	5.81e-07
Pon3	ENSMUSG00000029759	protein_coding	269823	798.001	0.779987	0.119755	6.51318	7.36e-11	1.29e-09
Esam	ENSMUSG00000001946	protein_coding	69524	42.5304	0.779226	0.255572	3.04895	0.00229641	0.0075969
C130046K22Rik	ENSMUSG00000085154	processed_transcript	NA	34.2853	0.776113	0.251423	3.08688	0.0020227	0.00680685
Sgsh	ENSMUSG00000005043	protein_coding	NA	731.433	0.776002	0.0996959	7.78369	7.04e-15	2.25e-13
Arhgdib	ENSMUSG00000030220	protein_coding	11857	484.289	0.772265	0.130712	5.90815	3.46e-09	4.56e-08
Acss2os	ENSMUSG00000086529	antisense	NA	22.9276	0.772082	0.320752	2.4071	0.0160796	0.0404263
Gng11	ENSMUSG00000032766	protein_coding	66066	403.629	0.769303	0.121474	6.33308	2.4e-10	3.82e-09
Dars2	ENSMUSG00000026709	protein_coding	226539	314.329	0.768653	0.133277	5.76731	8.05e-09	9.9e-08
Napepld	ENSMUSG00000044968	protein_coding	242864	128.532	0.768405	0.168677	4.55547	5.23e-06	3.49e-05
Prickle2	ENSMUSG00000030020	protein_coding	243548	307.351	0.765313	0.116077	6.59317	4.31e-11	7.98e-10
4930432K21Rik	ENSMUSG00000008129	protein_coding	74666	38.3143	0.764429	0.285115	2.68113	0.00733747	0.0207304
Tmem198	ENSMUSG00000051703	protein_coding	NA	50.2146	0.763652	0.270605	2.82202	0.00477227	0.0142376
mt-Atp8	ENSMUSG00000064356	protein_coding	NA	37545.6	0.759527	0.0990085	7.67133	1.7e-14	5.18e-13
Fads2	ENSMUSG00000024665	protein_coding	56473	486.42	0.757719	0.146348	5.17751	2.25e-07	2.03e-06
Nlrc3	ENSMUSG00000049871	protein_coding	268857	232.915	0.757585	0.136255	5.56004	2.7e-08	2.99e-07
Gm29054	ENSMUSG00000101144	processed_transcript	NA	94.8366	0.75736	0.23013	3.29101	0.0009983	0.00369766
Herpud1	ENSMUSG00000031770	protein_coding	64209	5373.1	0.755433	0.138861	5.44021	5.32e-08	5.54e-07
Mmp9	ENSMUSG00000017737	protein_coding	NA	104.76	0.752892	0.290952	2.58768	0.00966234	0.026175
Rnf113a2	ENSMUSG00000098134	protein_coding	NA	81.294	0.752116	0.200911	3.74352	0.00018146	0.00082417
Triqk	ENSMUSG00000055963	protein_coding	208820	203.277	0.749124	0.147485	5.07931	3.79e-07	3.26e-06
Ikbke	ENSMUSG00000042349	protein_coding	56489	1057.47	0.74909	0.108284	6.91785	4.59e-12	9.9e-11
Gtse1	ENSMUSG00000022385	protein_coding	NA	684.435	0.746162	0.121536	6.13941	8.28e-10	1.23e-08
NA	NA	NA	NA	79.5734	0.745326	0.163738	4.55195	5.32e-06	3.54e-05
Nxpe4	ENSMUSG00000044229	protein_coding	244853	62.86	0.743734	0.197149	3.77244	0.00016166	0.00074456
Gm8032	ENSMUSG00000091788	unprocessed_pseudogene	NA	21.7392	0.742781	0.319372	2.32575	0.0200317	0.0485849
9130208D14Rik	ENSMUSG00000086513	unprocessed_pseudogene	NA	52.5306	0.74155	0.24718	3.00004	0.00269942	0.00873737
Epb41l4a	ENSMUSG00000024376	protein_coding	13824	1330.53	0.741268	0.0787777	9.40962	4.98e-21	3.5e-19
Lsp1	ENSMUSG00000018819	protein_coding	16985	320.23	0.741024	0.166421	4.45269	8.48e-06	5.39e-05
Gm7162	ENSMUSG00000089817	processed_pseudogene	NA	54.5948	0.740171	0.27879	2.65494	0.00793218	0.0221734
C430049B03Rik	ENSMUSG00000087365	processed_transcript	NA	120.634	0.739551	0.199246	3.71174	0.00020584	0.00092332
NA	NA	NA	NA	87.9851	0.737386	0.190591	3.86894	0.00010931	0.00052631
Pde6h	ENSMUSG00000064330	protein_coding	78600	210.066	0.736329	0.181126	4.06529	4.8e-05	0.00025455
Trim30a	ENSMUSG00000030921	protein_coding	20128	683.06	0.735718	0.104926	7.01179	2.35e-12	5.31e-11
NA	NA	NA	NA	33.5016	0.728706	0.248666	2.93047	0.00338453	0.0106472
Btg2	ENSMUSG00000020423	protein_coding	12227	799.227	0.726427	0.111368	6.52279	6.9e-11	1.21e-09
4921536K21Rik	ENSMUSG00000020434	protein_coding	NA	101.75	0.72625	0.152424	4.76467	1.89e-06	1.4e-05
Trmt12	ENSMUSG00000037085	protein_coding	NA	329.298	0.725418	0.116265	6.23937	4.39e-10	6.78e-09
B230354K17Rik	ENSMUSG00000097119	bidirectional_promoter_lncRNA	NA	862.058	0.723691	0.102263	7.07672	1.48e-12	3.45e-11
Zfp78	ENSMUSG00000055150	protein_coding	330463	46.4511	0.721731	0.25748	2.80305	0.00506214	0.0149868
Ttc9c	ENSMUSG00000071660	protein_coding	70387	2659.6	0.721477	0.0812216	8.88283	6.52e-19	3.57e-17
2310068J16Rik	ENSMUSG00000100084	antisense	NA	160.867	0.720712	0.214933	3.35319	0.00079886	0.00304601
0610009B22Rik	ENSMUSG00000007777	protein_coding	NA	336.556	0.717736	0.111464	6.43917	1.2e-10	2.02e-09
Alyref2	ENSMUSG00000060244	protein_coding	NA	71.2324	0.717235	0.210291	3.41067	0.00064803	0.00252665
Adrb2	ENSMUSG00000045730	protein_coding	11555	62.9775	0.717019	0.195797	3.66206	0.0002502	0.00109932
Trp53inp2	ENSMUSG00000038375	protein_coding	68728	1652.61	0.715182	0.112706	6.34555	2.22e-10	3.54e-09
Per2	ENSMUSG00000055866	protein_coding	18627	355.393	0.713049	0.126163	5.65179	1.59e-08	1.84e-07
Glt8d2	ENSMUSG00000020251	protein_coding	74782	87.7537	0.712919	0.254511	2.80113	0.00509239	0.0150609
Gm6493	ENSMUSG00000090021	processed_pseudogene	NA	139.567	0.712481	0.173016	4.11802	3.82e-05	0.00020795
Gm10033	ENSMUSG00000110444	protein_coding	378466	252.636	0.712382	0.128815	5.53028	3.2e-08	3.48e-07
A3galt2	ENSMUSG00000028794	protein_coding	215493	37.0509	0.711119	0.262026	2.71392	0.0066492	0.0190328
Tatdn3	ENSMUSG00000026632	protein_coding	68972	595.254	0.711071	0.0898133	7.91721	2.43e-15	8.24e-14
Gm20005	ENSMUSG00000106674	lincRNA	NA	1656.68	0.70917	0.169009	4.19605	2.72e-05	0.00015289
Sgk3	ENSMUSG00000025915	protein_coding	170755	156.101	0.708276	0.141114	5.01919	5.19e-07	4.34e-06
Ccn4	ENSMUSG00000005124	protein_coding	22402	1531.43	0.707975	0.0840563	8.42262	3.68e-17	1.61e-15
NA	NA	NA	NA	137.34	0.706063	0.180895	3.90316	9.49e-05	0.0004649
Pcdh10	ENSMUSG00000049100	protein_coding	18526	950.341	0.703295	0.0770521	9.12751	7.01e-20	4.35e-18
Tigd5	ENSMUSG00000103906	protein_coding	NA	163.323	0.703108	0.141595	4.96561	6.85e-07	5.6e-06
Lrif1	ENSMUSG00000056260	protein_coding	321000	820.879	0.700863	0.0922512	7.59733	3.02e-14	8.86e-13
NA	NA	NA	NA	127.593	0.698684	0.180527	3.87025	0.00010873	0.00052376
Obscn	ENSMUSG00000061462	protein_coding	380698	89.7745	0.698672	0.148518	4.7043	2.55e-06	1.84e-05
Herc6	ENSMUSG00000029798	protein_coding	67138	594.307	0.698342	0.11829	5.90364	3.56e-09	4.67e-08
Sp140	ENSMUSG00000070031	protein_coding	434484	1416.27	0.696955	0.0897588	7.76475	8.18e-15	2.59e-13
Pilra	ENSMUSG00000046245	protein_coding	NA	72.4267	0.696284	0.206454	3.37259	0.00074465	0.00286339
2810002D19Rik	ENSMUSG00000045464	processed_transcript	NA	285.965	0.69549	0.10206	6.81452	9.46e-12	1.95e-10
NA	NA	NA	NA	194.42	0.695376	0.129258	5.37975	7.46e-08	7.57e-07
	ENSMUSG00000094728	protein_coding	NA	84.0917	0.695323	0.18032	3.85606	0.00011523	0.00055177
Gm30835	ENSMUSG00000105068	lincRNA	NA	82.232	0.694655	0.23193	2.99511	0.00274345	0.00886249
Cntln	ENSMUSG00000038070	protein_coding	338349	247.825	0.693621	0.18893	3.67132	0.0002413	0.00106384
Tnnc1	ENSMUSG00000091898	protein_coding	21924	76.0497	0.692693	0.204453	3.38803	0.00070396	0.00272773
Zfp947	ENSMUSG00000063383	protein_coding	210853	451.76	0.691809	0.0907572	7.62264	2.49e-14	7.39e-13
mt-Rnr1	ENSMUSG00000064337	Mt_rRNA	NA	51825.7	0.688978	0.110657	6.22625	4.78e-10	7.31e-09
Ptpn6	ENSMUSG00000004266	protein_coding	15170	86.566	0.688482	0.181315	3.79715	0.00014637	0.00068298
NA	NA	NA	NA	572.967	0.686992	0.128679	5.33881	9.36e-08	9.24e-07
NA	NA	NA	NA	224.018	0.686712	0.182795	3.75673	0.00017215	0.00078668
Pros1	ENSMUSG00000022912	protein_coding	19128	528.791	0.686385	0.138439	4.95804	7.12e-07	5.79e-06
NA	NA	NA	NA	35.1841	0.680544	0.276616	2.46025	0.013884	0.0357281
Arhgap27os1	ENSMUSG00000085733	antisense	NA	66.3094	0.680543	0.183422	3.71025	0.00020706	0.00092751
Catsperd	ENSMUSG00000040828	protein_coding	106757	31.0169	0.680061	0.255643	2.6602	0.00780951	0.0218777
Gxylt2	ENSMUSG00000030074	protein_coding	232313	2119.49	0.677597	0.115819	5.8505	4.9e-09	6.28e-08
NA	NA	NA	NA	83.5517	0.676442	0.181807	3.72066	0.0001987	0.00089517
Lactb2	ENSMUSG00000025937	protein_coding	212442	967.799	0.675347	0.081476	8.28891	1.14e-16	4.64e-15
1700120G11Rik	ENSMUSG00000086068	lincRNA	NA	231.748	0.673923	0.10909	6.17771	6.5e-10	9.81e-09
Gm28809	ENSMUSG00000101191	antisense	NA	130.805	0.673791	0.155914	4.32155	1.55e-05	9.27e-05
Gm10925	ENSMUSG00000100862	unprocessed_pseudogene	NA	547.263	0.671205	0.119	5.64038	1.7e-08	1.96e-07
Snora43	ENSMUSG00000064858	snoRNA	NA	594.555	0.670141	0.0751365	8.91897	4.71e-19	2.62e-17
9330020H09Rik	ENSMUSG00000091050	antisense	NA	157.356	0.6687	0.153897	4.34511	1.39e-05	8.43e-05
Ctso	ENSMUSG00000028015	protein_coding	229445	285.485	0.668556	0.142932	4.67745	2.9e-06	2.07e-05
Zfp866	ENSMUSG00000043090	protein_coding	330788	529.216	0.666452	0.0909443	7.32814	2.33e-13	6.07e-12
Nt5dc1	ENSMUSG00000039480	protein_coding	319638	282.318	0.666321	0.17262	3.86004	0.00011337	0.00054353
Mfsd4b4	ENSMUSG00000096687	protein_coding	NA	456.979	0.66221	0.114105	5.80352	6.49e-09	8.12e-08
Sh3tc2	ENSMUSG00000045629	protein_coding	225608	100.562	0.661956	0.20573	3.21759	0.00129274	0.00461835
NA	NA	NA	NA	224.871	0.660555	0.195937	3.37126	0.00074826	0.00287438
Csf1	ENSMUSG00000014599	protein_coding	NA	22622.2	0.659575	0.0814699	8.09594	5.68e-16	2.11e-14
Nphp3	ENSMUSG00000032558	protein_coding	74025	861.861	0.659456	0.0744405	8.85883	8.09e-19	4.34e-17
Onecut2	ENSMUSG00000045991	protein_coding	225631	485.584	0.657443	0.085863	7.65689	1.9e-14	5.73e-13
Gm45053	ENSMUSG00000108368	TEC	NA	240.806	0.654302	0.122342	5.34816	8.89e-08	8.85e-07
Tmem260	ENSMUSG00000036339	protein_coding	218989	869.168	0.653804	0.0887796	7.36435	1.78e-13	4.76e-12
Gm16567	ENSMUSG00000089961	antisense	NA	1184.54	0.652754	0.172872	3.77594	0.0001594	0.00073567
Kcnq1ot1	ENSMUSG00000101609	antisense	NA	277.365	0.650781	0.134578	4.83573	1.33e-06	1.02e-05
NA	NA	NA	NA	271.591	0.648403	0.180766	3.58697	0.00033454	0.00141541
2310009B15Rik	ENSMUSG00000079283	protein_coding	NA	208.54	0.646911	0.164624	3.92964	8.51e-05	0.00042124
Nat2	ENSMUSG00000051147	protein_coding	NA	85.7368	0.646721	0.194448	3.32592	0.00088126	0.00331717
Gsto2	ENSMUSG00000025069	protein_coding	68214	111.3	0.645657	0.177421	3.63911	0.00027358	0.00118823
Gm11839	ENSMUSG00000083246	processed_pseudogene	NA	37.8473	0.643619	0.262569	2.45124	0.0142367	0.0364856
Smim8	ENSMUSG00000028295	protein_coding	NA	207.289	0.64241	0.141503	4.53992	5.63e-06	3.73e-05
Gm43858	ENSMUSG00000104546	TEC	NA	46.4626	0.639779	0.265819	2.40682	0.0160919	0.0404516
Gm28661	ENSMUSG00000102070	unprocessed_pseudogene	NA	451.651	0.638973	0.161076	3.96691	7.28e-05	0.00036631
Loxl4	ENSMUSG00000025185	protein_coding	67573	1104.37	0.638877	0.11485	5.56271	2.66e-08	2.95e-07
Adh7	ENSMUSG00000055301	protein_coding	NA	1541.34	0.638598	0.0727092	8.7829	1.59e-18	8.26e-17
4933407K13Rik	ENSMUSG00000087396	processed_transcript	NA	359.525	0.638597	0.132854	4.80677	1.53e-06	1.15e-05
Ncapg	ENSMUSG00000015880	protein_coding	54392	575.232	0.638333	0.136866	4.66393	3.1e-06	2.2e-05
NA	NA	NA	NA	204.95	0.637422	0.125887	5.06343	4.12e-07	3.51e-06
Hdac9	ENSMUSG00000004698	protein_coding	79221	122.274	0.637027	0.16543	3.85074	0.00011776	0.00056162
Snord60	ENSMUSG00000064768	snoRNA	NA	177.448	0.636619	0.135953	4.68265	2.83e-06	2.03e-05
Armt1	ENSMUSG00000061759	protein_coding	73419	805.643	0.63461	0.0752328	8.43529	3.3e-17	1.46e-15
Actg2	ENSMUSG00000059430	protein_coding	11468	182.976	0.634444	0.20719	3.06213	0.00219765	0.00732091
3110056K07Rik	ENSMUSG00000085622	processed_transcript	NA	69.1102	0.632629	0.220994	2.86266	0.00420106	0.0127922
Tasor	ENSMUSG00000040651	protein_coding	218850	2197.11	0.63253	0.122563	5.16086	2.46e-07	2.21e-06
Zmat1	ENSMUSG00000052676	protein_coding	NA	143.128	0.63083	0.213857	2.94977	0.00318008	0.0101021
Uvssa	ENSMUSG00000037355	protein_coding	71101	747.075	0.628784	0.0947552	6.63588	3.23e-11	6.1e-10
Chek2	ENSMUSG00000029521	protein_coding	50883	640.058	0.627763	0.0939351	6.68294	2.34e-11	4.52e-10
Gas2	ENSMUSG00000030498	protein_coding	14453	484.146	0.62765	0.0913883	6.86795	6.51e-12	1.37e-10
Pik3ip1	ENSMUSG00000034614	protein_coding	216505	275.023	0.627045	0.145706	4.30349	1.68e-05	9.96e-05
Cenpk	ENSMUSG00000021714	protein_coding	60411	132.842	0.626679	0.198442	3.158	0.00158854	0.00553471
Fam117a	ENSMUSG00000038893	protein_coding	215512	376.845	0.626482	0.0968153	6.4709	9.74e-11	1.67e-09
Idh1	ENSMUSG00000025950	protein_coding	15926	1002.21	0.625954	0.135413	4.62255	3.79e-06	2.62e-05
Sesn3	ENSMUSG00000032009	protein_coding	75747	919.584	0.624817	0.122092	5.11757	3.1e-07	2.72e-06
Vdr	ENSMUSG00000022479	protein_coding	22337	471.4	0.624747	0.109746	5.69264	1.25e-08	1.48e-07
Gm31718	ENSMUSG00000110697	lincRNA	NA	188.481	0.624106	0.118887	5.24957	1.52e-07	1.43e-06
Gm21926	ENSMUSG00000116995	transcribed_processed_pseudogene	NA	661.313	0.623866	0.0717144	8.69932	3.34e-18	1.65e-16
2310015A10Rik	ENSMUSG00000097729	processed_transcript	NA	64.9783	0.623634	0.202966	3.0726	0.002122	0.00710151
Gm26542	ENSMUSG00000097887	antisense	NA	58.8088	0.618743	0.201544	3.07001	0.00214049	0.00715154
NA	NA	NA	NA	39.2047	0.61645	0.245331	2.51273	0.0119801	0.0315081
Katnal2	ENSMUSG00000025420	protein_coding	71206	77.2307	0.615706	0.26308	2.34037	0.0192644	0.0470122
Gm37074	ENSMUSG00000103685	TEC	NA	34.8893	0.615695	0.241094	2.55376	0.0106568	0.02844
Kcnk2	ENSMUSG00000037624	protein_coding	16526	505.447	0.615101	0.0902964	6.81202	9.62e-12	1.98e-10
Rinl	ENSMUSG00000051735	protein_coding	320435	39.3901	0.610753	0.234272	2.60703	0.00913317	0.0249614
NA	NA	NA	NA	3638.31	0.610483	0.0883555	6.9094	4.87e-12	1.04e-10
Chchd5	ENSMUSG00000037938	protein_coding	NA	432.113	0.607728	0.124309	4.88886	1.01e-06	7.99e-06
Igfbp6	ENSMUSG00000023046	protein_coding	NA	801.4	0.6058	0.153477	3.94719	7.91e-05	0.00039433
A530040E14Rik	ENSMUSG00000072109	antisense	NA	639.855	0.603619	0.0979003	6.16565	7.02e-10	1.05e-08
Manea	ENSMUSG00000040520	protein_coding	242362	1234.35	0.603259	0.120478	5.00721	5.52e-07	4.58e-06
Acot2	ENSMUSG00000021226	protein_coding	171210	1495.39	0.603122	0.112938	5.3403	9.28e-08	9.18e-07
Tigd3	ENSMUSG00000044390	protein_coding	NA	131.444	0.602254	0.178208	3.37949	0.00072621	0.00279839
NA	NA	NA	NA	1736.23	0.600558	0.146232	4.10689	4.01e-05	0.00021705
Zfp935	ENSMUSG00000055228	protein_coding	NA	543.576	0.600434	0.0800972	7.49632	6.56e-14	1.86e-12
Ecm2	ENSMUSG00000043631	protein_coding	407800	50.6846	0.599442	0.213434	2.80856	0.00497638	0.0147663
1700001L05Rik	ENSMUSG00000075511	lincRNA	NA	313.804	0.598409	0.177661	3.36826	0.00075645	0.00290197
Tspan8	ENSMUSG00000034127	protein_coding	216350	435.275	0.597579	0.104813	5.70139	1.19e-08	1.41e-07
Gm42067	ENSMUSG00000110156	antisense	NA	74.6228	0.597217	0.185689	3.21622	0.0012989	0.00463353
Acad10	ENSMUSG00000029456	protein_coding	71985	147.603	0.594768	0.145656	4.08337	4.44e-05	0.00023733
Zcwpw1	ENSMUSG00000037108	protein_coding	381678	298.028	0.590206	0.111498	5.29343	1.2e-07	1.16e-06
Abcc10	ENSMUSG00000032842	protein_coding	NA	301.391	0.589377	0.121253	4.86071	1.17e-06	9.09e-06
2310058D17Rik	ENSMUSG00000085379	processed_transcript	NA	82.6677	0.588629	0.164218	3.58445	0.00033779	0.00142616
Usp18	ENSMUSG00000030107	protein_coding	24110	1135.87	0.585976	0.093387	6.2747	3.5e-10	5.45e-09
Harbi1	ENSMUSG00000027243	protein_coding	241547	300.611	0.584434	0.0999873	5.84508	5.06e-09	6.48e-08
NA	NA	NA	NA	51.6801	0.58406	0.218319	2.67526	0.00746708	0.0210361
Hcfc1	ENSMUSG00000031386	protein_coding	NA	5911.4	0.583165	0.109111	5.34472	9.06e-08	8.98e-07
D6Ertd527e	ENSMUSG00000090891	protein_coding	NA	91.7391	0.582444	0.170456	3.41698	0.00063319	0.00247506
Cenpq	ENSMUSG00000023919	protein_coding	83815	333.233	0.582169	0.126265	4.61068	4.01e-06	2.76e-05
Cpt2	ENSMUSG00000028607	protein_coding	12896	431.814	0.582093	0.106784	5.45113	5.01e-08	5.24e-07
Nudt17	ENSMUSG00000028100	protein_coding	NA	76.1251	0.580997	0.18912	3.0721	0.00212557	0.00710955
Tmem126b	ENSMUSG00000030614	protein_coding	68472	472.171	0.580729	0.0962396	6.0342	1.6e-09	2.25e-08
Lipa	ENSMUSG00000024781	protein_coding	16889	1795.66	0.580183	0.0716351	8.09915	5.53e-16	2.06e-14
Ogt	ENSMUSG00000034160	protein_coding	NA	6047.61	0.577484	0.107218	5.38608	7.2e-08	7.34e-07
Amacr	ENSMUSG00000022244	protein_coding	17117	270.504	0.577407	0.145895	3.95769	7.57e-05	0.00037886
Clybl	ENSMUSG00000025545	protein_coding	69634	192.344	0.574421	0.155721	3.68878	0.00022533	0.00099976
Gm15943	ENSMUSG00000086801	antisense	NA	245.465	0.572591	0.147481	3.88248	0.0001034	0.00050129
Gdf15	ENSMUSG00000038508	protein_coding	NA	1675.95	0.571799	0.155005	3.68892	0.00022521	0.00099946
Pwwp3b	ENSMUSG00000042515	protein_coding	NA	309.139	0.570389	0.121144	4.70837	2.5e-06	1.81e-05
Mettl21a	ENSMUSG00000025956	protein_coding	NA	533.448	0.569805	0.0972025	5.86204	4.57e-09	5.9e-08
Lin9	ENSMUSG00000058729	protein_coding	72568	282.501	0.569803	0.17597	3.23807	0.00120342	0.00435255
Zkscan8	ENSMUSG00000063894	protein_coding	93681	540.61	0.569636	0.119558	4.7645	1.89e-06	1.4e-05
Nlrp4e	ENSMUSG00000045693	protein_coding	446099	320.208	0.567338	0.110475	5.13543	2.81e-07	2.5e-06
Zfp770	ENSMUSG00000040321	protein_coding	NA	682.028	0.566003	0.116439	4.86093	1.17e-06	9.08e-06
2900052L18Rik	ENSMUSG00000043993	processed_transcript	NA	241.283	0.565656	0.121355	4.66118	3.14e-06	2.22e-05
Ctbs	ENSMUSG00000028189	protein_coding	74245	337.621	0.563872	0.112715	5.00262	5.66e-07	4.69e-06
Gm26616	ENSMUSG00000102425	TEC	NA	144.225	0.560956	0.184474	3.04084	0.00235918	0.00777621
Cc2d2a	ENSMUSG00000039765	protein_coding	231214	204.292	0.55943	0.152752	3.66235	0.00024991	0.00109843
B230398E01Rik	ENSMUSG00000087660	antisense	NA	323.412	0.555046	0.0913723	6.07455	1.24e-09	1.79e-08
Bbof1	ENSMUSG00000057265	protein_coding	72873	151.05	0.554695	0.139634	3.97248	7.11e-05	0.00035865
Calr3	ENSMUSG00000019732	protein_coding	73316	206.341	0.554487	0.151991	3.64816	0.00026413	0.00115271
Nek8	ENSMUSG00000017405	protein_coding	NA	291.728	0.554116	0.14757	3.75494	0.00017338	0.00079172
Pex12	ENSMUSG00000018733	protein_coding	103737	307.917	0.552722	0.0925128	5.97455	2.31e-09	3.14e-08
Ube2c	ENSMUSG00000001403	protein_coding	NA	912.908	0.552664	0.187355	2.94982	0.00317961	0.0101021
Serpina1d	ENSMUSG00000071177	protein_coding	20703	1097.03	0.552415	0.111668	4.94692	7.54e-07	6.09e-06
Tnfrsf14	ENSMUSG00000042333	protein_coding	NA	235.521	0.552149	0.141867	3.89201	9.94e-05	0.00048355
D130040H23Rik	ENSMUSG00000079038	protein_coding	211135	451.785	0.552013	0.118625	4.65342	3.26e-06	2.3e-05
Zfp97	ENSMUSG00000095990	protein_coding	NA	227.891	0.551883	0.120365	4.58508	4.54e-06	3.09e-05
4931406C07Rik	ENSMUSG00000031938	protein_coding	70984	838.469	0.550249	0.0894551	6.15112	7.69e-10	1.15e-08
Arl5c	ENSMUSG00000038352	protein_coding	217151	156.096	0.549825	0.143555	3.83005	0.00012812	0.00060544
A330009N23Rik	ENSMUSG00000097915	antisense	NA	101.707	0.548672	0.167375	3.2781	0.00104508	0.00384582
1110035H17Rik	ENSMUSG00000099098	antisense	NA	150.353	0.548137	0.170318	3.21831	0.00128949	0.00460875
Gm49227	ENSMUSG00000115469	antisense	NA	461.702	0.547642	0.0991537	5.52317	3.33e-08	3.61e-07
Rfx5	ENSMUSG00000005774	protein_coding	53970	718.718	0.546818	0.0856579	6.38374	1.73e-10	2.81e-09
Tvp23b	ENSMUSG00000014177	protein_coding	67510	799.104	0.546523	0.08845	6.17889	6.46e-10	9.74e-09
Psd3	ENSMUSG00000030465	protein_coding	234353	314.971	0.545872	0.115709	4.71763	2.39e-06	1.74e-05
Aldh6a1	ENSMUSG00000021238	protein_coding	104776	634.959	0.545066	0.123485	4.41403	1.01e-05	6.36e-05
Xdh	ENSMUSG00000024066	protein_coding	22436	8090.52	0.544866	0.0743846	7.32499	2.39e-13	6.2e-12
Ptpn14	ENSMUSG00000026604	protein_coding	19250	3437.14	0.544519	0.115864	4.69965	2.61e-06	1.88e-05
Snord49a	ENSMUSG00000065734	snoRNA	NA	113.074	0.544181	0.164497	3.30816	0.00093913	0.00350641
NA	NA	NA	NA	398.45	0.544173	0.102969	5.28482	1.26e-07	1.21e-06
Gyg	ENSMUSG00000019528	protein_coding	27357	1436.63	0.54383	0.0836438	6.50173	7.94e-11	1.38e-09
Gm11427	ENSMUSG00000083161	transcribed_unprocessed_pseudogene	NA	535.855	0.543243	0.093859	5.78787	7.13e-09	8.84e-08
1810034E14Rik	ENSMUSG00000097101	antisense	NA	64.1238	0.540303	0.226944	2.38078	0.0172759	0.0429445
Lrrc28	ENSMUSG00000030556	protein_coding	67867	584.219	0.540244	0.0945658	5.71289	1.11e-08	1.33e-07
Clec2d	ENSMUSG00000030157	protein_coding	93694	222.331	0.540014	0.216855	2.49021	0.0127667	0.0332874
Cnbd2	ENSMUSG00000038085	protein_coding	70873	653.965	0.538997	0.137919	3.90808	9.3e-05	0.0004564
F5	ENSMUSG00000026579	protein_coding	14067	132.475	0.538617	0.171366	3.14308	0.00167183	0.00577829
Habp4	ENSMUSG00000021476	protein_coding	56541	1188.28	0.538386	0.0606846	8.87186	7.19e-19	3.92e-17
Mmp28	ENSMUSG00000020682	protein_coding	NA	413.254	0.538024	0.102705	5.23854	1.62e-07	1.51e-06
1700027H10Rik	ENSMUSG00000100799	antisense	NA	57.2723	0.537073	0.189023	2.84131	0.00449285	0.0135341
NA	NA	NA	NA	53.8425	0.536941	0.21536	2.49322	0.012659	0.0330587
NA	NA	NA	NA	180.203	0.536655	0.158491	3.38603	0.00070912	0.00274538
Rft1	ENSMUSG00000052395	protein_coding	328370	673.988	0.536266	0.0834967	6.42261	1.34e-10	2.23e-09
Fyb2	ENSMUSG00000078612	protein_coding	242594	282.79	0.535593	0.128332	4.17348	3e-05	0.0001673
Vps52	ENSMUSG00000024319	protein_coding	224705	1371.1	0.534566	0.0666743	8.01757	1.08e-15	3.86e-14
Tubb5	ENSMUSG00000001525	protein_coding	22154	27523	0.530288	0.0787309	6.73544	1.63e-11	3.25e-10
Pts	ENSMUSG00000032067	protein_coding	NA	641.418	0.528627	0.103156	5.12455	2.98e-07	2.63e-06
Ptgs2os2	ENSMUSG00000097754	lincRNA	NA	517.411	0.528379	0.124382	4.24803	2.16e-05	0.00012448
Timeless	ENSMUSG00000039994	protein_coding	21853	720.411	0.528358	0.144623	3.65335	0.00025884	0.00113347
NA	NA	NA	NA	208.378	0.528284	0.153119	3.45014	0.0005603	0.00222111
H2bc4	ENSMUSG00000018102	protein_coding	68024	452.188	0.527321	0.137944	3.82272	0.00013199	0.00062147
Gm26782	ENSMUSG00000097431	antisense	NA	281.623	0.526612	0.122779	4.28912	1.79e-05	0.0001057
Resf1	ENSMUSG00000032712	protein_coding	67246	3532.27	0.526484	0.105096	5.00957	5.46e-07	4.54e-06
Plk1	ENSMUSG00000030867	protein_coding	NA	417.521	0.525614	0.182316	2.88298	0.00393937	0.0121256
Gm5526	ENSMUSG00000084817	processed_pseudogene	NA	750.3	0.524585	0.071372	7.35001	1.98e-13	5.26e-12
Wdpcp	ENSMUSG00000020319	protein_coding	216560	212.844	0.523586	0.140556	3.7251	0.00019524	0.0008811
Brca2	ENSMUSG00000041147	protein_coding	12190	606.905	0.521215	0.0992472	5.25169	1.51e-07	1.42e-06
NA	NA	NA	NA	120.612	0.518913	0.152707	3.39811	0.00067854	0.00263711
Poglut3	ENSMUSG00000034487	protein_coding	68304	874.644	0.518014	0.094462	5.48383	4.16e-08	4.43e-07
NA	NA	NA	NA	620.384	0.517667	0.208245	2.48585	0.0129243	0.033654
Pitpnc1	ENSMUSG00000040430	protein_coding	71795	1517.78	0.517353	0.119642	4.32416	1.53e-05	9.17e-05
Cox6a2	ENSMUSG00000030785	protein_coding	NA	332.497	0.517265	0.156209	3.31137	0.00092839	0.00347205
Abcb1a	ENSMUSG00000040584	protein_coding	18671	612.463	0.51565	0.102745	5.01875	5.2e-07	4.35e-06
Zmynd8	ENSMUSG00000039671	protein_coding	228880	3739.56	0.514579	0.0673491	7.64048	2.16e-14	6.48e-13
Shmt1	ENSMUSG00000020534	protein_coding	20425	1582.44	0.513846	0.0816697	6.29175	3.14e-10	4.93e-09
Nqo1	ENSMUSG00000003849	protein_coding	18104	3416.94	0.513143	0.116349	4.41038	1.03e-05	6.45e-05
Tango6	ENSMUSG00000041949	protein_coding	272538	414.149	0.51259	0.0830519	6.17192	6.75e-10	1.01e-08
Gm15398	ENSMUSG00000085456	lincRNA	NA	1506.38	0.512359	0.0623586	8.21634	2.1e-16	8.26e-15
Brdt	ENSMUSG00000029279	protein_coding	114642	163.427	0.512071	0.144766	3.53723	0.00040435	0.00166646
C3ar1	ENSMUSG00000040552	protein_coding	12267	293.765	0.511738	0.162401	3.15108	0.00162665	0.00564776
Hebp1	ENSMUSG00000042770	protein_coding	15199	1110.51	0.511483	0.0823488	6.21118	5.26e-10	8e-09
Fbxo30	ENSMUSG00000047648	protein_coding	71865	1825.68	0.511371	0.10864	4.70702	2.51e-06	1.82e-05
Arhgap33	ENSMUSG00000036882	protein_coding	233071	555.74	0.511035	0.111986	4.56339	5.03e-06	3.37e-05
Tlr2	ENSMUSG00000027995	protein_coding	24088	843.827	0.508887	0.129069	3.94275	8.06e-05	0.0004007
Tmem203	ENSMUSG00000078201	protein_coding	NA	197.03	0.508696	0.119806	4.24599	2.18e-05	0.00012534
Mrgpre	ENSMUSG00000048965	protein_coding	NA	321.587	0.507976	0.122775	4.13746	3.51e-05	0.00019271
Rbm15	ENSMUSG00000048109	protein_coding	NA	1422.16	0.504409	0.112407	4.48735	7.21e-06	4.66e-05
Trmt13	ENSMUSG00000033439	protein_coding	229780	1016.73	0.503822	0.0899633	5.6003	2.14e-08	2.42e-07
Septin11	ENSMUSG00000058013	protein_coding	52398	4797.22	0.501742	0.0681924	7.35775	1.87e-13	5e-12
Accs	ENSMUSG00000040272	protein_coding	NA	356.486	0.500959	0.0921989	5.43346	5.53e-08	5.74e-07
Ap5z1	ENSMUSG00000039623	protein_coding	NA	1257.37	0.500528	0.0630393	7.93994	2.02e-15	6.95e-14
Gm32618	ENSMUSG00000115317	lincRNA	NA	79.2855	0.499099	0.181951	2.74305	0.00608716	0.0176158
Cdk5rap1	ENSMUSG00000027487	protein_coding	66971	347.824	0.497858	0.0972801	5.11779	3.09e-07	2.72e-06
Ankrd24	ENSMUSG00000054708	protein_coding	NA	568.165	0.495677	0.0810609	6.11488	9.66e-10	1.41e-08
Casz1	ENSMUSG00000028977	protein_coding	69743	100.758	0.493626	0.150286	3.28457	0.00102137	0.00377156
Farp1	ENSMUSG00000025555	protein_coding	223254	345.073	0.493079	0.107406	4.59079	4.42e-06	3.01e-05
Arhgap27	ENSMUSG00000034255	protein_coding	544817	374.26	0.49289	0.0938844	5.24997	1.52e-07	1.43e-06
Socs2	ENSMUSG00000020027	protein_coding	216233	609.968	0.491235	0.084024	5.84637	5.02e-09	6.44e-08
4930566F21Rik	ENSMUSG00000107142	antisense	NA	90.645	0.490744	0.173131	2.83452	0.00458947	0.0137669
Hemk1	ENSMUSG00000032579	protein_coding	NA	261.569	0.48904	0.1215	4.02503	5.7e-05	0.00029614
Homez	ENSMUSG00000057156	protein_coding	239099	142.286	0.488692	0.167646	2.91502	0.00355662	0.0111115
Rcn2	ENSMUSG00000032320	protein_coding	26611	1639.01	0.488662	0.0663383	7.36622	1.76e-13	4.71e-12
Mir34a	ENSMUSG00000065493	miRNA	NA	129.875	0.488214	0.169799	2.87525	0.00403711	0.0123817
Wrn	ENSMUSG00000031583	protein_coding	22427	435.991	0.488008	0.107416	4.54315	5.54e-06	3.67e-05
Aldh1l2	ENSMUSG00000020256	protein_coding	216188	5637.13	0.486486	0.12993	3.74423	0.00018095	0.00082254
Bend6	ENSMUSG00000042182	protein_coding	320705	256.037	0.486413	0.141507	3.43737	0.00058739	0.00231811
Hnrnpa3	ENSMUSG00000059005	protein_coding	229279	2421.79	0.48583	0.0940413	5.16614	2.39e-07	2.15e-06
Zfp661	ENSMUSG00000034800	protein_coding	NA	235.998	0.48444	0.124806	3.88155	0.00010379	0.00050308
Tor1aip1	ENSMUSG00000026466	protein_coding	208263	2031.83	0.483962	0.084285	5.74197	9.36e-09	1.13e-07
1700051O22Rik	ENSMUSG00000103341	TEC	NA	87.993	0.481659	0.176083	2.7354	0.00623044	0.0179779
NA	NA	NA	NA	178.722	0.479959	0.144389	3.32406	0.00088716	0.00333571
Gm28731	ENSMUSG00000101555	antisense	NA	208.269	0.479077	0.168699	2.83983	0.00451371	0.0135823
Daam2	ENSMUSG00000040260	protein_coding	76441	499.733	0.478342	0.142855	3.34845	0.00081265	0.00308884
Epm2aip1	ENSMUSG00000046785	protein_coding	77781	1118.76	0.477686	0.122918	3.88621	0.00010182	0.00049458
NA	NA	NA	NA	454.666	0.476136	0.107421	4.43243	9.32e-06	5.88e-05
NA	NA	NA	NA	153.596	0.475453	0.153052	3.10648	0.00189329	0.00643463
Cpxm1	ENSMUSG00000027408	protein_coding	NA	54.8122	0.475384	0.196399	2.4205	0.0154991	0.0391741
Ift172	ENSMUSG00000038564	protein_coding	67661	1133.62	0.474982	0.0817844	5.80773	6.33e-09	7.94e-08
Stat2	ENSMUSG00000040033	protein_coding	20847	3367.21	0.473571	0.0977638	4.84404	1.27e-06	9.82e-06
Nmnat1	ENSMUSG00000028992	protein_coding	NA	209.188	0.473199	0.117149	4.03928	5.36e-05	0.00028039
Ptrh2	ENSMUSG00000072582	protein_coding	217057	2016.57	0.472465	0.0870271	5.42894	5.67e-08	5.87e-07
Ttc8	ENSMUSG00000021013	protein_coding	76260	433.501	0.472447	0.117259	4.0291	5.6e-05	0.00029164
NA	NA	NA	NA	265.731	0.47076	0.199767	2.35654	0.018446	0.0453513
Peg10	ENSMUSG00000092035	protein_coding	NA	1628.68	0.470175	0.107721	4.36475	1.27e-05	7.79e-05
NA	NA	NA	NA	87.264	0.470162	0.153645	3.06005	0.00221298	0.00736198
Trim7	ENSMUSG00000040350	protein_coding	94089	482.052	0.469212	0.0905775	5.18023	2.22e-07	2.01e-06
Dtx3l	ENSMUSG00000049502	protein_coding	209200	845.448	0.467946	0.137725	3.39769	0.00067957	0.00263884
Fam3c	ENSMUSG00000029672	protein_coding	27999	1654.49	0.467684	0.0565843	8.26527	1.39e-16	5.62e-15
Nlrc5	ENSMUSG00000074151	protein_coding	434341	1133.67	0.466409	0.105646	4.41483	1.01e-05	6.34e-05
Cutc	ENSMUSG00000025193	protein_coding	66388	104.86	0.466377	0.191257	2.43848	0.0147492	0.0375762
Lrba	ENSMUSG00000028080	protein_coding	80877	537.783	0.465658	0.121806	3.82295	0.00013186	0.00062104
Fbxo36	ENSMUSG00000073633	protein_coding	66153	171.501	0.464879	0.180376	2.57727	0.00995842	0.0268249
NA	NA	NA	NA	106.509	0.464521	0.144297	3.21921	0.00128544	0.00459608
Gm37545	ENSMUSG00000099610	processed_pseudogene	NA	140.158	0.464366	0.189457	2.45103	0.0142447	0.036501
Dguok	ENSMUSG00000014554	protein_coding	27369	574.492	0.463699	0.0962297	4.81867	1.45e-06	1.09e-05
Rhbdd1	ENSMUSG00000026142	protein_coding	76867	3302.62	0.462959	0.0871715	5.3109	1.09e-07	1.06e-06
Rida	ENSMUSG00000022323	protein_coding	15473	871.516	0.462083	0.077091	5.994	2.05e-09	2.83e-08
Tug1	ENSMUSG00000056579	protein_coding	NA	6340.69	0.461068	0.0837152	5.50758	3.64e-08	3.92e-07
Nek4	ENSMUSG00000021918	protein_coding	23955	682.219	0.460293	0.0857261	5.36934	7.9e-08	7.95e-07
Phyh	ENSMUSG00000026664	protein_coding	16922	430.43	0.460137	0.0881519	5.21982	1.79e-07	1.66e-06
Clic4	ENSMUSG00000037242	protein_coding	29876	7828.64	0.45962	0.0798075	5.75911	8.46e-09	1.03e-07
Hoxa13	ENSMUSG00000038203	protein_coding	NA	204.858	0.459231	0.117637	3.90379	9.47e-05	0.00046382
Adamts10	ENSMUSG00000024299	protein_coding	224697	762.934	0.458478	0.0934521	4.90601	9.29e-07	7.38e-06
Ly6e	ENSMUSG00000022587	protein_coding	17069	3443.47	0.457943	0.118488	3.86489	0.00011114	0.00053412
Strn	ENSMUSG00000024077	protein_coding	268980	1583.8	0.455641	0.121431	3.75225	0.00017525	0.0007984
NA	NA	NA	NA	209.808	0.455058	0.10737	4.23824	2.25e-05	0.00012926
Fndc10	ENSMUSG00000074738	protein_coding	NA	268.425	0.454917	0.16548	2.74908	0.00597636	0.0173366
Zfp971	ENSMUSG00000074519	protein_coding	626848	1313.19	0.454053	0.0882547	5.1448	2.68e-07	2.38e-06
Kif5a	ENSMUSG00000074657	protein_coding	16572	70.0318	0.453144	0.15549	2.9143	0.00356489	0.0111334
C630043F03Rik	ENSMUSG00000084910	processed_transcript	NA	246.928	0.453125	0.132373	3.42309	0.00061915	0.00242919
Sptbn2	ENSMUSG00000067889	protein_coding	NA	242.157	0.452858	0.160858	2.81527	0.00487359	0.0145026
4930597O21Rik	ENSMUSG00000053442	processed_transcript	NA	117.313	0.452162	0.156519	2.88887	0.00386626	0.0119329
NA	NA	NA	NA	67.6525	0.45127	0.182852	2.46795	0.013589	0.0350716
Nepro	ENSMUSG00000036208	protein_coding	212547	905.731	0.450694	0.0961916	4.68538	2.79e-06	2e-05
Gm17491	ENSMUSG00000097042	sense_intronic	NA	632.936	0.450135	0.0812982	5.53683	3.08e-08	3.37e-07
Trps1	ENSMUSG00000038679	protein_coding	83925	1507.64	0.447398	0.11584	3.86221	0.00011237	0.00053944
NA	NA	NA	NA	129.401	0.445092	0.140086	3.17729	0.00148661	0.00521967
Vill	ENSMUSG00000038775	protein_coding	22351	238.899	0.44493	0.117555	3.78488	0.00015378	0.00071318
Cstf3	ENSMUSG00000027176	protein_coding	228410	1132.89	0.444111	0.0686795	6.46642	1e-10	1.71e-09
Irf6	ENSMUSG00000026638	protein_coding	54139	283.827	0.443445	0.11191	3.9625	7.42e-05	0.00037243
Zfp799	ENSMUSG00000095253	protein_coding	240064	446.687	0.44274	0.1275	3.47246	0.00051572	0.0020681
Nat14	ENSMUSG00000035285	protein_coding	NA	157.544	0.440502	0.135304	3.25564	0.00113136	0.0041201
Slc38a9	ENSMUSG00000047789	protein_coding	268706	836.888	0.440005	0.0600055	7.33273	2.26e-13	5.89e-12
Gm11884	ENSMUSG00000087098	lincRNA	NA	1655.17	0.439854	0.11382	3.86447	0.00011133	0.00053481
Vmn1r112	ENSMUSG00000094284	protein_coding	NA	178.055	0.439125	0.133009	3.30146	0.00096183	0.00358307
Zfp120	ENSMUSG00000068134	protein_coding	104348	628.269	0.439033	0.084533	5.19363	2.06e-07	1.88e-06
Caskin1	ENSMUSG00000033597	protein_coding	268932	221.375	0.438777	0.13137	3.34001	0.00083775	0.00316765
4833418N02Rik	ENSMUSG00000085287	processed_transcript	NA	140.144	0.436754	0.14841	2.94289	0.00325166	0.0102988
Son	ENSMUSG00000022961	protein_coding	20658	9143.33	0.435177	0.10523	4.13548	3.54e-05	0.0001942
Oasl2	ENSMUSG00000029561	protein_coding	23962	1901.97	0.434779	0.119671	3.63311	0.00028002	0.0012139
Zfp281	ENSMUSG00000041483	protein_coding	226442	1128.54	0.433789	0.103494	4.19143	2.77e-05	0.00015579
Scrn3	ENSMUSG00000008226	protein_coding	74616	348.524	0.432131	0.114954	3.75918	0.00017047	0.00077961
Gca	ENSMUSG00000026893	protein_coding	227960	145.694	0.431509	0.134138	3.2169	0.00129584	0.00462505
Trpt1	ENSMUSG00000047656	protein_coding	NA	365.096	0.431488	0.107141	4.02731	5.64e-05	0.00029362
Syk	ENSMUSG00000021457	protein_coding	20963	386.032	0.431287	0.120387	3.5825	0.00034032	0.00143549
Pan2	ENSMUSG00000005682	protein_coding	103135	2652.57	0.429076	0.0614383	6.98386	2.87e-12	6.38e-11
Phkb	ENSMUSG00000036879	protein_coding	102093	622.663	0.428986	0.103807	4.13253	3.59e-05	0.00019641
Zbtb25	ENSMUSG00000056459	protein_coding	109929	421.808	0.428572	0.0866649	4.94517	7.61e-07	6.13e-06
Taok3	ENSMUSG00000061288	protein_coding	330177	2639.27	0.42834	0.0678494	6.3131	2.73e-10	4.33e-09
Nufip2	ENSMUSG00000037857	protein_coding	68564	3245.49	0.428059	0.0977605	4.37865	1.19e-05	7.36e-05
Nedd9	ENSMUSG00000021365	protein_coding	18003	954.46	0.426098	0.0783633	5.43747	5.4e-08	5.62e-07
Cdon	ENSMUSG00000038119	protein_coding	57810	370.228	0.425728	0.17696	2.40579	0.0161376	0.0405239
Cenpe	ENSMUSG00000045328	protein_coding	229841	447.751	0.425569	0.178925	2.37847	0.0173848	0.043181
Plekhm3	ENSMUSG00000051344	protein_coding	241075	833.378	0.424715	0.0991082	4.28537	1.82e-05	0.00010735
Col20a1	ENSMUSG00000016356	protein_coding	73368	812.023	0.423769	0.0789441	5.36796	7.96e-08	7.99e-07
Tepp	ENSMUSG00000090206	protein_coding	73407	101.239	0.423728	0.172597	2.45502	0.0140878	0.0361655
Wnk4	ENSMUSG00000035112	protein_coding	69847	460.038	0.423009	0.105072	4.02592	5.68e-05	0.00029528
Gm15545	ENSMUSG00000087138	antisense	NA	553.173	0.42041	0.0890602	4.72051	2.35e-06	1.71e-05
App	ENSMUSG00000022892	protein_coding	11820	6029.35	0.419442	0.0617994	6.78715	1.14e-11	2.32e-10
Bphl	ENSMUSG00000038286	protein_coding	68021	516.529	0.419036	0.133956	3.12816	0.00175907	0.00603894
Dync2li1	ENSMUSG00000024253	protein_coding	213575	243.365	0.418691	0.162888	2.57042	0.0101577	0.0272766
Klf2	ENSMUSG00000055148	protein_coding	NA	211.651	0.418218	0.179185	2.334	0.0195956	0.0476815
Alg12	ENSMUSG00000035845	protein_coding	223774	1729.43	0.417077	0.0960281	4.34328	1.4e-05	8.49e-05
Gm5913	ENSMUSG00000081111	processed_pseudogene	NA	89.6134	0.416851	0.179313	2.32471	0.0200874	0.0487134
Mppe1	ENSMUSG00000062526	protein_coding	225651	266.359	0.415944	0.112204	3.70704	0.0002097	0.00093725
Zc3h12b	ENSMUSG00000035045	protein_coding	NA	189.747	0.415479	0.135562	3.06486	0.00217769	0.00725976
Luc7l3	ENSMUSG00000020863	protein_coding	67684	2728.03	0.415338	0.0778353	5.33612	9.5e-08	9.38e-07
Rnf122	ENSMUSG00000039328	protein_coding	NA	146.655	0.414934	0.14362	2.8891	0.00386345	0.0119263
Notch1	ENSMUSG00000026923	protein_coding	18128	268.977	0.414594	0.0959854	4.31934	1.56e-05	9.35e-05
Tpk1	ENSMUSG00000029735	protein_coding	29807	120.586	0.414348	0.168684	2.45635	0.0140356	0.036062
Col9a3	ENSMUSG00000027570	protein_coding	12841	162.56	0.41337	0.115659	3.57406	0.00035149	0.0014768
Parvg	ENSMUSG00000022439	protein_coding	64099	280.827	0.412622	0.132557	3.1128	0.00185324	0.00631746
4921524J17Rik	ENSMUSG00000036934	protein_coding	66714	415.266	0.412347	0.100863	4.08819	4.35e-05	0.00023356
Casp4	ENSMUSG00000033538	protein_coding	12363	627.664	0.411633	0.108745	3.78531	0.00015351	0.00071211
Ifih1	ENSMUSG00000026896	protein_coding	71586	587.72	0.411527	0.118928	3.46031	0.00053956	0.00214874
Oga	ENSMUSG00000025220	protein_coding	76055	9387.2	0.410718	0.0747568	5.49406	3.93e-08	4.2e-07
Phf20	ENSMUSG00000038116	protein_coding	228829	3302.44	0.409527	0.0693581	5.90453	3.54e-09	4.65e-08
Ackr4	ENSMUSG00000079355	protein_coding	252837	136.862	0.40925	0.153044	2.67406	0.00749393	0.0210946
Cdk12	ENSMUSG00000003119	protein_coding	69131	2042.39	0.409042	0.10441	3.91763	8.94e-05	0.00044036
NA	NA	NA	NA	664.972	0.40838	0.115933	3.52255	0.00042741	0.00175037
Ccl25	ENSMUSG00000023235	protein_coding	20300	249.848	0.407848	0.110877	3.67838	0.00023472	0.00103836
Aen	ENSMUSG00000030609	protein_coding	NA	4194.29	0.406192	0.0781306	5.19889	2e-07	1.83e-06
Klhl42	ENSMUSG00000040102	protein_coding	232539	321.404	0.405004	0.108336	3.73839	0.0001852	0.00083957
Filip1l	ENSMUSG00000043336	protein_coding	78749	1446.52	0.404492	0.112335	3.60077	0.00031728	0.00135023
Larp1b	ENSMUSG00000025762	protein_coding	214048	724.734	0.404222	0.088915	4.54616	5.46e-06	3.63e-05
Gm16153	ENSMUSG00000085687	processed_transcript	NA	284.72	0.403164	0.112252	3.59161	0.00032865	0.00139339
Man2c1	ENSMUSG00000032295	protein_coding	NA	1608.69	0.402545	0.0599394	6.71585	1.87e-11	3.68e-10
Psmd14	ENSMUSG00000026914	protein_coding	59029	2689.82	0.402167	0.0632877	6.35459	2.09e-10	3.36e-09
Taf7	ENSMUSG00000051316	protein_coding	24074	441.374	0.401933	0.11653	3.44917	0.00056232	0.00222744
Uros	ENSMUSG00000030979	protein_coding	22276	344.834	0.40082	0.122583	3.26977	0.00107634	0.00394086
Zfp280c	ENSMUSG00000036916	protein_coding	NA	983.148	0.399566	0.113716	3.51373	0.00044186	0.00180099
Zfp758	ENSMUSG00000044501	protein_coding	224598	377.608	0.398724	0.107206	3.71924	0.00019982	0.00089933
Irgm1	ENSMUSG00000046879	protein_coding	15944	2157.95	0.398488	0.0968644	4.11387	3.89e-05	0.00021121
Fzd7	ENSMUSG00000041075	protein_coding	NA	1903.12	0.398392	0.0686754	5.80109	6.59e-09	8.22e-08
Ttll7	ENSMUSG00000036745	protein_coding	70892	626.306	0.39799	0.112733	3.53039	0.00041495	0.00170491
Slc40a1	ENSMUSG00000025993	protein_coding	NA	1449.49	0.394848	0.07635	5.17155	2.32e-07	2.09e-06
Rhob	ENSMUSG00000054364	protein_coding	NA	2001.99	0.394476	0.0968584	4.07271	4.65e-05	0.00024738
3300002I08Rik	ENSMUSG00000063364	protein_coding	69277	639.874	0.39427	0.102682	3.8397	0.00012318	0.00058487
Pctp	ENSMUSG00000020553	protein_coding	NA	212.609	0.393937	0.130896	3.00953	0.00261651	0.00849627
Chpf2	ENSMUSG00000038181	protein_coding	NA	5097.48	0.393931	0.0872611	4.51439	6.35e-06	4.17e-05
Ift88	ENSMUSG00000040040	protein_coding	21821	296.643	0.393337	0.120347	3.26835	0.00108177	0.00395756
NA	NA	NA	NA	105.502	0.39255	0.160263	2.44941	0.0143091	0.0366489
Tmem14a	ENSMUSG00000025933	protein_coding	NA	553.726	0.391209	0.116742	3.35105	0.00080507	0.00306478
Aasdh	ENSMUSG00000055923	protein_coding	231326	313.604	0.391172	0.138351	2.82738	0.004693	0.0140438
Mcm10	ENSMUSG00000026669	protein_coding	70024	280.368	0.391169	0.137906	2.83648	0.00456139	0.0137084
Smim4	ENSMUSG00000058351	protein_coding	66487	108.338	0.389277	0.147001	2.64813	0.00809394	0.0225472
Sgcb	ENSMUSG00000029156	protein_coding	NA	1317.53	0.388662	0.0705788	5.50678	3.65e-08	3.93e-07
Ap1g2	ENSMUSG00000040701	protein_coding	NA	391.991	0.387931	0.0828827	4.68048	2.86e-06	2.05e-05
Lrp11	ENSMUSG00000019796	protein_coding	237253	948.449	0.387815	0.0852642	4.5484	5.41e-06	3.59e-05
Crebl2	ENSMUSG00000032652	protein_coding	232430	926.202	0.386908	0.0832261	4.64888	3.34e-06	2.35e-05
Acss2	ENSMUSG00000027605	protein_coding	60525	412.038	0.385568	0.0824404	4.67693	2.91e-06	2.08e-05
Fam160a2	ENSMUSG00000044465	protein_coding	74349	950.839	0.385351	0.0722469	5.33381	9.62e-08	9.48e-07
Igfbp4	ENSMUSG00000017493	protein_coding	16010	6367.45	0.384688	0.11245	3.42096	0.00062401	0.00244403
Nipsnap1	ENSMUSG00000034285	protein_coding	18082	409.172	0.383293	0.108427	3.53504	0.00040772	0.00167804
Pdp2	ENSMUSG00000048371	protein_coding	NA	540.098	0.382625	0.116756	3.27714	0.00104863	0.00385748
1700023B13Rik	ENSMUSG00000117050	TEC	NA	892.664	0.382616	0.0852157	4.48997	7.12e-06	4.6e-05
NA	NA	NA	NA	223.157	0.382521	0.163644	2.33752	0.0194122	0.0473291
NA	NA	NA	NA	157.066	0.382363	0.126673	3.01851	0.00254024	0.00827973
Mfsd7a	ENSMUSG00000029490	protein_coding	NA	416.847	0.381529	0.115768	3.29563	0.000982	0.00364399
Zfp94	ENSMUSG00000074282	protein_coding	22756	204.81	0.380852	0.138959	2.74075	0.00612983	0.0177251
Tal1	ENSMUSG00000028717	protein_coding	NA	137.487	0.38079	0.143634	2.65111	0.00802271	0.0223851
Paxbp1	ENSMUSG00000022974	protein_coding	67367	3924.93	0.379851	0.084792	4.4798	7.47e-06	4.8e-05
Rab11fip2	ENSMUSG00000040022	protein_coding	74998	796.481	0.379747	0.140863	2.69587	0.00702047	0.0199414
Lat2	ENSMUSG00000040751	protein_coding	56743	172.909	0.379521	0.11402	3.32856	0.00087296	0.00329052
Cntrl	ENSMUSG00000057110	protein_coding	26920	559.063	0.377888	0.0898562	4.20548	2.61e-05	0.00014729
Kif7	ENSMUSG00000050382	protein_coding	NA	962.942	0.377741	0.0750277	5.0347	4.79e-07	4.03e-06
Ice2	ENSMUSG00000032235	protein_coding	93697	465.328	0.376764	0.106173	3.5486	0.00038728	0.00160596
Ugp2	ENSMUSG00000001891	protein_coding	216558	2990.19	0.375863	0.102456	3.66852	0.00024396	0.00107503
Zbtb34	ENSMUSG00000068966	protein_coding	241311	511.548	0.375537	0.128752	2.91675	0.00353702	0.0110635
Cox15	ENSMUSG00000040018	protein_coding	226139	1300.95	0.375208	0.0668779	5.61035	2.02e-08	2.3e-07
Exoc4	ENSMUSG00000029763	protein_coding	20336	3868.58	0.374757	0.0767335	4.88388	1.04e-06	8.17e-06
Bbs2	ENSMUSG00000031755	protein_coding	67378	443.306	0.373499	0.10557	3.53792	0.00040328	0.00166298
AA414768	ENSMUSG00000083307	processed_pseudogene	NA	251.529	0.373446	0.126244	2.95812	0.00309517	0.00987385
Atp11b	ENSMUSG00000037400	protein_coding	76295	2281.95	0.37312	0.0923241	4.04142	5.31e-05	0.00027825
Pidd1	ENSMUSG00000025507	protein_coding	NA	613.383	0.372609	0.0983601	3.78821	0.00015173	0.00070547
E430024I08Rik	ENSMUSG00000112964	lincRNA	NA	774.5	0.371833	0.0735874	5.05294	4.35e-07	3.7e-06
n-R5s189	ENSMUSG00000084624	rRNA	NA	1558.81	0.371818	0.098621	3.77018	0.00016313	0.00075096
AW549877	ENSMUSG00000041935	protein_coding	106064	5570.21	0.369539	0.125617	2.94179	0.00326326	0.0103283
E330011M16Rik	ENSMUSG00000103030	TEC	NA	158.438	0.368824	0.136168	2.7086	0.00675681	0.0193043
Dennd3	ENSMUSG00000036661	protein_coding	105841	426.367	0.367194	0.0879783	4.17369	3e-05	0.0001672
Gm14002	ENSMUSG00000086416	antisense	NA	251.679	0.365796	0.116398	3.14262	0.00167443	0.00578179
Setbp1	ENSMUSG00000024548	protein_coding	240427	758.471	0.365533	0.141292	2.58707	0.00967961	0.026213
Lyrm2	ENSMUSG00000045854	protein_coding	NA	299.763	0.365151	0.12034	3.03432	0.00241076	0.00791746
Coa4	ENSMUSG00000044881	protein_coding	NA	148.008	0.363817	0.150406	2.4189	0.0155674	0.0393129
Car5b	ENSMUSG00000031373	protein_coding	NA	649.204	0.363184	0.143109	2.53781	0.0111548	0.0295734
Ncam1	ENSMUSG00000039542	protein_coding	17967	488.407	0.363176	0.153382	2.36779	0.0178949	0.0441699
Nfyb	ENSMUSG00000020248	protein_coding	NA	1049.44	0.361778	0.0776853	4.65697	3.21e-06	2.27e-05
Pmf1	ENSMUSG00000028066	protein_coding	67037	510.656	0.361235	0.129604	2.78723	0.00531615	0.0156466
Pcyox1	ENSMUSG00000029998	protein_coding	66881	4572.44	0.358058	0.0692517	5.17038	2.34e-07	2.11e-06
Rc3h1	ENSMUSG00000040423	protein_coding	381305	1681.57	0.358003	0.0975079	3.67153	0.00024111	0.00106323
Zfp936	ENSMUSG00000064194	protein_coding	668620	524.678	0.357557	0.0758631	4.71319	2.44e-06	1.77e-05
Tmem205	ENSMUSG00000040883	protein_coding	NA	335.081	0.356573	0.150573	2.3681	0.0178796	0.0441381
NA	NA	NA	NA	298.612	0.355993	0.102157	3.48477	0.00049257	0.00198493
Zranb2	ENSMUSG00000028180	protein_coding	53861	3326.76	0.35565	0.0902301	3.94159	8.09e-05	0.00040232
BC048403	ENSMUSG00000053684	protein_coding	NA	691.464	0.355118	0.103263	3.43895	0.00058397	0.00230664
Dstyk	ENSMUSG00000042046	protein_coding	213452	1523.96	0.35492	0.114375	3.10313	0.00191487	0.00649618
NA	NA	NA	NA	236.995	0.354147	0.116693	3.03486	0.00240645	0.00790615
Tmem41a	ENSMUSG00000022856	protein_coding	66664	221.232	0.353825	0.136141	2.59895	0.0093509	0.0254415
Mex3c	ENSMUSG00000037253	protein_coding	240396	1780.11	0.353077	0.12022	2.93692	0.00331486	0.0104643
Prps2	ENSMUSG00000025742	protein_coding	NA	1136.59	0.352823	0.0798711	4.41741	9.99e-06	6.27e-05
Ranbp6	ENSMUSG00000074909	protein_coding	240614	529.814	0.352434	0.124209	2.83742	0.00454791	0.0136761
Mfap3	ENSMUSG00000020522	protein_coding	216760	1372.58	0.351818	0.0805784	4.36615	1.26e-05	7.75e-05
1700024B05Rik	ENSMUSG00000052334	protein_coding	NA	194.111	0.351069	0.130345	2.69338	0.00707307	0.0200687
Zbtb38	ENSMUSG00000040433	protein_coding	245007	1715.82	0.349558	0.134462	2.59969	0.00933093	0.0254097
Ccdc134	ENSMUSG00000068114	protein_coding	76457	915.633	0.348792	0.0969078	3.59922	0.00031918	0.00135768
Mycbp	ENSMUSG00000028647	protein_coding	56309	313.408	0.346715	0.119997	2.88937	0.00386017	0.0119182
Slc12a6	ENSMUSG00000027130	protein_coding	107723	3319.59	0.346576	0.0909127	3.81219	0.00013774	0.00064621
Tbc1d5	ENSMUSG00000023923	protein_coding	72238	1178.38	0.34524	0.0684451	5.04404	4.56e-07	3.86e-06
Gm17300	ENSMUSG00000091021	lincRNA	NA	755.836	0.34419	0.0819853	4.19819	2.69e-05	0.0001515
Dtd1	ENSMUSG00000027430	protein_coding	66044	303.532	0.3441	0.118342	2.90768	0.00364117	0.0113405
Mettl4	ENSMUSG00000055660	protein_coding	76781	461.442	0.341594	0.0908236	3.76107	0.00016919	0.0007749
Dnajc10	ENSMUSG00000027006	protein_coding	66861	3879.23	0.341583	0.0735831	4.64213	3.45e-06	2.41e-05
Ppp1r10	ENSMUSG00000039220	protein_coding	52040	2161.1	0.341501	0.0973905	3.50651	0.00045403	0.00184478
Ints2	ENSMUSG00000018068	protein_coding	70422	2410.87	0.341439	0.130275	2.62091	0.00876945	0.0241163
Tardbp	ENSMUSG00000041459	protein_coding	230908	5992.09	0.341341	0.0578406	5.90141	3.6e-09	4.73e-08
Sord	ENSMUSG00000027227	protein_coding	20322	3545.95	0.341018	0.0487058	7.00159	2.53e-12	5.67e-11
Tsku	ENSMUSG00000049580	protein_coding	NA	3711.76	0.340571	0.0806623	4.22217	2.42e-05	0.00013786
Bmt2	ENSMUSG00000042742	protein_coding	101148	1494.07	0.339796	0.10349	3.28338	0.00102571	0.0037853
Tpm2	ENSMUSG00000028464	protein_coding	NA	2957.95	0.339713	0.113077	3.00427	0.00266223	0.00862776
Pigp	ENSMUSG00000022940	protein_coding	56176	341.009	0.339394	0.117409	2.8907	0.0038438	0.0118757
Zfp975	ENSMUSG00000069727	protein_coding	434179	592.786	0.338943	0.0884436	3.8323	0.00012695	0.00060147
Cd276	ENSMUSG00000035914	protein_coding	102657	1118.68	0.338509	0.0801466	4.22363	2.4e-05	0.00013719
NA	NA	NA	NA	4288.89	0.33753	0.0931209	3.62464	0.00028936	0.00124842
Ifi27	ENSMUSG00000064215	protein_coding	52668	3504.97	0.336428	0.0824621	4.07979	4.51e-05	0.00024066
Add3	ENSMUSG00000025026	protein_coding	27360	1443.25	0.334963	0.0869186	3.85376	0.00011632	0.00055607
Mavs	ENSMUSG00000037523	protein_coding	228607	1451.93	0.334812	0.0586414	5.70948	1.13e-08	1.35e-07
Sh3bgrl	ENSMUSG00000031246	protein_coding	NA	2914.08	0.33399	0.0904081	3.69425	0.00022054	0.00098137
Stard5	ENSMUSG00000046027	protein_coding	170460	1320.51	0.332737	0.101758	3.2699	0.00107586	0.0039399
Prickle1	ENSMUSG00000036158	protein_coding	106042	279.181	0.332609	0.127033	2.61829	0.00883724	0.0242733
Zbtb1	ENSMUSG00000033454	protein_coding	268564	1148.58	0.332124	0.11199	2.96565	0.0030204	0.0096574
Cfap97	ENSMUSG00000031631	protein_coding	66756	556.41	0.331962	0.0954891	3.47644	0.00050811	0.00204122
Aplp2	ENSMUSG00000031996	protein_coding	11804	5601.14	0.33111	0.0730957	4.52981	5.9e-06	3.9e-05
Man2c1os	ENSMUSG00000086728	antisense	NA	281.084	0.330258	0.112608	2.93282	0.00335903	0.0105798
Gm44560	ENSMUSG00000108880	TEC	NA	281.452	0.329042	0.130482	2.52173	0.0116779	0.030807
Plin3	ENSMUSG00000024197	protein_coding	66905	3799.84	0.328612	0.0565218	5.81389	6.1e-09	7.67e-08
Arhgap31	ENSMUSG00000022799	protein_coding	12549	959.279	0.327809	0.127699	2.56704	0.010257	0.0275066
Tnfrsf1b	ENSMUSG00000028599	protein_coding	21938	2762.14	0.327592	0.0732807	4.47037	7.81e-06	4.99e-05
Cmbl	ENSMUSG00000022235	protein_coding	69574	284.273	0.327555	0.107561	3.04528	0.00232461	0.00767899
H2-DMb1	ENSMUSG00000079547	protein_coding	14999	211.221	0.327222	0.111609	2.93187	0.00336929	0.0106066
3830406C13Rik	ENSMUSG00000033111	protein_coding	218734	308.649	0.325929	0.11639	2.80032	0.00510512	0.0150941
Spata1	ENSMUSG00000028188	protein_coding	70951	163.02	0.325926	0.116008	2.80951	0.00496175	0.0147302
Tiparp	ENSMUSG00000034640	protein_coding	99929	8077.77	0.321841	0.107794	2.98569	0.00282938	0.00910765
Kpna4	ENSMUSG00000027782	protein_coding	16649	4770.36	0.321747	0.0854022	3.76743	0.00016494	0.00075845
Tmem64	ENSMUSG00000043252	protein_coding	NA	1702.07	0.321108	0.0839696	3.82409	0.00013125	0.00061865
Zfp956	ENSMUSG00000045466	protein_coding	101197	298.958	0.320725	0.0959789	3.34162	0.00083291	0.0031547
Ryk	ENSMUSG00000032547	protein_coding	20187	3582.32	0.320631	0.056124	5.71289	1.11e-08	1.33e-07
Lhfpl2	ENSMUSG00000045312	protein_coding	218454	5326.81	0.320375	0.0720387	4.44726	8.7e-06	5.51e-05
Lnpep	ENSMUSG00000023845	protein_coding	240028	4102.81	0.318051	0.0895567	3.5514	0.00038319	0.00159227
Vps26a	ENSMUSG00000020078	protein_coding	30930	5418.61	0.316115	0.0532412	5.93742	2.9e-09	3.87e-08
Nicn1	ENSMUSG00000032606	protein_coding	66257	1086.14	0.315877	0.0619657	5.09761	3.44e-07	2.99e-06
Gm20008	ENSMUSG00000117183	processed_pseudogene	NA	555.143	0.31493	0.0952678	3.30573	0.00094728	0.00353032
Sema3e	ENSMUSG00000063531	protein_coding	20349	321.577	0.314647	0.121615	2.58723	0.00967515	0.0262058
mt-Tp	ENSMUSG00000064372	Mt_tRNA	NA	92742.1	0.314436	0.093242	3.37226	0.00074554	0.0028662
Ephb6	ENSMUSG00000029869	protein_coding	13848	354.455	0.31351	0.127077	2.46709	0.0136215	0.0351423
Lhpp	ENSMUSG00000030946	protein_coding	76429	382.621	0.313316	0.128728	2.43395	0.0149352	0.0379434
NA	NA	NA	NA	265.1	0.312664	0.11189	2.7944	0.00519962	0.0153385
Nsmce2	ENSMUSG00000059586	protein_coding	68501	1939.76	0.312121	0.0727438	4.29069	1.78e-05	0.00010512
Zfp526	ENSMUSG00000046541	protein_coding	NA	626.388	0.311097	0.112178	2.77325	0.00555	0.0162479
Pfkm	ENSMUSG00000033065	protein_coding	18642	2203	0.310467	0.0725289	4.28059	1.86e-05	0.00010946
Nlk	ENSMUSG00000017376	protein_coding	18099	1042.39	0.309936	0.08464	3.66181	0.00025044	0.0011001
Ddb2	ENSMUSG00000002109	protein_coding	107986	898.528	0.309582	0.0617529	5.01324	5.35e-07	4.45e-06
Neurl2	ENSMUSG00000039873	protein_coding	NA	370.029	0.309255	0.0980624	3.15365	0.0016124	0.00560666
Ifi211	ENSMUSG00000026536	protein_coding	381308	4242.12	0.308594	0.0737958	4.18173	2.89e-05	0.00016194
Xrcc5	ENSMUSG00000026187	protein_coding	22596	784.311	0.308212	0.0726542	4.24217	2.21e-05	0.00012729
Ell2	ENSMUSG00000001542	protein_coding	192657	1277.81	0.30663	0.118924	2.57836	0.00992707	0.0267603
A630001G21Rik	ENSMUSG00000052760	protein_coding	319997	553.094	0.305622	0.0885867	3.44997	0.00056065	0.00222178
E230014E18Rik	ENSMUSG00000111514	lincRNA	NA	417.528	0.305337	0.117592	2.59657	0.0094159	0.0255915
Mmab	ENSMUSG00000029575	protein_coding	NA	392.504	0.303778	0.109183	2.78228	0.00539787	0.0158614
Ints6	ENSMUSG00000035161	protein_coding	18130	1589.26	0.30369	0.0908998	3.34093	0.00083498	0.00315983
Rbbp6	ENSMUSG00000030779	protein_coding	19647	6340.69	0.303553	0.0803024	3.78013	0.00015675	0.00072507
Retsat	ENSMUSG00000056666	protein_coding	NA	1123.03	0.3033	0.0847826	3.57739	0.00034705	0.00145946
Mif4gd	ENSMUSG00000020743	protein_coding	NA	842.604	0.303278	0.0728085	4.16541	3.11e-05	0.00017274
Sbsn	ENSMUSG00000046056	protein_coding	282619	1279.54	0.303183	0.077849	3.8945	9.84e-05	0.0004795
Gfm2	ENSMUSG00000021666	protein_coding	320806	1763.22	0.302761	0.0633041	4.78264	1.73e-06	1.29e-05
Hapln4	ENSMUSG00000007594	protein_coding	NA	557.462	0.302727	0.104861	2.88692	0.00389029	0.0119867
Ust	ENSMUSG00000047712	protein_coding	338362	781.443	0.301791	0.104968	2.87508	0.0040392	0.0123817
Tbck	ENSMUSG00000028030	protein_coding	271981	678.296	0.300771	0.0685114	4.39009	1.13e-05	7.02e-05
Cyren	ENSMUSG00000046806	protein_coding	NA	1890.09	0.300671	0.0658451	4.56634	4.96e-06	3.33e-05
Rab8b	ENSMUSG00000036943	protein_coding	235442	1453.24	0.300649	0.0795087	3.78134	0.00015599	0.00072228
Copg2	ENSMUSG00000025607	protein_coding	54160	1541.26	0.298883	0.0690284	4.32985	1.49e-05	8.97e-05
Glipr2	ENSMUSG00000028480	protein_coding	384009	2266.06	0.297624	0.0962029	3.09371	0.00197667	0.00667675
Asph	ENSMUSG00000028207	protein_coding	65973	3114.68	0.297469	0.0821867	3.61943	0.00029525	0.00126931
C130026I21Rik	ENSMUSG00000052477	protein_coding	620078	1578.43	0.294916	0.0717934	4.10784	3.99e-05	0.00021622
Itga7	ENSMUSG00000025348	protein_coding	16404	1077.73	0.294836	0.0983566	2.99762	0.00272098	0.00879617
Recql5	ENSMUSG00000020752	protein_coding	170472	980.786	0.29455	0.0600759	4.90296	9.44e-07	7.48e-06
Rbm34	ENSMUSG00000033931	protein_coding	52202	911.487	0.293239	0.0641432	4.57163	4.84e-06	3.26e-05
Vgll4	ENSMUSG00000030315	protein_coding	232334	1508.98	0.292726	0.070308	4.16348	3.13e-05	0.00017379
Adcy7	ENSMUSG00000031659	protein_coding	11513	283.152	0.292232	0.110553	2.64337	0.00820847	0.0227982
Ahcyl1	ENSMUSG00000027893	protein_coding	229709	6274.13	0.292007	0.0704934	4.14233	3.44e-05	0.00018897
Armcx3	ENSMUSG00000049047	protein_coding	NA	816.443	0.291957	0.102989	2.83485	0.00458476	0.0137605
Pgam2	ENSMUSG00000020475	protein_coding	NA	271.623	0.291317	0.105085	2.77221	0.00556763	0.0162916
Btbd2	ENSMUSG00000003344	protein_coding	NA	1128.84	0.290329	0.118921	2.44136	0.0146321	0.0373407
Gopc	ENSMUSG00000019861	protein_coding	94221	1168.82	0.290198	0.0949212	3.05726	0.00223373	0.0074151
NA	NA	NA	NA	653.378	0.289223	0.0926198	3.12269	0.00179206	0.00613754
Oip5os1	ENSMUSG00000085438	lincRNA	NA	1347.86	0.288383	0.0859385	3.35569	0.00079168	0.00302118
Cactin	ENSMUSG00000034889	protein_coding	NA	2133.56	0.288102	0.0970541	2.96847	0.00299285	0.00957607
Alg11	ENSMUSG00000063362	protein_coding	207958	981.69	0.287074	0.0705072	4.07156	4.67e-05	0.00024845
Ppp4r1l-ps	ENSMUSG00000055897	transcribed_unprocessed_pseudogene	NA	1794.93	0.286126	0.0783119	3.65367	0.00025852	0.00113231
Ppp6r3	ENSMUSG00000024908	protein_coding	52036	4845.24	0.286121	0.0579376	4.93844	7.87e-07	6.33e-06
Zbtb39	ENSMUSG00000044617	protein_coding	NA	2316.11	0.284538	0.111866	2.54356	0.0109729	0.0291432
Ppwd1	ENSMUSG00000021713	protein_coding	238831	461.08	0.284368	0.0948609	2.99774	0.00271993	0.00879434
Zfp825	ENSMUSG00000069208	protein_coding	235956	217.429	0.282945	0.113747	2.48748	0.012865	0.0335147
Gm5165	ENSMUSG00000116802	lincRNA	102640673	479.515	0.282086	0.087479	3.22462	0.00126142	0.00452529
Slc25a40	ENSMUSG00000054099	protein_coding	319653	481.468	0.282077	0.108837	2.59174	0.00954926	0.0259035
Rnft1	ENSMUSG00000020521	protein_coding	NA	1132.4	0.281632	0.0874219	3.22153	0.00127507	0.00456618
Limk1	ENSMUSG00000029674	protein_coding	16885	1061.64	0.281243	0.0774452	3.6315	0.00028177	0.00122003
Gtf3c4	ENSMUSG00000035666	protein_coding	269252	1402.08	0.28062	0.0848076	3.3089	0.00093662	0.0034985
Fubp1	ENSMUSG00000028034	protein_coding	51886	2972.22	0.278156	0.0882141	3.1532	0.00161494	0.00561375
Slc35f5	ENSMUSG00000026342	protein_coding	74150	1049.11	0.278135	0.0868115	3.2039	0.00135579	0.00481345
Vegfa	ENSMUSG00000023951	protein_coding	22339	26788	0.27739	0.0651227	4.25949	2.05e-05	0.00011887
Pars2	ENSMUSG00000043572	protein_coding	NA	285.225	0.276776	0.101847	2.71756	0.00657643	0.0188542
Jun	ENSMUSG00000052684	protein_coding	16476	7633.87	0.276642	0.101773	2.71822	0.00656351	0.0188231
Ticam1	ENSMUSG00000047123	protein_coding	106759	1059.1	0.27659	0.0891879	3.1012	0.00192735	0.00652961
Dsn1	ENSMUSG00000027635	protein_coding	NA	585.862	0.276515	0.116329	2.377	0.0174541	0.0433118
Gclm	ENSMUSG00000028124	protein_coding	14630	5893.64	0.275204	0.0683218	4.02806	5.62e-05	0.00029276
Slc7a11	ENSMUSG00000027737	protein_coding	26570	5954.42	0.275192	0.118141	2.32936	0.0198398	0.0482098
Phlpp2	ENSMUSG00000031732	protein_coding	244650	774.311	0.274892	0.107274	2.56253	0.0103912	0.0278337
Acbd4	ENSMUSG00000056938	protein_coding	NA	950.16	0.274733	0.0944851	2.90768	0.00364116	0.0113405
Kifc2	ENSMUSG00000004187	protein_coding	16581	562.222	0.273132	0.0770872	3.54315	0.00039537	0.00163578
Armcx1	ENSMUSG00000033460	protein_coding	NA	432.64	0.271835	0.0985057	2.75958	0.00578751	0.016867
Manba	ENSMUSG00000028164	protein_coding	110173	861.492	0.269619	0.0695193	3.87833	0.00010518	0.00050897
Msantd4	ENSMUSG00000041124	protein_coding	78100	1388.4	0.269467	0.0658917	4.08954	4.32e-05	0.00023241
Lgr4	ENSMUSG00000050199	protein_coding	107515	552.124	0.269432	0.108195	2.49024	0.0127656	0.0332874
Mrpl45	ENSMUSG00000018882	protein_coding	67036	2364.98	0.268799	0.0693171	3.87782	0.0001054	0.00050976
Decr2	ENSMUSG00000036775	protein_coding	26378	816.418	0.268636	0.0699582	3.83995	0.00012306	0.00058473
Ufl1	ENSMUSG00000040359	protein_coding	67490	2236.53	0.268256	0.0708153	3.78811	0.0001518	0.00070558
1700028K03Rik	ENSMUSG00000089798	protein_coding	76421	509.145	0.267794	0.0922901	2.90165	0.00371202	0.0115235
Zbtb43	ENSMUSG00000026788	protein_coding	71834	1232.6	0.267788	0.0791862	3.38175	0.00072026	0.0027808
Septin10	ENSMUSG00000019917	protein_coding	103080	1050.11	0.266047	0.0912807	2.9146	0.00356148	0.0111247
Casp8	ENSMUSG00000026029	protein_coding	12370	911.529	0.265835	0.0651052	4.08316	4.44e-05	0.00023748
D230025D16Rik	ENSMUSG00000031889	protein_coding	234678	1279.64	0.265446	0.0558774	4.75051	2.03e-06	1.49e-05
Vcp	ENSMUSG00000028452	protein_coding	269523	17326.8	0.265361	0.0418158	6.34595	2.21e-10	3.53e-09
Smcr8	ENSMUSG00000049323	protein_coding	NA	4338.16	0.265258	0.0947955	2.79821	0.00513866	0.0151833
Fem1c	ENSMUSG00000033319	protein_coding	240263	1325.69	0.265101	0.0811228	3.2679	0.0010835	0.00396309
Gm15491	ENSMUSG00000087367	antisense	NA	2198.37	0.26497	0.0586719	4.51613	6.3e-06	4.14e-05
Emx2os	ENSMUSG00000087095	antisense	NA	552.08	0.263698	0.0868731	3.03543	0.00240189	0.00789547
Ebag9	ENSMUSG00000022339	protein_coding	55960	859.131	0.263425	0.0839784	3.13682	0.00170792	0.00588397
Rmnd1	ENSMUSG00000019763	protein_coding	66084	1062.93	0.262644	0.0642782	4.08606	4.39e-05	0.00023494
Unc93b1	ENSMUSG00000036908	protein_coding	54445	723.891	0.259764	0.0885941	2.93207	0.00336714	0.0106017
Mtg1	ENSMUSG00000039018	protein_coding	NA	355.701	0.258033	0.103547	2.49193	0.0127051	0.0331552
Slc1a4	ENSMUSG00000020142	protein_coding	55963	3715.76	0.257051	0.0733802	3.50301	0.00046004	0.00186711
Asb7	ENSMUSG00000030509	protein_coding	117589	918.798	0.255932	0.0954002	2.68272	0.00730262	0.0206458
Zfp977	ENSMUSG00000092335	protein_coding	637776	265.875	0.255534	0.105444	2.4234	0.0153758	0.0388832
Cldnd1	ENSMUSG00000022744	protein_coding	NA	4416.25	0.255528	0.0495369	5.15834	2.49e-07	2.23e-06
Trib2	ENSMUSG00000020601	protein_coding	217410	1736.42	0.254332	0.0682524	3.72634	0.00019428	0.0008772
Taok1	ENSMUSG00000017291	protein_coding	216965	3149.76	0.253282	0.103207	2.45412	0.0141231	0.0362406
Zfp931	ENSMUSG00000078861	protein_coding	NA	820.711	0.252427	0.078572	3.21269	0.00131499	0.00468144
Dppa4	ENSMUSG00000058550	protein_coding	73693	273.572	0.252237	0.103345	2.44072	0.0146578	0.0373907
Nbr1	ENSMUSG00000017119	protein_coding	17966	10990	0.252216	0.064841	3.88975	0.00010035	0.00048767
Khnyn	ENSMUSG00000047153	protein_coding	219094	2010.26	0.251226	0.0550068	4.56717	4.94e-06	3.32e-05
Ank3	ENSMUSG00000069601	protein_coding	11735	765.354	0.250215	0.0925833	2.7026	0.00688002	0.0195976
Pced1a	ENSMUSG00000037773	protein_coding	NA	851.898	0.249972	0.0802662	3.11429	0.00184387	0.00629143
Cyp4f13	ENSMUSG00000024055	protein_coding	170716	437.807	0.249604	0.0866534	2.88049	0.00397061	0.0122072
Ambra1	ENSMUSG00000040506	protein_coding	228361	2447.59	0.24956	0.0524385	4.75909	1.94e-06	1.44e-05
Srrm4	ENSMUSG00000063919	protein_coding	68955	762.825	0.249255	0.096444	2.58445	0.00975339	0.0263626
Usp11	ENSMUSG00000031066	protein_coding	NA	1443.13	0.24888	0.0766699	3.24612	0.00116989	0.00424296
Diaph2	ENSMUSG00000034480	protein_coding	NA	1330.36	0.248445	0.105997	2.34389	0.0190839	0.0466416
Helb	ENSMUSG00000020228	protein_coding	117599	1126.86	0.248165	0.0717941	3.45662	0.000547	0.0021734
NA	NA	NA	NA	1339.18	0.24701	0.0974695	2.53423	0.0112695	0.0298382
Vbp1	ENSMUSG00000031197	protein_coding	NA	1925.15	0.246491	0.0584523	4.21697	2.48e-05	0.00014073
Spice1	ENSMUSG00000043065	protein_coding	212514	640.039	0.246163	0.0883269	2.78696	0.00532056	0.015657
Cdca7l	ENSMUSG00000021175	protein_coding	217946	562.434	0.245628	0.10178	2.41332	0.0158079	0.0398371
Maoa	ENSMUSG00000025037	protein_coding	NA	6521.43	0.244328	0.0607578	4.02135	5.79e-05	0.00029952
BC005537	ENSMUSG00000019132	protein_coding	79555	9420.41	0.244296	0.0531267	4.59836	4.26e-06	2.91e-05
Zfp626	ENSMUSG00000030604	protein_coding	71163	770.708	0.243613	0.086425	2.81878	0.00482061	0.0143652
Jade3	ENSMUSG00000037315	protein_coding	NA	1029.4	0.243237	0.0867158	2.80499	0.00503182	0.0149114
Ssr3	ENSMUSG00000027828	protein_coding	67437	25558.1	0.242738	0.0648916	3.74067	0.00018353	0.00083263
Rhoq	ENSMUSG00000024143	protein_coding	104215	4415.58	0.241435	0.0648505	3.72295	0.00019691	0.00088798
Nagk	ENSMUSG00000034744	protein_coding	56174	1100.89	0.241145	0.0833749	2.8923	0.00382439	0.0118298
Morc2a	ENSMUSG00000034543	protein_coding	74522	5496.39	0.239719	0.0643559	3.72489	0.0001954	0.0008816
Mnat1	ENSMUSG00000021103	protein_coding	17420	877.482	0.239718	0.0727847	3.29353	0.00098939	0.0036684
C1qtnf6	ENSMUSG00000022440	protein_coding	72709	635.115	0.238989	0.0823108	2.90349	0.00369025	0.0114716
Mettl6	ENSMUSG00000021891	protein_coding	67011	1460.95	0.238899	0.0667733	3.57777	0.00034654	0.00145835
Surf1	ENSMUSG00000015790	protein_coding	20930	874.04	0.238217	0.0652494	3.65088	0.00026135	0.00114278
Gm14322	ENSMUSG00000078864	protein_coding	NA	1328.51	0.238179	0.0828463	2.87495	0.00404092	0.0123835
NA	NA	NA	NA	1225.19	0.236773	0.0759231	3.11859	0.00181719	0.00621559
Pigm	ENSMUSG00000050229	protein_coding	67556	1166.73	0.236268	0.0819893	2.88169	0.00395549	0.0121649
BC002059	ENSMUSG00000060149	lincRNA	NA	549.361	0.236016	0.0863846	2.73216	0.00629212	0.0181337
Aar2	ENSMUSG00000027628	protein_coding	68295	1206.87	0.235894	0.0616275	3.82773	0.00012933	0.00061037
Tuba4a	ENSMUSG00000026202	protein_coding	22145	1814.67	0.235421	0.0876887	2.68473	0.00725876	0.0205442
Borcs8	ENSMUSG00000002345	protein_coding	72368	563.81	0.234318	0.0920834	2.54463	0.0109394	0.0290661
Atg4c	ENSMUSG00000028550	protein_coding	242557	689.332	0.234092	0.0847651	2.76166	0.00575088	0.0167656
Usp40	ENSMUSG00000005501	protein_coding	227334	1115.8	0.23388	0.075704	3.0894	0.00200558	0.00676181
Rbm5	ENSMUSG00000032580	protein_coding	83486	3592.07	0.233791	0.0614289	3.80588	0.0001413	0.00066102
Abcd3	ENSMUSG00000028127	protein_coding	19299	1708.45	0.233532	0.061338	3.80729	0.0001405	0.00065812
Hibch	ENSMUSG00000041426	protein_coding	227095	555.463	0.233504	0.0800419	2.91728	0.00353101	0.0110486
Hexb	ENSMUSG00000021665	protein_coding	15212	2189.34	0.232281	0.0586811	3.95837	7.55e-05	0.00037809
Atg14	ENSMUSG00000037526	protein_coding	100504663	2360.09	0.230011	0.091679	2.50887	0.0121118	0.0318083
Zfp157	ENSMUSG00000036898	protein_coding	72154	657.627	0.228119	0.0827978	2.75514	0.00586673	0.0170623
Zfp830	ENSMUSG00000046010	protein_coding	NA	459.303	0.227704	0.0963319	2.36374	0.0180916	0.0446008
Mief2	ENSMUSG00000018599	protein_coding	NA	525.712	0.227637	0.0891297	2.55399	0.0106496	0.0284292
Lrrc58	ENSMUSG00000034158	protein_coding	320184	3885.7	0.227508	0.0831583	2.73584	0.00622217	0.0179607
Wdr81	ENSMUSG00000045374	protein_coding	192652	3262.68	0.22721	0.0692119	3.28282	0.00102776	0.00379207
Guca1b	ENSMUSG00000023979	protein_coding	107477	2011.91	0.225915	0.0585495	3.85853	0.00011407	0.00054675
Fam219a	ENSMUSG00000028439	protein_coding	71901	1341.82	0.22509	0.0645521	3.48695	0.00048857	0.00197145
Tlcd2	ENSMUSG00000038217	protein_coding	NA	1064.53	0.223565	0.0812326	2.75216	0.00592031	0.0171988
Rps6ka2	ENSMUSG00000023809	protein_coding	20112	1196.17	0.221349	0.0868723	2.54798	0.0108349	0.0288264
Lrrc14	ENSMUSG00000033728	protein_coding	NA	2834.73	0.221201	0.0502514	4.4019	1.07e-05	6.68e-05
Xxylt1	ENSMUSG00000047434	protein_coding	268880	983.265	0.220243	0.087598	2.51425	0.0119287	0.0313865
Glmn	ENSMUSG00000029276	protein_coding	170823	441.735	0.21992	0.0910204	2.41616	0.0156852	0.0395664
Eif2a	ENSMUSG00000027810	protein_coding	229317	2799.86	0.218395	0.0561925	3.88655	0.00010168	0.00049401
Prdm2	ENSMUSG00000057637	protein_coding	110593	2969.81	0.218076	0.0803228	2.71499	0.00662778	0.0189805
Zcchc24	ENSMUSG00000055538	protein_coding	71918	6429.09	0.217185	0.0755986	2.87287	0.00406763	0.0124506
Nipal3	ENSMUSG00000028803	protein_coding	74552	591.058	0.216353	0.0882337	2.45205	0.0142047	0.0364293
Wasf1	ENSMUSG00000019831	protein_coding	83767	510.401	0.216189	0.0926678	2.33295	0.0196509	0.0478083
Fam234b	ENSMUSG00000030207	protein_coding	74525	816.12	0.214941	0.0846879	2.53803	0.0111478	0.0295592
Rbm3	ENSMUSG00000031167	protein_coding	NA	6570.73	0.214272	0.0486288	4.40627	1.05e-05	6.56e-05
Cd99l2	ENSMUSG00000035776	protein_coding	NA	1555.17	0.214003	0.083849	2.55224	0.0107032	0.0285429
1700022I11Rik	ENSMUSG00000028451	protein_coding	67317	4332.8	0.213891	0.0538048	3.97531	7.03e-05	0.0003553
Rab9	ENSMUSG00000079316	protein_coding	NA	1488	0.213528	0.0772282	2.7649	0.00569399	0.0166292
Slc45a4	ENSMUSG00000079020	protein_coding	106068	2287.65	0.212146	0.0478383	4.43465	9.22e-06	5.82e-05
Mlst8	ENSMUSG00000024142	protein_coding	NA	758.03	0.212105	0.0697926	3.03907	0.00237307	0.00781488
Jmjd4	ENSMUSG00000036819	protein_coding	NA	649.045	0.209849	0.0772729	2.71569	0.00661372	0.0189492
Csnk1g1	ENSMUSG00000032384	protein_coding	214897	917.485	0.20914	0.0846905	2.46946	0.0135316	0.0349701
Mpp5	ENSMUSG00000021112	protein_coding	56217	1221.82	0.207187	0.0836057	2.47814	0.0132068	0.0342674
Rab10os	ENSMUSG00000079179	antisense	NA	1231.67	0.2031	0.0836493	2.42799	0.0151827	0.0384753
Spcs3	ENSMUSG00000054408	protein_coding	76687	2468.14	0.20207	0.0739579	2.73223	0.00629074	0.0181326
Syf2	ENSMUSG00000028821	protein_coding	68592	10165.4	0.201617	0.0472377	4.26814	1.97e-05	0.00011491
1110002L01Rik	ENSMUSG00000071456	antisense	NA	1571.02	0.200933	0.0566632	3.54609	0.00039099	0.0016191
Wsb1	ENSMUSG00000017677	protein_coding	78889	4704.5	0.200772	0.0780679	2.57176	0.0101183	0.027191
Dhx40	ENSMUSG00000018425	protein_coding	67487	4284.87	0.200684	0.0586528	3.42156	0.00062264	0.00244025
Rabep2	ENSMUSG00000030727	protein_coding	70314	636.089	0.200039	0.0793393	2.52131	0.0116917	0.0308391
Rtn4	ENSMUSG00000020458	protein_coding	68585	17604.7	0.199887	0.0346981	5.76075	8.37e-09	1.02e-07
D11Wsu47e	ENSMUSG00000041623	protein_coding	276852	788.915	0.199477	0.0760457	2.62312	0.00871285	0.0239934
Agps	ENSMUSG00000042410	protein_coding	228061	1656.2	0.199375	0.0845167	2.359	0.0183245	0.0450831
Rad50	ENSMUSG00000020380	protein_coding	19360	1352.22	0.198928	0.0766561	2.59507	0.00945724	0.0256772
Tubb4b	ENSMUSG00000036752	protein_coding	227613	4107.88	0.198542	0.0838296	2.3684	0.0178651	0.0441083
Anapc2	ENSMUSG00000026965	protein_coding	99152	3482.35	0.198494	0.069601	2.85188	0.00434611	0.0131602
Extl2	ENSMUSG00000027963	protein_coding	58193	800.294	0.197415	0.0742377	2.65922	0.00783212	0.0219275
Ets2	ENSMUSG00000022895	protein_coding	23872	3738.12	0.195764	0.0842561	2.32344	0.0201557	0.0488659
Ginm1	ENSMUSG00000040006	protein_coding	215751	1124.91	0.195175	0.0640463	3.04741	0.00230821	0.00763177
Cops2	ENSMUSG00000027206	protein_coding	12848	3935.53	0.193972	0.0656293	2.95557	0.00312092	0.00994551
Adnp	ENSMUSG00000051149	protein_coding	11538	9036.5	0.193581	0.0695383	2.7838	0.00537261	0.0158
Lrrk1	ENSMUSG00000015133	protein_coding	233328	3762.86	0.192958	0.0816707	2.36264	0.0181454	0.044697
Fbxo38	ENSMUSG00000042211	protein_coding	107035	2384.79	0.192743	0.0596455	3.23147	0.00123155	0.00443663
Fundc1	ENSMUSG00000025040	protein_coding	NA	759.488	0.192409	0.0784921	2.45131	0.0142336	0.036483
Fam114a2	ENSMUSG00000020523	protein_coding	67726	2340.58	0.192207	0.0610342	3.14917	0.00163733	0.00567745
Dynlt3	ENSMUSG00000031176	protein_coding	NA	2638.82	0.191912	0.0588962	3.25848	0.00112011	0.00408584
Slc31a1	ENSMUSG00000066150	protein_coding	20529	3096.58	0.187427	0.0507821	3.6908	0.00022355	0.00099329
AU020206	ENSMUSG00000097415	lincRNA	NA	1466.82	0.187238	0.0538754	3.47538	0.00051012	0.00204884
Gng12	ENSMUSG00000036402	protein_coding	14701	3106.46	0.186453	0.0593451	3.14184	0.00167892	0.00579618
Spg20	ENSMUSG00000036580	protein_coding	229285	3338.55	0.186406	0.0473303	3.93841	8.2e-05	0.00040725
Trappc11	ENSMUSG00000038102	protein_coding	320714	1387.41	0.185784	0.0741823	2.50443	0.012265	0.0321643
Tmem181c-ps	ENSMUSG00000093880	unprocessed_pseudogene	NA	1083.17	0.185769	0.0743246	2.49943	0.0124393	0.0325601
Atxn7l3b	ENSMUSG00000074748	protein_coding	NA	5644.18	0.18453	0.0547766	3.36878	0.00075501	0.00289709
Foxn3	ENSMUSG00000033713	protein_coding	71375	2480.58	0.184476	0.0677708	2.72206	0.0064877	0.0186263
Rpl7l1	ENSMUSG00000063888	protein_coding	NA	3912.88	0.18168	0.0589914	3.07978	0.00207154	0.00695445
Atl2	ENSMUSG00000059811	protein_coding	56298	1668.79	0.177872	0.0698784	2.54545	0.0109136	0.0290101
Ei24	ENSMUSG00000062762	protein_coding	13663	1592.59	0.176838	0.0576173	3.06918	0.00214649	0.00716498
Flywch1	ENSMUSG00000040097	protein_coding	NA	2184.25	0.175431	0.0602338	2.9125	0.00358551	0.0111882
Trub1	ENSMUSG00000025086	protein_coding	72133	1615.91	0.174646	0.069728	2.50467	0.0122564	0.032151
Sephs1	ENSMUSG00000026662	protein_coding	109079	1017.86	0.173875	0.0701718	2.47785	0.0132176	0.0342855
Ptpdc1	ENSMUSG00000038042	protein_coding	218232	934.681	0.173528	0.0647079	2.68171	0.0073247	0.0206986
Vps11	ENSMUSG00000032127	protein_coding	71732	4278.95	0.170885	0.0460627	3.70982	0.0002074	0.0009286
Cfp	ENSMUSG00000001128	protein_coding	NA	2646.05	0.170689	0.0524503	3.25431	0.00113669	0.00413674
Ube2k	ENSMUSG00000029203	protein_coding	53323	2428.04	0.169392	0.0529977	3.19621	0.00139245	0.00493204
Ddx52	ENSMUSG00000020677	protein_coding	78394	2271.55	0.169381	0.0532854	3.17875	0.00147911	0.00519536
Zfp319	ENSMUSG00000046556	protein_coding	NA	1162.71	0.169154	0.0715032	2.36568	0.017997	0.0443918
Mapk8ip1	ENSMUSG00000027223	protein_coding	19099	2039.61	0.168588	0.0563481	2.99191	0.00277242	0.00894811
Irak2	ENSMUSG00000060477	protein_coding	108960	2079.25	0.168099	0.0611542	2.74877	0.00598191	0.0173492
Hnrnpa1	ENSMUSG00000046434	protein_coding	15382	27063.3	0.1672	0.0509772	3.27991	0.00103841	0.00382514
Flnc	ENSMUSG00000068699	protein_coding	68794	3511.57	0.164893	0.0666901	2.47253	0.013416	0.034696
C2cd2	ENSMUSG00000045975	protein_coding	207781	2128.11	0.164787	0.0656237	2.51108	0.0120361	0.0316325
2900097C17Rik	ENSMUSG00000102869	lincRNA	NA	9237.03	0.163997	0.0477511	3.43441	0.00059385	0.00234108
Polr3k	ENSMUSG00000038628	protein_coding	NA	1296.95	0.163848	0.0586415	2.79407	0.00520493	0.0153466
Tnfrsf10b	ENSMUSG00000022074	protein_coding	21933	1642.68	0.163788	0.063019	2.59902	0.00934891	0.0254399
Asb1	ENSMUSG00000026311	protein_coding	65247	970.603	0.162668	0.0636261	2.55662	0.0105695	0.0282486
Ccdc163	ENSMUSG00000028689	protein_coding	68394	1119.55	0.159981	0.0598702	2.67213	0.00753705	0.0212065
Faf2	ENSMUSG00000025873	protein_coding	76577	2894.39	0.158693	0.0527297	3.00955	0.00261634	0.00849627
Capza2	ENSMUSG00000015733	protein_coding	12343	7179.61	0.158326	0.059423	2.66438	0.00771294	0.0216306
Yipf4	ENSMUSG00000024072	protein_coding	67864	2033.1	0.158015	0.0638593	2.47442	0.0133454	0.034545
Scyl1	ENSMUSG00000024941	protein_coding	78891	36307.3	0.151351	0.0489125	3.09432	0.00197268	0.00666697
Odf2	ENSMUSG00000026790	protein_coding	18286	2405.41	0.147454	0.0630084	2.34023	0.0192718	0.0470184
Mrps2	ENSMUSG00000035772	protein_coding	NA	1683.31	0.14657	0.0610763	2.39979	0.0164044	0.0410638
Dcaf8	ENSMUSG00000026554	protein_coding	98193	2760.77	0.145575	0.0502515	2.89692	0.00376845	0.0116787
Cwc22	ENSMUSG00000027014	protein_coding	80744	1082.45	0.143758	0.0600676	2.39326	0.0166992	0.0417066
Wdr82	ENSMUSG00000020257	protein_coding	77305	2325.47	0.143	0.0572508	2.49777	0.0124977	0.032694
Ewsr1	ENSMUSG00000009079	protein_coding	14030	12125.1	0.142973	0.0384343	3.71993	0.00019928	0.0008971
Golm1	ENSMUSG00000021556	protein_coding	105348	1351.06	0.142508	0.058466	2.43745	0.0147914	0.0376521
Pou6f1	ENSMUSG00000009739	protein_coding	19009	1598.94	0.13916	0.0562578	2.47361	0.0133757	0.0346115
Adcy3	ENSMUSG00000020654	protein_coding	104111	1659.39	0.138667	0.0571311	2.42718	0.0152167	0.0385453
Rtn3	ENSMUSG00000024758	protein_coding	20168	8220.62	0.138232	0.0454945	3.03844	0.00237806	0.00782848
Sin3a	ENSMUSG00000042557	protein_coding	20466	2311.13	0.136532	0.0532879	2.56215	0.0104025	0.0278558
Adar	ENSMUSG00000027951	protein_coding	56417	3025.53	0.134883	0.0548718	2.45815	0.0139656	0.0359026
Srsf2	ENSMUSG00000034120	protein_coding	20382	10265.9	0.132539	0.0489358	2.70843	0.00676032	0.0193112
Ahcy	ENSMUSG00000027597	protein_coding	269378	2920.55	0.130841	0.0564205	2.31902	0.0203937	0.0493114
Pip4k2b	ENSMUSG00000018547	protein_coding	108083	2734.49	0.127242	0.0543225	2.34233	0.0191636	0.0467984
Bnip2	ENSMUSG00000011958	protein_coding	12175	3147.5	0.125981	0.04554	2.76639	0.00566812	0.0165643
Tmed2	ENSMUSG00000029390	protein_coding	56334	5747.57	0.111257	0.044861	2.48005	0.0131365	0.0341148
Cdv3	ENSMUSG00000032803	protein_coding	321022	6329.89	-0.103544	0.0364015	-2.8445	0.00444818	0.0134297
Eif4b	ENSMUSG00000058655	protein_coding	75705	54075	-0.105248	0.0389711	-2.70068	0.00691987	0.0196988
Cdc42se1	ENSMUSG00000046722	protein_coding	NA	4122.53	-0.112521	0.0484532	-2.32227	0.0202184	0.0489673
Rab12	ENSMUSG00000023460	protein_coding	19328	2657	-0.115515	0.0431824	-2.67505	0.0074719	0.0210457
Ube2d3	ENSMUSG00000078578	protein_coding	66105	9842.02	-0.117506	0.0482115	-2.4373	0.0147975	0.037657
Mcoln1	ENSMUSG00000004567	protein_coding	NA	3527.12	-0.120451	0.0518281	-2.32404	0.0201231	0.0487935
Rbm22	ENSMUSG00000024604	protein_coding	66810	2231.54	-0.120528	0.0453143	-2.65983	0.00781804	0.0218949
Senp6	ENSMUSG00000034252	protein_coding	215351	3487.68	-0.122403	0.0528311	-2.31687	0.0205111	0.0495487
Sptssa	ENSMUSG00000044408	protein_coding	104725	2380.56	-0.124719	0.0421564	-2.95849	0.00309149	0.00986383
Psmd1	ENSMUSG00000026229	protein_coding	70247	5624.13	-0.124826	0.0408112	-3.05862	0.00222358	0.00738696
Opa3	ENSMUSG00000052214	protein_coding	403187	1776.95	-0.125994	0.0487416	-2.58493	0.0097399	0.0263419
Wipi1	ENSMUSG00000041895	protein_coding	52639	3381.29	-0.126516	0.052701	-2.40064	0.0163664	0.0410051
Cct2	ENSMUSG00000034024	protein_coding	12461	29429.8	-0.126789	0.0541912	-2.33967	0.0193008	0.0470766
Gns	ENSMUSG00000034707	protein_coding	75612	13846.5	-0.128538	0.0431447	-2.97923	0.00288976	0.00928388
Gatad1	ENSMUSG00000007415	protein_coding	67210	2539.5	-0.128545	0.0484408	-2.65366	0.00796236	0.0222469
Nono	ENSMUSG00000031311	protein_coding	NA	10746.4	-0.132655	0.0417238	-3.17936	0.00147603	0.00518854
Axin1	ENSMUSG00000024182	protein_coding	12005	3844.79	-0.133233	0.0423439	-3.14644	0.0016527	0.00571982
Psmd5	ENSMUSG00000026869	protein_coding	66998	1972.74	-0.133982	0.0509077	-2.63186	0.00849183	0.0234667
Dlst	ENSMUSG00000004789	protein_coding	78920	3740.57	-0.134248	0.0413571	-3.24608	0.00117008	0.00424296
Tob2	ENSMUSG00000048546	protein_coding	57259	4332.64	-0.135091	0.0439698	-3.07235	0.0021238	0.00710624
Ppp2ca	ENSMUSG00000020349	protein_coding	19052	8390.9	-0.135233	0.0423023	-3.19682	0.0013895	0.00492253
Ehmt1	ENSMUSG00000036893	protein_coding	77683	2124.36	-0.135857	0.0444611	-3.05563	0.00224586	0.00745141
Ppp2r2d	ENSMUSG00000041769	protein_coding	52432	1749.58	-0.136693	0.0547195	-2.49807	0.012487	0.0326756
Dlat	ENSMUSG00000000168	protein_coding	235339	1743.46	-0.136885	0.0554453	-2.46883	0.0135555	0.0350218
Thap2	ENSMUSG00000020137	protein_coding	66816	3150.52	-0.137648	0.0557602	-2.46857	0.0135653	0.0350324
Srsf6	ENSMUSG00000016921	protein_coding	67996	11083.2	-0.140651	0.0449859	-3.12655	0.00176869	0.00606913
Fbxl19	ENSMUSG00000030811	protein_coding	233902	8188.48	-0.141907	0.0370902	-3.82601	0.00013024	0.00061418
Rangap1	ENSMUSG00000022391	protein_coding	19387	4401.88	-0.141945	0.0611175	-2.32249	0.0202066	0.0489501
Grsf1	ENSMUSG00000044221	protein_coding	231413	2958.88	-0.1425	0.0439435	-3.24281	0.00118358	0.00428936
Arhgef5	ENSMUSG00000033542	protein_coding	54324	3666.04	-0.142643	0.0601723	-2.37058	0.01776	0.0439028
Cipc	ENSMUSG00000034157	protein_coding	217732	1660.2	-0.14265	0.0612637	-2.32845	0.0198882	0.0483015
Uba1	ENSMUSG00000001924	protein_coding	NA	11925.4	-0.14277	0.036807	-3.87888	0.00010494	0.00050808
Pdxdc1	ENSMUSG00000022680	protein_coding	94184	3382.17	-0.144127	0.0528091	-2.72922	0.00634849	0.0182729
Gtf2i	ENSMUSG00000060261	protein_coding	14886	4728.26	-0.144857	0.0584985	-2.47625	0.0132769	0.0344099
Atg3	ENSMUSG00000022663	protein_coding	67841	1621.86	-0.144876	0.0596225	-2.42989	0.0151032	0.0383113
Mccc1	ENSMUSG00000027709	protein_coding	72039	1168.89	-0.145697	0.0552292	-2.63804	0.00833879	0.0231248
Brd2	ENSMUSG00000024335	protein_coding	14312	10458.7	-0.147571	0.0456411	-3.23328	0.00122375	0.00441642
Tle3	ENSMUSG00000032280	protein_coding	21887	2584.07	-0.147796	0.0580708	-2.54509	0.0109249	0.0290317
Eif4e	ENSMUSG00000028156	protein_coding	13684	4218.83	-0.147869	0.0500665	-2.95345	0.00314244	0.0100071
Hars	ENSMUSG00000001380	protein_coding	15115	1507.76	-0.147941	0.0577164	-2.56324	0.0103699	0.0277807
Iars2	ENSMUSG00000026618	protein_coding	381314	1981.66	-0.148975	0.0549997	-2.70865	0.00675585	0.0193043
Hexa	ENSMUSG00000025232	protein_coding	15211	8027.14	-0.149078	0.0643484	-2.31673	0.0205183	0.0495531
Tex261	ENSMUSG00000014748	protein_coding	NA	3216.85	-0.150413	0.0530489	-2.83537	0.0045773	0.013744
Mrps9	ENSMUSG00000060679	protein_coding	69527	1760.49	-0.150733	0.0564964	-2.66801	0.00763009	0.0214181
Parn	ENSMUSG00000022685	protein_coding	74108	1040.24	-0.152606	0.0644027	-2.36955	0.0178096	0.0440073
Sptlc2	ENSMUSG00000021036	protein_coding	20773	2284.46	-0.153425	0.0585781	-2.61915	0.00881498	0.0242195
Ube2j1	ENSMUSG00000028277	protein_coding	56228	4075.55	-0.153937	0.0365179	-4.21537	2.49e-05	0.00014155
Tbc1d31	ENSMUSG00000022364	protein_coding	210544	2810.29	-0.154204	0.0640975	-2.40577	0.0161385	0.0405239
Sfxn1	ENSMUSG00000021474	protein_coding	14057	2271.21	-0.154321	0.0435066	-3.54706	0.00038955	0.00161389
Med24	ENSMUSG00000017210	protein_coding	23989	2413.44	-0.154662	0.0496575	-3.11457	0.00184216	0.00628794
Rnf114	ENSMUSG00000006418	protein_coding	81018	3857.72	-0.155573	0.0491093	-3.1679	0.00153546	0.00537143
Gspt1	ENSMUSG00000062203	protein_coding	14852	4513.3	-0.155774	0.0423816	-3.67551	0.00023737	0.00104907
Ehbp1l1	ENSMUSG00000024937	protein_coding	114601	12983	-0.155959	0.0502126	-3.10598	0.0018965	0.00644433
Chtf8	ENSMUSG00000046691	protein_coding	NA	3848.33	-0.15617	0.0576005	-2.71127	0.00670267	0.0191678
Specc1	ENSMUSG00000042331	protein_coding	432572	4528.35	-0.156736	0.065549	-2.39113	0.0167966	0.0419096
Hnrnpab	ENSMUSG00000020358	protein_coding	15384	10354.6	-0.157038	0.0549874	-2.85589	0.00429167	0.0130113
Ndfip1	ENSMUSG00000024425	protein_coding	65113	3067.57	-0.157761	0.0452488	-3.48652	0.00048936	0.00197419
Atp6v1h	ENSMUSG00000033793	protein_coding	108664	2971.99	-0.158344	0.0659057	-2.40258	0.0162798	0.0408333
Ddx47	ENSMUSG00000030204	protein_coding	67755	2621.29	-0.158441	0.0606298	-2.61325	0.00896859	0.0245729
Senp2	ENSMUSG00000022855	protein_coding	75826	2387.01	-0.159152	0.0643186	-2.47443	0.0133449	0.034545
Entr1	ENSMUSG00000026927	protein_coding	68112	2749.6	-0.15925	0.0474291	-3.35765	0.00078609	0.00300362
Cep164	ENSMUSG00000043987	protein_coding	214552	2288.68	-0.159361	0.0545401	-2.9219	0.00347899	0.0108989
St13	ENSMUSG00000022403	protein_coding	70356	22020.3	-0.160476	0.0620708	-2.58537	0.00972758	0.0263125
Irak1	ENSMUSG00000031392	protein_coding	NA	4275.94	-0.160521	0.0496567	-3.23262	0.00122659	0.0044249
Edrf1	ENSMUSG00000039990	protein_coding	214764	1340.37	-0.160746	0.0590573	-2.72186	0.00649158	0.0186316
Ddx56	ENSMUSG00000004393	protein_coding	NA	1959.2	-0.161148	0.0609287	-2.64486	0.00817239	0.0227154
Acsl5	ENSMUSG00000024981	protein_coding	433256	1777.04	-0.161399	0.0613566	-2.6305	0.00852591	0.0235429
Rilpl1	ENSMUSG00000029392	protein_coding	75695	1118.97	-0.161553	0.0605124	-2.66976	0.00759064	0.0213272
Cops7a	ENSMUSG00000030127	protein_coding	26894	2973.53	-0.161604	0.0673082	-2.40095	0.0163526	0.0409764
Slc25a3	ENSMUSG00000061904	protein_coding	18674	20713.2	-0.161925	0.0506048	-3.19979	0.00137527	0.00487593
Pskh1	ENSMUSG00000048310	protein_coding	244631	1568.09	-0.162054	0.0605982	-2.67424	0.00748994	0.0210867
Wac	ENSMUSG00000024283	protein_coding	225131	4434.29	-0.162732	0.0672232	-2.42077	0.0154878	0.0391554
Ifngr2	ENSMUSG00000022965	protein_coding	NA	1509.57	-0.163464	0.059923	-2.7279	0.00637392	0.0183345
Ccdc167	ENSMUSG00000024018	protein_coding	68597	2538.22	-0.163615	0.0537791	-3.04236	0.00234733	0.00774417
Ttll1	ENSMUSG00000022442	protein_coding	319953	766.551	-0.165456	0.0673804	-2.45555	0.0140669	0.0361322
Atxn2	ENSMUSG00000042605	protein_coding	20239	4003.7	-0.165634	0.0512679	-3.23075	0.00123468	0.00444436
Chrac1	ENSMUSG00000068391	protein_coding	NA	1466.96	-0.165943	0.0713338	-2.32629	0.0200032	0.0485481
Rprd2	ENSMUSG00000028106	protein_coding	75137	3030.81	-0.166671	0.0425571	-3.9164	8.99e-05	0.00044238
Tmbim1	ENSMUSG00000006301	protein_coding	69660	3202.08	-0.167475	0.0628472	-2.66479	0.00770369	0.021608
Pbx2	ENSMUSG00000034673	protein_coding	NA	1711.71	-0.167574	0.0535297	-3.13048	0.00174521	0.00599537
Cant1	ENSMUSG00000025575	protein_coding	NA	3256.46	-0.16772	0.057061	-2.9393	0.00328951	0.0103951
Wtap	ENSMUSG00000060475	protein_coding	60532	2084.37	-0.167948	0.050242	-3.34279	0.00082942	0.00314338
4833439L19Rik	ENSMUSG00000025871	protein_coding	NA	2960.38	-0.168683	0.0511791	-3.29592	0.00098099	0.00364247
Shc1	ENSMUSG00000042626	protein_coding	20416	8285.02	-0.169557	0.0504718	-3.35944	0.000781	0.00298607
Lef1	ENSMUSG00000027985	protein_coding	16842	827.036	-0.169736	0.0728659	-2.32944	0.019836	0.0482098
Dennd6b	ENSMUSG00000015377	protein_coding	NA	684.672	-0.169846	0.0679968	-2.49785	0.0124949	0.0326914
Pprc1	ENSMUSG00000055491	protein_coding	226169	7837.88	-0.169854	0.053904	-3.15104	0.0016269	0.00564776
Cdc16	ENSMUSG00000038416	protein_coding	69957	2059.96	-0.170087	0.0732186	-2.323	0.020179	0.048903
Gm29585	ENSMUSG00000100548	antisense	NA	820.197	-0.170241	0.0650919	-2.61539	0.00891258	0.0244469
Cmpk1	ENSMUSG00000028719	protein_coding	66588	1211.84	-0.171521	0.0624377	-2.74708	0.00601293	0.0174204
Rab11a	ENSMUSG00000004771	protein_coding	53869	2270.23	-0.171654	0.0618218	-2.77659	0.00549332	0.0161027
Exosc3	ENSMUSG00000028322	protein_coding	66362	990.521	-0.17208	0.0689478	-2.4958	0.0125672	0.0328616
Plxna3	ENSMUSG00000031398	protein_coding	NA	2013.71	-0.17214	0.070682	-2.43541	0.0148749	0.0378222
Mtmr10	ENSMUSG00000030522	protein_coding	233315	1525.5	-0.172496	0.0734943	-2.34706	0.0189221	0.0463335
Usp16	ENSMUSG00000025616	protein_coding	74112	1787.59	-0.172601	0.0557765	-3.09451	0.00197138	0.00666384
Ndc1	ENSMUSG00000028614	protein_coding	72787	1244.8	-0.172779	0.073958	-2.33618	0.019482	0.0474737
Trim37	ENSMUSG00000018548	protein_coding	68729	2004.83	-0.173663	0.0608659	-2.85321	0.00432795	0.0131125
Setdb1	ENSMUSG00000015697	protein_coding	84505	3461.16	-0.17437	0.055944	-3.11686	0.00182788	0.00624653
Ephb4	ENSMUSG00000029710	protein_coding	13846	1631.42	-0.174832	0.0479557	-3.64569	0.00026668	0.001163
Qrich1	ENSMUSG00000006673	protein_coding	69232	8104.41	-0.174954	0.041866	-4.17891	2.93e-05	0.00016378
Dcaf5	ENSMUSG00000049106	protein_coding	320808	2157.96	-0.175051	0.0577892	-3.02914	0.00245254	0.0080285
Aars2	ENSMUSG00000023938	protein_coding	NA	1384.72	-0.175601	0.0639567	-2.74563	0.00603949	0.0174862
Fam160b2	ENSMUSG00000022095	protein_coding	239170	620.99	-0.17625	0.0750528	-2.34835	0.0188567	0.0461922
Raf1	ENSMUSG00000000441	protein_coding	110157	3409.26	-0.177507	0.0392822	-4.51876	6.22e-06	4.09e-05
Rabgef1	ENSMUSG00000025340	protein_coding	56715	1324.63	-0.177672	0.0597212	-2.97502	0.0029297	0.00939389
Wnt10b	ENSMUSG00000022996	protein_coding	NA	4718.07	-0.177871	0.0639562	-2.78113	0.00541694	0.0159123
Rnf183	ENSMUSG00000063851	protein_coding	76072	2733.83	-0.178059	0.0562536	-3.16528	0.00154932	0.00541472
Paip1	ENSMUSG00000025451	protein_coding	218693	3517.13	-0.178257	0.0538452	-3.31055	0.00093114	0.00348087
Pan3	ENSMUSG00000029647	protein_coding	72587	2171.62	-0.178555	0.0605196	-2.95037	0.00317397	0.010088
Mbd6	ENSMUSG00000025409	protein_coding	NA	13529.6	-0.179154	0.0635781	-2.81785	0.00483461	0.0144022
Vps35	ENSMUSG00000031696	protein_coding	65114	6575.48	-0.179294	0.0713471	-2.51298	0.0119717	0.0314905
Tmem43	ENSMUSG00000030095	protein_coding	NA	4177.67	-0.179311	0.0641893	-2.79347	0.00521451	0.0153724
Psmd2	ENSMUSG00000006998	protein_coding	21762	8219.48	-0.17932	0.042041	-4.26536	2e-05	0.00011616
R3hdm2	ENSMUSG00000025404	protein_coding	71750	5579.24	-0.179367	0.0400531	-4.47823	7.53e-06	4.82e-05
Cisd2	ENSMUSG00000028165	protein_coding	67006	1335.32	-0.179424	0.0560783	-3.19953	0.00137653	0.00487945
Znrf1	ENSMUSG00000033545	protein_coding	170737	2087.95	-0.180697	0.070101	-2.57767	0.00994695	0.026802
Fbxo22	ENSMUSG00000032309	protein_coding	71999	1336.62	-0.180739	0.0505955	-3.57224	0.00035394	0.00148571
Map1lc3b	ENSMUSG00000031812	protein_coding	67443	6737.59	-0.180774	0.0537737	-3.36175	0.0007745	0.00296497
Arhgap39	ENSMUSG00000033697	protein_coding	223666	1275.09	-0.181055	0.0708507	-2.55545	0.0106051	0.0283314
Gm4204	ENSMUSG00000079139	processed_pseudogene	NA	6282.89	-0.181467	0.0478826	-3.78982	0.00015076	0.00070147
	ENSMUSG00000095041	protein_coding	NA	14545.2	-0.18153	0.0480095	-3.78113	0.00015612	0.00072271
Usp21	ENSMUSG00000053483	protein_coding	NA	1583.67	-0.181691	0.0594208	-3.0577	0.00223041	0.00740693
Capn2	ENSMUSG00000026509	protein_coding	12334	7570.38	-0.181867	0.054459	-3.33952	0.00083923	0.00317195
Ints4	ENSMUSG00000025133	protein_coding	101861	1735.44	-0.182226	0.0506673	-3.59653	0.00032249	0.00136889
Usp30	ENSMUSG00000029592	protein_coding	100756	1642.25	-0.182315	0.0554134	-3.29008	0.00100159	0.00370759
Mindy1	ENSMUSG00000038712	protein_coding	75007	6827.6	-0.182459	0.046686	-3.90822	9.3e-05	0.00045626
Msl1	ENSMUSG00000052915	protein_coding	74026	7367.95	-0.182813	0.0328819	-5.55969	2.7e-08	2.99e-07
Cmtr1	ENSMUSG00000024019	protein_coding	74157	6459.51	-0.182816	0.0406575	-4.4965	6.91e-06	4.48e-05
NA	NA	NA	NA	1076.54	-0.183106	0.073328	-2.49708	0.0125219	0.0327526
Arel1	ENSMUSG00000042350	protein_coding	68497	1533.69	-0.183124	0.0617684	-2.96468	0.00302997	0.00968287
Psma3	ENSMUSG00000060073	protein_coding	19167	2458.9	-0.183357	0.0711274	-2.57786	0.00994145	0.0267911
Fam76a	ENSMUSG00000028878	protein_coding	230789	1205.78	-0.183592	0.0599773	-3.06101	0.00220588	0.00734161
Rwdd4a	ENSMUSG00000031568	protein_coding	192174	1145.02	-0.18394	0.071165	-2.58469	0.00974654	0.0263559
Psmd11	ENSMUSG00000017428	protein_coding	69077	3539.34	-0.18425	0.0466902	-3.94623	7.94e-05	0.0003958
Ppp2r1b	ENSMUSG00000032058	protein_coding	73699	2248.48	-0.185293	0.054577	-3.39508	0.00068608	0.00266242
Ube2a	ENSMUSG00000016308	protein_coding	NA	1185.53	-0.185294	0.0633312	-2.9258	0.00343574	0.0107911
2900089D17Rik	ENSMUSG00000087484	antisense	NA	818.052	-0.185355	0.0779937	-2.37654	0.017476	0.0433364
Trim32	ENSMUSG00000051675	protein_coding	69807	2481.48	-0.185648	0.0469547	-3.95376	7.69e-05	0.0003845
Poglut1	ENSMUSG00000034064	protein_coding	NA	1550.39	-0.185682	0.0652938	-2.84379	0.00445798	0.0134548
Creg1	ENSMUSG00000040713	protein_coding	433375	4861.11	-0.185702	0.0582717	-3.18683	0.0014384	0.00506906
Rsrc1	ENSMUSG00000034544	protein_coding	66880	1487.62	-0.185965	0.0569375	-3.26613	0.00109027	0.00398544
Phf13	ENSMUSG00000047777	protein_coding	NA	1943.23	-0.1861	0.0561881	-3.31209	0.00092602	0.00346459
Tra2b	ENSMUSG00000022858	protein_coding	20462	3198.9	-0.18764	0.0521672	-3.59691	0.00032202	0.00136755
Snrnp70	ENSMUSG00000063511	protein_coding	20637	16796	-0.187754	0.0537139	-3.49545	0.00047326	0.00191394
Fkbp4	ENSMUSG00000030357	protein_coding	14228	8471.56	-0.187943	0.0771023	-2.43758	0.014786	0.0376512
Upf3b	ENSMUSG00000036572	protein_coding	NA	1804.57	-0.188015	0.0636411	-2.95431	0.00313371	0.009981
Extl3	ENSMUSG00000021978	protein_coding	54616	2683.59	-0.188305	0.0584456	-3.22189	0.00127346	0.00456312
Uchl5	ENSMUSG00000018189	protein_coding	56207	740.09	-0.188613	0.080423	-2.34527	0.0190133	0.0465004
Atp6v1d	ENSMUSG00000021114	protein_coding	73834	2557.87	-0.189347	0.0652719	-2.90089	0.00372099	0.0115494
Slc18b1	ENSMUSG00000037455	protein_coding	76306	1007.11	-0.190323	0.0753216	-2.52681	0.0115104	0.0304094
Hdac6	ENSMUSG00000031161	protein_coding	NA	1937.06	-0.190548	0.0560459	-3.39985	0.00067422	0.00262203
Spats2	ENSMUSG00000051934	protein_coding	72572	3985.14	-0.191238	0.0424016	-4.51016	6.48e-06	4.24e-05
Polr3b	ENSMUSG00000034453	protein_coding	70428	1004.08	-0.191983	0.0711773	-2.69725	0.00699144	0.0198736
Coil	ENSMUSG00000033983	protein_coding	12812	693.966	-0.19256	0.0702671	-2.7404	0.00613643	0.0177414
Slc30a7	ENSMUSG00000054414	protein_coding	66500	1601.31	-0.193719	0.0625982	-3.09464	0.0019705	0.00666211
Zadh2	ENSMUSG00000049090	protein_coding	225791	2620.71	-0.194129	0.0599145	-3.2401	0.00119488	0.00432426
Cep63	ENSMUSG00000032534	protein_coding	28135	769.579	-0.194198	0.0783878	-2.4774	0.0132345	0.0343098
Ralbp1	ENSMUSG00000024096	protein_coding	19765	2909.62	-0.194871	0.0474731	-4.10487	4.05e-05	0.00021869
Mrpl42	ENSMUSG00000062981	protein_coding	67270	1385.85	-0.194969	0.0717488	-2.71738	0.00658002	0.0188615
Slc24a5	ENSMUSG00000035183	protein_coding	NA	791.392	-0.195276	0.0787284	-2.48038	0.0131244	0.0340927
Rars	ENSMUSG00000018848	protein_coding	104458	5501.27	-0.195649	0.0709313	-2.75829	0.00581041	0.0169283
Gapvd1	ENSMUSG00000026867	protein_coding	66691	3346.69	-0.19571	0.0714982	-2.73727	0.00619509	0.017891
Mark3	ENSMUSG00000007411	protein_coding	17169	2664.77	-0.196484	0.0465338	-4.22239	2.42e-05	0.00013782
Pcnx3	ENSMUSG00000054874	protein_coding	NA	6098.26	-0.196546	0.0530438	-3.70536	0.00021109	0.00094301
Qdpr	ENSMUSG00000015806	protein_coding	NA	959.309	-0.196683	0.0731752	-2.68784	0.00719157	0.0203731
Mterf3	ENSMUSG00000021519	protein_coding	66410	1169.76	-0.196926	0.0624314	-3.15427	0.001609	0.00559643
Riok1	ENSMUSG00000021428	protein_coding	71340	1055.57	-0.197453	0.0614968	-3.21079	0.00132372	0.00471065
Krcc1	ENSMUSG00000053012	protein_coding	57896	1689.41	-0.197618	0.0793607	-2.49012	0.0127701	0.0332915
Riox2	ENSMUSG00000022724	protein_coding	67014	1275.89	-0.19769	0.0755149	-2.61789	0.0088474	0.0242939
Srr	ENSMUSG00000001323	protein_coding	27364	1591.32	-0.198183	0.059229	-3.34605	0.00081972	0.00311247
Zranb1	ENSMUSG00000030967	protein_coding	360216	3327.55	-0.198337	0.0548029	-3.6191	0.00029563	0.00127033
Akr1b8	ENSMUSG00000029762	protein_coding	NA	3298.49	-0.199554	0.0837095	-2.38389	0.0171309	0.0426323
Gm10243	ENSMUSG00000095526	processed_pseudogene	NA	1087.23	-0.199558	0.0670703	-2.97536	0.00292647	0.00938519
C1d	ENSMUSG00000000581	protein_coding	57316	708.905	-0.19965	0.0712471	-2.80221	0.00507532	0.0150157
Letm1	ENSMUSG00000005299	protein_coding	56384	1316.55	-0.200773	0.0644153	-3.11685	0.00182796	0.00624653
Zcchc2	ENSMUSG00000038866	protein_coding	227449	2786.23	-0.200821	0.0797343	-2.51862	0.0117815	0.0310532
H2-D1	ENSMUSG00000073411	protein_coding	NA	15787.5	-0.200952	0.0755432	-2.66009	0.00781197	0.0218812
Smyd5	ENSMUSG00000033706	protein_coding	232187	3406.23	-0.200953	0.0761062	-2.64042	0.00828029	0.0229801
Dph6	ENSMUSG00000057147	protein_coding	66632	864.949	-0.201304	0.0797474	-2.52427	0.0115939	0.0306034
Tdrd7	ENSMUSG00000035517	protein_coding	100121	2877.17	-0.20134	0.0552281	-3.64562	0.00026675	0.00116305
Otud1	ENSMUSG00000043415	protein_coding	NA	1000.08	-0.201447	0.0854174	-2.35838	0.0183547	0.0451451
Elavl1	ENSMUSG00000040028	protein_coding	15568	3008.98	-0.201583	0.0490985	-4.10568	4.03e-05	0.00021805
Hoxc13	ENSMUSG00000001655	protein_coding	NA	1017.95	-0.202108	0.0846298	-2.38814	0.0169337	0.0421877
Necap1	ENSMUSG00000030327	protein_coding	67602	2110.45	-0.202192	0.0629112	-3.21393	0.00130932	0.00466576
Srrm1	ENSMUSG00000028809	protein_coding	51796	7234.7	-0.20249	0.0480319	-4.21575	2.49e-05	0.00014136
Rpl7	ENSMUSG00000043716	protein_coding	19989	48190.9	-0.203185	0.0683233	-2.97388	0.00294058	0.00942709
Ssbp1	ENSMUSG00000029911	protein_coding	381760	1794.62	-0.203823	0.0717058	-2.84249	0.00447628	0.0134988
Pdzd7	ENSMUSG00000074818	protein_coding	100503041	1649.23	-0.204083	0.063423	-3.21781	0.00129173	0.00461582
Exoc1	ENSMUSG00000036435	protein_coding	69940	1664.22	-0.204433	0.0611184	-3.34486	0.00082323	0.00312437
Pole3	ENSMUSG00000028394	protein_coding	NA	1910.47	-0.204534	0.0607058	-3.36927	0.00075368	0.00289259
Snrpa1	ENSMUSG00000030512	protein_coding	68981	1210.57	-0.20505	0.0742201	-2.76273	0.00573206	0.0167242
Jtb	ENSMUSG00000027937	protein_coding	23922	1257.25	-0.205383	0.0707251	-2.90396	0.00368472	0.0114564
Ppp5c	ENSMUSG00000003099	protein_coding	19060	2365.8	-0.205791	0.0519109	-3.96432	7.36e-05	0.00037021
Acot9	ENSMUSG00000025287	protein_coding	NA	1654.92	-0.206085	0.0525617	-3.92082	8.82e-05	0.00043564
Dpp9	ENSMUSG00000001229	protein_coding	224897	2648.57	-0.206305	0.0647913	-3.18414	0.00145183	0.00511141
Dnajc7	ENSMUSG00000014195	protein_coding	56354	5216.66	-0.206351	0.0512771	-4.02423	5.72e-05	0.00029689
Acvr1b	ENSMUSG00000000532	protein_coding	11479	1461.78	-0.206944	0.0710361	-2.91322	0.00357722	0.0111643
Naxe	ENSMUSG00000028070	protein_coding	NA	2588.8	-0.207155	0.0883053	-2.3459	0.0189815	0.0464349
Trappc9	ENSMUSG00000047921	protein_coding	76510	1398.73	-0.207351	0.0765604	-2.70834	0.00676213	0.0193134
Pogz	ENSMUSG00000038902	protein_coding	229584	2405.23	-0.207409	0.0743007	-2.79149	0.00524668	0.0154597
Gm26130	ENSMUSG00000065105	snoRNA	NA	13728.5	-0.207745	0.0429461	-4.83735	1.32e-06	1.01e-05
Dennd4b	ENSMUSG00000042404	protein_coding	229541	537.838	-0.208642	0.0872481	-2.39136	0.016786	0.0418888
Tbc1d22a	ENSMUSG00000051864	protein_coding	223754	2151.11	-0.208746	0.0521833	-4.00025	6.33e-05	0.0003241
Galc	ENSMUSG00000021003	protein_coding	14420	961.219	-0.20902	0.0793059	-2.63561	0.00839855	0.0232443
Ppp1r8	ENSMUSG00000028882	protein_coding	NA	1461.19	-0.2093	0.0640374	-3.2684	0.00108158	0.00395756
Tcf25	ENSMUSG00000001472	protein_coding	66855	6594.18	-0.209353	0.0566293	-3.6969	0.00021824	0.00097187
Lcmt1	ENSMUSG00000030763	protein_coding	30949	970.571	-0.2095	0.0778455	-2.69123	0.00711886	0.020186
Naa40	ENSMUSG00000024764	protein_coding	70999	2336.61	-0.209787	0.0547591	-3.83109	0.00012757	0.00060335
Nup205	ENSMUSG00000038759	protein_coding	70699	3238.82	-0.209976	0.0740713	-2.83477	0.00458581	0.0137605
Atg5	ENSMUSG00000038160	protein_coding	11793	1200.66	-0.211783	0.0637084	-3.32425	0.00088656	0.00333414
Pex26	ENSMUSG00000067825	protein_coding	74043	529.504	-0.21185	0.08417	-2.51693	0.0118381	0.0311844
Gramd3	ENSMUSG00000001700	protein_coding	107022	538.604	-0.211907	0.0834367	-2.53973	0.0110938	0.0294287
Ncor2	ENSMUSG00000029478	protein_coding	20602	4903.47	-0.211958	0.0719142	-2.94738	0.00320482	0.0101735
Gtf2h1	ENSMUSG00000006599	protein_coding	14884	3485.81	-0.212342	0.0717594	-2.95908	0.00308554	0.00984659
Prr13	ENSMUSG00000023048	protein_coding	66151	40540	-0.213131	0.0491207	-4.33893	1.43e-05	8.66e-05
Copb2	ENSMUSG00000032458	protein_coding	50797	4546.68	-0.213318	0.0713858	-2.98825	0.00280584	0.00904148
Ybx1	ENSMUSG00000028639	protein_coding	22608	12041.3	-0.213341	0.0473518	-4.50546	6.62e-06	4.32e-05
Sumf2	ENSMUSG00000025538	protein_coding	67902	13290.2	-0.213957	0.0334511	-6.39611	1.59e-10	2.61e-09
Igip	ENSMUSG00000110185	protein_coding	NA	844.451	-0.21414	0.0881725	-2.42864	0.0151554	0.0384189
Tspan6	ENSMUSG00000067377	protein_coding	NA	776.512	-0.214297	0.0722659	-2.9654	0.00302295	0.00966384
Knop1	ENSMUSG00000030980	protein_coding	66356	3016.8	-0.214437	0.0608427	-3.52445	0.00042436	0.0017402
Nsf	ENSMUSG00000034187	protein_coding	18195	2098.6	-0.214449	0.0571151	-3.75468	0.00017357	0.00079216
Cmtr2	ENSMUSG00000046441	protein_coding	NA	577.36	-0.214629	0.083064	-2.5839	0.00976902	0.0264009
Tor2a	ENSMUSG00000009563	protein_coding	NA	784.312	-0.21481	0.079788	-2.69226	0.00709686	0.0201331
Tspyl1	ENSMUSG00000047514	protein_coding	22110	2094.51	-0.215495	0.0489081	-4.40612	1.05e-05	6.56e-05
1700102P08Rik	ENSMUSG00000032611	protein_coding	112418	2811.86	-0.216685	0.0456183	-4.74995	2.03e-06	1.5e-05
Rab20	ENSMUSG00000031504	protein_coding	NA	460.886	-0.216887	0.0857943	-2.52798	0.011472	0.0303212
Tnfaip2	ENSMUSG00000021281	protein_coding	NA	12677.1	-0.217723	0.0651561	-3.34156	0.0008331	0.0031547
Gsr	ENSMUSG00000031584	protein_coding	14782	2826.99	-0.217995	0.0411732	-5.29459	1.19e-07	1.15e-06
Eif3l	ENSMUSG00000033047	protein_coding	223691	8415.6	-0.218055	0.0573142	-3.80455	0.00014206	0.00066441
Iars	ENSMUSG00000037851	protein_coding	105148	8431.28	-0.218127	0.0783725	-2.78321	0.00538239	0.0158261
Nup107	ENSMUSG00000052798	protein_coding	103468	2109.18	-0.218471	0.061977	-3.52504	0.00042342	0.00173793
Clpb	ENSMUSG00000001829	protein_coding	20480	1941.1	-0.21852	0.0680598	-3.21071	0.00132409	0.00471104
Hmga2	ENSMUSG00000056758	protein_coding	15364	42043.5	-0.218607	0.0588228	-3.71636	0.00020211	0.00090827
Tmc4	ENSMUSG00000019734	protein_coding	353499	4209.63	-0.218933	0.0574288	-3.81225	0.00013771	0.00064621
Stx2	ENSMUSG00000029428	protein_coding	13852	1385.18	-0.219136	0.0754838	-2.90309	0.00369499	0.0114834
Tpbg	ENSMUSG00000035274	protein_coding	NA	566.84	-0.219265	0.0808499	-2.71201	0.00668772	0.019131
Ddx54	ENSMUSG00000029599	protein_coding	71990	3241.38	-0.219321	0.0655166	-3.34756	0.00081525	0.00309679
Mlkl	ENSMUSG00000012519	protein_coding	74568	1350.63	-0.220187	0.0627816	-3.50718	0.00045288	0.00184176
Foxj2	ENSMUSG00000003154	protein_coding	60611	2055.18	-0.220561	0.0594231	-3.71171	0.00020587	0.00092332
Sbds	ENSMUSG00000025337	protein_coding	66711	2138.57	-0.220677	0.0518688	-4.25451	2.1e-05	0.0001213
Zgpat	ENSMUSG00000027582	protein_coding	229007	3567.27	-0.220837	0.04343	-5.08491	3.68e-07	3.17e-06
Sfxn2	ENSMUSG00000025036	protein_coding	94279	665.365	-0.220929	0.093892	-2.35301	0.0186221	0.0457059
Pam16	ENSMUSG00000014301	protein_coding	66449	2121.93	-0.221198	0.0609655	-3.62825	0.00028535	0.00123348
Cct4	ENSMUSG00000007739	protein_coding	12464	14496.8	-0.221522	0.0531623	-4.16689	3.09e-05	0.00017173
Cdc5l	ENSMUSG00000023932	protein_coding	71702	2232.3	-0.221559	0.0557616	-3.97332	7.09e-05	0.00035798
Tomm34	ENSMUSG00000018322	protein_coding	67145	2516.33	-0.22186	0.0734387	-3.02102	0.00251922	0.00822008
Ifi35	ENSMUSG00000010358	protein_coding	70110	1339.1	-0.22232	0.0949951	-2.34033	0.0192667	0.0470122
U2af2	ENSMUSG00000030435	protein_coding	22185	8119.1	-0.222549	0.0402882	-5.52391	3.32e-08	3.6e-07
Gan	ENSMUSG00000052557	protein_coding	209239	831.28	-0.22258	0.0936532	-2.37663	0.0174714	0.0433337
NA	NA	NA	NA	19077.9	-0.222984	0.0774231	-2.88007	0.00397585	0.0122171
Zmiz2	ENSMUSG00000041164	protein_coding	52915	4506.28	-0.22383	0.0661528	-3.38353	0.00071561	0.00276577
Zfand3	ENSMUSG00000044477	protein_coding	21769	4099.2	-0.223841	0.0562832	-3.97705	6.98e-05	0.000353
Alg9	ENSMUSG00000032059	protein_coding	102580	745.551	-0.223945	0.0944008	-2.37227	0.0176789	0.0437378
Pttg1	ENSMUSG00000020415	protein_coding	NA	1330.57	-0.224038	0.0822836	-2.72276	0.00647397	0.0185928
Icmt	ENSMUSG00000039662	protein_coding	NA	4295.71	-0.224139	0.0484301	-4.6281	3.69e-06	2.56e-05
NA	NA	NA	NA	570.847	-0.22419	0.0960331	-2.3345	0.0195693	0.0476455
Oser1	ENSMUSG00000035399	protein_coding	66680	2095.86	-0.224265	0.0705504	-3.1788	0.00147888	0.00519536
Cdk11b	ENSMUSG00000029062	protein_coding	12537	3575.42	-0.224359	0.0545332	-4.11417	3.89e-05	0.00021112
Tvp23a	ENSMUSG00000050908	protein_coding	383103	1089.01	-0.224431	0.0690933	-3.24824	0.00116123	0.00421509
Stambpl1	ENSMUSG00000024776	protein_coding	76630	1171	-0.225829	0.0769017	-2.9366	0.00331833	0.0104716
Ppme1	ENSMUSG00000030718	protein_coding	72590	2830.1	-0.225865	0.075631	-2.9864	0.0028228	0.0090913
Gm9118	ENSMUSG00000112825	processed_pseudogene	NA	1812.89	-0.225868	0.0738311	-3.05926	0.00221884	0.00737428
Hagh	ENSMUSG00000024158	protein_coding	14651	1711.19	-0.226463	0.0682722	-3.31706	0.00090971	0.0034106
Gm15122	ENSMUSG00000087672	antisense	NA	546.198	-0.226765	0.0864685	-2.62251	0.00872836	0.0240288
Khdc4	ENSMUSG00000028060	protein_coding	74200	3680.14	-0.227228	0.0647788	-3.50775	0.00045191	0.00183866
Pvr	ENSMUSG00000040511	protein_coding	NA	4338.27	-0.227353	0.0615458	-3.69405	0.00022071	0.00098187
Snx15	ENSMUSG00000024787	protein_coding	69024	1850.38	-0.227504	0.06897	-3.29859	0.0009717	0.00361168
Tada2a	ENSMUSG00000018651	protein_coding	217031	1459.03	-0.227849	0.0631049	-3.61063	0.00030545	0.0013082
Diaph1	ENSMUSG00000024456	protein_coding	13367	2015.52	-0.228468	0.0586076	-3.89826	9.69e-05	0.00047351
Bcr	ENSMUSG00000009681	protein_coding	110279	2205.21	-0.22867	0.0505077	-4.52743	5.97e-06	3.94e-05
Atr	ENSMUSG00000032409	protein_coding	245000	1246.48	-0.229062	0.0915793	-2.50124	0.0123758	0.0324125
Reep5	ENSMUSG00000005873	protein_coding	13476	3017.21	-0.229082	0.0660761	-3.46694	0.00052641	0.00210496
Zfp362	ENSMUSG00000028799	protein_coding	230761	933.601	-0.229576	0.067703	-3.39093	0.00069656	0.00270136
Aco2	ENSMUSG00000022477	protein_coding	11429	7932.34	-0.229785	0.0576567	-3.9854	6.74e-05	0.00034215
Otud5	ENSMUSG00000031154	protein_coding	NA	4118.32	-0.230609	0.0410737	-5.61451	1.97e-08	2.25e-07
Ccdc157	ENSMUSG00000051427	protein_coding	NA	977.739	-0.230718	0.0760789	-3.03261	0.00242446	0.00795235
Smarca4	ENSMUSG00000032187	protein_coding	20586	3910.27	-0.230808	0.0690366	-3.34327	0.00082796	0.00313851
Dph3	ENSMUSG00000021905	protein_coding	NA	1277.1	-0.230884	0.0599429	-3.85173	0.00011729	0.00055967
Lrrc59	ENSMUSG00000020869	protein_coding	98238	13317.4	-0.231377	0.0526976	-4.39064	1.13e-05	7e-05
Zfp639	ENSMUSG00000027667	protein_coding	67778	1581.35	-0.232023	0.0567327	-4.08976	4.32e-05	0.00023232
NA	NA	NA	NA	3017.09	-0.232145	0.0882226	-2.63135	0.00850469	0.023495
Lmbr1l	ENSMUSG00000022999	protein_coding	74775	2868.4	-0.2336	0.0557158	-4.1927	2.76e-05	0.00015502
Txnl1	ENSMUSG00000024583	protein_coding	53382	4363.85	-0.233612	0.0631108	-3.70162	0.00021423	0.00095561
Armh3	ENSMUSG00000039901	protein_coding	71617	794.459	-0.233903	0.0760147	-3.07708	0.00209039	0.0070009
Ift57	ENSMUSG00000032965	protein_coding	73916	637.432	-0.234092	0.0815407	-2.87087	0.00409349	0.0125192
Ube2d-ps	ENSMUSG00000083844	transcribed_unprocessed_pseudogene	NA	715.628	-0.234492	0.0746613	-3.14074	0.00168522	0.00581461
Tent2	ENSMUSG00000042167	protein_coding	100715	1781.3	-0.235165	0.0575469	-4.08649	4.38e-05	0.00023486
Hjurp	ENSMUSG00000044783	protein_coding	212427	4734.78	-0.235257	0.0967117	-2.43256	0.0149926	0.0380681
Hjurp	ENSMUSG00000044783	protein_coding	381280	4734.78	-0.235257	0.0967117	-2.43256	0.0149926	0.0380681
Fstl1	ENSMUSG00000022816	protein_coding	14314	6384.53	-0.23528	0.0993346	-2.36856	0.0178575	0.0441016
Anxa5	ENSMUSG00000027712	protein_coding	11747	11047.7	-0.235294	0.0802172	-2.93321	0.00335472	0.0105711
Stimate	ENSMUSG00000006526	protein_coding	69179	940.245	-0.235424	0.0756497	-3.11203	0.00185806	0.0063315
Serpinh1	ENSMUSG00000070436	protein_coding	NA	34240.5	-0.235511	0.0901516	-2.61239	0.00899115	0.0246215
Nol9	ENSMUSG00000028948	protein_coding	74035	1936.33	-0.235729	0.0675146	-3.49152	0.00048028	0.00194019
Cop1	ENSMUSG00000040782	protein_coding	26374	1495.27	-0.235845	0.0847402	-2.78315	0.0053834	0.0158266
Arf3	ENSMUSG00000051853	protein_coding	11842	9503.11	-0.236319	0.0508598	-4.64649	3.38e-06	2.37e-05
Slc30a9	ENSMUSG00000029221	protein_coding	109108	6331.59	-0.236412	0.0460566	-5.13307	2.85e-07	2.53e-06
Hsp90ab1	ENSMUSG00000023944	protein_coding	15516	163029	-0.236498	0.0583744	-4.05141	5.09e-05	0.00026842
Bpnt1	ENSMUSG00000026617	protein_coding	23827	1414.27	-0.236499	0.0624122	-3.78931	0.00015107	0.00070273
Fam118a	ENSMUSG00000022434	protein_coding	73225	1372.89	-0.236682	0.0658042	-3.59676	0.0003222	0.00136798
Tmem183a	ENSMUSG00000042305	protein_coding	57439	2000.37	-0.236732	0.0449524	-5.26629	1.39e-07	1.32e-06
Zfp90	ENSMUSG00000031907	protein_coding	22751	453.213	-0.236842	0.0842711	-2.81048	0.00494682	0.014693
Dyrk1a	ENSMUSG00000022897	protein_coding	13548	2526.12	-0.237564	0.0630896	-3.76551	0.00016621	0.00076319
Etf1	ENSMUSG00000024360	protein_coding	225363	7208.87	-0.237565	0.0550033	-4.3191	1.57e-05	9.36e-05
Babam2	ENSMUSG00000052139	protein_coding	107976	3055.13	-0.237731	0.0832794	-2.85462	0.00430882	0.0130589
Fam193b	ENSMUSG00000021495	protein_coding	NA	4068.6	-0.237947	0.0647896	-3.67261	0.00024008	0.00105975
Vim	ENSMUSG00000026728	protein_coding	22352	68954	-0.237995	0.0817837	-2.91006	0.0036136	0.0112701
Gm10353	ENSMUSG00000114220	antisense	NA	484.082	-0.238144	0.0975243	-2.44189	0.0146106	0.0373016
Itga3	ENSMUSG00000001507	protein_coding	16400	8872.59	-0.238321	0.0810852	-2.93914	0.00329125	0.0103988
Tsen2	ENSMUSG00000042389	protein_coding	381802	476.43	-0.238476	0.0940295	-2.53619	0.0112067	0.029685
Tfpt	ENSMUSG00000006335	protein_coding	69714	620.04	-0.239019	0.10076	-2.37216	0.0176843	0.0437382
Brat1	ENSMUSG00000000148	protein_coding	231841	613.338	-0.23973	0.0878507	-2.72884	0.00635584	0.0182883
Banp	ENSMUSG00000025316	protein_coding	53325	1569.22	-0.240254	0.0554006	-4.33666	1.45e-05	8.73e-05
Recql	ENSMUSG00000030243	protein_coding	19691	877.038	-0.240602	0.071663	-3.35741	0.00078676	0.00300557
Neurl4	ENSMUSG00000047284	protein_coding	NA	2533.69	-0.241199	0.0514254	-4.69027	2.73e-06	1.96e-05
Runx3	ENSMUSG00000070691	protein_coding	12399	1270.72	-0.241698	0.0748544	-3.22891	0.00124264	0.00446856
Actg1	ENSMUSG00000062825	protein_coding	11465	27866.2	-0.241698	0.07964	-3.03489	0.00240626	0.00790615
Rhno1	ENSMUSG00000048668	protein_coding	NA	1489.51	-0.2418	0.0696776	-3.47027	0.00051994	0.00208322
Brms1l	ENSMUSG00000012076	protein_coding	52592	1111.7	-0.241801	0.0883009	-2.73837	0.00617445	0.0178371
Elp2	ENSMUSG00000024271	protein_coding	58523	2830.35	-0.242186	0.0399457	-6.06286	1.34e-09	1.91e-08
Glrx2	ENSMUSG00000018196	protein_coding	69367	705.556	-0.242297	0.0669125	-3.62111	0.00029334	0.0012632
Cpsf7	ENSMUSG00000034820	protein_coding	269061	4280.7	-0.242511	0.0471272	-5.14588	2.66e-07	2.37e-06
Osbp2	ENSMUSG00000020435	protein_coding	74309	359.288	-0.242722	0.0936475	-2.59186	0.00954572	0.0258978
Sf3a1	ENSMUSG00000002129	protein_coding	67465	4127.09	-0.242901	0.0471948	-5.14679	2.65e-07	2.36e-06
Rap1gap2	ENSMUSG00000038807	protein_coding	380711	679.047	-0.243166	0.0876655	-2.77379	0.00554071	0.0162285
Lcor	ENSMUSG00000025019	protein_coding	212391	6391.08	-0.243441	0.0877726	-2.77354	0.00554493	0.0162383
Gaa	ENSMUSG00000025579	protein_coding	14387	14502.4	-0.243748	0.0531695	-4.58437	4.55e-06	3.1e-05
Nop58	ENSMUSG00000026020	protein_coding	55989	5542.99	-0.243772	0.0612162	-3.98216	6.83e-05	0.00034618
Dnajc16	ENSMUSG00000040697	protein_coding	214063	1062.52	-0.24389	0.0778053	-3.13463	0.00172074	0.00592364
Tcn2	ENSMUSG00000020432	protein_coding	21452	2146.73	-0.244067	0.0669317	-3.6465	0.00026583	0.00115959
D16Ertd472e	ENSMUSG00000022864	protein_coding	67102	582.405	-0.244119	0.0982356	-2.48503	0.0129539	0.0337124
Ccar2	ENSMUSG00000033712	protein_coding	219158	1514.14	-0.244254	0.056461	-4.32606	1.52e-05	9.1e-05
2610002M06Rik	ENSMUSG00000031242	protein_coding	NA	719.917	-0.244854	0.0953698	-2.56741	0.0102461	0.0274815
Marveld1	ENSMUSG00000044345	protein_coding	NA	2159.7	-0.245056	0.0943938	-2.5961	0.00942882	0.0256151
Rbm42	ENSMUSG00000036733	protein_coding	NA	3636.71	-0.245062	0.104852	-2.33723	0.0194274	0.0473598
Cd47	ENSMUSG00000055447	protein_coding	16423	6281.91	-0.245176	0.0647513	-3.78643	0.00015283	0.00070966
Zfp318	ENSMUSG00000015597	protein_coding	57908	1029.03	-0.245546	0.0938246	-2.61708	0.00886865	0.0243412
Eif3h	ENSMUSG00000022312	protein_coding	68135	18295.6	-0.24567	0.0746788	-3.28969	0.00100297	0.00370977
Kdm1a	ENSMUSG00000036940	protein_coding	99982	3107.42	-0.246166	0.044035	-5.59023	2.27e-08	2.55e-07
Dusp6	ENSMUSG00000019960	protein_coding	NA	3596.55	-0.246414	0.0804133	-3.06435	0.00218145	0.00726964
Nap1l1	ENSMUSG00000058799	protein_coding	53605	25545.7	-0.246571	0.0428306	-5.75689	8.57e-09	1.04e-07
Exosc8	ENSMUSG00000027752	protein_coding	69639	1338.08	-0.246575	0.0714782	-3.44966	0.0005613	0.00222386
Zmym3	ENSMUSG00000031310	protein_coding	NA	1774.19	-0.24687	0.0854241	-2.88993	0.00385322	0.0119028
Plekhb2	ENSMUSG00000026123	protein_coding	226971	4517.7	-0.247917	0.0427966	-5.79291	6.92e-09	8.61e-08
Hmgb3	ENSMUSG00000015217	protein_coding	NA	530.087	-0.248055	0.104353	-2.37709	0.0174498	0.043307
Frmd8	ENSMUSG00000024816	protein_coding	67457	3910.39	-0.248108	0.0604584	-4.10377	4.06e-05	0.0002196
Smarcal1	ENSMUSG00000039354	protein_coding	54380	978.997	-0.248693	0.0662649	-3.75301	0.00017472	0.00079643
Mtfr1l	ENSMUSG00000046671	protein_coding	76824	2898.37	-0.249098	0.0590335	-4.2196	2.45e-05	0.00013932
Klc4	ENSMUSG00000003546	protein_coding	NA	872.391	-0.249125	0.0625897	-3.98029	6.88e-05	0.00034861
Whrn	ENSMUSG00000039137	protein_coding	73750	2753.51	-0.249317	0.0835499	-2.98405	0.0028446	0.00915013
Cbarp	ENSMUSG00000035640	protein_coding	NA	922.426	-0.249323	0.0999015	-2.49568	0.0125715	0.0328681
Tars	ENSMUSG00000022241	protein_coding	110960	9135.52	-0.249395	0.0731762	-3.40814	0.00065407	0.00254912
Carm1	ENSMUSG00000032185	protein_coding	59035	4714.31	-0.249501	0.0378621	-6.58972	4.41e-11	8.14e-10
Yy1	ENSMUSG00000021264	protein_coding	22632	3729.34	-0.250536	0.062276	-4.02299	5.75e-05	0.00029811
Ciapin1	ENSMUSG00000031781	protein_coding	109006	1590.75	-0.250726	0.0930463	-2.69464	0.00704649	0.0200027
Gm10575	ENSMUSG00000073787	processed_transcript	NA	527.347	-0.251454	0.0924922	-2.71866	0.00655479	0.0188011
Zfp692	ENSMUSG00000037243	protein_coding	NA	2101.8	-0.251715	0.0693643	-3.62889	0.00028465	0.0012313
Npepl1	ENSMUSG00000039263	protein_coding	228961	2707.07	-0.251785	0.0757725	-3.32291	0.00089083	0.00334815
Gm35339	ENSMUSG00000109179	protein_coding	102638882	354.494	-0.252244	0.106961	-2.35828	0.0183601	0.0451523
Lman2	ENSMUSG00000021484	protein_coding	66890	6342.74	-0.252534	0.0572461	-4.41138	1.03e-05	6.42e-05
Josd1	ENSMUSG00000022426	protein_coding	74158	3684.24	-0.253106	0.0431085	-5.87137	4.32e-09	5.6e-08
Gtf3c1	ENSMUSG00000032777	protein_coding	233863	3960.85	-0.253139	0.0610468	-4.14664	3.37e-05	0.00018576
NA	NA	NA	NA	2153.24	-0.25375	0.0881851	-2.87746	0.00400885	0.0123039
Bloc1s2	ENSMUSG00000057506	protein_coding	NA	1660.22	-0.253967	0.078062	-3.25341	0.00114031	0.00414744
Med19	ENSMUSG00000027080	protein_coding	381379	992.825	-0.25403	0.0701301	-3.62227	0.00029203	0.00125845
Gipc1	ENSMUSG00000019433	protein_coding	NA	1193.82	-0.254447	0.104943	-2.42463	0.0153238	0.0387625
Rbms1	ENSMUSG00000026970	protein_coding	56878	6546.37	-0.254543	0.0705591	-3.60751	0.00030915	0.00132217
Ppp1r21	ENSMUSG00000034709	protein_coding	73825	1267.5	-0.255356	0.0599056	-4.26265	2.02e-05	0.00011732
Suclg2	ENSMUSG00000061838	protein_coding	20917	1819.64	-0.255692	0.0617477	-4.14092	3.46e-05	0.00019
Polr3h	ENSMUSG00000022476	protein_coding	78929	2815.87	-0.25601	0.08038	-3.185	0.00144753	0.00509826
Pex11b	ENSMUSG00000028102	protein_coding	18632	4703.33	-0.256292	0.0625051	-4.10033	4.13e-05	0.00022276
H1f0	ENSMUSG00000096210	protein_coding	NA	8331.11	-0.256418	0.093003	-2.75709	0.00583184	0.0169756
Elk3	ENSMUSG00000008398	protein_coding	13713	4989.79	-0.257912	0.049411	-5.21972	1.79e-07	1.66e-06
Svil	ENSMUSG00000024236	protein_coding	225115	1312.7	-0.258018	0.0915307	-2.81892	0.00481853	0.0143614
Atxn10	ENSMUSG00000016541	protein_coding	54138	7431.07	-0.258215	0.0453241	-5.69709	1.22e-08	1.44e-07
Os9	ENSMUSG00000040462	protein_coding	216440	6344.74	-0.259074	0.0787463	-3.28998	0.00100194	0.00370811
Rrp1b	ENSMUSG00000058392	protein_coding	72462	1504.96	-0.259203	0.0717503	-3.61258	0.00030317	0.00129995
Cep131	ENSMUSG00000039781	protein_coding	NA	1346.51	-0.259692	0.0807207	-3.21716	0.00129465	0.00462171
Suclg1	ENSMUSG00000052738	protein_coding	56451	1711	-0.259976	0.0783352	-3.31877	0.00090415	0.00339348
Eif1	ENSMUSG00000035530	protein_coding	20918	24050	-0.260106	0.0880714	-2.95335	0.00314345	0.0100084
Pfdn6	ENSMUSG00000024309	protein_coding	NA	1604.81	-0.260732	0.107724	-2.42037	0.0155046	0.0391812
1700040L08Rik	ENSMUSG00000107406	antisense	NA	338.924	-0.260856	0.104182	-2.50386	0.0122846	0.0322015
Atg7	ENSMUSG00000030314	protein_coding	74244	1461.05	-0.260863	0.0547878	-4.76133	1.92e-06	1.42e-05
Usp36	ENSMUSG00000033909	protein_coding	72344	4396.96	-0.260926	0.055785	-4.67736	2.91e-06	2.07e-05
Cybc1	ENSMUSG00000039294	protein_coding	217370	2029.1	-0.261353	0.064701	-4.03939	5.36e-05	0.00028034
Clvs1	ENSMUSG00000041216	protein_coding	74438	581.454	-0.261503	0.108414	-2.41208	0.0158618	0.0399452
Mettl3	ENSMUSG00000022160	protein_coding	NA	1550.97	-0.262221	0.0619662	-4.23168	2.32e-05	0.00013279
Mnt	ENSMUSG00000000282	protein_coding	17428	2499.3	-0.262464	0.0688046	-3.81462	0.00013639	0.00064087
Ift81	ENSMUSG00000029469	protein_coding	12589	670.113	-0.262772	0.0760013	-3.45747	0.00054528	0.00216848
Calm3	ENSMUSG00000019370	protein_coding	12315	3743.37	-0.26294	0.0803567	-3.27216	0.00106727	0.00391399
Use1	ENSMUSG00000002395	protein_coding	67023	6946.95	-0.263006	0.0488112	-5.38823	7.12e-08	7.26e-07
Agbl5	ENSMUSG00000029165	protein_coding	231093	1936.05	-0.263413	0.106556	-2.47207	0.0134332	0.0347356
Sipa1	ENSMUSG00000056917	protein_coding	20469	2445.91	-0.264138	0.0821956	-3.21353	0.00131112	0.00466948
Rps3a1	ENSMUSG00000028081	protein_coding	20091	41534.7	-0.264909	0.0851899	-3.10962	0.00187326	0.0063749
Tpm1	ENSMUSG00000032366	protein_coding	22003	11081.7	-0.264923	0.0548234	-4.8323	1.35e-06	1.03e-05
Kif2a	ENSMUSG00000021693	protein_coding	16563	4737.16	-0.265288	0.0628956	-4.21791	2.47e-05	0.0001402
Slc25a46	ENSMUSG00000024259	protein_coding	67453	1966.56	-0.265373	0.0669779	-3.9621	7.43e-05	0.0003728
Eif4g3	ENSMUSG00000028760	protein_coding	230861	4321.47	-0.265492	0.0498235	-5.32866	9.89e-08	9.73e-07
Zfp839	ENSMUSG00000021271	protein_coding	72805	665.582	-0.266034	0.075142	-3.54042	0.00039949	0.00164981
Usp34	ENSMUSG00000056342	protein_coding	17847	6836.72	-0.266101	0.0602425	-4.41716	1e-05	6.27e-05
L3mbtl2	ENSMUSG00000022394	protein_coding	214669	1314.52	-0.266112	0.0644793	-4.12709	3.67e-05	0.00020087
AW011738	ENSMUSG00000078349	processed_transcript	NA	575.979	-0.266133	0.105636	-2.51934	0.0117574	0.0309988
Usp35	ENSMUSG00000035713	protein_coding	NA	735.573	-0.266202	0.0761097	-3.49761	0.00046944	0.00189977
NA	NA	NA	NA	30447.2	-0.266232	0.0872209	-3.05239	0.00227029	0.00752697
Wipi2	ENSMUSG00000029578	protein_coding	74781	4666.29	-0.266317	0.0551989	-4.82467	1.4e-06	1.07e-05
Tmem230	ENSMUSG00000027341	protein_coding	70612	3235.71	-0.266412	0.0577924	-4.60982	4.03e-06	2.77e-05
Lamc2	ENSMUSG00000026479	protein_coding	16782	589.52	-0.266461	0.109789	-2.42704	0.0152227	0.0385551
Skiv2l	ENSMUSG00000040356	protein_coding	108077	2397.75	-0.266838	0.0574239	-4.64681	3.37e-06	2.37e-05
Amfr	ENSMUSG00000031751	protein_coding	23802	5043.05	-0.267349	0.0363948	-7.34581	2.05e-13	5.4e-12
Dnajb12	ENSMUSG00000020109	protein_coding	56709	2453.97	-0.26735	0.0503144	-5.31358	1.07e-07	1.05e-06
Rab28	ENSMUSG00000029128	protein_coding	100972	1707.8	-0.268087	0.0617531	-4.34127	1.42e-05	8.57e-05
Casp9	ENSMUSG00000028914	protein_coding	12371	784.635	-0.268182	0.0730271	-3.67236	0.00024032	0.00106053
NA	NA	NA	NA	78814.1	-0.268266	0.0678443	-3.95415	7.68e-05	0.00038397
Flnb	ENSMUSG00000025278	protein_coding	286940	14331.1	-0.268763	0.0781559	-3.4388	0.0005843	0.00230743
Mapkapk5	ENSMUSG00000029454	protein_coding	17165	1900.68	-0.268791	0.0548643	-4.8992	9.62e-07	7.61e-06
Spryd3	ENSMUSG00000036966	protein_coding	223918	4024.84	-0.269065	0.0543287	-4.95254	7.33e-07	5.94e-06
Flna	ENSMUSG00000031328	protein_coding	NA	32630.1	-0.26912	0.0810791	-3.31923	0.00090266	0.00338909
Bag2	ENSMUSG00000042215	protein_coding	213539	2071.91	-0.269408	0.052396	-5.14177	2.72e-07	2.42e-06
Eaf1	ENSMUSG00000021890	protein_coding	74427	7376.33	-0.269787	0.0758118	-3.55864	0.00037279	0.0015558
Rnf166	ENSMUSG00000014470	protein_coding	68718	1466.49	-0.26995	0.0555738	-4.85751	1.19e-06	9.2e-06
Dgkd	ENSMUSG00000070738	protein_coding	227333	3758.16	-0.271297	0.0663926	-4.08625	4.38e-05	0.00023486
Tcerg1	ENSMUSG00000024498	protein_coding	56070	3066.19	-0.271977	0.0590794	-4.60358	4.15e-06	2.85e-05
Wdr41	ENSMUSG00000042015	protein_coding	218460	940.488	-0.272445	0.0641968	-4.2439	2.2e-05	0.00012639
NA	NA	NA	NA	7256.1	-0.272467	0.0968599	-2.813	0.00490818	0.014595
Gse1	ENSMUSG00000031822	protein_coding	382034	2367.16	-0.273141	0.0633545	-4.31132	1.62e-05	9.65e-05
Ttc7b	ENSMUSG00000033530	protein_coding	104718	1632.58	-0.273405	0.0585909	-4.66634	3.07e-06	2.18e-05
Tmed8	ENSMUSG00000034111	protein_coding	382620	1098.48	-0.273445	0.108406	-2.52241	0.0116553	0.0307519
Psmd4	ENSMUSG00000005625	protein_coding	19185	6616.22	-0.273726	0.0853572	-3.20683	0.00134204	0.00477024
Nlgn2	ENSMUSG00000051790	protein_coding	NA	2889.64	-0.274016	0.0740966	-3.69808	0.00021723	0.00096832
Asb3	ENSMUSG00000020305	protein_coding	65257	634.145	-0.274117	0.0881985	-3.10795	0.00188391	0.00640754
Serac1	ENSMUSG00000015659	protein_coding	321007	1338.63	-0.274133	0.0595879	-4.60049	4.21e-06	2.88e-05
Pomt2	ENSMUSG00000034126	protein_coding	217734	930.783	-0.274148	0.0713924	-3.84001	0.00012303	0.00058473
Vwa8	ENSMUSG00000058997	protein_coding	219189	1584.25	-0.274195	0.0574522	-4.77258	1.82e-06	1.35e-05
Arhgef1	ENSMUSG00000040940	protein_coding	16801	3040.96	-0.274714	0.0667756	-4.114	3.89e-05	0.00021119
Ost4	ENSMUSG00000038803	protein_coding	NA	2185.09	-0.274777	0.116775	-2.35306	0.0186198	0.0457059
Rhbdd2	ENSMUSG00000039917	protein_coding	215160	808.606	-0.274813	0.101811	-2.69925	0.00694961	0.019771
Rad18	ENSMUSG00000030254	protein_coding	58186	1128.95	-0.274838	0.0912067	-3.01335	0.00258383	0.0084007
Prpf19	ENSMUSG00000024735	protein_coding	28000	4936.87	-0.274927	0.0578558	-4.75193	2.01e-06	1.48e-05
Ctdp1	ENSMUSG00000033323	protein_coding	NA	1971.17	-0.274964	0.0569297	-4.82988	1.37e-06	1.04e-05
Pdxk	ENSMUSG00000032788	protein_coding	NA	2997.48	-0.275032	0.0510709	-5.38529	7.23e-08	7.36e-07
Fut10	ENSMUSG00000046152	protein_coding	171167	658.192	-0.275412	0.0898348	-3.06576	0.00217118	0.00723939
Ier3	ENSMUSG00000003541	protein_coding	15937	10263.9	-0.275819	0.108194	-2.54931	0.0107938	0.0287349
Hsdl1	ENSMUSG00000034189	protein_coding	NA	1346.85	-0.275996	0.0580415	-4.75514	1.98e-06	1.46e-05
Dcun1d5	ENSMUSG00000032002	protein_coding	76863	1534.28	-0.276158	0.0675828	-4.08621	4.38e-05	0.00023486
Nrbp1	ENSMUSG00000029148	protein_coding	192292	2583.33	-0.276181	0.0589706	-4.68338	2.82e-06	2.02e-05
Flii	ENSMUSG00000002812	protein_coding	14248	4510.84	-0.277802	0.0561156	-4.95053	7.4e-07	5.99e-06
Dpp3	ENSMUSG00000063904	protein_coding	75221	3590.67	-0.278315	0.0483187	-5.75997	8.41e-09	1.03e-07
C2cd3	ENSMUSG00000047248	protein_coding	277939	736.304	-0.27848	0.0910254	-3.05936	0.00221807	0.00737406
Ifitm5	ENSMUSG00000025489	protein_coding	73835	14484.6	-0.278984	0.0883134	-3.15902	0.00158302	0.00551759
Atxn7l2	ENSMUSG00000048997	protein_coding	NA	609.084	-0.279201	0.0916983	-3.04477	0.00232855	0.00768886
Erlec1	ENSMUSG00000020311	protein_coding	66753	1152.06	-0.27925	0.06368	-4.3852	1.16e-05	7.17e-05
Fbxl14	ENSMUSG00000030019	protein_coding	101358	1743.42	-0.280058	0.0575798	-4.86382	1.15e-06	8.96e-06
Hdhd5	ENSMUSG00000058979	protein_coding	NA	736.666	-0.280474	0.0819751	-3.42145	0.00062288	0.00244068
Slc5a6	ENSMUSG00000006641	protein_coding	NA	413.574	-0.280506	0.104027	-2.69648	0.00700775	0.0199083
Itpripl2	ENSMUSG00000095115	protein_coding	NA	19015.4	-0.280702	0.0797282	-3.52074	0.00043034	0.00175997
Trio	ENSMUSG00000022263	protein_coding	223435	5498.39	-0.280825	0.119884	-2.34247	0.0191563	0.046787
Fh1	ENSMUSG00000026526	protein_coding	14194	1044.43	-0.281231	0.078045	-3.60344	0.00031403	0.00134048
Gpsm1	ENSMUSG00000026930	protein_coding	NA	1335.48	-0.282013	0.080086	-3.52137	0.00042932	0.00175738
NA	NA	NA	NA	1121.71	-0.282017	0.119961	-2.35091	0.0187274	0.0459186
Gorab	ENSMUSG00000040124	protein_coding	NA	774.901	-0.282385	0.0810027	-3.48612	0.00049008	0.00197665
Wdr59	ENSMUSG00000031959	protein_coding	319481	853.07	-0.282749	0.0864799	-3.26954	0.00107724	0.00394335
Arl6	ENSMUSG00000022722	protein_coding	56297	306.188	-0.282916	0.117706	-2.40357	0.0162357	0.0407452
Trit1	ENSMUSG00000028653	protein_coding	66966	593.953	-0.283361	0.0984009	-2.87966	0.00398109	0.0122311
Arfip2	ENSMUSG00000030881	protein_coding	76932	1531.14	-0.283922	0.0557036	-5.09701	3.45e-07	3e-06
Ccdc117	ENSMUSG00000020482	protein_coding	NA	3002.56	-0.284359	0.0880981	-3.22776	0.00124765	0.00448483
Rps19-ps6	ENSMUSG00000096942	processed_pseudogene	NA	1326.77	-0.28473	0.122564	-2.32312	0.0201726	0.048894
NA	NA	NA	NA	1326.77	-0.28473	0.122564	-2.32312	0.0201726	0.048894
Endov	ENSMUSG00000039850	protein_coding	NA	1208.12	-0.284767	0.0607528	-4.68731	2.77e-06	1.99e-05
4731419I09Rik	ENSMUSG00000097004	antisense	NA	1000.27	-0.285175	0.0871946	-3.27056	0.00107336	0.00393232
Nubp1	ENSMUSG00000022503	protein_coding	NA	1478.68	-0.285533	0.0668764	-4.26955	1.96e-05	0.00011426
Mad2l2	ENSMUSG00000029003	protein_coding	71890	488.367	-0.286219	0.0987341	-2.89889	0.00374486	0.0116175
Plpp5	ENSMUSG00000031570	protein_coding	NA	914.532	-0.286244	0.0862809	-3.31758	0.00090802	0.00340569
Nelfcd	ENSMUSG00000016253	protein_coding	NA	1591.46	-0.286409	0.0708314	-4.04353	5.27e-05	0.00027616
Zfp125	ENSMUSG00000069755	transcribed_unprocessed_pseudogene	NA	521.244	-0.286433	0.0840292	-3.40873	0.00065266	0.00254418
Hook2	ENSMUSG00000052566	protein_coding	170833	1632.6	-0.286688	0.0879682	-3.25899	0.00111809	0.00408053
Cyth1	ENSMUSG00000017132	protein_coding	19157	1072.23	-0.287342	0.0547845	-5.24494	1.56e-07	1.47e-06
Stk40	ENSMUSG00000042608	protein_coding	74178	834.309	-0.28767	0.0764372	-3.76348	0.00016756	0.00076844
Cers6	ENSMUSG00000027035	protein_coding	241447	1424.04	-0.287857	0.0774781	-3.71533	0.00020294	0.0009113
Nsd2	ENSMUSG00000057406	protein_coding	107823	2508.41	-0.288221	0.0746291	-3.86204	0.00011244	0.00053968
Irf2bp2	ENSMUSG00000051495	protein_coding	270110	8381.86	-0.28865	0.0751431	-3.84133	0.00012237	0.00058187
Zfp346	ENSMUSG00000021481	protein_coding	26919	941.589	-0.288705	0.0676112	-4.27007	1.95e-05	0.00011407
Lipe	ENSMUSG00000003123	protein_coding	16890	238.634	-0.289613	0.110482	-2.62137	0.00875781	0.0240882
Gid4	ENSMUSG00000018415	protein_coding	66771	1869.91	-0.289766	0.0521886	-5.55228	2.82e-08	3.11e-07
Dcp1b	ENSMUSG00000041477	protein_coding	319618	270.784	-0.290092	0.102527	-2.82942	0.0046632	0.0139673
Strip1	ENSMUSG00000014601	protein_coding	NA	2177.64	-0.290424	0.0601163	-4.83103	1.36e-06	1.04e-05
Riok3	ENSMUSG00000024404	protein_coding	66878	3409.4	-0.29058	0.0582022	-4.99259	5.96e-07	4.91e-06
Cacnb1	ENSMUSG00000020882	protein_coding	NA	544.88	-0.290587	0.100262	-2.89827	0.00375232	0.0116347
Mettl17	ENSMUSG00000004561	protein_coding	52535	973.976	-0.29098	0.076885	-3.78462	0.00015395	0.00071375
Tbc1d2	ENSMUSG00000039813	protein_coding	381605	715.287	-0.291368	0.113446	-2.56835	0.0102183	0.0274233
Klhdc10	ENSMUSG00000029775	protein_coding	76788	4825.13	-0.291634	0.0636323	-4.58311	4.58e-06	3.11e-05
Hspb8	ENSMUSG00000041548	protein_coding	NA	9646.28	-0.291723	0.0837732	-3.4823	0.00049713	0.00200243
Atg101	ENSMUSG00000037204	protein_coding	NA	1675.65	-0.292599	0.0863574	-3.38823	0.00070344	0.00272631
Cyld	ENSMUSG00000036712	protein_coding	74256	2168.36	-0.292627	0.0806758	-3.62719	0.00028652	0.00123793
Eme1	ENSMUSG00000039055	protein_coding	268465	5208.98	-0.292684	0.0677033	-4.32304	1.54e-05	9.21e-05
Chka	ENSMUSG00000024843	protein_coding	12660	6873.18	-0.29292	0.074341	-3.94022	8.14e-05	0.0004044
Gm6863	ENSMUSG00000043483	processed_pseudogene	NA	3546.79	-0.292941	0.0845393	-3.46515	0.00052994	0.00211607
Cdca4	ENSMUSG00000047832	protein_coding	NA	1381.53	-0.293133	0.0653904	-4.48281	7.37e-06	4.74e-05
Psmd13	ENSMUSG00000025487	protein_coding	23997	4025.43	-0.293606	0.0818871	-3.5855	0.00033644	0.00142196
Pitpnb	ENSMUSG00000050017	protein_coding	56305	2677.11	-0.293705	0.051142	-5.74294	9.3e-09	1.13e-07
Srp14	ENSMUSG00000009549	protein_coding	20813	2047.79	-0.293706	0.0890767	-3.29722	0.00097646	0.00362789
Adssl1	ENSMUSG00000011148	protein_coding	NA	2094.68	-0.293799	0.0925179	-3.17559	0.0014953	0.00524713
Akt2	ENSMUSG00000004056	protein_coding	11652	3043.83	-0.29446	0.0564382	-5.21739	1.81e-07	1.67e-06
Mrpl19	ENSMUSG00000030045	protein_coding	NA	1240.54	-0.294478	0.0676247	-4.35459	1.33e-05	8.11e-05
Tfrc	ENSMUSG00000022797	protein_coding	22042	2502.89	-0.294735	0.100738	-2.92575	0.00343624	0.0107911
Stx1a	ENSMUSG00000007207	protein_coding	20907	936.276	-0.294821	0.0660616	-4.46282	8.09e-06	5.15e-05
Micu2	ENSMUSG00000021973	protein_coding	68514	964.628	-0.295155	0.0791882	-3.72726	0.00019357	0.00087423
Sec14l2	ENSMUSG00000003585	protein_coding	67815	175.752	-0.295326	0.120227	-2.4564	0.0140338	0.036062
Arv1	ENSMUSG00000031982	protein_coding	NA	1260.81	-0.295465	0.0945629	-3.12453	0.00178086	0.0061063
Zfp523	ENSMUSG00000024220	protein_coding	224656	701.749	-0.296305	0.109806	-2.69843	0.00696665	0.0198104
Pheta1	ENSMUSG00000044134	protein_coding	NA	395.872	-0.296372	0.121723	-2.43481	0.0148997	0.0378692
Plekhh3	ENSMUSG00000035172	protein_coding	NA	1201.1	-0.296557	0.082252	-3.60548	0.00031158	0.00133098
Rexo1	ENSMUSG00000047417	protein_coding	66932	2540.07	-0.296598	0.0508992	-5.82715	5.64e-09	7.14e-08
Mpdu1	ENSMUSG00000018761	protein_coding	24070	642.046	-0.296754	0.118754	-2.4989	0.0124581	0.0326045
Eftud2	ENSMUSG00000020929	protein_coding	20624	4682.88	-0.29719	0.0418192	-7.10654	1.19e-12	2.81e-11
Ddb1	ENSMUSG00000024740	protein_coding	13194	19326	-0.297541	0.034329	-8.66734	4.42e-18	2.16e-16
Naa16	ENSMUSG00000022020	protein_coding	66897	662.379	-0.297803	0.0788777	-3.7755	0.00015969	0.0007366
Golga1	ENSMUSG00000026754	protein_coding	76899	740.687	-0.297884	0.0718465	-4.14612	3.38e-05	0.00018607
Tap2	ENSMUSG00000024339	protein_coding	21355	783.848	-0.298031	0.076538	-3.8939	9.86e-05	0.00048056
Uqcrh	ENSMUSG00000063882	protein_coding	66576	3502.63	-0.298502	0.100973	-2.95625	0.00311406	0.00992714
Zzef1	ENSMUSG00000055670	protein_coding	195018	1116.8	-0.29908	0.0711659	-4.20257	2.64e-05	0.00014903
Ccz1	ENSMUSG00000029617	protein_coding	231874	1592.17	-0.300035	0.0516358	-5.81059	6.23e-09	7.82e-08
Rcc1l	ENSMUSG00000061979	protein_coding	94254	942.123	-0.300198	0.0922021	-3.25587	0.00113044	0.00411818
Zfp317	ENSMUSG00000057551	protein_coding	244713	1310.21	-0.300468	0.0827073	-3.63291	0.00028025	0.00121458
Zfp637	ENSMUSG00000059689	protein_coding	232337	900.476	-0.300738	0.0743086	-4.04715	5.18e-05	0.00027263
Rnps1	ENSMUSG00000034681	protein_coding	19826	4663.89	-0.30125	0.046372	-6.49637	8.23e-11	1.43e-09
Anxa7	ENSMUSG00000021814	protein_coding	11750	7359.22	-0.301647	0.051371	-5.87194	4.31e-09	5.59e-08
Igsf8	ENSMUSG00000038034	protein_coding	140559	622.868	-0.301706	0.125428	-2.40541	0.0161541	0.0405575
Aldh18a1	ENSMUSG00000025007	protein_coding	56454	8209.7	-0.301866	0.0892725	-3.3814	0.00072117	0.0027822
Rps19	ENSMUSG00000040952	protein_coding	20085	34760.6	-0.301967	0.109861	-2.74863	0.00598455	0.0173493
Tspan14	ENSMUSG00000037824	protein_coding	52588	1381.2	-0.301973	0.0568057	-5.31589	1.06e-07	1.04e-06
Rab35	ENSMUSG00000029518	protein_coding	NA	2067.92	-0.302577	0.0468756	-6.45489	1.08e-10	1.84e-09
Dnaja1	ENSMUSG00000028410	protein_coding	15502	27968.7	-0.303168	0.112535	-2.69398	0.00706041	0.0200391
Eef1a1-ps1	ENSMUSG00000117822	processed_pseudogene	NA	1108.58	-0.303195	0.0791909	-3.82866	0.00012884	0.00060841
Mettl8	ENSMUSG00000041975	protein_coding	228019	292.672	-0.303498	0.110416	-2.74868	0.00598355	0.0173492
Macroh2a1	ENSMUSG00000015937	protein_coding	26914	3790.87	-0.303636	0.0459029	-6.61476	3.72e-11	6.99e-10
Haus7	ENSMUSG00000031371	protein_coding	NA	631.02	-0.303938	0.124793	-2.43553	0.0148699	0.037819
Lsm14b	ENSMUSG00000039108	protein_coding	NA	4046.54	-0.304187	0.0448888	-6.77646	1.23e-11	2.49e-10
Cct8	ENSMUSG00000025613	protein_coding	12469	8737.01	-0.304365	0.0465363	-6.54036	6.14e-11	1.09e-09
Gm50203	ENSMUSG00000118243	antisense	NA	988.281	-0.304464	0.0985777	-3.08857	0.00201125	0.00677714
Orai1	ENSMUSG00000049686	protein_coding	109305	406.502	-0.304617	0.107026	-2.8462	0.00442447	0.013367
Bbip1	ENSMUSG00000084957	protein_coding	100503572	811.208	-0.304764	0.0721072	-4.22655	2.37e-05	0.0001356
Lsm8	ENSMUSG00000044155	protein_coding	76522	1970.53	-0.30477	0.0558068	-5.46115	4.73e-08	4.97e-07
Micu3	ENSMUSG00000039478	protein_coding	78506	329.806	-0.305352	0.100376	-3.04208	0.00234952	0.00775001
Fkbp14	ENSMUSG00000038074	protein_coding	NA	868.474	-0.305415	0.0904339	-3.37721	0.00073224	0.00281924
Faf1	ENSMUSG00000010517	protein_coding	14084	3472.4	-0.305717	0.0734612	-4.16162	3.16e-05	0.000175
Sec24b	ENSMUSG00000001052	protein_coding	99683	4474.29	-0.305767	0.0641318	-4.76779	1.86e-06	1.38e-05
Cc2d1b	ENSMUSG00000028582	protein_coding	319965	2365.43	-0.305823	0.0712991	-4.2893	1.79e-05	0.00010565
Tbc1d13	ENSMUSG00000039678	protein_coding	70296	1268.32	-0.305863	0.0648803	-4.71426	2.43e-06	1.76e-05
Pkmyt1	ENSMUSG00000023908	protein_coding	268930	839.028	-0.305901	0.0895462	-3.41613	0.00063518	0.00248134
Ran	ENSMUSG00000029430	protein_coding	NA	9734.17	-0.30638	0.0614169	-4.98853	6.08e-07	5.01e-06
Arhgef25	ENSMUSG00000019467	protein_coding	NA	5178.89	-0.306665	0.0573756	-5.34487	9.05e-08	8.98e-07
Cnih1	ENSMUSG00000015759	protein_coding	12793	3899.45	-0.308109	0.0710309	-4.33768	1.44e-05	8.7e-05
Arfgap2	ENSMUSG00000027255	protein_coding	77038	2052.11	-0.308131	0.0585068	-5.26659	1.39e-07	1.32e-06
Ric8b	ENSMUSG00000035620	protein_coding	237422	847.291	-0.308329	0.068072	-4.52946	5.91e-06	3.9e-05
Fam210b	ENSMUSG00000027495	protein_coding	NA	2198.12	-0.309386	0.0581801	-5.31773	1.05e-07	1.03e-06
Gnb1l	ENSMUSG00000000884	protein_coding	13972	380.61	-0.309453	0.10513	-2.94353	0.00324498	0.010283
Nr2f1	ENSMUSG00000069171	protein_coding	13865	1224.91	-0.309764	0.105581	-2.93391	0.00334721	0.0105514
Crtc3	ENSMUSG00000030527	protein_coding	70461	1876.53	-0.309856	0.0497633	-6.22661	4.77e-10	7.3e-09
Gm17139	ENSMUSG00000092006	antisense	NA	319.989	-0.309941	0.108386	-2.85961	0.00424167	0.0128826
Atp6v0d1	ENSMUSG00000013160	protein_coding	11972	2223.81	-0.310047	0.0850709	-3.64457	0.00026784	0.00116752
Rai14	ENSMUSG00000022246	protein_coding	75646	16192.6	-0.310325	0.0669335	-4.63631	3.55e-06	2.47e-05
Plpbp	ENSMUSG00000031485	protein_coding	114863	2255.39	-0.311292	0.0618342	-5.0343	4.8e-07	4.04e-06
Mir29b-1	ENSMUSG00000065604	miRNA	NA	785.329	-0.311362	0.115539	-2.69486	0.0070418	0.0199925
Tubgcp2	ENSMUSG00000025474	protein_coding	74237	1265.27	-0.311547	0.0685679	-4.54363	5.53e-06	3.67e-05
NA	NA	NA	NA	607.27	-0.312931	0.121511	-2.57533	0.0100144	0.0269517
Gramd1a	ENSMUSG00000001248	protein_coding	52857	5581.57	-0.313162	0.0421119	-7.43644	1.03e-13	2.86e-12
Aqp1	ENSMUSG00000004655	protein_coding	NA	5030.43	-0.313221	0.101387	-3.08934	0.00200599	0.00676192
Brf1	ENSMUSG00000011158	protein_coding	72308	3070.06	-0.313298	0.052973	-5.91429	3.33e-09	4.42e-08
Tmem259	ENSMUSG00000013858	protein_coding	NA	5390.49	-0.313612	0.109454	-2.86523	0.00416701	0.012701
Dpy19l3	ENSMUSG00000043671	protein_coding	233115	1149.01	-0.314188	0.088125	-3.56525	0.00036351	0.00152131
Zfp706	ENSMUSG00000062397	protein_coding	68036	5064.22	-0.314498	0.0505944	-6.21606	5.1e-10	7.77e-09
Cd3eap	ENSMUSG00000047649	protein_coding	NA	1269.01	-0.31458	0.0921345	-3.41435	0.00063934	0.00249545
Pspc1	ENSMUSG00000021938	protein_coding	66645	1134.52	-0.315133	0.0783493	-4.02215	5.77e-05	0.00029875
Kiz	ENSMUSG00000074749	protein_coding	228730	1448.54	-0.315184	0.074533	-4.22878	2.35e-05	0.00013438
Noa1	ENSMUSG00000036285	protein_coding	56412	908.569	-0.315373	0.0698058	-4.51787	6.25e-06	4.11e-05
Gorasp2	ENSMUSG00000014959	protein_coding	70231	4947.22	-0.315395	0.0628586	-5.01753	5.23e-07	4.37e-06
Stip1	ENSMUSG00000024966	protein_coding	20867	20715.7	-0.315624	0.0658303	-4.7945	1.63e-06	1.22e-05
NA	NA	NA	NA	723.781	-0.31622	0.0922898	-3.42638	0.00061169	0.002402
Gpr182	ENSMUSG00000058396	protein_coding	NA	290.82	-0.316344	0.0941152	-3.36124	0.00077592	0.00296979
Rps6ka1	ENSMUSG00000003644	protein_coding	20111	297.22	-0.316387	0.094154	-3.36031	0.00077855	0.00297795
Tbrg4	ENSMUSG00000000384	protein_coding	NA	2378.92	-0.316512	0.0605631	-5.22615	1.73e-07	1.61e-06
Umps	ENSMUSG00000022814	protein_coding	22247	1988.63	-0.316846	0.0601049	-5.27155	1.35e-07	1.29e-06
Pex2	ENSMUSG00000040374	protein_coding	19302	1156.54	-0.317399	0.0610954	-5.19514	2.05e-07	1.86e-06
Xpo7	ENSMUSG00000022100	protein_coding	65246	2339.53	-0.317515	0.0772378	-4.11088	3.94e-05	0.00021365
Csnk1g2	ENSMUSG00000003345	protein_coding	103236	3487.54	-0.317567	0.0885176	-3.58762	0.00033371	0.00141223
Sh3bp2	ENSMUSG00000054520	protein_coding	24055	1034.55	-0.31811	0.0662753	-4.79982	1.59e-06	1.19e-05
Gdi1	ENSMUSG00000015291	protein_coding	NA	6295.44	-0.318143	0.0452023	-7.03821	1.95e-12	4.45e-11
Wdr4	ENSMUSG00000024037	protein_coding	57773	1397.88	-0.318161	0.0755829	-4.20942	2.56e-05	0.00014492
Slc25a47	ENSMUSG00000048856	protein_coding	104910	242.745	-0.318212	0.117714	-2.70327	0.00686611	0.0195611
Lsm12	ENSMUSG00000020922	protein_coding	268490	2471.11	-0.318727	0.067486	-4.72286	2.33e-06	1.7e-05
Nmt2	ENSMUSG00000026643	protein_coding	18108	1990.03	-0.318817	0.06628	-4.81016	1.51e-06	1.14e-05
Cpsf1	ENSMUSG00000034022	protein_coding	NA	4900.63	-0.318863	0.0365685	-8.71962	2.79e-18	1.38e-16
Gdnf	ENSMUSG00000022144	protein_coding	14573	4720.37	-0.319045	0.0720103	-4.43054	9.4e-06	5.93e-05
Gak	ENSMUSG00000062234	protein_coding	231580	4026.23	-0.319493	0.0457352	-6.98571	2.83e-12	6.31e-11
Traf3	ENSMUSG00000021277	protein_coding	22031	2239.8	-0.320007	0.0555188	-5.76394	8.22e-09	1.01e-07
Hira	ENSMUSG00000022702	protein_coding	15260	2143.18	-0.320012	0.0540496	-5.92071	3.21e-09	4.26e-08
Naca	ENSMUSG00000061315	protein_coding	17938	28961.8	-0.320052	0.0759958	-4.21145	2.54e-05	0.00014377
Agtpbp1	ENSMUSG00000021557	protein_coding	67269	846.943	-0.320208	0.0879136	-3.64231	0.00027021	0.00117613
Osgepl1	ENSMUSG00000026096	protein_coding	72085	932.889	-0.32077	0.0737764	-4.34786	1.37e-05	8.34e-05
Ddhd1	ENSMUSG00000037697	protein_coding	114874	1141.57	-0.320851	0.07412	-4.32881	1.5e-05	9.01e-05
Baiap2l1	ENSMUSG00000038859	protein_coding	66898	706.132	-0.320929	0.0667903	-4.80502	1.55e-06	1.16e-05
Triobp	ENSMUSG00000033088	protein_coding	110253	6705.62	-0.321543	0.0684594	-4.69685	2.64e-06	1.9e-05
Polb	ENSMUSG00000031536	protein_coding	18970	688.102	-0.321604	0.0802144	-4.00931	6.09e-05	0.00031279
Sap30l	ENSMUSG00000020519	protein_coding	NA	1718.55	-0.321879	0.0602894	-5.33889	9.35e-08	9.24e-07
Pabpn1	ENSMUSG00000022194	protein_coding	54196	2989.16	-0.321895	0.0483542	-6.65701	2.79e-11	5.33e-10
Rps15a-ps3	ENSMUSG00000084314	processed_pseudogene	NA	163.92	-0.321925	0.136281	-2.36222	0.0181661	0.044739
Baiap2	ENSMUSG00000025372	protein_coding	108100	4387.78	-0.321928	0.080074	-4.02038	5.81e-05	0.00030057
Arpc2	ENSMUSG00000006304	protein_coding	76709	7116.96	-0.3225	0.0532271	-6.05894	1.37e-09	1.95e-08
Qtrt1	ENSMUSG00000002825	protein_coding	60507	5842.46	-0.322509	0.0442469	-7.28884	3.13e-13	8.01e-12
Fam220a	ENSMUSG00000083012	protein_coding	NA	1116.4	-0.322694	0.068268	-4.72688	2.28e-06	1.67e-05
Pttg1ip	ENSMUSG00000009291	protein_coding	108705	17971.8	-0.322733	0.0396434	-8.1409	3.92e-16	1.49e-14
E2f4	ENSMUSG00000014859	protein_coding	104394	2660.11	-0.323502	0.0461862	-7.00431	2.48e-12	5.57e-11
Mypop	ENSMUSG00000048481	protein_coding	232934	501.485	-0.323937	0.130096	-2.48997	0.0127753	0.0333002
Tubgcp4	ENSMUSG00000027263	protein_coding	51885	4018.33	-0.32394	0.0614814	-5.26892	1.37e-07	1.3e-06
Fam98c	ENSMUSG00000030590	protein_coding	NA	3531.57	-0.324519	0.051431	-6.3098	2.79e-10	4.42e-09
Higd2a	ENSMUSG00000025868	protein_coding	NA	947.677	-0.324745	0.0951978	-3.41127	0.00064661	0.00252168
Cry1	ENSMUSG00000020038	protein_coding	12952	578.604	-0.324803	0.103031	-3.15248	0.00161889	0.00562534
2700081O15Rik	ENSMUSG00000053080	protein_coding	108899	4572.97	-0.325199	0.0588232	-5.52841	3.23e-08	3.52e-07
Kcnh2	ENSMUSG00000038319	protein_coding	16511	682.728	-0.325272	0.0776901	-4.18679	2.83e-05	0.00015867
Gnb5	ENSMUSG00000032192	protein_coding	14697	792.931	-0.325319	0.0898531	-3.62057	0.00029395	0.00126462
Prmt3	ENSMUSG00000030505	protein_coding	71974	2605.39	-0.325423	0.057661	-5.64373	1.66e-08	1.92e-07
Paf1	ENSMUSG00000003437	protein_coding	NA	1804.19	-0.32593	0.0819311	-3.9781	6.95e-05	0.00035154
Ahsa2	ENSMUSG00000020288	protein_coding	NA	5615.89	-0.326097	0.0617967	-5.27692	1.31e-07	1.25e-06
Tacc2	ENSMUSG00000030852	protein_coding	57752	3205.59	-0.326434	0.0465685	-7.00977	2.39e-12	5.38e-11
Wdsub1	ENSMUSG00000026988	protein_coding	72137	466.531	-0.326986	0.0945893	-3.4569	0.00054643	0.00217161
Diras1	ENSMUSG00000043670	protein_coding	NA	1246.51	-0.327009	0.0603924	-5.41474	6.14e-08	6.33e-07
Pakap	ENSMUSG00000038729	protein_coding	677884	25595.4	-0.327132	0.100336	-3.26035	0.00111274	0.00406346
Elac1	ENSMUSG00000036941	protein_coding	NA	514.31	-0.327177	0.0813165	-4.0235	5.73e-05	0.00029755
Trmt6	ENSMUSG00000037376	protein_coding	66926	1153.65	-0.327206	0.0695434	-4.70506	2.54e-06	1.83e-05
Eef1a1	ENSMUSG00000037742	protein_coding	13627	316080	-0.327222	0.0511321	-6.39954	1.56e-10	2.55e-09
4732487G21Rik	ENSMUSG00000097488	lincRNA	NA	474.884	-0.32752	0.0825607	-3.96703	7.28e-05	0.00036631
Dut	ENSMUSG00000027203	protein_coding	NA	2043.94	-0.327656	0.0716277	-4.57444	4.78e-06	3.23e-05
Map2k7	ENSMUSG00000002948	protein_coding	26400	2386.37	-0.328159	0.0420954	-7.79561	6.41e-15	2.07e-13
Mapre3	ENSMUSG00000029166	protein_coding	100732	1428.15	-0.328351	0.060267	-5.44828	5.09e-08	5.32e-07
Bckdk	ENSMUSG00000030802	protein_coding	NA	1974.6	-0.32841	0.0767213	-4.28055	1.86e-05	0.00010946
Pgls	ENSMUSG00000031807	protein_coding	NA	5061.89	-0.328579	0.0710062	-4.62746	3.7e-06	2.57e-05
Atp6ap1	ENSMUSG00000019087	protein_coding	NA	6840.39	-0.328947	0.056812	-5.79011	7.03e-09	8.73e-08
Mrps5	ENSMUSG00000027374	protein_coding	77721	1403.19	-0.329195	0.0631716	-5.21113	1.88e-07	1.72e-06
Gm3756	ENSMUSG00000091639	processed_pseudogene	NA	271.563	-0.329699	0.116078	-2.84032	0.00450679	0.0135674
Sdc4	ENSMUSG00000017009	protein_coding	20971	4746.53	-0.329984	0.1267	-2.60444	0.00920235	0.0251354
Tuba1b	ENSMUSG00000023004	protein_coding	22143	17931.7	-0.330188	0.0922784	-3.57817	0.00034601	0.00145679
Gm50037	ENSMUSG00000117603	antisense	NA	559.449	-0.330977	0.132328	-2.50118	0.012378	0.0324135
Uspl1	ENSMUSG00000041264	protein_coding	231915	2112.5	-0.331146	0.0830309	-3.98823	6.66e-05	0.00033876
Gcfc2	ENSMUSG00000035125	protein_coding	330361	1052.19	-0.331533	0.0651255	-5.09068	3.57e-07	3.08e-06
Snap29	ENSMUSG00000022765	protein_coding	67474	1140.93	-0.332061	0.0874103	-3.79888	0.00014535	0.0006784
Ptov1	ENSMUSG00000038502	protein_coding	NA	3931.36	-0.332103	0.0994079	-3.34081	0.00083533	0.00316051
Tmem268	ENSMUSG00000045917	protein_coding	NA	797.346	-0.332358	0.0770057	-4.31602	1.59e-05	9.46e-05
4930404N11Rik	ENSMUSG00000020234	protein_coding	NA	518.056	-0.332402	0.0823128	-4.03828	5.38e-05	0.00028135
Fitm2	ENSMUSG00000048486	protein_coding	NA	1316.34	-0.332732	0.0631262	-5.27089	1.36e-07	1.29e-06
Bbs4	ENSMUSG00000025235	protein_coding	NA	301.723	-0.332884	0.0984523	-3.38117	0.00072177	0.00278344
Gm6552	ENSMUSG00000117458	processed_pseudogene	NA	460.711	-0.333596	0.104581	-3.18982	0.00142361	0.00502474
B4galt1	ENSMUSG00000028413	protein_coding	14595	9094.69	-0.334037	0.0459613	-7.26779	3.65e-13	9.25e-12
Pinx1	ENSMUSG00000021958	protein_coding	72400	446.765	-0.335394	0.117058	-2.86519	0.00416763	0.012701
Nipsnap2	ENSMUSG00000029432	protein_coding	14467	1027.49	-0.336003	0.0715818	-4.69396	2.68e-06	1.93e-05
Gigyf1	ENSMUSG00000029714	protein_coding	NA	5105.2	-0.336425	0.0421705	-7.97774	1.49e-15	5.22e-14
Upf3a	ENSMUSG00000038398	protein_coding	67031	953.662	-0.336579	0.0707196	-4.75935	1.94e-06	1.44e-05
Rrp1	ENSMUSG00000061032	protein_coding	18114	7434.73	-0.337244	0.0712199	-4.73525	2.19e-06	1.6e-05
Dnal4	ENSMUSG00000022420	protein_coding	NA	1474.9	-0.33741	0.0884622	-3.81417	0.00013664	0.00064188
Ube2q1	ENSMUSG00000042572	protein_coding	70093	3519.73	-0.33863	0.0447897	-7.56045	4.02e-14	1.17e-12
Ighmbp2	ENSMUSG00000024831	protein_coding	20589	1012.72	-0.3387	0.0743966	-4.55262	5.3e-06	3.53e-05
Asic1	ENSMUSG00000023017	protein_coding	11419	3090.24	-0.33894	0.0605004	-5.60228	2.12e-08	2.39e-07
Pyroxd1	ENSMUSG00000041671	protein_coding	NA	793.989	-0.338947	0.0723899	-4.68224	2.84e-06	2.03e-05
Ddhd2	ENSMUSG00000061313	protein_coding	72108	1330.01	-0.339046	0.0702321	-4.82751	1.38e-06	1.05e-05
Cacybp	ENSMUSG00000014226	protein_coding	12301	5647.13	-0.33914	0.0879831	-3.85461	0.00011592	0.00055457
Ssr4	ENSMUSG00000002014	protein_coding	NA	3440.2	-0.33923	0.0946256	-3.58497	0.00033711	0.00142396
Uggt2	ENSMUSG00000042104	protein_coding	66435	514.595	-0.339252	0.0939399	-3.61137	0.00030458	0.00130478
Ddah2	ENSMUSG00000007039	protein_coding	NA	7046.49	-0.339292	0.0743793	-4.56165	5.08e-06	3.4e-05
Sqor	ENSMUSG00000005803	protein_coding	59010	1903.98	-0.339834	0.0609861	-5.57232	2.51e-08	2.8e-07
Mamdc4	ENSMUSG00000026941	protein_coding	NA	961.591	-0.340073	0.0961903	-3.53542	0.00040713	0.00167638
Arhgap24	ENSMUSG00000057315	protein_coding	231532	1110.93	-0.340205	0.0708459	-4.80204	1.57e-06	1.18e-05
Stac3	ENSMUSG00000040287	protein_coding	NA	152.086	-0.341268	0.129352	-2.63828	0.00833273	0.0231115
Phtf1os	ENSMUSG00000089998	antisense	NA	1006.09	-0.341328	0.0970402	-3.51739	0.00043582	0.00177877
Cln5	ENSMUSG00000022125	protein_coding	NA	586.89	-0.342035	0.0847089	-4.03776	5.4e-05	0.00028189
Zkscan6	ENSMUSG00000018347	protein_coding	52712	344.887	-0.342127	0.110431	-3.09812	0.00194751	0.00659422
Nrp2	ENSMUSG00000025969	protein_coding	18187	20809.7	-0.342696	0.0847629	-4.043	5.28e-05	0.00027659
Tarbp2	ENSMUSG00000023051	protein_coding	NA	1437.89	-0.343336	0.073005	-4.7029	2.56e-06	1.85e-05
Pdlim1	ENSMUSG00000055044	protein_coding	54132	3864.81	-0.343533	0.0821179	-4.18341	2.87e-05	0.00016089
Col8a1	ENSMUSG00000068196	protein_coding	12837	4771.52	-0.343775	0.10673	-3.22097	0.00127757	0.00457425
NA	NA	NA	NA	2477.46	-0.344332	0.115043	-2.99309	0.00276173	0.00891676
Adam15	ENSMUSG00000028041	protein_coding	NA	3135.63	-0.345158	0.0769846	-4.48347	7.34e-06	4.73e-05
Ubxn4	ENSMUSG00000026353	protein_coding	67812	5714.79	-0.345267	0.0473903	-7.28561	3.2e-13	8.18e-12
Fabp5	ENSMUSG00000027533	protein_coding	16592	468.252	-0.345485	0.131338	-2.6305	0.00852591	0.0235429
Ttc7	ENSMUSG00000036918	protein_coding	225049	2817.65	-0.346068	0.0529631	-6.53414	6.4e-11	1.13e-09
Eml5	ENSMUSG00000051166	protein_coding	319670	1473.07	-0.346308	0.0779335	-4.44364	8.85e-06	5.6e-05
Fancf	ENSMUSG00000092118	protein_coding	NA	262.927	-0.346403	0.119922	-2.88858	0.00386981	0.0119419
Aste1	ENSMUSG00000032567	protein_coding	NA	378.667	-0.347082	0.0899085	-3.86039	0.0001132	0.00054289
Selenoh	ENSMUSG00000076437	protein_coding	NA	612.656	-0.34758	0.111798	-3.10899	0.0018773	0.00638748
Rsu1	ENSMUSG00000026727	protein_coding	20163	1118.3	-0.347593	0.0728057	-4.77425	1.8e-06	1.34e-05
Snf8	ENSMUSG00000006058	protein_coding	27681	2177.81	-0.347795	0.0916671	-3.79412	0.00014817	0.00069068
Jmjd6	ENSMUSG00000056962	protein_coding	107817	4009.8	-0.347836	0.123081	-2.82608	0.00471222	0.0140908
Man2b2	ENSMUSG00000029119	protein_coding	17160	1220.06	-0.348075	0.0878807	-3.96077	7.47e-05	0.00037472
NA	NA	NA	NA	224.143	-0.348126	0.140236	-2.48243	0.0130491	0.0339115
Mettl22	ENSMUSG00000039345	protein_coding	NA	262.24	-0.34845	0.125393	-2.77887	0.0054549	0.016003
Ocel1	ENSMUSG00000002396	protein_coding	NA	895.398	-0.349659	0.0832347	-4.20088	2.66e-05	0.00014994
Rbm19	ENSMUSG00000029594	protein_coding	74111	1460.62	-0.350231	0.069403	-5.04634	4.5e-07	3.81e-06
Gm13456	ENSMUSG00000082536	processed_pseudogene	NA	5806.13	-0.350636	0.0571221	-6.13835	8.34e-10	1.23e-08
Cdk17	ENSMUSG00000020015	protein_coding	237459	2685.54	-0.350641	0.0686748	-5.10581	3.29e-07	2.88e-06
Trmt1	ENSMUSG00000001909	protein_coding	NA	4537.72	-0.351204	0.0648883	-5.41244	6.22e-08	6.4e-07
Ate1	ENSMUSG00000030850	protein_coding	11907	2299.37	-0.351279	0.0924215	-3.80084	0.00014421	0.00067393
Ctsb	ENSMUSG00000021939	protein_coding	13030	26036.7	-0.351381	0.0689014	-5.09977	3.4e-07	2.96e-06
Morn4	ENSMUSG00000049670	protein_coding	226123	545.4	-0.351618	0.0849881	-4.13727	3.51e-05	0.00019281
Tmem79	ENSMUSG00000001420	protein_coding	71913	224.91	-0.351648	0.11526	-3.0509	0.00228153	0.00755871
Tle1	ENSMUSG00000008305	protein_coding	21885	5053.83	-0.352035	0.0661329	-5.32314	1.02e-07	1e-06
Sap30bp	ENSMUSG00000020755	protein_coding	57230	2174.67	-0.35233	0.0526204	-6.6957	2.15e-11	4.18e-10
Supv3l1	ENSMUSG00000020079	protein_coding	338359	1326.15	-0.352435	0.0711786	-4.95141	7.37e-07	5.96e-06
Ccdc71	ENSMUSG00000049305	protein_coding	NA	1057.59	-0.354661	0.0791783	-4.47927	7.49e-06	4.8e-05
Avpi1	ENSMUSG00000018821	protein_coding	NA	4668.18	-0.355983	0.100201	-3.55268	0.00038133	0.00158563
Aph1a	ENSMUSG00000015750	protein_coding	NA	1832.44	-0.356137	0.0712163	-5.00078	5.71e-07	4.73e-06
Ehmt2	ENSMUSG00000013787	protein_coding	110147	6501.32	-0.356162	0.0649111	-5.48692	4.09e-08	4.36e-07
Dhx29	ENSMUSG00000042426	protein_coding	218629	1768.64	-0.356538	0.0485556	-7.34287	2.09e-13	5.51e-12
Phf6	ENSMUSG00000025626	protein_coding	NA	1304.23	-0.356741	0.101362	-3.51949	0.00043239	0.00176634
Snai1	ENSMUSG00000042821	protein_coding	NA	1058.28	-0.35682	0.101937	-3.50041	0.00046454	0.00188288
Thoc3	ENSMUSG00000025872	protein_coding	73666	1021.39	-0.356884	0.0711261	-5.01762	5.23e-07	4.37e-06
Rab5if	ENSMUSG00000027637	protein_coding	67388	3757.84	-0.356978	0.0859064	-4.15543	3.25e-05	0.00017958
Ddr1	ENSMUSG00000003534	protein_coding	12305	2846.36	-0.357382	0.0696891	-5.12823	2.92e-07	2.58e-06
Bag3	ENSMUSG00000030847	protein_coding	29810	10041.1	-0.357779	0.112421	-3.18251	0.00146007	0.00513842
Cnot10	ENSMUSG00000056167	protein_coding	78893	1885.55	-0.357996	0.0515317	-6.94711	3.73e-12	8.16e-11
Nfkb1	ENSMUSG00000028163	protein_coding	18033	2843.91	-0.358191	0.0608863	-5.88294	4.03e-09	5.26e-08
Coro1c	ENSMUSG00000004530	protein_coding	23790	4568.78	-0.358231	0.0604042	-5.93056	3.02e-09	4.02e-08
Fgd1	ENSMUSG00000025265	protein_coding	NA	1047.96	-0.358436	0.0648887	-5.52386	3.32e-08	3.6e-07
Acaa1a	ENSMUSG00000036138	protein_coding	113868	1710.98	-0.358751	0.0854258	-4.19956	2.67e-05	0.00015063
Wdr73	ENSMUSG00000025722	protein_coding	71968	812.534	-0.358918	0.0827673	-4.33647	1.45e-05	8.74e-05
BC004004	ENSMUSG00000052712	protein_coding	80748	1225.13	-0.358974	0.105709	-3.39588	0.00068409	0.00265584
Naf1	ENSMUSG00000014907	protein_coding	234344	987.181	-0.359076	0.06535	-5.49466	3.91e-08	4.19e-07
Chchd2	ENSMUSG00000070493	protein_coding	NA	4609.08	-0.359228	0.109335	-3.28557	0.00101776	0.00376054
Ammecr1	ENSMUSG00000042225	protein_coding	NA	610.996	-0.359291	0.0957028	-3.75423	0.00017387	0.00079316
Cdr2l	ENSMUSG00000050910	protein_coding	237988	12278.4	-0.35932	0.0653912	-5.49493	3.91e-08	4.19e-07
Cct7	ENSMUSG00000030007	protein_coding	12468	15355.9	-0.359577	0.0651289	-5.52101	3.37e-08	3.65e-07
NA	NA	NA	NA	216306	-0.360417	0.07347	-4.90564	9.31e-07	7.39e-06
Gm48952	ENSMUSG00000115332	lincRNA	NA	112.656	-0.36074	0.150323	-2.39976	0.0164056	0.0410638
Itgb1	ENSMUSG00000025809	protein_coding	16412	13666.6	-0.360884	0.0612147	-5.89537	3.74e-09	4.9e-08
Pnkp	ENSMUSG00000002963	protein_coding	NA	2298.05	-0.360998	0.0930138	-3.88112	0.00010398	0.00050382
Snx3	ENSMUSG00000019804	protein_coding	54198	4832.87	-0.361055	0.0716761	-5.03731	4.72e-07	3.98e-06
Bcl2l1	ENSMUSG00000007659	protein_coding	12048	5897.46	-0.361129	0.0666015	-5.42223	5.89e-08	6.08e-07
Lpcat1	ENSMUSG00000021608	protein_coding	210992	1669.46	-0.36149	0.0787426	-4.59077	4.42e-06	3.01e-05
Snx6	ENSMUSG00000005656	protein_coding	72183	1931.17	-0.361799	0.0563049	-6.4257	1.31e-10	2.19e-09
Mapkap1	ENSMUSG00000038696	protein_coding	227743	1214.99	-0.361909	0.0596027	-6.07203	1.26e-09	1.81e-08
NA	NA	NA	NA	10320.9	-0.362006	0.10172	-3.55884	0.0003725	0.00155496
Kmt5a	ENSMUSG00000049327	protein_coding	67956	6207.48	-0.362405	0.032911	-11.0117	3.36e-28	4.61e-26
Gm47071	ENSMUSG00000114493	antisense	NA	1506.25	-0.362464	0.0632406	-5.73151	9.95e-09	1.2e-07
Ugcg	ENSMUSG00000028381	protein_coding	22234	12566.5	-0.363531	0.0568047	-6.39966	1.56e-10	2.55e-09
Cmc1	ENSMUSG00000039163	protein_coding	67899	355.543	-0.363606	0.140056	-2.59614	0.00942778	0.0256151
Tmem186	ENSMUSG00000043140	protein_coding	NA	364.818	-0.363666	0.0957026	-3.79996	0.00014472	0.0006758
Ano8	ENSMUSG00000034863	protein_coding	NA	4093.61	-0.363932	0.0615522	-5.91257	3.37e-09	4.46e-08
Zfyve27	ENSMUSG00000018820	protein_coding	319740	2631.91	-0.364036	0.047714	-7.62955	2.36e-14	7.02e-13
Eif2b5	ENSMUSG00000003235	protein_coding	224045	2599.49	-0.364058	0.0614548	-5.924	3.14e-09	4.18e-08
Psmb5	ENSMUSG00000022193	protein_coding	NA	1791.45	-0.364297	0.0975833	-3.73319	0.00018907	0.00085581
Mrps35	ENSMUSG00000040112	protein_coding	NA	405.232	-0.364986	0.0962946	-3.79031	0.00015046	0.00070041
Tmem161a	ENSMUSG00000002342	protein_coding	NA	1535.08	-0.365545	0.0803326	-4.55039	5.35e-06	3.57e-05
Gm15601	ENSMUSG00000085913	antisense	NA	374.576	-0.365908	0.0921087	-3.97257	7.11e-05	0.00035861
Rogdi	ENSMUSG00000022540	protein_coding	NA	498.742	-0.36603	0.0965202	-3.79226	0.00014928	0.00069531
Sec31a	ENSMUSG00000035325	protein_coding	69162	10200.1	-0.366463	0.0634012	-5.78007	7.47e-09	9.22e-08
Pip4k2a	ENSMUSG00000026737	protein_coding	18718	665.127	-0.366532	0.0823235	-4.45234	8.49e-06	5.39e-05
Sipa1l2	ENSMUSG00000001995	protein_coding	244668	938.157	-0.367458	0.0933417	-3.9367	8.26e-05	0.00040993
Josd2	ENSMUSG00000038695	protein_coding	NA	1226.02	-0.367696	0.0979346	-3.7545	0.00017369	0.00079252
Gm10335	ENSMUSG00000071532	processed_pseudogene	NA	377.604	-0.368049	0.130501	-2.82027	0.00479833	0.0143059
Src	ENSMUSG00000027646	protein_coding	20779	3510.31	-0.368182	0.044689	-8.23875	1.74e-16	6.95e-15
Arid5b	ENSMUSG00000019947	protein_coding	71371	3905.08	-0.368209	0.094069	-3.91425	9.07e-05	0.00044587
[truncated: 693 more rows]

## Sheet: Sup.Table 2 A DkkMovsNT DEgene
mgi_symbol	ensembl_gene_id	gene_biotype	entrezgene_id	baseMean.x	log2FoldChange.x	lfcSE.x	stat.x	pvalue.x	padj.x
Gm29992	ENSMUSG00000117365	lincRNA	NA	64.162	19.3172	3.35022	5.76596	8.11927e-09	8.21745e-06
Fcnaos	ENSMUSG00000052403	antisense	NA	507.012	8.97893	1.4076	6.37891	1.78353e-10	3.10477e-07
Pnpla1	ENSMUSG00000043286	protein_coding	433091	214.497	6.56582	1.86064	3.52879	0.000417469	0.0163825
4930505G20Rik	ENSMUSG00000093551	processed_transcript	NA	537.435	6.15903	1.56048	3.94689	7.91744e-05	0.00634007
Gm4847	ENSMUSG00000051081	protein_coding	226604	160.086	5.83066	1.18996	4.89988	9.58956e-07	0.000350704
Gm12236	ENSMUSG00000086460	antisense	NA	146.721	4.91456	1.2391	3.96623	7.30183e-05	0.00607602
Gm47732	ENSMUSG00000114573	lincRNA	NA	38.0476	4.83314	1.42244	3.39779	0.000679327	0.0218348
5430425K12Rik	ENSMUSG00000114554	lincRNA	NA	811.883	4.49812	0.953066	4.71963	2.36276e-06	0.000680975
Olfr675	ENSMUSG00000096773	protein_coding	258147	41.7842	4.44981	1.00508	4.42732	9.54115e-06	0.00175203
Pla2g10	ENSMUSG00000022683	protein_coding	26565	90.8364	4.33209	1.15595	3.74764	0.000178503	0.00998523
Gm44767	ENSMUSG00000108749	antisense	NA	484.224	4.31816	1.42431	3.03175	0.00243137	0.0458861
4930471D02Rik	ENSMUSG00000097689	lincRNA	NA	163.743	4.22535	1.34826	3.13393	0.00172483	0.0381426
Gm15902	ENSMUSG00000086012	sense_intronic	NA	674.231	4.18786	1.36617	3.0654	0.00217381	0.0430999
Sult2a5	ENSMUSG00000078799	protein_coding	434264	142.949	4.08832	1.05845	3.86256	0.000112207	0.00763005
Fam189a2	ENSMUSG00000071604	protein_coding	381217	91.2002	4.02703	1.28699	3.12904	0.00175381	0.0384098
Gm38155	ENSMUSG00000104245	antisense	NA	552.923	4.0011	1.08728	3.67992	0.000233311	0.0115121
Gm48558	ENSMUSG00000113629	lincRNA	NA	316.086	3.93538	1.29783	3.03228	0.00242715	0.045866
Gm25956	ENSMUSG00000092856	miRNA	NA	191.517	3.86658	1.00972	3.82936	0.000128477	0.00833284
Islr	ENSMUSG00000037206	protein_coding	26968	363.983	3.50123	0.907933	3.85626	0.000115133	0.00776691
Gm49127	ENSMUSG00000115460	antisense	NA	207.608	3.49798	1.07617	3.25041	0.00115238	0.0297908
Naip2	ENSMUSG00000078945	protein_coding	17948	1778.09	3.43884	1.06507	3.22876	0.00124327	0.031312
Rhbdl3	ENSMUSG00000017692	protein_coding	246104	889.986	3.3333	0.845355	3.94308	8.04415e-05	0.00636147
Gm35722	ENSMUSG00000112104	lincRNA	NA	318.876	3.27376	0.816951	4.00729	6.14188e-05	0.00551123
4933405E24Rik	ENSMUSG00000086209	lincRNA	NA	673.265	3.21918	1.0365	3.10582	0.00189755	0.0401075
Ankk1	ENSMUSG00000032257	protein_coding	244859	140.624	3.17221	1.03183	3.07436	0.00210957	0.0424842
Gm13773	ENSMUSG00000086253	processed_transcript	NA	311.728	3.11932	0.985062	3.16662	0.00154219	0.0356303
Mrgprb1	ENSMUSG00000070547	protein_coding	233231	311.79	3.09256	0.811691	3.81002	0.000138954	0.00872858
Tnk1	ENSMUSG00000001583	protein_coding	83813	523.663	3.08765	1.02455	3.01366	0.00258118	0.0476298
Slc6a5	ENSMUSG00000039728	protein_coding	104245	678.188	3.06059	0.856125	3.57494	0.000350314	0.0148748
4933440M02Rik	ENSMUSG00000045928	lincRNA	NA	455.336	3.01999	0.725792	4.16096	3.16913e-05	0.00388509
Gm37967	ENSMUSG00000102571	TEC	NA	1624.93	2.7894	0.921066	3.02845	0.00245814	0.0461486
Lrrc72	ENSMUSG00000020545	protein_coding	71156	648.239	2.72363	0.806737	3.37611	0.000735192	0.0227779
1700016B01Rik	ENSMUSG00000104538	lincRNA	NA	199.82	2.65597	0.866862	3.06388	0.00218484	0.0432262
Gm33195	ENSMUSG00000113780	lincRNA	NA	677.077	2.63389	0.536825	4.90642	9.27556e-07	0.000345019
Gm33373	ENSMUSG00000117375	antisense	NA	832.779	2.60979	0.777828	3.35523	0.000792991	0.0237068
Vmn1r87	ENSMUSG00000070815	protein_coding	171261	254.928	2.50144	0.735158	3.40259	0.000667508	0.0215985
Gm50080	ENSMUSG00000117390	TEC	NA	629.568	2.49881	0.787497	3.1731	0.00150818	0.0351662
1700061N14Rik	ENSMUSG00000110464	lincRNA	NA	964.025	2.27413	0.723668	3.14251	0.00167507	0.0373772
Gm10415	ENSMUSG00000107623	lincRNA	NA	2569.16	2.2173	0.73775	3.00549	0.0026515	0.0484033
Gm50050	ENSMUSG00000117654	lincRNA	NA	2953.62	2.19948	0.654526	3.36042	0.000778244	0.0234631
Rtn1	ENSMUSG00000021087	protein_coding	104001	6368.7	2.19249	0.716762	3.05888	0.00222169	0.0435336
1700013D24Rik	ENSMUSG00000079346	lincRNA	NA	1445.82	2.09915	0.650074	3.22909	0.00124185	0.0313039
4930554C24Rik	ENSMUSG00000099724	lincRNA	NA	1750.49	2.08908	0.658006	3.17486	0.00149908	0.035094
1700010N08Rik	ENSMUSG00000101855	transcribed_processed_pseudogene	NA	1669.56	2.07116	0.654994	3.16211	0.00156632	0.0359716
Gm49121	ENSMUSG00000115221	unitary_pseudogene	NA	709.419	2.06609	0.68584	3.01249	0.00259113	0.0476811
Enthd1	ENSMUSG00000050439	protein_coding	383075	3415.82	2.05326	0.683506	3.00402	0.0026644	0.0485573
Gm32004	ENSMUSG00000114534	processed_transcript	NA	2253.96	1.83986	0.60667	3.03271	0.00242366	0.0458431
4930440I19Rik	ENSMUSG00000085431	lincRNA	NA	2082.43	1.70233	0.548656	3.10273	0.00191745	0.0402557
C730002L08Rik	ENSMUSG00000114469	processed_transcript	NA	7103.2	1.61643	0.528889	3.05628	0.00224103	0.0437352
Tmem63c	ENSMUSG00000034145	protein_coding	217733	1572.31	1.56832	0.481377	3.25799	0.00112204	0.0293387
Gm38343	ENSMUSG00000102450	TEC	NA	2087.98	1.54781	0.429174	3.6065	0.00031036	0.0138817
Gm27199	ENSMUSG00000098649	antisense	NA	14037.6	1.51742	0.421857	3.59701	0.000321902	0.0141507
4930556G01Rik	ENSMUSG00000085522	lincRNA	NA	7239.1	1.44584	0.396322	3.64815	0.000264131	0.0125217
Gm31452	ENSMUSG00000114311	lincRNA	NA	1667.28	1.41305	0.440589	3.20719	0.00134036	0.0328449
Gm29865	ENSMUSG00000105331	lincRNA	NA	9941.41	1.30017	0.362801	3.58369	0.000338768	0.0145989
Ly6c2	ENSMUSG00000022584	protein_coding	100041546	14532.7	-1.66439	0.534444	-3.11425	0.00184411	0.039341
Cyct	ENSMUSG00000056436	protein_coding	13067	3736.23	-1.69051	0.519373	-3.25491	0.00113427	0.0295242
4930452B06Rik	ENSMUSG00000021747	protein_coding	74430	3536.41	-1.74555	0.528592	-3.30227	0.00095907	0.0265498
Mipol1	ENSMUSG00000047022	protein_coding	73490	5388.27	-1.7742	0.559522	-3.17092	0.00151955	0.0353191
Jakmip1	ENSMUSG00000063646	protein_coding	76071	6326.22	-1.90631	0.512017	-3.72313	0.000196767	0.0105129
Gm48126	ENSMUSG00000114757	unitary_pseudogene	NA	2917.34	-1.93119	0.578269	-3.33961	0.000838974	0.0246208
Utrn	ENSMUSG00000019820	protein_coding	22288	17157.3	-1.93567	0.619417	-3.12499	0.00177812	0.0387073
Rere	ENSMUSG00000039852	protein_coding	68703	5712.33	-1.96784	0.592567	-3.32088	0.000897342	0.0256754
4930447J18Rik	ENSMUSG00000115609	lincRNA	NA	3969.7	-1.97946	0.625581	-3.16419	0.00155514	0.0358095
Srcap	ENSMUSG00000053877	protein_coding	100043597	6371.24	-1.9891	0.610809	-3.25649	0.00112797	0.0294654
Klra7	ENSMUSG00000067599	protein_coding	16638	11978.7	-1.9904	0.661566	-3.00863	0.00262431	0.0480884
Fam172a	ENSMUSG00000064138	protein_coding	68675	13356.9	-2.00833	0.597528	-3.36107	0.00077641	0.0234323
Prkdc	ENSMUSG00000022672	protein_coding	19090	4929.6	-2.03666	0.582163	-3.49844	0.000467994	0.0174227
Farp1	ENSMUSG00000025555	protein_coding	223254	2550.48	-2.04772	0.669633	-3.05797	0.00222843	0.0436263
Asah2	ENSMUSG00000024887	protein_coding	54447	11057.5	-2.07422	0.676999	-3.06384	0.00218515	0.0432262
Gm31698	ENSMUSG00000111669	lincRNA	NA	4696.49	-2.09642	0.651154	-3.21955	0.00128391	0.0320205
Gm44196	ENSMUSG00000107614	lincRNA	NA	8572.21	-2.11749	0.593666	-3.5668	0.000361364	0.0151948
Foxp1	ENSMUSG00000030067	protein_coding	108655	27761	-2.12452	0.583546	-3.64071	0.000271889	0.0127232
D5Ertd579e	ENSMUSG00000029190	protein_coding	320661	7040.7	-2.13714	0.680294	-3.14149	0.0016809	0.0374758
Mical2	ENSMUSG00000038244	protein_coding	320878	2550.13	-2.14488	0.716553	-2.99333	0.0027595	0.0492995
Mical2	ENSMUSG00000038244	protein_coding	100504195	2550.13	-2.14488	0.716553	-2.99333	0.0027595	0.0492995
Zfp935	ENSMUSG00000055228	protein_coding	NA	3461.06	-2.15787	0.655603	-3.29143	0.000996807	0.0271981
Adprh	ENSMUSG00000002844	protein_coding	11544	188926	-2.1822	0.633254	-3.44601	0.00056892	0.0194956
Srebf2	ENSMUSG00000022463	protein_coding	20788	17141.2	-2.18658	0.726612	-3.00928	0.00261868	0.0480054
Tmem135	ENSMUSG00000039428	protein_coding	72759	7436.44	-2.18661	0.714196	-3.06164	0.00220126	0.043318
Gpr137c	ENSMUSG00000049092	protein_coding	70713	793.469	-2.18699	0.591172	-3.69941	0.0002161	0.0109739
Stat1	ENSMUSG00000026104	protein_coding	20846	9410	-2.18897	0.698309	-3.13468	0.00172044	0.0381281
Ogfod1	ENSMUSG00000033009	protein_coding	270086	1498.77	-2.19035	0.66122	-3.31259	0.00092437	0.0260717
Nbea	ENSMUSG00000027799	protein_coding	26422	7017.82	-2.1905	0.685281	-3.1965	0.00139105	0.0337638
Slamf1	ENSMUSG00000015316	protein_coding	27218	1685.51	-2.19318	0.707457	-3.10009	0.0019346	0.040436
Gm32772	ENSMUSG00000108782	lincRNA	NA	650.07	-2.19894	0.683596	-3.21673	0.00129661	0.0321346
A26c3	ENSMUSG00000027157	protein_coding	67575	1151.03	-2.19979	0.706006	-3.11582	0.00183433	0.0393175
Nyap2	ENSMUSG00000054976	protein_coding	241134	14169.3	-2.20073	0.691713	-3.18156	0.00146483	0.0346842
Zfp407	ENSMUSG00000048410	protein_coding	240476	6642.59	-2.20192	0.700005	-3.14558	0.00165756	0.0371284
Smyd1	ENSMUSG00000055027	protein_coding	12180	5612.01	-2.20502	0.690125	-3.1951	0.00139783	0.0338339
Gm49197	ENSMUSG00000115184	TEC	NA	653.509	-2.20628	0.716713	-3.07833	0.00208167	0.0421232
Bnipl	ENSMUSG00000028115	protein_coding	171388	4622.29	-2.21929	0.567103	-3.91337	9.1016e-05	0.00673631
Dnah11	ENSMUSG00000018581	protein_coding	13411	4253.02	-2.22874	0.705513	-3.15904	0.0015829	0.0361237
Faf1	ENSMUSG00000010517	protein_coding	14084	16065.5	-2.22959	0.652086	-3.41916	0.00062814	0.0206626
Ica1l	ENSMUSG00000026018	protein_coding	70375	4981.75	-2.23225	0.746389	-2.99073	0.00278309	0.0495582
4930595L18Rik	ENSMUSG00000107929	lincRNA	NA	3870.52	-2.23867	0.600221	-3.72975	0.00019167	0.0103364
Fggy	ENSMUSG00000028573	protein_coding	75578	9939.33	-2.25437	0.607765	-3.70928	0.000207847	0.0107941
Lhfpl2	ENSMUSG00000045312	protein_coding	218454	2360.29	-2.26841	0.698536	-3.24737	0.00116476	0.0299069
Kansl1	ENSMUSG00000018412	protein_coding	76719	9418.56	-2.30228	0.671595	-3.42807	0.000607879	0.0203031
A930006I01Rik	ENSMUSG00000087278	lincRNA	NA	1285.97	-2.30669	0.763459	-3.02136	0.0025164	0.0467608
Ap2b1	ENSMUSG00000035152	protein_coding	71770	11712.6	-2.33376	0.741919	-3.14557	0.00165764	0.0371284
Gm29823	ENSMUSG00000116800	lincRNA	NA	1092.26	-2.33937	0.742189	-3.15199	0.00162162	0.0365972
Babam2	ENSMUSG00000052139	protein_coding	107976	8402.53	-2.40635	0.80452	-2.99104	0.00278032	0.0495494
Aldh1a1	ENSMUSG00000053279	protein_coding	11668	3152.58	-2.41884	0.567598	-4.26154	2.03024e-05	0.00296497
Ttll4	ENSMUSG00000033257	protein_coding	67534	4112.21	-2.42586	0.763411	-3.17766	0.0014847	0.0349214
Gm38604	ENSMUSG00000114401	antisense	NA	4767.14	-2.42619	0.804489	-3.01581	0.00256291	0.0473793
Abr	ENSMUSG00000017631	protein_coding	109934	6891.32	-2.43494	0.808416	-3.01199	0.00259543	0.0477401
Gm48236	ENSMUSG00000113741	lincRNA	NA	1058.14	-2.43531	0.800832	-3.04097	0.00235816	0.0451306
A1cf	ENSMUSG00000052595	protein_coding	69865	1567.57	-2.43661	0.766406	-3.17927	0.00147648	0.034832
Mpp7	ENSMUSG00000057440	protein_coding	75739	5993.28	-2.44494	0.744078	-3.28587	0.00101669	0.0275163
Nfatc3	ENSMUSG00000031902	protein_coding	18021	5694.45	-2.46313	0.807464	-3.05045	0.002285	0.0442758
Drg1	ENSMUSG00000020457	protein_coding	13494	3698.53	-2.4704	0.812946	-3.03883	0.002375	0.0452935
Gm47343	ENSMUSG00000112732	lincRNA	NA	2180.73	-2.47051	0.7691	-3.2122	0.00131721	0.0324164
Ppp3ca	ENSMUSG00000028161	protein_coding	19055	9391.03	-2.47205	0.718736	-3.43944	0.000582914	0.019742
Grin2a	ENSMUSG00000059003	protein_coding	14811	14498.8	-2.49742	0.73535	-3.39624	0.000683193	0.0218944
Ipo8	ENSMUSG00000040029	protein_coding	320727	4662.29	-2.49916	0.767577	-3.25591	0.0011303	0.0295085
Dnmt3a	ENSMUSG00000020661	protein_coding	13435	5733.94	-2.51017	0.766851	-3.27334	0.00106283	0.0283196
Strbp	ENSMUSG00000026915	protein_coding	20744	5764.14	-2.51994	0.762728	-3.30386	0.000953644	0.0265023
Cog5	ENSMUSG00000035933	protein_coding	238123	9580.78	-2.52345	0.713683	-3.53582	0.000406512	0.0161342
Itpr1	ENSMUSG00000030102	protein_coding	16438	7696.71	-2.53192	0.847482	-2.98757	0.00281201	0.0499097
Gm36723	ENSMUSG00000113669	lincRNA	NA	18670.9	-2.54286	0.814971	-3.12018	0.0018074	0.039075
Hivep1	ENSMUSG00000021366	protein_coding	110521	3953.9	-2.54396	0.83121	-3.06055	0.00220931	0.0433994
Nos1	ENSMUSG00000029361	protein_coding	18125	4869.11	-2.59998	0.686655	-3.78644	0.000152819	0.00917338
Htr1f	ENSMUSG00000050783	protein_coding	15557	3281.74	-2.60498	0.867497	-3.00287	0.00267444	0.0487199
Cul5	ENSMUSG00000032030	protein_coding	75717	3085.65	-2.61061	0.707327	-3.69081	0.000223539	0.0111907
Cyp20a1	ENSMUSG00000049439	protein_coding	77951	3797.25	-2.61089	0.752801	-3.46824	0.000523885	0.0185815
Zfp800	ENSMUSG00000039841	protein_coding	627049	3015.31	-2.61499	0.863954	-3.02677	0.00247178	0.0463272
Gm15398	ENSMUSG00000085456	lincRNA	NA	1735.71	-2.61722	0.776316	-3.37133	0.000748052	0.0229748
Gm4792	ENSMUSG00000053420	protein_coding	NA	8145.58	-2.63183	0.852857	-3.0859	0.00202938	0.0416343
Tbc1d4	ENSMUSG00000033083	protein_coding	210789	3586.02	-2.64548	0.767892	-3.44512	0.000570814	0.0195297
Taf12	ENSMUSG00000028899	protein_coding	66464	3935.91	-2.65813	0.852121	-3.11943	0.00181198	0.0391057
Csad	ENSMUSG00000023044	protein_coding	246277	1141.93	-2.66365	0.840042	-3.17086	0.00151989	0.0353191
Erich3	ENSMUSG00000078161	protein_coding	209601	1409.04	-2.6902	0.880059	-3.05684	0.00223683	0.0436728
Scarb2	ENSMUSG00000029426	protein_coding	12492	3671.67	-2.72678	0.861409	-3.16549	0.00154825	0.0357262
Rabgap1	ENSMUSG00000035437	protein_coding	227800	5871.42	-2.73063	0.774859	-3.52404	0.000425026	0.0165448
Magohb	ENSMUSG00000030188	protein_coding	66441	3163.07	-2.7314	0.821685	-3.32414	0.000886907	0.0255786
Dglucy	ENSMUSG00000021185	protein_coding	217830	4335.58	-2.73922	0.868964	-3.15228	0.00162	0.0365968
Dnajb6	ENSMUSG00000029131	protein_coding	23950	1987.9	-2.75953	0.700322	-3.94037	8.13546e-05	0.00640245
Cd80	ENSMUSG00000075122	protein_coding	12519	2080.23	-2.7768	0.848343	-3.2732	0.00106336	0.0283196
1110002L01Rik	ENSMUSG00000071456	antisense	NA	1083.13	-2.77687	0.851605	-3.26075	0.00111117	0.0291842
Plek	ENSMUSG00000020120	protein_coding	56193	8675.99	-2.77708	0.907076	-3.06158	0.00220173	0.043318
Pla2g4f	ENSMUSG00000046971	protein_coding	271844	452.363	-2.78062	0.895723	-3.10433	0.00190713	0.0402379
Mnat1	ENSMUSG00000021103	protein_coding	17420	2043.05	-2.78274	0.849739	-3.27482	0.00105731	0.0282801
Ube2h	ENSMUSG00000039159	protein_coding	22214	3032.42	-2.78438	0.871382	-3.19537	0.00139654	0.033826
Chd2	ENSMUSG00000078671	protein_coding	244059	16648.1	-2.7872	0.827194	-3.36946	0.000753145	0.0230823
Mtf1	ENSMUSG00000028890	protein_coding	17764	2035.67	-2.79468	0.907868	-3.07828	0.00208196	0.0421232
Braf	ENSMUSG00000002413	protein_coding	109880	8896.99	-2.79864	0.835419	-3.34998	0.000808181	0.0240575
Mapre2	ENSMUSG00000024277	protein_coding	212307	2796.89	-2.82151	0.881127	-3.20216	0.00136404	0.0332565
Chic2	ENSMUSG00000029229	protein_coding	74277	2189.4	-2.82293	0.762322	-3.70307	0.000213007	0.0108759
Ptpn9	ENSMUSG00000032290	protein_coding	56294	2506.95	-2.82383	0.832089	-3.39366	0.000689648	0.0220202
Cfap299	ENSMUSG00000057816	protein_coding	75784	216219	-2.82548	0.806432	-3.50369	0.000458866	0.01726
Sort1	ENSMUSG00000068747	protein_coding	20661	783.139	-2.82761	0.920811	-3.07078	0.00213502	0.0428351
Ralgapa2	ENSMUSG00000037110	protein_coding	241694	8432.21	-2.83117	0.610028	-4.64104	3.46656e-06	0.000914331
Rnf13	ENSMUSG00000036503	protein_coding	24017	6408.43	-2.83213	0.917148	-3.08797	0.00201526	0.0414677
Pcca	ENSMUSG00000041650	protein_coding	110821	15236.3	-2.83263	0.833908	-3.39681	0.000681761	0.0218646
Atp8a1	ENSMUSG00000037685	protein_coding	11980	4262.04	-2.84758	0.95113	-2.99389	0.00275445	0.0492699
Arid1b	ENSMUSG00000069729	protein_coding	239985	4526.79	-2.85374	0.810941	-3.51904	0.000433106	0.0167589
Wdr62	ENSMUSG00000037020	protein_coding	233064	3319.47	-2.86108	0.904998	-3.16143	0.00156999	0.0359873
Gm32338	ENSMUSG00000111587	lincRNA	NA	1951.58	-2.87064	0.957182	-2.99905	0.00270821	0.0488567
Scfd2	ENSMUSG00000062110	protein_coding	212986	2836.11	-2.8791	0.889699	-3.23604	0.00121201	0.030882
Pan3	ENSMUSG00000029647	protein_coding	72587	7541.68	-2.88569	0.896816	-3.21771	0.00129217	0.0320851
Ythdc1	ENSMUSG00000035851	protein_coding	231386	7534.76	-2.90119	0.877355	-3.30674	0.000943877	0.0263486
Oc90	ENSMUSG00000015001	protein_coding	18256	1835.49	-2.91133	0.872638	-3.33624	0.000849185	0.0248197
1700026F02Rik	ENSMUSG00000101854	lincRNA	NA	5326.51	-2.9167	0.859956	-3.39169	0.000694635	0.0221145
Rangap1	ENSMUSG00000022391	protein_coding	19387	2719.33	-2.91808	0.969019	-3.01138	0.00260062	0.0478154
Cmip	ENSMUSG00000034390	protein_coding	74440	8162.55	-2.92423	0.690895	-4.23252	2.31084e-05	0.00320496
Gm48825	ENSMUSG00000113455	lincRNA	NA	1764.47	-2.92519	0.883779	-3.30987	0.000933405	0.0262076
Dbt	ENSMUSG00000000340	protein_coding	13171	1824.68	-2.92792	0.978429	-2.99247	0.00276728	0.0493979
Ptafr	ENSMUSG00000056529	protein_coding	19204	884.837	-2.92915	0.9593	-3.05342	0.00226248	0.0440157
Tsc22d1	ENSMUSG00000022010	protein_coding	21807	1489.35	-2.92933	0.891027	-3.28759	0.00101048	0.0274336
Slc12a6	ENSMUSG00000027130	protein_coding	107723	6717.28	-2.93001	0.789376	-3.7118	0.000205787	0.0107895
Abtb2	ENSMUSG00000032724	protein_coding	99382	1195.56	-2.93637	0.955985	-3.07156	0.00212941	0.0427848
Cnot6l	ENSMUSG00000034724	protein_coding	231464	6160.79	-2.94086	0.803244	-3.66123	0.000251007	0.0121107
Mocos	ENSMUSG00000039616	protein_coding	68591	87680.4	-2.95019	0.952993	-3.09571	0.00196345	0.0407874
Srek1	ENSMUSG00000032621	protein_coding	218543	3520.24	-2.95435	0.83313	-3.54608	0.000391003	0.0157913
Crlf3	ENSMUSG00000017561	protein_coding	54394	2391.61	-2.96496	0.827558	-3.58279	0.00033995	0.0146337
Gm15802	ENSMUSG00000086175	antisense	NA	138174	-2.96735	0.720245	-4.11992	3.78999e-05	0.00422648
Ripk2	ENSMUSG00000041135	protein_coding	192656	2667.6	-2.96831	0.987509	-3.00586	0.00264832	0.0483839
Vwa8	ENSMUSG00000058997	protein_coding	219189	7776.12	-2.97498	0.801583	-3.71139	0.000206126	0.0107895
Gm43507	ENSMUSG00000104894	antisense	NA	1679.35	-2.97515	0.971138	-3.06357	0.00218714	0.043246
Snd1	ENSMUSG00000001424	protein_coding	56463	287641	-2.97574	0.935504	-3.18089	0.00146822	0.0347455
Gm38554	ENSMUSG00000107063	lincRNA	NA	2464.2	-2.98326	0.922828	-3.23274	0.00122611	0.0311295
Scamp1	ENSMUSG00000021687	protein_coding	107767	2205.29	-2.98576	0.959535	-3.11168	0.00186029	0.0395504
1700028K03Rik	ENSMUSG00000089798	protein_coding	76421	6136.12	-2.99682	0.943061	-3.17776	0.00148418	0.0349214
Gm39317	ENSMUSG00000111056	lincRNA	NA	645882	-2.99695	0.829418	-3.61332	0.0003023	0.0136192
Gm11077	ENSMUSG00000079264	protein_coding	NA	3468.42	-3.00167	0.987421	-3.0399	0.00236653	0.0451992
Ghrl	ENSMUSG00000064177	protein_coding	58991	951.155	-3.00397	1.0035	-2.99349	0.0027581	0.0492995
Copg2	ENSMUSG00000025607	protein_coding	54160	6473.93	-3.00653	0.838078	-3.5874	0.000333988	0.0144628
Tpx2	ENSMUSG00000027469	protein_coding	72119	3628.98	-3.01215	0.889638	-3.38582	0.000709661	0.0223638
Fam20c	ENSMUSG00000025854	protein_coding	80752	408.032	-3.01559	1.00066	-3.01359	0.00258177	0.0476298
Ipo11	ENSMUSG00000042590	protein_coding	76582	3464.5	-3.02629	0.694327	-4.35859	1.30903e-05	0.00217438
Rock2	ENSMUSG00000020580	protein_coding	19878	1868.66	-3.03445	1.00724	-3.01265	0.00258976	0.0476811
Gm7631	ENSMUSG00000106185	unprocessed_pseudogene	NA	2461.47	-3.03723	0.873753	-3.47608	0.000508809	0.01824
Oxr1	ENSMUSG00000022307	protein_coding	170719	5349.44	-3.03804	0.812847	-3.73753	0.000185835	0.0101918
Frs2	ENSMUSG00000020170	protein_coding	327826	1190.08	-3.0444	0.958883	-3.17494	0.00149866	0.035094
Dnajb4	ENSMUSG00000028035	protein_coding	67035	11749.4	-3.04675	0.863602	-3.52796	0.000418782	0.0164193
Med1	ENSMUSG00000018160	protein_coding	19014	2651.8	-3.05843	0.951693	-3.21367	0.00131051	0.0323302
Npff	ENSMUSG00000023052	protein_coding	54615	3536.51	-3.07523	0.840375	-3.65935	0.000252853	0.0121459
Igsf11	ENSMUSG00000022790	protein_coding	207683	137214	-3.08588	0.750548	-4.1115	3.93098e-05	0.00434203
Rsrc1	ENSMUSG00000034544	protein_coding	66880	8064.53	-3.09806	0.945466	-3.27675	0.00105008	0.0281723
Tdrd3	ENSMUSG00000022019	protein_coding	219249	1506.29	-3.10239	0.876041	-3.54138	0.000398042	0.0159421
Dus2	ENSMUSG00000031901	protein_coding	66369	3645.65	-3.11405	0.879003	-3.54271	0.000396037	0.0158986
Brdt	ENSMUSG00000029279	protein_coding	114642	904.163	-3.11456	0.973857	-3.19817	0.00138305	0.0335883
Klhl6	ENSMUSG00000043008	protein_coding	239743	3363.57	-3.13223	0.962424	-3.25452	0.00113583	0.0295466
Lcorl	ENSMUSG00000015882	protein_coding	209707	2935.52	-3.14194	0.987346	-3.18221	0.00146157	0.0346447
Cdh23	ENSMUSG00000012819	protein_coding	22295	4986.49	-3.1461	0.899505	-3.49759	0.000469485	0.0174483
Rspry1	ENSMUSG00000050079	protein_coding	67610	5944.4	-3.1521	0.851259	-3.70287	0.00021317	0.0108759
Gm43813	ENSMUSG00000106636	processed_transcript	NA	846.402	-3.15255	1.02036	-3.08963	0.00200406	0.0412762
Oog4	ENSMUSG00000047799	protein_coding	242737	1651.02	-3.1607	0.992861	-3.18343	0.00145543	0.0346099
Morc2a	ENSMUSG00000034543	protein_coding	74522	1718.89	-3.16174	0.760295	-4.15857	3.20246e-05	0.00390395
2510009E07Rik	ENSMUSG00000043391	protein_coding	72190	488.532	-3.16577	0.833982	-3.79597	0.000147068	0.00897368
Cdh1	ENSMUSG00000000303	protein_coding	12550	1422.37	-3.17281	0.829021	-3.82718	0.000129621	0.00836957
Serpinb9f	ENSMUSG00000038327	protein_coding	20709	2409.11	-3.17377	1.02518	-3.09582	0.0019627	0.0407874
Sgo2b	ENSMUSG00000094443	protein_coding	244495	3371.22	-3.17389	0.796042	-3.98709	6.68878e-05	0.00580025
Mmp14	ENSMUSG00000000957	protein_coding	17387	1014.15	-3.1751	0.928125	-3.42098	0.000623962	0.0205563
Mtif2	ENSMUSG00000020459	protein_coding	76784	4800.68	-3.18398	1.03996	-3.06163	0.00220132	0.043318
1700001G01Rik	ENSMUSG00000087170	lincRNA	NA	1394.92	-3.18447	0.966999	-3.29315	0.000990724	0.0271001
Rbfox2	ENSMUSG00000033565	protein_coding	93686	2178.83	-3.19176	1.05046	-3.03845	0.00237797	0.0453304
Zswim6	ENSMUSG00000032846	protein_coding	67263	2062.91	-3.19582	0.919734	-3.47472	0.000511394	0.0183025
Zfp827	ENSMUSG00000071064	protein_coding	622675	5357.34	-3.19618	0.848077	-3.76874	0.000164073	0.00949532
Bahcc1	ENSMUSG00000039741	protein_coding	268515	704.623	-3.20535	1.01011	-3.17327	0.00150732	0.0351662
Elp2	ENSMUSG00000024271	protein_coding	58523	6362.17	-3.21233	0.981291	-3.27358	0.00106195	0.0283196
Epm2a	ENSMUSG00000055493	protein_coding	13853	21113.1	-3.22762	0.911691	-3.54026	0.00039974	0.0159896
Limk2	ENSMUSG00000020451	protein_coding	16886	4796.89	-3.22942	1.06757	-3.02502	0.00248617	0.0464664
Col6a2	ENSMUSG00000020241	protein_coding	12834	4505.61	-3.2401	1.06788	-3.03415	0.00241216	0.0457664
Fbxo11	ENSMUSG00000005371	protein_coding	225055	1566.59	-3.24279	0.829698	-3.90839	9.29129e-05	0.00683593
Dym	ENSMUSG00000035765	protein_coding	69190	2018.98	-3.24389	1.07922	-3.00577	0.00264907	0.0483839
Gm26843	ENSMUSG00000110559	lincRNA	NA	690.755	-3.25401	0.92727	-3.50924	0.000449391	0.0171257
Pkp4	ENSMUSG00000026991	protein_coding	227937	6917.67	-3.25567	0.920286	-3.53767	0.000403678	0.0160946
Opa1	ENSMUSG00000038084	protein_coding	74143	3181.62	-3.27925	0.895748	-3.6609	0.000251327	0.0121127
Dock8	ENSMUSG00000052085	protein_coding	76088	24564.9	-3.28117	0.972617	-3.37354	0.000742072	0.022888
Spata5l1	ENSMUSG00000074876	processed_transcript	NA	7670.12	-3.28532	0.943976	-3.4803	0.000500857	0.0180975
Gm50003	ENSMUSG00000117537	processed_pseudogene	NA	2127.65	-3.28587	1.07477	-3.05727	0.00223365	0.04365
Gm49474	ENSMUSG00000116021	TEC	NA	2109.5	-3.29965	0.874653	-3.77252	0.000161605	0.00940248
Catsper3	ENSMUSG00000021499	protein_coding	76856	544.103	-3.31074	1.08991	-3.03762	0.00238455	0.0454359
Tent2	ENSMUSG00000042167	protein_coding	100715	3764.91	-3.31098	0.865038	-3.82756	0.000129422	0.00836917
Notch2	ENSMUSG00000027878	protein_coding	18129	1452.91	-3.31539	0.967436	-3.42698	0.000610329	0.0203381
Lims1	ENSMUSG00000019920	protein_coding	110829	10454.6	-3.31585	1.08693	-3.05064	0.00228353	0.0442669
Hnrnpll	ENSMUSG00000024095	protein_coding	72692	1400.65	-3.32391	0.948064	-3.50599	0.00045491	0.0172215
Gm48606	ENSMUSG00000113586	lincRNA	NA	17651.2	-3.32563	0.682267	-4.87439	1.09148e-06	0.00039257
Lman1	ENSMUSG00000041891	protein_coding	70361	653.735	-3.3281	1.02474	-3.24774	0.00116324	0.0299019
Tpk1	ENSMUSG00000029735	protein_coding	29807	11508.6	-3.3372	0.937682	-3.55899	0.000372288	0.0154138
Me1	ENSMUSG00000032418	protein_coding	17436	1706.37	-3.341	1.11023	-3.00929	0.00261862	0.0480054
Pbx3	ENSMUSG00000038718	protein_coding	18516	2101.82	-3.34279	0.921792	-3.62641	0.000287393	0.0132007
Gm10222	ENSMUSG00000067736	unprocessed_pseudogene	NA	14169.3	-3.38283	0.974326	-3.47197	0.00051665	0.0184552
Kif17	ENSMUSG00000028758	protein_coding	16559	2497.1	-3.38879	1.04092	-3.25556	0.00113168	0.0295199
Fam13b	ENSMUSG00000036501	protein_coding	225358	4895.56	-3.39166	0.743754	-4.56019	5.11082e-06	0.00119968
Pros1	ENSMUSG00000022912	protein_coding	19128	2314.33	-3.39791	0.903656	-3.76018	0.000169792	0.00972281
Slc45a3	ENSMUSG00000026435	protein_coding	212980	2065.94	-3.40611	0.804717	-4.23269	2.30916e-05	0.00320496
Ctnnbl1	ENSMUSG00000027649	protein_coding	66642	1948.1	-3.40673	0.994647	-3.42506	0.000614665	0.0204356
Vps39	ENSMUSG00000027291	protein_coding	269338	1561.34	-3.41599	1.09567	-3.11771	0.00182261	0.0392175
Ydjc	ENSMUSG00000041774	protein_coding	69101	2724.32	-3.41645	0.945396	-3.61378	0.000301771	0.0136094
Rnf182	ENSMUSG00000044164	protein_coding	328234	1051.44	-3.42932	0.909767	-3.76945	0.000163608	0.00949361
Baz1b	ENSMUSG00000002748	protein_coding	22385	3777.12	-3.43617	1.08111	-3.17836	0.00148112	0.0348989
Gm1976	ENSMUSG00000066057	processed_transcript	NA	944.232	-3.44973	1.09652	-3.14608	0.00165475	0.037121
Hira	ENSMUSG00000022702	protein_coding	15260	6451.35	-3.45572	0.920611	-3.75373	0.000174224	0.00990368
Atxn7l1	ENSMUSG00000020564	protein_coding	380753	4606.89	-3.46174	1.08629	-3.18675	0.00143879	0.0344045
Efcab14	ENSMUSG00000034210	protein_coding	230648	1851.75	-3.46301	1.08698	-3.1859	0.00144305	0.0344684
Fsd2	ENSMUSG00000038663	protein_coding	244091	2981.78	-3.46954	1.12835	-3.07489	0.00210583	0.0424285
Asb3	ENSMUSG00000020305	protein_coding	65257	4817.96	-3.4859	1.00676	-3.4625	0.000535177	0.0187679
Rnf114	ENSMUSG00000006418	protein_coding	81018	3152.12	-3.48689	0.997041	-3.49724	0.000470098	0.0174562
Stx8	ENSMUSG00000020903	protein_coding	55943	3962.71	-3.48849	0.901582	-3.8693	0.000109148	0.00751495
Nlrp4f	ENSMUSG00000032999	protein_coding	97895	1343.45	-3.51514	1.14604	-3.06719	0.0021608	0.0430774
Tmem131	ENSMUSG00000026116	protein_coding	56030	4608.47	-3.5247	1.04	-3.38913	0.000701135	0.0222077
Irx6	ENSMUSG00000031738	protein_coding	64379	53791.4	-3.53574	1.13348	-3.11937	0.00181241	0.0391057
Ankhd1	ENSMUSG00000024483	protein_coding	108857	51134.8	-3.53681	1.02531	-3.44952	0.000561594	0.0193206
Nme2	ENSMUSG00000020857	protein_coding	18103	4838.2	-3.54539	0.889005	-3.98804	6.66209e-05	0.00580025
Nbeal1	ENSMUSG00000073664	protein_coding	269198	4570.83	-3.55361	1.1212	-3.16945	0.00152725	0.0354465
Ttn	ENSMUSG00000051747	protein_coding	22138	974.966	-3.56377	1.1687	-3.04935	0.00229335	0.0443599
Fyco1	ENSMUSG00000025241	protein_coding	17281	5430.22	-3.56669	1.11601	-3.19592	0.00139386	0.0337959
Gm20268	ENSMUSG00000100684	lincRNA	NA	1051.39	-3.56851	0.754824	-4.7276	2.27184e-06	0.000666136
0610010F05Rik	ENSMUSG00000042208	protein_coding	71675	2542.36	-3.5762	1.00045	-3.57461	0.000350754	0.014878
Cyb5r4	ENSMUSG00000032872	protein_coding	266690	4448.95	-3.58015	0.936589	-3.82254	0.000132082	0.00847492
Itgb3	ENSMUSG00000020689	protein_coding	16416	10551.1	-3.58254	0.777329	-4.60879	4.05023e-06	0.00100151
Gtpbp4	ENSMUSG00000021149	protein_coding	69237	14514.5	-3.58774	0.889057	-4.03544	5.44997e-05	0.00515615
Cx3cr1	ENSMUSG00000052336	protein_coding	13051	5234.06	-3.59666	1.06791	-3.36795	0.000757288	0.0231441
Kdm3a	ENSMUSG00000053470	protein_coding	104263	21830.7	-3.59728	0.916974	-3.92299	8.74575e-05	0.00662728
Trim50	ENSMUSG00000053388	protein_coding	215061	651.228	-3.59899	1.11188	-3.23683	0.00120864	0.0308142
Oas1d	ENSMUSG00000032623	protein_coding	100535	23569.3	-3.601	0.859602	-4.18915	2.80006e-05	0.00358368
Rab27a	ENSMUSG00000032202	protein_coding	11891	5519.01	-3.60316	1.13189	-3.18331	0.001456	0.0346099
Mad2l2	ENSMUSG00000029003	protein_coding	71890	4187.82	-3.60859	1.01651	-3.54997	0.000385279	0.0156988
Rbbp4	ENSMUSG00000057236	protein_coding	19646	3755.95	-3.60919	1.17154	-3.08071	0.00206506	0.0419879
Gm12609	ENSMUSG00000085147	processed_transcript	NA	337.775	-3.61154	1.16885	-3.08981	0.00200283	0.0412705
Phc2	ENSMUSG00000028796	protein_coding	54383	2436.73	-3.63058	0.974173	-3.72684	0.000193899	0.010405
Gm30667	ENSMUSG00000102886	lincRNA	NA	1142.52	-3.63359	1.01574	-3.57729	0.000347171	0.0147836
Cmklr1	ENSMUSG00000042190	protein_coding	14747	7448.86	-3.64266	1.12312	-3.24335	0.00118133	0.0302243
Gm44761	ENSMUSG00000109183	lincRNA	NA	274.756	-3.64862	1.109	-3.29	0.00100187	0.0273022
Bmt2	ENSMUSG00000042742	protein_coding	101148	1969.85	-3.65836	0.901071	-4.06001	4.90704e-05	0.00487567
Mthfd1l	ENSMUSG00000040675	protein_coding	270685	873.94	-3.6587	0.959768	-3.81207	0.00013781	0.00869202
Gm9745	ENSMUSG00000021148	protein_coding	NA	10999.7	-3.66011	1.02957	-3.55499	0.000377998	0.0155047
Gsta3	ENSMUSG00000025934	protein_coding	14859	1579.02	-3.66036	1.17954	-3.10322	0.00191429	0.0402557
Defb9	ENSMUSG00000047390	protein_coding	246079	1069.6	-3.66146	1.01834	-3.59552	0.000323744	0.0141849
Erp27	ENSMUSG00000030219	protein_coding	69187	522.997	-3.66243	1.20686	-3.03466	0.00240803	0.0457431
Gm31645	ENSMUSG00000117358	processed_transcript	NA	3513.33	-3.66659	1.10551	-3.31665	0.000911049	0.0258744
Zhx2	ENSMUSG00000071757	protein_coding	387609	1552.49	-3.66934	1.12822	-3.25232	0.00114469	0.0297236
Tpm4	ENSMUSG00000031799	protein_coding	326618	18248.8	-3.67154	0.895837	-4.09844	4.15937e-05	0.00445852
Trak1	ENSMUSG00000032536	protein_coding	67095	23683.5	-3.67181	0.925984	-3.96531	7.33015e-05	0.00607634
Arhgap33	ENSMUSG00000036882	protein_coding	233071	164.57	-3.67186	0.990933	-3.70545	0.000211012	0.0108549
Gm10635	ENSMUSG00000111765	lincRNA	NA	2869.86	-3.69807	1.0297	-3.59141	0.000328893	0.0143134
Pik3r6	ENSMUSG00000046207	protein_coding	104709	3003.18	-3.70267	0.952818	-3.88602	0.000101902	0.00718406
Ndfip2	ENSMUSG00000053253	protein_coding	76273	4340.94	-3.70875	1.20723	-3.07211	0.00212553	0.0427463
Gm20498	ENSMUSG00000021139	protein_coding	105940408	4090.11	-3.70893	0.930671	-3.98522	6.74164e-05	0.00580692
Rock1	ENSMUSG00000024290	protein_coding	19877	7237.31	-3.72494	0.898716	-4.14473	3.40215e-05	0.00401733
Crebbp	ENSMUSG00000022521	protein_coding	12914	3772.62	-3.72793	0.959324	-3.886	0.000101911	0.00718406
Abi1	ENSMUSG00000058835	protein_coding	11308	7211.23	-3.73362	1.02993	-3.62512	0.000288832	0.0132315
Gm26586	ENSMUSG00000097472	antisense	NA	15353.3	-3.73637	0.951359	-3.9274	8.58704e-05	0.00658033
Shld2	ENSMUSG00000041471	protein_coding	75698	1305.6	-3.74206	0.890617	-4.20165	2.64974e-05	0.00348523
Nudt3	ENSMUSG00000024213	protein_coding	56409	14122.9	-3.74413	1.1139	-3.36128	0.00077583	0.023431
Trim12c	ENSMUSG00000057143	protein_coding	319236	1.0915e+07	-3.74634	0.881639	-4.24929	2.14449e-05	0.00304
Btaf1	ENSMUSG00000040565	protein_coding	107182	3456.8	-3.75114	0.793587	-4.72682	2.28066e-06	0.000666136
Zyg11b	ENSMUSG00000034636	protein_coding	414872	2030.81	-3.75792	1.19774	-3.13751	0.0017039	0.0378915
Numa1	ENSMUSG00000066306	protein_coding	101706	5073.05	-3.7626	1.21958	-3.08517	0.00203438	0.0416837
Dazap1	ENSMUSG00000069565	protein_coding	70248	2774.88	-3.76892	0.986346	-3.82109	0.000132863	0.00847829
Trim30a	ENSMUSG00000030921	protein_coding	20128	1.09077e+07	-3.77019	0.887055	-4.25023	2.13551e-05	0.00303717
Habp2	ENSMUSG00000025075	protein_coding	226243	181.126	-3.78184	1.2365	-3.05851	0.00222441	0.0435671
Drosha	ENSMUSG00000022191	protein_coding	14000	1848.57	-3.79045	1.16626	-3.2501	0.00115366	0.0297908
Slc7a6	ENSMUSG00000031904	protein_coding	330836	3283.19	-3.81179	1.21901	-3.12695	0.0017663	0.0384923
Atp8b4	ENSMUSG00000060131	protein_coding	241633	30221.2	-3.8203	1.16745	-3.27235	0.00106657	0.0283723
Adam17	ENSMUSG00000052593	protein_coding	11491	4411.96	-3.83151	1.05491	-3.63207	0.000281157	0.013017
Pced1b	ENSMUSG00000044250	protein_coding	239647	5069.56	-3.83245	0.844148	-4.54002	5.62479e-06	0.00127495
Hdac4	ENSMUSG00000026313	protein_coding	208727	1910.58	-3.83611	1.00371	-3.82191	0.000132421	0.00847492
Plec	ENSMUSG00000022565	protein_coding	18810	7081.96	-3.83889	1.10814	-3.46427	0.00053167	0.0187235
Plcl2	ENSMUSG00000038910	protein_coding	224860	7549.07	-3.8441	1.01112	-3.80183	0.000143631	0.00889163
Rab43	ENSMUSG00000030055	protein_coding	69834	963.77	-3.86506	1.28885	-2.99885	0.00271002	0.0488567
Scai	ENSMUSG00000035236	protein_coding	320271	5117.49	-3.86693	0.943968	-4.09646	4.19512e-05	0.00447524
Gm44930	ENSMUSG00000108851	antisense	NA	319.912	-3.87286	1.1144	-3.47529	0.000510304	0.0182785
Atp2c1	ENSMUSG00000032570	protein_coding	235574	3039.85	-3.88	1.10723	-3.50424	0.000457907	0.0172388
Sytl2	ENSMUSG00000030616	protein_coding	83671	16462.6	-3.88763	1.15153	-3.37604	0.000735362	0.0227779
Pet100	ENSMUSG00000087687	protein_coding	100503890	990.363	-3.90397	1.05937	-3.68519	0.000228531	0.0113665
Cdk8	ENSMUSG00000029635	protein_coding	264064	5695.76	-3.90529	1.23482	-3.16265	0.00156342	0.035924
Man2a1	ENSMUSG00000024085	protein_coding	17158	4371.3	-3.90669	1.09635	-3.56335	0.000366158	0.0152782
Olfr739	ENSMUSG00000057903	protein_coding	258663	691.343	-3.91129	1.19927	-3.26141	0.00110861	0.0291597
Rbm26	ENSMUSG00000022119	protein_coding	74213	7700.96	-3.92228	1.07408	-3.65175	0.000260455	0.012361
Pkn2	ENSMUSG00000004591	protein_coding	109333	3801.07	-3.9247	0.97749	-4.01508	5.9426e-05	0.00546068
Setd7	ENSMUSG00000037111	protein_coding	73251	3105.83	-3.92857	1.18723	-3.30902	0.000936233	0.0262442
Aktip	ENSMUSG00000031667	protein_coding	14339	5371.52	-3.93111	1.04143	-3.77471	0.000160192	0.00935811
Ezh1	ENSMUSG00000006920	protein_coding	14055	2192.76	-3.93162	1.10247	-3.56619	0.000362204	0.0152153
Ldb1	ENSMUSG00000025223	protein_coding	16825	1260.67	-3.93218	1.18618	-3.315	0.000916436	0.0259329
Hagh	ENSMUSG00000024158	protein_coding	14651	1590.97	-3.94192	1.15403	-3.41579	0.000635979	0.0208574
Unc5a	ENSMUSG00000025876	protein_coding	107448	1206.38	-3.94502	0.992936	-3.97309	7.09467e-05	0.0060057
Slc4a7	ENSMUSG00000021733	protein_coding	218756	4486.85	-3.94646	1.07071	-3.68584	0.000227954	0.0113508
Hgf	ENSMUSG00000028864	protein_coding	15234	1044.2	-3.94803	1.29596	-3.04641	0.00231595	0.0445806
Mblac2	ENSMUSG00000051098	protein_coding	72852	1029.32	-3.9488	1.1598	-3.40474	0.000662262	0.0214925
Sugt1	ENSMUSG00000022024	protein_coding	67955	1318.15	-3.96171	1.02398	-3.86895	0.000109305	0.00751495
Gm44659	ENSMUSG00000109214	lincRNA	NA	1789.64	-3.96477	1.21964	-3.25077	0.00115093	0.0297908
Ube2ql1	ENSMUSG00000052981	protein_coding	76980	440.283	-3.96566	1.1154	-3.55538	0.000377438	0.0154963
Ahcyl2	ENSMUSG00000029772	protein_coding	74340	1602.24	-3.98391	1.08746	-3.66351	0.000248785	0.0120302
Cdk13	ENSMUSG00000041297	protein_coding	69562	6346.6	-3.98707	1.01852	-3.91457	9.05649e-05	0.00673631
Tcerg1	ENSMUSG00000024498	protein_coding	56070	19178.4	-3.98793	1.04968	-3.79917	0.000145179	0.008924
Cdc42	ENSMUSG00000006699	protein_coding	12540	13537.1	-3.99386	1.10029	-3.62983	0.000283608	0.013061
Ly75	ENSMUSG00000026980	protein_coding	17076	2603.92	-4.00745	0.954545	-4.19828	2.6895e-05	0.00349394
Gpr37	ENSMUSG00000039904	protein_coding	14763	212.906	-4.01076	1.3389	-2.99556	0.00273937	0.0491214
Prcc	ENSMUSG00000004895	protein_coding	94315	969.651	-4.01381	0.98481	-4.07573	4.58709e-05	0.00469718
Fam49b	ENSMUSG00000022378	protein_coding	223601	16516.2	-4.02137	1.0732	-3.74709	0.000178896	0.00998523
Gm49342	ENSMUSG00000021871	protein_coding	NA	2775.63	-4.02203	1.21793	-3.30235	0.000958792	0.0265498
Fam78b	ENSMUSG00000060568	protein_coding	226610	934.654	-4.02539	1.19057	-3.38105	0.000722103	0.0226249
Zfp983	ENSMUSG00000035868	protein_coding	73229	6901.13	-4.02943	1.13417	-3.55275	0.000381233	0.0155933
Vav1	ENSMUSG00000034116	protein_coding	22324	3515.97	-4.03342	1.32278	-3.04919	0.00229458	0.0443599
Fbxw11	ENSMUSG00000020271	protein_coding	103583	2001.31	-4.04086	1.12957	-3.57734	0.00034711	0.0147836
Hmbox1	ENSMUSG00000021972	protein_coding	219150	2219.47	-4.04146	1.0776	-3.75041	0.000176546	0.00993958
Uaca	ENSMUSG00000034485	protein_coding	72565	537.98	-4.04649	1.21487	-3.33079	0.00086601	0.0251594
Cdk19	ENSMUSG00000038481	protein_coding	78334	4597.67	-4.04993	1.16051	-3.48979	0.000483396	0.0176192
Trip4	ENSMUSG00000032386	protein_coding	56404	3856.24	-4.05227	1.11766	-3.62567	0.000288211	0.013217
Creb3l2	ENSMUSG00000038648	protein_coding	208647	1938.67	-4.06795	0.916672	-4.43774	9.09096e-06	0.00169171
Nf1	ENSMUSG00000020716	protein_coding	18015	6964.07	-4.09933	0.859801	-4.76777	1.86277e-06	0.000596949
Gm28991	ENSMUSG00000101079	antisense	NA	319.542	-4.09948	1.31011	-3.12912	0.0017533	0.0384098
4930570E03Rik	ENSMUSG00000116786	lincRNA	NA	214.488	-4.10259	1.20768	-3.39708	0.000681082	0.0218589
Dhcr7	ENSMUSG00000058454	protein_coding	13360	612.995	-4.10536	1.05626	-3.8867	0.000101617	0.00718406
4930532M18Rik	ENSMUSG00000100221	lincRNA	NA	142.872	-4.12148	1.31635	-3.13099	0.00174216	0.0383317
Mgat5	ENSMUSG00000036155	protein_coding	107895	15563.5	-4.12239	1.19419	-3.45204	0.000556359	0.019186
Gtf2ird1	ENSMUSG00000023079	protein_coding	57080	494.973	-4.12998	1.17757	-3.5072	0.000452854	0.0171824
Vopp1	ENSMUSG00000037788	protein_coding	232023	1492.08	-4.13031	0.867135	-4.76317	1.90572e-06	0.000600991
Gm42436	ENSMUSG00000105517	TEC	NA	312.411	-4.13385	1.34831	-3.06596	0.00216974	0.043078
Birc6	ENSMUSG00000024073	protein_coding	12211	9173.53	-4.14152	1.16746	-3.54747	0.000388953	0.0157609
Zfyve16	ENSMUSG00000021706	protein_coding	218441	2465.25	-4.14229	0.931992	-4.44456	8.80732e-06	0.00169171
Gm13571	ENSMUSG00000086196	antisense	NA	1468.03	-4.14237	1.18351	-3.50007	0.000465137	0.0173907
Larp1b	ENSMUSG00000025762	protein_coding	214048	565.182	-4.14567	1.09906	-3.77203	0.000161927	0.00940862
Wac	ENSMUSG00000024283	protein_coding	225131	3088.89	-4.14948	1.22104	-3.39832	0.000678011	0.0218086
R3hdm1	ENSMUSG00000056211	protein_coding	226412	2994.05	-4.15712	1.29312	-3.21479	0.00130538	0.0322969
Sigmar1	ENSMUSG00000036078	protein_coding	18391	889.324	-4.16273	1.11222	-3.74272	0.000182041	0.0100923
Usp3	ENSMUSG00000032376	protein_coding	235441	3208.36	-4.18552	1.13798	-3.67804	0.000235036	0.0115413
Ep300	ENSMUSG00000055024	protein_coding	328572	3170.05	-4.18906	1.32504	-3.16146	0.00156978	0.0359873
Ece1	ENSMUSG00000057530	protein_coding	230857	1852	-4.1912	1.04229	-4.02114	5.79166e-05	0.00538575
Ccdc126	ENSMUSG00000050786	protein_coding	57895	111.068	-4.19521	1.35188	-3.10325	0.0019141	0.0402557
Zfp638	ENSMUSG00000030016	protein_coding	18139	6186.36	-4.19955	1.03574	-4.05464	5.02117e-05	0.00494224
Pepd	ENSMUSG00000063931	protein_coding	18624	6107.1	-4.21318	0.917579	-4.59163	4.39805e-06	0.00106929
Clnk	ENSMUSG00000039315	protein_coding	27278	12469.5	-4.21408	1.19651	-3.52198	0.000428338	0.016644
Spata6	ENSMUSG00000034401	protein_coding	67946	3414.67	-4.2143	1.01929	-4.13455	3.55654e-05	0.00411651
Nmt1	ENSMUSG00000020936	protein_coding	18107	1293.84	-4.22311	1.37896	-3.06253	0.00219474	0.0432938
Wdr26	ENSMUSG00000038733	protein_coding	226757	7467.36	-4.24067	1.0322	-4.10837	3.9846e-05	0.00437183
Gnaq	ENSMUSG00000024639	protein_coding	14682	4680.08	-4.25917	1.08142	-3.9385	8.19931e-05	0.00642944
Vmn1r208	ENSMUSG00000071493	protein_coding	171252	440.499	-4.27887	1.13069	-3.7843	0.000154143	0.0091769
Mxd1	ENSMUSG00000001156	protein_coding	17119	245.072	-4.28814	1.03227	-4.15411	3.2656e-05	0.00396805
Polk	ENSMUSG00000021668	protein_coding	27015	5238.4	-4.29093	1.2437	-3.45014	0.000560297	0.0192912
Ahdc1	ENSMUSG00000037692	protein_coding	230793	3411.55	-4.2943	1.0508	-4.08669	4.37575e-05	0.00458874
2310001H17Rik	ENSMUSG00000097354	lincRNA	NA	1721.62	-4.30102	1.33835	-3.21366	0.00131054	0.0323302
Mical3	ENSMUSG00000051586	protein_coding	194401	3351.1	-4.30817	1.232	-3.49689	0.000470722	0.0174603
Bcl11b	ENSMUSG00000048251	protein_coding	58208	480.066	-4.31036	1.08513	-3.97222	7.12073e-05	0.0060057
Ubxn7	ENSMUSG00000053774	protein_coding	224111	3944.07	-4.31984	1.16341	-3.71308	0.000204752	0.0107749
Gm11060	ENSMUSG00000079175	protein_coding	NA	2268.74	-4.33831	1.04696	-4.14371	3.41735e-05	0.00401733
Hook2	ENSMUSG00000052566	protein_coding	170833	581.503	-4.33872	1.22233	-3.54955	0.000385886	0.0156988
Dlgap4	ENSMUSG00000061689	protein_coding	228836	8174.58	-4.33884	1.14317	-3.79543	0.000147389	0.00897368
1700025G04Rik	ENSMUSG00000032666	protein_coding	69399	4448.35	-4.34424	0.976059	-4.45079	8.55541e-06	0.00168476
Mindy3	ENSMUSG00000026767	protein_coding	66960	2731.23	-4.35285	1.04271	-4.17455	2.98577e-05	0.00372323
Cep192	ENSMUSG00000024542	protein_coding	70799	4768.97	-4.35751	1.28255	-3.39753	0.000679966	0.0218392
Col6a5	ENSMUSG00000091345	protein_coding	665033	359.714	-4.35819	1.41324	-3.08384	0.00204347	0.0417632
Hykk	ENSMUSG00000035878	protein_coding	235386	122.246	-4.35989	1.38911	-3.13862	0.00169745	0.0378254
Mcph1	ENSMUSG00000039842	protein_coding	244329	1225.79	-4.36351	1.45992	-2.98886	0.0028002	0.049761
Ccdc169	ENSMUSG00000048655	protein_coding	320604	13665.4	-4.36685	1.28649	-3.39438	0.000687832	0.0219783
Tcf7	ENSMUSG00000000782	protein_coding	21414	1110.74	-4.36752	1.09146	-4.00152	6.29357e-05	0.00563572
B4galnt2	ENSMUSG00000013418	protein_coding	14422	1126.92	-4.37163	1.28738	-3.39576	0.000684385	0.0219077
Ormdl2	ENSMUSG00000025353	protein_coding	66844	358.554	-4.38311	1.43663	-3.05096	0.00228114	0.0442402
Tle1	ENSMUSG00000008305	protein_coding	21885	497.397	-4.38485	1.25327	-3.49873	0.000467481	0.0174227
Specc1l	ENSMUSG00000033444	protein_coding	74392	1077.31	-4.38737	1.32788	-3.30405	0.000952998	0.0265023
Ep400	ENSMUSG00000029505	protein_coding	75560	7319.19	-4.38958	1.26197	-3.47837	0.000504473	0.0181744
Yeats2	ENSMUSG00000041215	protein_coding	208146	963.228	-4.40349	1.37459	-3.20349	0.00135773	0.0331806
Smyd3	ENSMUSG00000055067	protein_coding	69726	10939.6	-4.40856	1.05525	-4.17773	2.94429e-05	0.00371212
Pltp	ENSMUSG00000017754	protein_coding	18830	820.18	-4.41607	1.0999	-4.01496	5.94554e-05	0.00546068
Mipep	ENSMUSG00000021993	protein_coding	70478	868.959	-4.43151	1.30901	-3.3854	0.000710756	0.0223821
Gm15336	ENSMUSG00000086312	antisense	NA	328.471	-4.43243	1.45429	-3.04783	0.00230497	0.0444843
Dop1b	ENSMUSG00000022946	protein_coding	70028	2592.71	-4.44166	1.18599	-3.7451	0.000180319	0.0100352
Nde1	ENSMUSG00000022678	protein_coding	67203	585.372	-4.44867	1.44324	-3.08243	0.00205321	0.0418784
Prkcd	ENSMUSG00000021948	protein_coding	18753	448.628	-4.45964	1.15482	-3.86177	0.000112567	0.00764262
Agpat4	ENSMUSG00000023827	protein_coding	68262	901.233	-4.46356	1.30028	-3.43276	0.000597473	0.0200532
Dnase2a	ENSMUSG00000003812	protein_coding	13423	309.697	-4.46516	1.46443	-3.04908	0.00229546	0.0443599
Lrif1	ENSMUSG00000056260	protein_coding	321000	2689.72	-4.46962	1.48751	-3.00476	0.00265791	0.0484657
Ptpra	ENSMUSG00000027303	protein_coding	19262	3379	-4.4779	1.42377	-3.14511	0.00166024	0.0371484
Lyst	ENSMUSG00000019726	protein_coding	17101	2038.73	-4.48147	1.04686	-4.28089	1.8615e-05	0.00281294
F730016J06Rik	ENSMUSG00000086425	lincRNA	NA	312.437	-4.48613	1.18313	-3.79175	0.000149588	0.00905433
Ets1	ENSMUSG00000032035	protein_coding	23871	2693.32	-4.48934	1.17892	-3.80801	0.00014009	0.00874708
Lrrc8a	ENSMUSG00000007476	protein_coding	241296	1163.02	-4.49621	1.34857	-3.33406	0.000855879	0.024965
Pnpla7	ENSMUSG00000036833	protein_coding	241274	2889.43	-4.50058	1.03194	-4.36129	1.293e-05	0.00216013
Rapgefl1	ENSMUSG00000038020	protein_coding	268480	2673.75	-4.509	1.24966	-3.60817	0.000308365	0.0138494
Gm14546	ENSMUSG00000086762	antisense	NA	643.438	-4.51682	1.41016	-3.20306	0.00135976	0.0332048
Ptprc	ENSMUSG00000026395	protein_coding	19264	46938.5	-4.5241	1.16811	-3.87302	0.000107496	0.00744937
Clmn	ENSMUSG00000021097	protein_coding	94040	3811.2	-4.5347	1.00859	-4.49607	6.92201e-06	0.0014483
Tlk2	ENSMUSG00000020694	protein_coding	24086	2130.68	-4.54943	0.983262	-4.62688	3.7122e-06	0.000947842
Styk1	ENSMUSG00000032899	protein_coding	243659	1632.51	-4.55325	1.3809	-3.29732	0.000976133	0.0269008
H2-T22	ENSMUSG00000056116	protein_coding	15039	526.963	-4.56559	1.30095	-3.50943	0.000449065	0.0171257
H2-T22	ENSMUSG00000056116	protein_coding	15051	526.963	-4.56559	1.30095	-3.50943	0.000449065	0.0171257
Gm46526	ENSMUSG00000116072	lincRNA	NA	710.908	-4.58219	1.03197	-4.44026	8.98523e-06	0.00169171
Capzb	ENSMUSG00000028745	protein_coding	12345	3956.2	-4.60445	1.25922	-3.6566	0.000255583	0.0121962
Rai14	ENSMUSG00000022246	protein_coding	75646	2134.4	-4.60981	1.46099	-3.15527	0.0016035	0.0364599
Tcp10a	ENSMUSG00000071322	protein_coding	21461	200.972	-4.61133	1.16855	-3.94621	7.93966e-05	0.00634007
Rab2a	ENSMUSG00000047187	protein_coding	59021	4421.34	-4.61621	1.32194	-3.49198	0.000479451	0.0175765
Gm49192	ENSMUSG00000115000	lincRNA	NA	91.1565	-4.62906	1.51525	-3.05498	0.00225075	0.0438653
Cand2	ENSMUSG00000030319	protein_coding	67088	21017.1	-4.64176	1.40201	-3.31079	0.000930324	0.026138
Dennd4c	ENSMUSG00000038024	protein_coding	329877	12136.4	-4.65228	1.20671	-3.85535	0.000115563	0.00776691
Nrip3	ENSMUSG00000034825	protein_coding	78593	315.124	-4.65529	1.45777	-3.19344	0.00140588	0.0339379
Edem1	ENSMUSG00000030104	protein_coding	192193	6336.35	-4.66119	1.54205	-3.02273	0.00250506	0.0466496
Cdc5l	ENSMUSG00000023932	protein_coding	71702	1005.92	-4.6615	1.30879	-3.56168	0.000368488	0.0153314
Pou2f1	ENSMUSG00000026565	protein_coding	18986	2486.42	-4.67534	1.19658	-3.90725	9.33538e-05	0.00683985
Psme4	ENSMUSG00000040850	protein_coding	103554	4329.16	-4.67729	1.24268	-3.76386	0.000167309	0.0096059
Tmem163	ENSMUSG00000026347	protein_coding	72160	11370.9	-4.68112	0.914923	-5.11641	3.11399e-07	0.000163278
Pde3b	ENSMUSG00000030671	protein_coding	18576	7468.11	-4.69649	1.26904	-3.70083	0.000214898	0.0109384
Akap13	ENSMUSG00000066406	protein_coding	75547	16248.4	-4.70257	1.19673	-3.9295	8.51233e-05	0.00656838
Bptf	ENSMUSG00000040481	protein_coding	207165	4085.9	-4.73392	1.54184	-3.0703	0.00213841	0.0428351
Klhl5	ENSMUSG00000054920	protein_coding	71778	3245.08	-4.74961	1.01965	-4.65809	3.19151e-06	0.000857374
Ptk2b	ENSMUSG00000059456	protein_coding	19229	7504.08	-4.75193	1.3887	-3.42185	0.000621965	0.0205273
Ephx2	ENSMUSG00000022040	protein_coding	13850	671.659	-4.75912	1.36239	-3.49322	0.000477229	0.017545
Chga	ENSMUSG00000021194	protein_coding	12652	1035.68	-4.76226	1.18263	-4.02683	5.65336e-05	0.00528001
Gm42468	ENSMUSG00000105092	lincRNA	NA	70.5217	-4.7718	1.29296	-3.69062	0.00022371	0.0111907
Mycbp2	ENSMUSG00000033004	protein_coding	105689	16335	-4.78235	1.02234	-4.67784	2.89908e-06	0.000788549
Slc30a9	ENSMUSG00000029221	protein_coding	109108	1487.95	-4.78457	1.32914	-3.59975	0.000318529	0.0140589
Mrtfa	ENSMUSG00000042292	protein_coding	223701	3481.57	-4.79703	1.11663	-4.29597	1.73929e-05	0.00270335
Itga4	ENSMUSG00000027009	protein_coding	16401	3248.4	-4.80274	1.29475	-3.7094	0.000207749	0.0107941
Lrrk1	ENSMUSG00000015133	protein_coding	233328	13168.6	-4.80997	1.23989	-3.87934	0.000104739	0.00731563
Plcg2	ENSMUSG00000034330	protein_coding	234779	3885.07	-4.82293	1.24566	-3.8718	0.000108036	0.00746308
Slf1	ENSMUSG00000021597	protein_coding	105377	1820.17	-4.82428	1.43227	-3.36827	0.000756401	0.0231441
Gm38394	ENSMUSG00000094410	protein_coding	667118	5906.83	-4.82625	1.28685	-3.75043	0.000176532	0.00993958
Ssbp3	ENSMUSG00000061887	protein_coding	72475	4207.8	-4.82724	1.60586	-3.00602	0.00264696	0.0483839
Clasp2	ENSMUSG00000033392	protein_coding	76499	5661.23	-4.84236	0.953363	-5.07924	3.78945e-07	0.00017673
Lamc1	ENSMUSG00000026478	protein_coding	226519	1814.54	-4.85548	1.42823	-3.39964	0.000674742	0.0217356
Setd5	ENSMUSG00000034269	protein_coding	72895	5793.24	-4.86007	1.33347	-3.64467	0.000267736	0.0126108
Vmn2r82	ENSMUSG00000091468	protein_coding	624845	368.441	-4.87101	1.34849	-3.61219	0.000303626	0.0136647
Dag1	ENSMUSG00000039952	protein_coding	13138	414.964	-4.88203	1.23559	-3.95117	7.77708e-05	0.00630276
Rufy3	ENSMUSG00000029291	protein_coding	52822	677.239	-4.88652	1.36294	-3.58527	0.000336726	0.0145524
Atg14	ENSMUSG00000037526	protein_coding	100504663	215.341	-4.88969	1.60364	-3.04913	0.00229508	0.0443599
Lrrc8c	ENSMUSG00000054720	protein_coding	100604	10217.6	-4.89153	1.17799	-4.15244	3.28944e-05	0.00397657
Mfhas1	ENSMUSG00000070056	protein_coding	52065	445.856	-4.89369	1.25335	-3.9045	9.4422e-05	0.00689471
Ccar1	ENSMUSG00000020074	protein_coding	67500	4502.58	-4.92065	1.48103	-3.32246	0.000892285	0.0256387
Ddhd1	ENSMUSG00000037697	protein_coding	114874	1290.78	-4.92446	1.51561	-3.24915	0.00115749	0.0297908
Dlg4	ENSMUSG00000020886	protein_coding	13385	333.626	-4.93164	1.25275	-3.93665	8.26277e-05	0.00646755
Fyn	ENSMUSG00000019843	protein_coding	14360	6865.75	-4.93786	1.27013	-3.8877	0.000101199	0.00718406
Cdc73	ENSMUSG00000026361	protein_coding	214498	2124.8	-4.9598	1.34249	-3.69448	0.000220336	0.0110984
Mex3c	ENSMUSG00000037253	protein_coding	240396	657.78	-4.9655	1.20709	-4.11363	3.89487e-05	0.0043131
Smim4	ENSMUSG00000058351	protein_coding	66487	1534.77	-4.96743	0.94342	-5.26535	1.39925e-07	8.69935e-05
Olfr1082	ENSMUSG00000111689	protein_coding	404473	864.316	-4.96854	1.65827	-2.99622	0.00273347	0.0490559
Clic5	ENSMUSG00000023959	protein_coding	224796	491.094	-4.97597	1.25518	-3.96436	7.35943e-05	0.00608368
Tmem222	ENSMUSG00000028857	protein_coding	52174	347.519	-4.97924	1.241	-4.01227	6.01385e-05	0.00546068
Zdhhc2	ENSMUSG00000039470	protein_coding	70546	1900.13	-4.97924	1.33969	-3.7167	0.000201843	0.0106734
Rhbdf2	ENSMUSG00000020806	protein_coding	217344	833.582	-4.98644	1.52825	-3.26284	0.00110301	0.029128
Pole4	ENSMUSG00000030042	protein_coding	66979	893.986	-5.00591	1.60429	-3.12032	0.00180652	0.039075
Gm43506	ENSMUSG00000106332	TEC	NA	118.425	-5.01583	1.60297	-3.12909	0.00175348	0.0384098
Slc6a6	ENSMUSG00000030096	protein_coding	21366	1702.33	-5.01857	1.40884	-3.56221	0.000367749	0.0153152
Kdm7a	ENSMUSG00000042599	protein_coding	338523	3259.18	-5.02234	1.21244	-4.14235	3.43763e-05	0.00401733
Rbm39	ENSMUSG00000027620	protein_coding	170791	9345.4	-5.03263	1.65886	-3.03379	0.002415	0.0457664
Myo10	ENSMUSG00000022272	protein_coding	17909	14408.5	-5.03591	1.15882	-4.34573	1.38812e-05	0.00227966
Gm12606	ENSMUSG00000087659	lincRNA	NA	608.811	-5.04888	1.29867	-3.88774	0.000101184	0.00718406
Usp24	ENSMUSG00000028514	protein_coding	329908	5425.31	-5.05038	1.46973	-3.43627	0.000589784	0.0198838
Dnajc5	ENSMUSG00000000826	protein_coding	13002	2254.52	-5.05426	1.45094	-3.48344	0.000495017	0.0179573
ENSMUSG00000118563	ENSMUSG00000118563	unitary_pseudogene	NA	399.188	-5.05766	1.22753	-4.12018	3.78572e-05	0.00422648
Fam169a	ENSMUSG00000041817	protein_coding	320557	1410.17	-5.06061	1.23727	-4.09013	4.31123e-05	0.00455578
Erp44	ENSMUSG00000028343	protein_coding	76299	4772.25	-5.06177	1.3154	-3.84809	0.000119041	0.00793366
Mbnl1	ENSMUSG00000027763	protein_coding	56758	43315.8	-5.07775	1.12155	-4.52746	5.96966e-06	0.00131231
Kpna1	ENSMUSG00000022905	protein_coding	16646	5291.46	-5.08224	1.57943	-3.21776	0.00129194	0.0320851
Snrnp40	ENSMUSG00000074088	protein_coding	66585	857.346	-5.11147	1.14237	-4.47446	7.66063e-06	0.0015579
4930432K21Rik	ENSMUSG00000008129	protein_coding	74666	477.194	-5.11215	1.56352	-3.26963	0.00107687	0.0286288
Lmtk2	ENSMUSG00000038970	protein_coding	231876	433.188	-5.11756	1.38122	-3.70511	0.0002113	0.0108569
Clcn4	ENSMUSG00000000605	protein_coding	12727	1407.67	-5.15507	1.1581	-4.45133	8.53381e-06	0.00168476
Osr1	ENSMUSG00000048387	protein_coding	23967	241.275	-5.15605	1.29407	-3.98438	6.76556e-05	0.00580744
Htra1	ENSMUSG00000006205	protein_coding	56213	725.366	-5.1566	1.24458	-4.14324	3.42439e-05	0.00401733
Cnksr3	ENSMUSG00000015202	protein_coding	215748	1652.04	-5.15896	1.25767	-4.10199	4.09617e-05	0.00443446
Gad1	ENSMUSG00000070880	protein_coding	14415	223.737	-5.16814	1.491	-3.46622	0.000527839	0.0186761
Mvk	ENSMUSG00000041939	protein_coding	17855	1026.59	-5.18841	1.3253	-3.9149	9.04405e-05	0.00673631
Slain2	ENSMUSG00000036087	protein_coding	75991	2045.71	-5.192	1.36337	-3.80822	0.000139971	0.00874708
Gm47561	ENSMUSG00000112286	lincRNA	NA	1119.93	-5.19432	1.69264	-3.06876	0.00214947	0.0429397
Relch	ENSMUSG00000026319	protein_coding	227446	3882.45	-5.19585	1.31714	-3.9448	7.98672e-05	0.00635433
Trbj1-1	ENSMUSG00000076483	TR_J_gene	NA	7865.77	-5.19679	1.6743	-3.10385	0.0019102	0.0402556
Dcp1b	ENSMUSG00000041477	protein_coding	319618	166.654	-5.20042	1.7031	-3.0535	0.00226192	0.0440157
Gna13	ENSMUSG00000020611	protein_coding	14674	915.228	-5.21165	1.56056	-3.3396	0.000838985	0.0246208
Ppp6c	ENSMUSG00000026753	protein_coding	67857	2755.43	-5.22036	1.41893	-3.67909	0.00023407	0.0115241
C430002N11Rik	ENSMUSG00000101581	processed_transcript	NA	340.205	-5.2234	1.39697	-3.7391	0.000184678	0.0101866
Ube2e3	ENSMUSG00000027011	protein_coding	22193	1272.41	-5.22908	1.51798	-3.44475	0.000571581	0.0195406
Gm12185	ENSMUSG00000048852	protein_coding	620913	1704.39	-5.24633	1.23999	-4.23094	2.32713e-05	0.00320496
L2hgdh	ENSMUSG00000020988	protein_coding	217666	2118.29	-5.26147	1.5068	-3.49182	0.000479746	0.0175765
Hps4	ENSMUSG00000042328	protein_coding	192232	438.083	-5.26765	1.31044	-4.01975	5.82608e-05	0.0054062
Gm15564	ENSMUSG00000086324	antisense	NA	3438.39	-5.2717	1.57716	-3.34253	0.000830195	0.0245403
Ccnt2	ENSMUSG00000026349	protein_coding	72949	3875.34	-5.27463	1.74123	-3.02925	0.00245162	0.0461283
Cand1	ENSMUSG00000020114	protein_coding	71902	3933.18	-5.27586	1.56132	-3.3791	0.000727233	0.022719
Rai1	ENSMUSG00000062115	protein_coding	19377	2733.23	-5.28847	1.58166	-3.34362	0.000826917	0.0244666
Rev1	ENSMUSG00000026082	protein_coding	56210	1429.15	-5.29449	1.73314	-3.05485	0.00225172	0.0438653
Ctsc	ENSMUSG00000030560	protein_coding	13032	3545.24	-5.29773	1.63026	-3.24962	0.00115561	0.0297908
Marchf8	ENSMUSG00000025702	protein_coding	71779	1362.24	-5.30594	1.2851	-4.12882	3.64625e-05	0.0041431
Ubfd1	ENSMUSG00000030870	protein_coding	28018	2057.02	-5.31096	1.58071	-3.35985	0.000779843	0.0234708
Rab7	ENSMUSG00000079477	protein_coding	19349	2144.48	-5.31194	1.43072	-3.71277	0.000205001	0.0107749
Gm31819	ENSMUSG00000117984	lincRNA	NA	328.788	-5.32503	1.59705	-3.33428	0.000855199	0.0249619
Cep170	ENSMUSG00000057335	protein_coding	545389	2707.94	-5.33512	1.62873	-3.27564	0.00105423	0.0282281
Prrc1	ENSMUSG00000024594	protein_coding	73137	2931.26	-5.33531	1.42582	-3.74193	0.00018261	0.0101109
Cobll1	ENSMUSG00000034903	protein_coding	319876	1130.76	-5.33571	1.30121	-4.10059	4.12104e-05	0.00444491
Cd47	ENSMUSG00000055447	protein_coding	16423	18229.4	-5.34746	1.29078	-4.14282	3.43054e-05	0.00401733
Odf2l	ENSMUSG00000028256	protein_coding	52184	519.7	-5.35009	1.58584	-3.37366	0.000741756	0.022888
Esyt1	ENSMUSG00000025366	protein_coding	23943	5316.9	-5.37427	1.69324	-3.17396	0.00150373	0.0351652
Mapk14	ENSMUSG00000053436	protein_coding	26416	1593.18	-5.38214	1.33159	-4.04189	5.30218e-05	0.00507145
Ube4b	ENSMUSG00000028960	protein_coding	63958	3003.07	-5.38402	1.71596	-3.13762	0.00170327	0.0378915
Hlcs	ENSMUSG00000040820	protein_coding	110948	408.611	-5.38641	1.58141	-3.40607	0.000659044	0.0214071
Psd4	ENSMUSG00000026979	protein_coding	215632	8582.85	-5.39106	1.76038	-3.06244	0.00219537	0.0432938
Kidins220	ENSMUSG00000036333	protein_coding	77480	34391.6	-5.39392	1.13699	-4.74402	2.09517e-06	0.000633207
Ubr5	ENSMUSG00000037487	protein_coding	70790	13674.1	-5.40999	1.54157	-3.5094	0.00044912	0.0171257
Phf11b	ENSMUSG00000091649	protein_coding	236451	395.552	-5.42225	1.73748	-3.12076	0.00180388	0.039075
Sec23ip	ENSMUSG00000055319	protein_coding	207352	703.911	-5.42674	1.63181	-3.3256	0.000882291	0.0254624
Metap2	ENSMUSG00000036112	protein_coding	56307	3448.92	-5.43133	1.4476	-3.75195	0.000175466	0.00993013
Hspbap1	ENSMUSG00000022849	protein_coding	66667	770.524	-5.43209	1.38424	-3.92423	8.70088e-05	0.00660841
Bicd2	ENSMUSG00000037933	protein_coding	76895	1307.91	-5.43532	1.34805	-4.03197	5.53108e-05	0.00519897
Patl2	ENSMUSG00000027233	protein_coding	67578	56276.2	-5.44598	1.63941	-3.32192	0.000894002	0.0256642
Usp40	ENSMUSG00000005501	protein_coding	227334	2676.59	-5.45805	1.35366	-4.03207	5.52871e-05	0.00519897
Nrf1	ENSMUSG00000058440	protein_coding	18181	1150.85	-5.47073	1.53122	-3.5728	0.000353184	0.0149229
Id2	ENSMUSG00000020644	protein_coding	15902	34166.3	-5.48351	1.13377	-4.83654	1.32116e-06	0.000445711
Eps15	ENSMUSG00000028552	protein_coding	13858	4464.32	-5.49607	1.47056	-3.73739	0.000185937	0.0101918
Gm12905	ENSMUSG00000085875	processed_transcript	NA	1011.71	-5.50067	1.44834	-3.79791	0.00014592	0.00895692
Ank	ENSMUSG00000022265	protein_coding	11732	2622.1	-5.51449	1.36371	-4.04374	5.26048e-05	0.00504265
Brms1l	ENSMUSG00000012076	protein_coding	52592	1089.15	-5.51654	1.33146	-4.14323	3.42455e-05	0.00401733
Klhl8	ENSMUSG00000029312	protein_coding	246293	1530.28	-5.5293	1.78366	-3.09997	0.00193539	0.040436
Prpf8	ENSMUSG00000020850	protein_coding	192159	6041.8	-5.54367	1.64831	-3.36324	0.000770341	0.0233951
Tpr	ENSMUSG00000006005	protein_coding	108989	7690.21	-5.54558	1.59803	-3.47026	0.000519964	0.0185027
Dtnbp1	ENSMUSG00000057531	protein_coding	94245	964.851	-5.54859	1.60315	-3.46105	0.000538073	0.0187786
Plscr5	ENSMUSG00000095654	protein_coding	100504689	465.1	-5.56039	1.82673	-3.0439	0.00233534	0.0448122
Phf20l1	ENSMUSG00000072501	protein_coding	239510	4258.02	-5.56092	1.41294	-3.9357	8.29548e-05	0.00647722
Actn4	ENSMUSG00000054808	protein_coding	60595	1546.68	-5.56369	1.38662	-4.0124	6.01038e-05	0.00546068
Creb1	ENSMUSG00000025958	protein_coding	12912	2006.1	-5.56443	1.49661	-3.71803	0.000200779	0.0106593
Bzw2	ENSMUSG00000020547	protein_coding	66912	643.483	-5.56902	1.60779	-3.46377	0.000532652	0.0187235
A930007I19Rik	ENSMUSG00000097855	antisense	NA	830.615	-5.57672	1.76913	-3.15224	0.00162025	0.0365968
Ptprs	ENSMUSG00000013236	protein_coding	19280	535.007	-5.58037	1.76981	-3.15308	0.00161556	0.0365968
Malt1	ENSMUSG00000032688	protein_coding	240354	5242.32	-5.58782	1.78545	-3.12965	0.00175015	0.0384098
N4bp2l2	ENSMUSG00000029655	protein_coding	381695	5768.32	-5.59597	1.79655	-3.11484	0.00184044	0.039341
Hook1	ENSMUSG00000028572	protein_coding	77963	329.813	-5.60079	1.81614	-3.0839	0.00204309	0.0417632
Mbip	ENSMUSG00000021028	protein_coding	217588	970.425	-5.60778	1.12535	-4.98315	6.25569e-07	0.000252081
Nr1d2	ENSMUSG00000021775	protein_coding	353187	280.54	-5.6098	1.62284	-3.45678	0.000546678	0.0189573
Slc45a4	ENSMUSG00000079020	protein_coding	106068	593.358	-5.61227	1.86099	-3.01574	0.00256354	0.0473793
Cxxc5	ENSMUSG00000046668	protein_coding	67393	3261.77	-5.61493	1.30535	-4.30146	1.69675e-05	0.0026562
Olfr738	ENSMUSG00000094692	protein_coding	258662	178.014	-5.61543	1.79718	-3.12459	0.00178056	0.0387256
Zfp180	ENSMUSG00000057101	protein_coding	210135	1285.39	-5.61805	1.1028	-5.09434	3.49958e-07	0.000171731
Fam102a	ENSMUSG00000039157	protein_coding	98952	898.315	-5.63152	1.62582	-3.46381	0.000532585	0.0187235
Pank2	ENSMUSG00000037514	protein_coding	74450	1279.38	-5.63531	1.75321	-3.21428	0.00130774	0.0323302
Trib2	ENSMUSG00000020601	protein_coding	217410	229.682	-5.64215	1.53907	-3.66596	0.000246411	0.0119552
Ndufb8	ENSMUSG00000025204	protein_coding	67264	761.341	-5.65628	1.71608	-3.29605	0.000980536	0.026957
Pspc1	ENSMUSG00000021938	protein_coding	66645	4093.64	-5.67698	1.54317	-3.67879	0.000234347	0.0115241
Phtf1	ENSMUSG00000058388	protein_coding	18685	762.118	-5.68428	1.79438	-3.16782	0.00153585	0.0355344
Foxo3	ENSMUSG00000048756	protein_coding	56484	875.665	-5.69197	1.34855	-4.22082	2.43417e-05	0.00327973
Cpsf6	ENSMUSG00000055531	protein_coding	432508	2772.54	-5.69466	1.33397	-4.26897	1.9638e-05	0.00292686
Sh3bgrl2	ENSMUSG00000032261	protein_coding	212531	294.966	-5.73775	1.5962	-3.59463	0.000324848	0.0141849
Ctdspl2	ENSMUSG00000033411	protein_coding	329506	2908.92	-5.74691	1.54597	-3.71734	0.000201332	0.0106593
Kcnc1	ENSMUSG00000058975	protein_coding	16502	474.654	-5.74756	1.31218	-4.38017	1.18585e-05	0.00204795
Laptm5	ENSMUSG00000028581	protein_coding	16792	18563.5	-5.74828	1.70665	-3.36816	0.000756703	0.0231441
Lmbrd1	ENSMUSG00000073725	protein_coding	68421	2154.71	-5.76576	1.89718	-3.03913	0.00237266	0.0452688
Ssr1	ENSMUSG00000021427	protein_coding	107513	4853.82	-5.77702	1.83124	-3.15471	0.00160657	0.0365106
Atp6v0a1	ENSMUSG00000019302	protein_coding	11975	4026.32	-5.7793	1.9054	-3.03311	0.00242048	0.0458395
Letm1	ENSMUSG00000005299	protein_coding	56384	660.121	-5.78697	1.64621	-3.51533	0.000439212	0.0168707
Ppme1	ENSMUSG00000030718	protein_coding	72590	2590.22	-5.79791	1.60887	-3.60371	0.000313709	0.0140027
6720468P15Rik	ENSMUSG00000117655	lincRNA	NA	8475.91	-5.79879	1.34147	-4.32271	1.54124e-05	0.00246598
Azi2	ENSMUSG00000039285	protein_coding	27215	1476.65	-5.82314	1.55313	-3.74929	0.000177339	0.0099713
Lrch3	ENSMUSG00000022801	protein_coding	70144	2201.05	-5.82568	1.43232	-4.06729	4.75632e-05	0.00480909
Skil	ENSMUSG00000027660	protein_coding	20482	7520.92	-5.83413	1.81016	-3.22298	0.00126863	0.0317434
2610507B11Rik	ENSMUSG00000010277	protein_coding	72503	4110.4	-5.84292	1.93082	-3.02613	0.00247706	0.0463663
Gm26827	ENSMUSG00000097634	antisense	NA	7860.68	-5.85366	1.28671	-4.54934	5.38149e-06	0.00123549
Sacm1l	ENSMUSG00000025240	protein_coding	83493	2977.61	-5.85592	1.7162	-3.41214	0.000644547	0.0210749
Micu2	ENSMUSG00000021973	protein_coding	68514	2710.75	-5.87226	1.61061	-3.64599	0.000266364	0.0125729
Chsy1	ENSMUSG00000032640	protein_coding	269941	8030.95	-5.8774	1.28768	-4.56434	5.01071e-06	0.00118514
Zfp120	ENSMUSG00000068134	protein_coding	104348	722.279	-5.88539	1.96182	-2.99996	0.00270011	0.0488196
Rpn2	ENSMUSG00000027642	protein_coding	20014	2487.96	-5.90052	1.8867	-3.12743	0.00176342	0.0384618
Marchf6	ENSMUSG00000039100	protein_coding	223455	2977.45	-5.9108	1.34447	-4.39639	1.10068e-05	0.00193933
Tmem245	ENSMUSG00000055296	protein_coding	242474	1641.81	-5.91314	1.84625	-3.20277	0.00136111	0.0332048
Platr25	ENSMUSG00000074863	protein_coding	NA	759.164	-5.93148	1.6104	-3.68324	0.000230288	0.0114144
Etf1	ENSMUSG00000024360	protein_coding	225363	3869.46	-5.93185	1.89992	-3.12215	0.00179536	0.0389308
Ddx19b	ENSMUSG00000033658	protein_coding	234733	773.006	-5.93226	1.54151	-3.84835	0.000118916	0.00793366
Cul3	ENSMUSG00000004364	protein_coding	26554	7129.81	-5.95083	1.68318	-3.53546	0.000407064	0.0161342
1700105G05Rik	ENSMUSG00000113747	lincRNA	NA	912.049	-5.95548	1.59063	-3.7441	0.000181039	0.0100624
Tapt1	ENSMUSG00000046985	protein_coding	231225	950.385	-5.97999	1.67761	-3.56458	0.000364437	0.0152424
Zfp944	ENSMUSG00000033972	protein_coding	319615	775.467	-5.98099	1.92913	-3.10035	0.00193291	0.0404229
Cmtm8	ENSMUSG00000041012	protein_coding	70031	4513.92	-5.99467	1.51538	-3.95588	7.62538e-05	0.00621816
Sp1	ENSMUSG00000001280	protein_coding	20683	1832	-5.99889	1.66647	-3.59977	0.000318502	0.0140589
Ppp2r2a	ENSMUSG00000022052	protein_coding	71978	1811.46	-5.99967	1.54091	-3.89358	9.87764e-05	0.00714473
Ttc13	ENSMUSG00000037300	protein_coding	234875	1975.05	-6.00541	1.69191	-3.54949	0.000385978	0.0156988
Atad3a	ENSMUSG00000029036	protein_coding	108888	425.395	-6.01546	2.00882	-2.99452	0.00274874	0.0492284
D10Wsu102e	ENSMUSG00000020255	protein_coding	28109	340.224	-6.01553	1.35122	-4.45194	8.50982e-06	0.00168476
Tgfb1	ENSMUSG00000002603	protein_coding	21803	3155.96	-6.03003	1.69942	-3.54828	0.000387749	0.0157268
Speer1	ENSMUSG00000095829	protein_coding	70896	239.52	-6.03482	1.29981	-4.64283	3.43661e-06	0.000911959
Tecpr2	ENSMUSG00000021275	protein_coding	104859	836.679	-6.03946	1.43691	-4.20309	2.63292e-05	0.00348523
Pdcd4	ENSMUSG00000024975	protein_coding	18569	2434.33	-6.04781	1.79854	-3.36261	0.000772081	0.0234042
Msl1	ENSMUSG00000052915	protein_coding	74026	2574.26	-6.05224	1.54206	-3.92478	8.68088e-05	0.00660476
Elf1	ENSMUSG00000036461	protein_coding	13709	5930.3	-6.07994	1.60768	-3.7818	0.000155699	0.00920719
Glb1	ENSMUSG00000045594	protein_coding	12091	1350.88	-6.08195	1.45874	-4.16932	3.05515e-05	0.0037982
Tmem65	ENSMUSG00000062373	protein_coding	74868	457.081	-6.0825	1.9296	-3.1522	0.00162045	0.0365968
Gpbp1l1	ENSMUSG00000034042	protein_coding	77110	4296.66	-6.087	1.60971	-3.78143	0.000155931	0.00920778
Mapk1	ENSMUSG00000063358	protein_coding	26413	2783.9	-6.09113	1.4977	-4.06698	4.76268e-05	0.00480909
Dr1	ENSMUSG00000029265	protein_coding	13486	1075.44	-6.09212	1.9304	-3.15589	0.00160011	0.0364209
Gm26749	ENSMUSG00000097546	antisense	NA	3063.8	-6.09325	1.45411	-4.19036	2.78509e-05	0.00357543
Bri3bp	ENSMUSG00000037905	protein_coding	76809	404.375	-6.11232	1.40067	-4.36386	1.2779e-05	0.00214726
Lrriq3	ENSMUSG00000028182	protein_coding	74435	178.258	-6.11765	1.85743	-3.29361	0.000989102	0.0270728
Top2b	ENSMUSG00000017485	protein_coding	21974	11684	-6.13741	1.69614	-3.61845	0.00029637	0.0134214
Fbxo38	ENSMUSG00000042211	protein_coding	107035	1741.45	-6.13836	1.99728	-3.07337	0.00211658	0.0426057
Inka2	ENSMUSG00000048458	protein_coding	109050	6449.56	-6.13885	1.81857	-3.37564	0.00073644	0.0227789
Septin11	ENSMUSG00000058013	protein_coding	52398	8535.55	-6.13893	1.67186	-3.67193	0.00024073	0.0117738
Lmln	ENSMUSG00000022802	protein_coding	239833	324.929	-6.14173	1.85029	-3.31934	0.000902301	0.0257665
Zfc3h1	ENSMUSG00000034163	protein_coding	216345	5284.41	-6.1425	1.73391	-3.54256	0.000396256	0.0158986
Atp1b1	ENSMUSG00000026576	protein_coding	11931	1352.21	-6.16813	1.86366	-3.30969	0.000934007	0.0262076
Rac1	ENSMUSG00000001847	protein_coding	19353	4046.01	-6.18842	1.94918	-3.17489	0.00149895	0.035094
Mrps9	ENSMUSG00000060679	protein_coding	69527	1658.33	-6.20299	1.79576	-3.45424	0.000551851	0.0190759
Zranb1	ENSMUSG00000030967	protein_coding	360216	870.596	-6.20507	1.61525	-3.84156	0.000122255	0.00805997
Helz	ENSMUSG00000020721	protein_coding	78455	3348.87	-6.21452	1.22784	-5.06136	4.16273e-07	0.000186765
Cdk5rap1	ENSMUSG00000027487	protein_coding	66971	1026.63	-6.2319	1.97497	-3.15545	0.00160253	0.0364569
Ptpn7	ENSMUSG00000031506	protein_coding	320139	2195.97	-6.23268	1.60708	-3.87827	0.000105202	0.00732543
Inpp4a	ENSMUSG00000026113	protein_coding	269180	845.866	-6.24214	1.7427	-3.58188	0.000341127	0.0146553
Ccnl1	ENSMUSG00000027829	protein_coding	56706	2908.55	-6.24223	2.01224	-3.10212	0.00192138	0.0402787
Ptpn2	ENSMUSG00000024539	protein_coding	19255	1299.62	-6.24559	1.72538	-3.61982	0.000294803	0.0134023
Dmxl1	ENSMUSG00000037416	protein_coding	240283	3263.7	-6.24801	1.42467	-4.38557	1.1568e-05	0.00201376
1110046J04Rik	ENSMUSG00000085457	antisense	NA	810.067	-6.25461	1.98374	-3.15293	0.00161638	0.0365968
Rictor	ENSMUSG00000050310	protein_coding	78757	2447.33	-6.26377	1.64372	-3.81074	0.000138551	0.00872608
Mtfmt	ENSMUSG00000059183	protein_coding	69606	687.614	-6.29571	1.64279	-3.83233	0.000126934	0.0082471
Prpf38a	ENSMUSG00000063800	protein_coding	230596	464.572	-6.29615	1.4218	-4.42831	9.49764e-06	0.00175143
Ralgps1	ENSMUSG00000038831	protein_coding	241308	652.798	-6.29886	1.15325	-5.46181	4.71298e-08	3.72925e-05
Nmd3	ENSMUSG00000027787	protein_coding	97112	1984.39	-6.31298	2.07189	-3.04697	0.00231161	0.0445533
Gm20604	ENSMUSG00000041716	protein_coding	100859931	1574.65	-6.36062	1.44614	-4.39834	1.0908e-05	0.00192974
Tmprss11b	ENSMUSG00000035861	protein_coding	319875	128.079	-6.3657	2.05104	-3.10364	0.00191154	0.0402556
Wdr6	ENSMUSG00000066357	protein_coding	83669	285.081	-6.37227	1.48515	-4.29065	1.78147e-05	0.00272992
Shb	ENSMUSG00000044813	protein_coding	230126	519.292	-6.41281	1.87412	-3.42177	0.00062214	0.0205273
Rell1	ENSMUSG00000047881	protein_coding	100532	384.699	-6.42698	1.64237	-3.91324	9.10675e-05	0.00673631
Tmc4	ENSMUSG00000019734	protein_coding	353499	210.008	-6.43197	2.14648	-2.99652	0.00273082	0.0490559
Desi2	ENSMUSG00000026502	protein_coding	78825	3099.22	-6.4532	1.75218	-3.68296	0.000230544	0.0114144
Ipo5	ENSMUSG00000030662	protein_coding	70572	2683.22	-6.45757	2.06007	-3.13464	0.00172067	0.0381281
Pag1	ENSMUSG00000027508	protein_coding	94212	881.348	-6.46274	1.40138	-4.61169	3.99416e-06	0.000993289
Gdap2	ENSMUSG00000027865	protein_coding	14547	575.434	-6.46982	1.93181	-3.3491	0.000810751	0.024101
Sp3	ENSMUSG00000027109	protein_coding	20687	2319.79	-6.48566	1.7341	-3.74008	0.000183961	0.0101728
Terb1	ENSMUSG00000052616	protein_coding	320022	188.545	-6.48773	1.56965	-4.13322	3.57715e-05	0.00412938
Cmpk1	ENSMUSG00000028719	protein_coding	66588	2892.27	-6.49461	1.49132	-4.35495	1.33098e-05	0.00220244
Tax1bp1	ENSMUSG00000004535	protein_coding	52440	22741.3	-6.49846	1.88289	-3.45132	0.000557854	0.0192223
Dzip3	ENSMUSG00000064061	protein_coding	224170	626.039	-6.50292	1.62577	-3.99991	6.33675e-05	0.00566274
Arpc2	ENSMUSG00000006304	protein_coding	76709	6850.66	-6.55461	1.88518	-3.47692	0.000507218	0.01824
Fip1l1	ENSMUSG00000029227	protein_coding	66899	2937.99	-6.56045	1.13645	-5.77277	7.79807e-09	8.08029e-06
Slmap	ENSMUSG00000021870	protein_coding	83997	4744.93	-6.57753	1.17998	-5.57426	2.48591e-08	2.08052e-05
Ptbp3	ENSMUSG00000028382	protein_coding	230257	9643.47	-6.6035	1.79903	-3.67059	0.000241996	0.0117936
Gnai3	ENSMUSG00000000001	protein_coding	14679	2767.87	-6.60737	1.70634	-3.87225	0.000107835	0.00746103
4921524J17Rik	ENSMUSG00000036934	protein_coding	66714	786.585	-6.60777	1.72225	-3.8367	0.000124698	0.00814843
Cnot1	ENSMUSG00000036550	protein_coding	234594	5341.34	-6.61851	1.64801	-4.01606	5.91799e-05	0.00546068
Gm16062	ENSMUSG00000087249	antisense	NA	468.176	-6.63164	1.84137	-3.60147	0.000316423	0.0140526
Lix1l	ENSMUSG00000049288	protein_coding	280411	319.624	-6.63286	2.07388	-3.19828	0.0013825	0.0335883
Gm43311	ENSMUSG00000105896	TEC	NA	4896.9	-6.63845	1.40416	-4.72769	2.27084e-06	0.000666136
BC004004	ENSMUSG00000052712	protein_coding	80748	911.745	-6.65151	1.7611	-3.77691	0.000158786	0.00933413
Cenpe	ENSMUSG00000045328	protein_coding	229841	417.507	-6.66102	1.85561	-3.58967	0.000331103	0.0143952
Cdca7l	ENSMUSG00000021175	protein_coding	217946	950.871	-6.6659	1.61766	-4.12069	3.77733e-05	0.00422648
Atp7b	ENSMUSG00000006567	protein_coding	11979	121.58	-6.68253	1.98508	-3.36638	0.00076161	0.0232107
Pex7	ENSMUSG00000020003	protein_coding	18634	706.44	-6.69016	1.80242	-3.71177	0.000205817	0.0107895
Ip6k1	ENSMUSG00000032594	protein_coding	27399	1140.98	-6.70324	1.92482	-3.48253	0.000496695	0.0179685
Nup107	ENSMUSG00000052798	protein_coding	103468	889.232	-6.71523	1.6582	-4.04971	5.12808e-05	0.00499271
Ankib1	ENSMUSG00000040351	protein_coding	70797	3506.13	-6.71778	1.906	-3.52454	0.000424225	0.0165285
Recql	ENSMUSG00000030243	protein_coding	19691	1225.3	-6.72234	1.6385	-4.10273	4.08303e-05	0.00443126
Chd8	ENSMUSG00000053754	protein_coding	67772	2213.46	-6.73017	1.6852	-3.99369	6.50535e-05	0.00573103
Psmb7	ENSMUSG00000026750	protein_coding	19177	872.878	-6.77303	1.5759	-4.29788	1.72441e-05	0.00268983
Polr2g	ENSMUSG00000071662	protein_coding	67710	696.271	-6.79423	1.70313	-3.98926	6.628e-05	0.00580025
Ddx1	ENSMUSG00000037149	protein_coding	104721	1328.9	-6.80126	1.99451	-3.40998	0.00064967	0.0212105
Gm26692	ENSMUSG00000097035	lincRNA	NA	193.962	-6.80534	1.7427	-3.90505	9.42077e-05	0.00689062
Arid3b	ENSMUSG00000004661	protein_coding	56380	537.782	-6.81278	1.70935	-3.9856	6.731e-05	0.00580692
Fermt3	ENSMUSG00000024965	protein_coding	108101	2594.21	-6.82492	1.78013	-3.83395	0.000126104	0.00821561
Nsun3	ENSMUSG00000050312	protein_coding	106338	337.056	-6.83555	2.21956	-3.07968	0.00207223	0.0420273
Hspa4	ENSMUSG00000020361	protein_coding	15525	7138.79	-6.84703	1.93153	-3.54487	0.000392801	0.0158284
Cd38	ENSMUSG00000029084	protein_coding	12494	1808.77	-6.87987	1.7692	-3.88869	0.000100789	0.00717893
Kif21b	ENSMUSG00000041642	protein_coding	16565	2441.54	-6.88862	1.67803	-4.10518	4.03995e-05	0.00439546
Trub1	ENSMUSG00000025086	protein_coding	72133	8079.27	-6.90703	1.74169	-3.96571	7.31776e-05	0.00607634
Kat7	ENSMUSG00000038909	protein_coding	217127	2478.51	-6.91835	1.9001	-3.64105	0.000271528	0.0127232
Lyz1	ENSMUSG00000069515	protein_coding	17110	8112.44	-6.92234	1.9627	-3.52694	0.000420391	0.0164527
Hsd17b4	ENSMUSG00000024507	protein_coding	15488	1370.38	-6.93148	2.04856	-3.38359	0.000715456	0.0224813
Avl9	ENSMUSG00000029787	protein_coding	78937	1221.95	-6.93338	2.20186	-3.14887	0.00163903	0.0368738
Kcnk5	ENSMUSG00000023243	protein_coding	16529	2217.93	-6.9409	1.77069	-3.91988	8.85927e-05	0.00669367
Bclaf1	ENSMUSG00000037608	protein_coding	72567	6153.5	-6.94937	1.90691	-3.64431	0.000268114	0.0126144
Gfm1	ENSMUSG00000027774	protein_coding	28030	1120.3	-6.95959	1.56807	-4.43833	9.06603e-06	0.00169171
Hnrnpk	ENSMUSG00000021546	protein_coding	15387	7197.8	-6.98753	2.10958	-3.31228	0.000925377	0.0260832
Far1os	ENSMUSG00000084984	antisense	NA	5194.34	-7.01629	1.98339	-3.53752	0.000403905	0.0160946
Naa50	ENSMUSG00000022698	protein_coding	72117	4677.78	-7.06676	1.50779	-4.68682	2.77482e-06	0.000764306
Nap1l1	ENSMUSG00000058799	protein_coding	53605	2844.2	-7.07726	2.00644	-3.52727	0.000419875	0.0164473
Dram2	ENSMUSG00000027900	protein_coding	67171	1926.54	-7.10561	2.09638	-3.38947	0.000700284	0.0221969
Phf3	ENSMUSG00000048874	protein_coding	213109	3061.78	-7.11083	1.58272	-4.49279	7.02974e-06	0.00145683
Zfp58	ENSMUSG00000071291	protein_coding	238693	1419.69	-7.14109	1.63754	-4.36087	1.29548e-05	0.00216013
Setdb1	ENSMUSG00000015697	protein_coding	84505	593.481	-7.15017	2.06416	-3.46397	0.000532271	0.0187235
Nsd1	ENSMUSG00000021488	protein_coding	18193	7883.32	-7.16384	1.5314	-4.67798	2.89712e-06	0.000788549
Ankrd16	ENSMUSG00000047909	protein_coding	320816	1013.66	-7.16875	1.74565	-4.10663	4.01478e-05	0.00439003
Rps3a1	ENSMUSG00000028081	protein_coding	20091	17105.7	-7.17179	2.08345	-3.44227	0.000576861	0.0196594
Ncan	ENSMUSG00000002341	protein_coding	13004	146.045	-7.17526	1.8802	-3.81623	0.000135508	0.00861247
6430590A07Rik	ENSMUSG00000097583	processed_transcript	NA	473.211	-7.18217	2.04651	-3.50948	0.000448986	0.0171257
Mier1	ENSMUSG00000028522	protein_coding	71148	6209.31	-7.18409	1.83866	-3.90724	9.33565e-05	0.00683985
Zc3h13	ENSMUSG00000022000	protein_coding	67302	3932.64	-7.19131	1.77667	-4.04764	5.17376e-05	0.00500105
Pbrm1	ENSMUSG00000042323	protein_coding	66923	3423.87	-7.19346	1.54651	-4.6514	3.29684e-06	0.000880235
Dync1h1	ENSMUSG00000018707	protein_coding	13424	2147.66	-7.1941	1.59783	-4.50242	6.71855e-06	0.00141903
Usp47	ENSMUSG00000059263	protein_coding	74996	4086.48	-7.20909	2.01998	-3.5689	0.000358483	0.0151028
Zfp451	ENSMUSG00000042197	protein_coding	98403	2013.7	-7.23131	2.07585	-3.48354	0.000494828	0.0179573
Sgpp1	ENSMUSG00000021054	protein_coding	81535	743.661	-7.2339	1.62801	-4.44339	8.85518e-06	0.00169171
Naa15	ENSMUSG00000063273	protein_coding	74838	5376.41	-7.26482	2.088	-3.47932	0.00050268	0.0181248
Akap9	ENSMUSG00000040407	protein_coding	100986	3429.06	-7.26821	1.22098	-5.95276	2.63657e-09	3.18732e-06
Gm44686	ENSMUSG00000108563	antisense	NA	7270.14	-7.32282	1.61521	-4.53366	5.79713e-06	0.00130047
Man1b1	ENSMUSG00000036646	protein_coding	227619	270.623	-7.40623	1.86503	-3.97111	7.15392e-05	0.00602202
Erlec1	ENSMUSG00000020311	protein_coding	66753	1020.89	-7.43213	1.67515	-4.4367	9.13492e-06	0.00169171
Ppp3cc	ENSMUSG00000022092	protein_coding	19057	7196.24	-7.4725	1.46143	-5.11316	3.16821e-07	0.000163363
Stx19	ENSMUSG00000047854	protein_coding	68159	309.31	-7.47524	1.59003	-4.70134	2.58466e-06	0.000725705
Ern1	ENSMUSG00000020715	protein_coding	78943	3425.84	-7.47845	1.70394	-4.3889	1.13924e-05	0.00199115
Cs	ENSMUSG00000005683	protein_coding	12974	2179.74	-7.47857	1.91067	-3.91411	9.074e-05	0.00673631
Dgkz	ENSMUSG00000040479	protein_coding	104418	1529.49	-7.49527	1.7988	-4.16681	3.08892e-05	0.00381903
Clstn1	ENSMUSG00000039953	protein_coding	65945	563.929	-7.51575	1.57647	-4.76745	1.86577e-06	0.000596949
Zbed4	ENSMUSG00000034333	protein_coding	223773	1121.88	-7.52076	1.58259	-4.7522	2.01219e-06	0.000625814
Hdgfl3	ENSMUSG00000025104	protein_coding	29877	1493.23	-7.55058	1.98828	-3.79754	0.00014614	0.00895778
Rbbp6	ENSMUSG00000030779	protein_coding	19647	2822.84	-7.55577	2.0491	-3.68737	0.000226588	0.0113022
Ccdc82	ENSMUSG00000079084	protein_coding	66396	2753.14	-7.58132	1.68219	-4.5068	6.58113e-06	0.00139713
Castor2	ENSMUSG00000015944	protein_coding	80909	711.74	-7.67393	1.68629	-4.55079	5.34459e-06	0.00123549
Gm7536	ENSMUSG00000057036	processed_pseudogene	NA	2600.44	-7.68856	2.56119	-3.00195	0.00268254	0.048747
1700069L16Rik	ENSMUSG00000042184	protein_coding	NA	3425.56	-7.73773	1.5043	-5.14373	2.6934e-07	0.000144712
Gm47200	ENSMUSG00000112426	antisense	NA	201.767	-7.74771	1.63072	-4.7511	2.02313e-06	0.000625814
Hook3	ENSMUSG00000037234	protein_coding	320191	2844.5	-7.78925	1.42811	-5.45423	4.91863e-08	3.80885e-05
Ythdf2	ENSMUSG00000040025	protein_coding	213541	820.92	-7.8547	2.09022	-3.75784	0.000171387	0.0097884
Gm33962	ENSMUSG00000098137	transcribed_unprocessed_pseudogene	NA	125.09	-7.88161	2.38555	-3.30389	0.000953521	0.0265023
Rps12-ps9	ENSMUSG00000069862	processed_pseudogene	NA	977.946	-7.93895	2.11539	-3.75294	0.000174771	0.00990368
Golga3	ENSMUSG00000029502	protein_coding	269682	3085.47	-7.94092	1.37258	-5.78541	7.23372e-09	7.67833e-06
Ric1	ENSMUSG00000038658	protein_coding	226089	4855.93	-7.94096	1.71486	-4.63068	3.64475e-06	0.000944163
Dnaja2	ENSMUSG00000031701	protein_coding	56445	4166.26	-8.16829	2.07161	-3.94297	8.04798e-05	0.00636147
Chmp1a	ENSMUSG00000000743	protein_coding	234852	1207.38	-8.16944	2.07631	-3.93458	8.33406e-05	0.00648834
Kmt2a	ENSMUSG00000002028	protein_coding	214162	2672.45	-8.23828	2.09862	-3.92558	8.65216e-05	0.00659443
Gclm	ENSMUSG00000028124	protein_coding	14630	423.227	-8.25004	1.92523	-4.28522	1.82557e-05	0.00277793
Tmem243	ENSMUSG00000079659	protein_coding	652925	4371.98	-8.28105	1.7353	-4.77211	1.82305e-06	0.000592083
Gm9616	ENSMUSG00000114003	processed_pseudogene	NA	4532.67	-8.32126	2.62216	-3.17344	0.00150646	0.0351662
Mir3071	ENSMUSG00000070129	miRNA	NA	658.137	-8.33299	1.35893	-6.13203	8.67634e-10	1.14423e-06
Msh4	ENSMUSG00000005493	protein_coding	55993	103.702	-8.3463	2.06798	-4.03597	5.43769e-05	0.00515573
Fyttd1	ENSMUSG00000022800	protein_coding	69823	1458.52	-8.43113	1.78354	-4.72718	2.27655e-06	0.000666136
Stard10	ENSMUSG00000030688	protein_coding	56018	707.788	-8.43159	1.43743	-5.86575	4.47096e-09	4.98913e-06
Rwdd3	ENSMUSG00000028133	protein_coding	66568	328.02	-8.46491	1.90521	-4.44303	8.87002e-06	0.00169171
Gm5577	ENSMUSG00000084950	antisense	NA	1518.8	-8.53357	1.87233	-4.55771	5.17133e-06	0.00120351
Dmtf1	ENSMUSG00000042508	protein_coding	23857	4241.28	-8.59604	1.8403	-4.671	2.99743e-06	0.000810237
Cenpu	ENSMUSG00000031629	protein_coding	71876	1286.17	-8.64463	1.88398	-4.58849	4.46468e-06	0.00107946
Prkacb	ENSMUSG00000005034	protein_coding	18749	5429.71	-8.74703	1.75411	-4.98658	6.14576e-07	0.000249966
Gm43401	ENSMUSG00000105391	antisense	NA	77.5711	-8.86494	2.39034	-3.70865	0.00020837	0.0108057
Rorc	ENSMUSG00000028150	protein_coding	19885	102.956	-8.87097	2.11555	-4.19323	2.7501e-05	0.00354096
Vac14	ENSMUSG00000010936	protein_coding	234729	1442.78	-8.88341	1.92451	-4.61593	3.91334e-06	0.000986648
Copb1	ENSMUSG00000030754	protein_coding	70349	3344.82	-8.95312	1.84254	-4.85911	1.17913e-06	0.000413835
C9orf72	ENSMUSG00000028300	protein_coding	73205	1246.06	-8.95866	1.75784	-5.0964	3.46166e-07	0.000171731
H6pd	ENSMUSG00000028980	protein_coding	100198	429.262	-8.99592	1.62579	-5.53327	3.14312e-08	2.58091e-05
Zfp960	ENSMUSG00000096696	protein_coding	449000	106.04	-9.02744	1.7718	-5.09506	3.48638e-07	0.000171731
Prdx1	ENSMUSG00000028691	protein_coding	18477	3909.68	-9.06238	1.68255	-5.3861	7.20036e-08	5.22266e-05
Ddx39	ENSMUSG00000005481	protein_coding	68278	937.505	-9.29968	1.56178	-5.95454	2.60803e-09	3.18732e-06
Ctnnd1	ENSMUSG00000034101	protein_coding	12388	1072.28	-9.4073	1.62303	-5.79613	6.78608e-09	7.38325e-06
C230034O21Rik	ENSMUSG00000086181	antisense	NA	69.8957	-9.51387	2.56014	-3.71615	0.000202283	0.0106837
Bag3	ENSMUSG00000030847	protein_coding	29810	159.057	-9.61701	1.80172	-5.33767	9.41498e-08	6.31002e-05
Mras	ENSMUSG00000032470	protein_coding	17532	204.369	-9.64197	1.82614	-5.27998	1.292e-07	8.14896e-05
Lrrc1	ENSMUSG00000032352	protein_coding	214345	1915.89	-9.81379	1.93698	-5.06653	4.05132e-07	0.000185593
Ncf4	ENSMUSG00000071715	protein_coding	17972	3008.26	-9.81436	2.80352	-3.50072	0.000463995	0.0173778
Clec18a	ENSMUSG00000033633	protein_coding	353287	127.768	-9.81601	2.26958	-4.32504	1.52505e-05	0.00244908
Edem3	ENSMUSG00000043019	protein_coding	66967	1740.38	-9.87143	1.54414	-6.39281	1.62862e-10	2.95323e-07
Sumo2	ENSMUSG00000020738	protein_coding	170930	667.035	-10.1903	3.09254	-3.29511	0.000983823	0.0269962
Samhd1	ENSMUSG00000027639	protein_coding	56045	1678.33	-10.5204	1.55507	-6.76523	1.331e-11	3.62032e-08
Gm34923	ENSMUSG00000113343	lincRNA	NA	138.179	-10.5819	2.10895	-5.01764	5.23109e-07	0.000216816
Etfb	ENSMUSG00000004610	protein_coding	110826	262.806	-12.5518	2.31764	-5.41578	6.10228e-08	4.57881e-05
Tmod3	ENSMUSG00000058587	protein_coding	50875	2242.73	-13.2319	1.68999	-7.82957	4.8953e-15	2.13043e-11
					-3334.99

## Sheet: Sup.Table 2 A DkkMoDRBvsDRB DEg
mgi_symbol	ensembl_gene_id	gene_biotype	entrezgene_id	baseMean.x	log2FoldChange.x	lfcSE.x	stat.x	pvalue.x	padj.x
Gm8132	ENSMUSG00000108186	processed_pseudogene	NA	86.5137	9.37779	2.17418	4.31326	1.60864e-05	0.000318364
Gm26574	ENSMUSG00000097925	antisense	NA	345.849	8.62841	1.59562	5.40756	6.38879e-08	3.02218e-06
Fgf23	ENSMUSG00000000182	protein_coding	64654	521.077	8.37228	1.56542	5.34826	8.88024e-08	3.96785e-06
Gm43322	ENSMUSG00000105939	TEC	NA	99.0198	8.26475	2.43305	3.39687	0.000681617	0.00697976
Krt19	ENSMUSG00000020911	protein_coding	16669	65.0331	8.19812	2.60079	3.15216	0.00162065	0.0139031
Sh2d7	ENSMUSG00000046460	protein_coding	244885	82.2255	7.49999	2.25059	3.33245	0.000860836	0.00841879
Pou3f3	ENSMUSG00000045515	protein_coding	18993	444.798	7.2296	1.31074	5.51566	3.47471e-08	1.81701e-06
Gm49898	ENSMUSG00000117282	lincRNA	NA	204.83	6.7075	1.26653	5.29598	1.1838e-07	5.1009e-06
Gm10605	ENSMUSG00000097974	lincRNA	NA	132.288	6.4558	2.10054	3.0734	0.00211633	0.0170561
Elovl2	ENSMUSG00000021364	protein_coding	54326	274.903	6.25211	1.35272	4.62187	3.80304e-06	9.30867e-05
Gm34121	ENSMUSG00000108659	processed_transcript	NA	214.426	6.14057	1.87114	3.28172	0.00103176	0.00972325
Rnf183	ENSMUSG00000063851	protein_coding	76072	114.803	6.08746	1.85412	3.28321	0.00102631	0.00967612
Gm49191	ENSMUSG00000115560	antisense	NA	301.953	6.07094	1.33884	4.53447	5.77481e-06	0.000132204
Cyp2b23	ENSMUSG00000040650	protein_coding	243881	98.0171	5.89135	1.63359	3.60639	0.000310491	0.003684
Gm3443	ENSMUSG00000079382	transcribed_unitary_pseudogene	NA	197.048	5.85132	1.77898	3.28915	0.00100489	0.00952049
Gm14244	ENSMUSG00000087162	antisense	NA	1656.1	5.81577	0.883048	6.58602	4.5177e-11	7.04697e-09
Extl2	ENSMUSG00000027963	protein_coding	58193	134.244	5.81305	1.82101	3.19221	0.0014119	0.0124637
Olfr971	ENSMUSG00000093934	protein_coding	258607	281.927	5.70771	1.36039	4.19563	2.72114e-05	0.000492719
Vmn1r-ps144	ENSMUSG00000067949	transcribed_unprocessed_pseudogene	NA	1502.84	5.68811	1.22944	4.62657	3.71765e-06	9.16669e-05
Calr3	ENSMUSG00000019732	protein_coding	73316	632.417	5.53187	1.57268	3.51749	0.000435652	0.00485645
4930573H18Rik	ENSMUSG00000104766	antisense	NA	726.912	5.37304	1.46395	3.67024	0.00024232	0.00302171
Olfr1380	ENSMUSG00000107645	protein_coding	404336	565.44	5.35339	1.05084	5.0944	3.49848e-07	1.28593e-05
Gm15208	ENSMUSG00000086975	lincRNA	NA	581.546	5.32334	1.02264	5.20551	1.93465e-07	7.73859e-06
Gm45903	ENSMUSG00000110640	lincRNA	NA	246.048	5.23156	1.9711	2.65413	0.00795141	0.0465996
Card10	ENSMUSG00000033170	protein_coding	105844	274.606	5.1703	1.95111	2.64992	0.00805097	0.0470559
Tmem9	ENSMUSG00000026411	protein_coding	66241	538.672	5.02202	1.068	4.70229	2.5726e-06	6.77722e-05
Gm48021	ENSMUSG00000112752	lincRNA	NA	139.258	4.94582	1.76751	2.79819	0.00513897	0.0336762
Gm47459	ENSMUSG00000112674	lincRNA	NA	78.9219	4.92331	1.68989	2.91339	0.00357533	0.0254787
Myh7b	ENSMUSG00000074652	protein_coding	668940	989.514	4.9013	1.31085	3.73903	0.000184728	0.00242179
Gm35392	ENSMUSG00000109748	lincRNA	NA	101.506	4.88934	1.2806	3.81802	0.000134528	0.00185744
Fbxw25	ENSMUSG00000094992	protein_coding	546160	784.676	4.84182	1.10242	4.39199	1.12318e-05	0.000232323
Olfr532	ENSMUSG00000063823	protein_coding	259028	575.607	4.63876	0.847206	5.47536	4.3662e-08	2.1816e-06
Cplx2	ENSMUSG00000025867	protein_coding	12890	262.318	4.48479	1.30021	3.44929	0.000562056	0.00600556
A130030D18Rik	ENSMUSG00000087061	lincRNA	NA	1203.13	4.39303	0.84507	5.19843	2.00983e-07	7.99525e-06
Gm26834	ENSMUSG00000097307	lincRNA	NA	473.156	4.3874	1.14945	3.81697	0.000135101	0.00186359
4930447F24Rik	ENSMUSG00000102224	processed_transcript	NA	67.7202	4.37838	1.36983	3.1963	0.00139204	0.0123396
Aph1b	ENSMUSG00000032375	protein_coding	208117	246.859	4.36681	1.60315	2.72389	0.00645179	0.0397202
Gm31819	ENSMUSG00000117984	lincRNA	NA	328.788	4.35497	1.60929	2.70615	0.00680692	0.0414144
Gm11184	ENSMUSG00000087592	lincRNA	NA	57.3817	4.28836	1.35284	3.1699	0.00152493	0.0132492
Gm26644	ENSMUSG00000097683	lincRNA	NA	811.295	4.12626	1.26869	3.25238	0.00114444	0.0105745
Kcng1	ENSMUSG00000074575	protein_coding	241794	1200.28	4.11062	1.02215	4.02156	5.78144e-05	0.000927128
4930471D02Rik	ENSMUSG00000097689	lincRNA	NA	163.743	4.08582	1.3916	2.93607	0.00332404	0.0240743
Gm7319	ENSMUSG00000109932	processed_pseudogene	NA	248.186	4.06211	0.886853	4.58036	4.64179e-06	0.000110208
Gm43020	ENSMUSG00000104846	lincRNA	NA	59.2177	4.05698	1.27235	3.18857	0.0014298	0.0125707
Olfr1186	ENSMUSG00000082882	protein_coding	258523	185.612	4.01502	1.44137	2.78556	0.00534348	0.0347035
Txndc15	ENSMUSG00000021497	protein_coding	69672	632.253	4.01481	1.46169	2.7467	0.00601987	0.0378153
Gm10046	ENSMUSG00000109143	transcribed_unprocessed_pseudogene	NA	955.515	3.98985	1.00179	3.98271	6.81344e-05	0.00105787
Gm31107	ENSMUSG00000114621	lincRNA	NA	50.9544	3.97232	1.29684	3.06309	0.00219065	0.0174867
Olfr905	ENSMUSG00000096794	protein_coding	258800	1370.96	3.93959	0.979601	4.02163	5.7798e-05	0.000927128
Gcm1	ENSMUSG00000023333	protein_coding	14531	86.2776	3.93567	1.45964	2.69633	0.00701079	0.0423469
Faddos	ENSMUSG00000073778	antisense	NA	1729.23	3.90046	0.582276	6.69864	2.10362e-11	3.69151e-09
1700019N19Rik	ENSMUSG00000026931	protein_coding	67507	74.8858	3.83046	1.21407	3.15505	0.00160469	0.0137934
Tie1	ENSMUSG00000033191	protein_coding	21846	532.235	3.78055	1.42808	2.6473	0.0081137	0.0472892
Gm34342	ENSMUSG00000102158	lincRNA	NA	1126.02	3.73364	1.41861	2.6319	0.00849099	0.048847
Alox12b	ENSMUSG00000032807	protein_coding	11686	1589.29	3.63051	0.731724	4.96158	6.99215e-07	2.24907e-05
Vmn1r2	ENSMUSG00000115072	protein_coding	100312470	1854.78	3.6237	1.23945	2.92363	0.00345975	0.0248791
Lag3	ENSMUSG00000030124	protein_coding	16768	163.493	3.59016	1.31696	2.7261	0.00640874	0.03952
D830044D21Rik	ENSMUSG00000046005	lincRNA	NA	253.705	3.58974	1.16648	3.07742	0.00208802	0.0169073
H2-T10	ENSMUSG00000079491	polymorphic_pseudogene	NA	572.716	3.56073	1.08038	3.29581	0.000981377	0.00934563
Gprc6a	ENSMUSG00000019905	protein_coding	210198	2182.12	3.53931	0.720024	4.91555	8.85354e-07	2.76205e-05
Gm45820	ENSMUSG00000110433	antisense	NA	624.56	3.49832	1.27379	2.74638	0.00602575	0.0378457
H2-T-ps	ENSMUSG00000073405	unprocessed_pseudogene	667803	604.88	3.48852	1.07444	3.24684	0.00116695	0.0107505
Olfr6	ENSMUSG00000036647	protein_coding	233670	330.469	3.48414	1.20439	2.89286	0.00381747	0.0268027
Col9a2	ENSMUSG00000028626	protein_coding	12840	788.1	3.4789	0.689319	5.04687	4.49113e-07	1.5839e-05
Zfp9	ENSMUSG00000072623	protein_coding	22750	584.04	3.41474	0.796968	4.28467	1.8301e-05	0.000354791
Ccdc65	ENSMUSG00000003354	protein_coding	105833	2366.64	3.40251	0.809868	4.20131	2.65373e-05	0.000483628
Gm33756	ENSMUSG00000110210	lincRNA	NA	267.203	3.36193	1.05897	3.17473	0.00149976	0.0130879
Gm12709	ENSMUSG00000085181	antisense	NA	300.637	3.34047	0.888649	3.75904	0.000170565	0.00226449
Gm12569	ENSMUSG00000061469	protein_coding	622699	1907.09	3.30541	0.833088	3.96766	7.25829e-05	0.0011154
Naip3-ps1	ENSMUSG00000114576	unprocessed_pseudogene	NA	673.706	3.298	1.11527	2.95714	0.00310508	0.0228962
Tradd	ENSMUSG00000031887	protein_coding	71609	1252.09	3.29558	1.04395	3.15683	0.00159494	0.0137259
Vmn2r45	ENSMUSG00000090662	protein_coding	100042810	1631.5	3.28761	0.872175	3.76944	0.000163613	0.00218376
Olfr1179	ENSMUSG00000075127	protein_coding	258919	660.382	3.27794	1.06106	3.0893	0.00200629	0.0164438
Mab21l3	ENSMUSG00000044313	protein_coding	242125	1483.18	3.27599	1.1233	2.91639	0.0035411	0.0253094
Gm25956	ENSMUSG00000092856	miRNA	NA	191.517	3.25286	1.00885	3.22432	0.00126272	0.0114137
Gm44899	ENSMUSG00000109008	lincRNA	NA	1462.93	3.25166	1.11806	2.9083	0.00363404	0.0258336
Cyp2j12	ENSMUSG00000081225	protein_coding	242546	3071.88	3.25021	0.790623	4.11094	3.94047e-05	0.00067277
Svop	ENSMUSG00000042078	protein_coding	68666	1601.17	3.24517	0.845299	3.83909	0.000123493	0.00173033
Gas2l2	ENSMUSG00000020686	protein_coding	237891	400.294	3.24228	1.04956	3.08918	0.0020071	0.0164447
Cyp2j14-ps	ENSMUSG00000082119	unprocessed_pseudogene	NA	776.196	3.19397	0.665238	4.80125	1.57677e-06	4.4559e-05
H2-DMb1	ENSMUSG00000079547	protein_coding	14999	163.671	3.15126	1.01502	3.10462	0.00190526	0.0157847
Cckbr	ENSMUSG00000030898	protein_coding	12426	1601.38	3.14265	1.04678	3.00222	0.00268019	0.0204743
Pou2f3	ENSMUSG00000032015	protein_coding	18988	2231.24	3.11761	0.787205	3.96035	7.48385e-05	0.00114682
Sox5os2	ENSMUSG00000087157	antisense	NA	1521.7	3.11682	0.934175	3.33644	0.000848583	0.00832702
C87487	ENSMUSG00000117026	lincRNA	NA	1010.95	3.09574	1.06663	2.90236	0.00370366	0.0262257
Gm10743	ENSMUSG00000112757	TEC	NA	1583.87	3.09382	0.918029	3.37007	0.00075149	0.00756181
Vmn2r-ps120	ENSMUSG00000093776	unprocessed_pseudogene	NA	2568.44	3.06259	0.862761	3.54976	0.000385589	0.00439519
Aifm3	ENSMUSG00000022763	protein_coding	72168	329.09	3.0499	1.13606	2.68462	0.00726121	0.0435512
Timd4	ENSMUSG00000055546	protein_coding	276891	1978.62	3.04024	1.02802	2.95738	0.0031027	0.0228864
Aif1l	ENSMUSG00000001864	protein_coding	108897	403.666	3.0264	1.08941	2.77802	0.0054692	0.035283
Gm13860	ENSMUSG00000085187	lincRNA	NA	2312.59	3.02364	0.916204	3.30018	0.000966226	0.00924382
Gm48433	ENSMUSG00000114209	lincRNA	NA	2902.3	2.99803	0.741716	4.04202	5.29934e-05	0.000861836
Wnt3a	ENSMUSG00000009900	protein_coding	22416	918.705	2.98858	0.778573	3.83854	0.000123769	0.00173364
Gm30978	ENSMUSG00000110110	lincRNA	NA	404.737	2.89645	0.812364	3.56546	0.000363222	0.00418851
Chil6	ENSMUSG00000027902	protein_coding	229688	2087.3	2.87947	0.832341	3.45948	0.000541227	0.00582448
Synpo	ENSMUSG00000043079	protein_coding	104027	906.05	2.84849	0.511548	5.56837	2.57128e-08	1.4058e-06
Gm49304	ENSMUSG00000115403	lincRNA	NA	826.324	2.84133	0.836806	3.39545	0.000685158	0.00700612
Gm50294	ENSMUSG00000117913	lincRNA	NA	387.052	2.81457	0.999032	2.8173	0.00484298	0.0322042
Tmem63c	ENSMUSG00000034145	protein_coding	217733	1572.31	2.80173	0.483747	5.79173	6.96657e-09	4.76706e-07
1700031A10Rik	ENSMUSG00000092239	antisense	NA	1479.28	2.78344	1.05794	2.63099	0.00851377	0.0489383
Gm6284	ENSMUSG00000109991	processed_pseudogene	NA	275.035	2.77906	0.797949	3.48276	0.000496277	0.0054239
Ubxn8	ENSMUSG00000052906	protein_coding	108159	3916.66	2.75332	0.72553	3.79491	0.000147696	0.00200366
Gm44439	ENSMUSG00000107804	TEC	NA	1953.68	2.74976	0.894287	3.0748	0.00210642	0.0169982
Gm39147	ENSMUSG00000110172	transcribed_processed_pseudogene	105243147	407.646	2.74124	0.731576	3.74704	0.000178935	0.00235621
Celsr3	ENSMUSG00000023473	protein_coding	107934	246.788	2.73749	0.937089	2.92127	0.00348607	0.0250064
Mir134	ENSMUSG00000065426	miRNA	NA	1264.41	2.72841	0.998609	2.73221	0.00629109	0.0389956
1700037F03Rik	ENSMUSG00000114125	antisense	NA	588.743	2.72807	1.02783	2.6542	0.0079496	0.0465996
Syt3	ENSMUSG00000030731	protein_coding	20981	964.277	2.67126	0.996832	2.67975	0.00736767	0.0439716
Aarsd1	ENSMUSG00000075528	protein_coding	69684	999.317	2.64658	0.98537	2.68587	0.00723406	0.0434363
Olfml1	ENSMUSG00000051041	protein_coding	244198	1442.84	2.64318	0.971517	2.72068	0.00651484	0.0400573
Fbxw27	ENSMUSG00000104614	protein_coding	76998	1051.26	2.63487	0.726623	3.62619	0.000287636	0.00346949
1700061N14Rik	ENSMUSG00000110464	lincRNA	NA	964.025	2.60647	0.725523	3.59254	0.000327464	0.00384649
Gm43099	ENSMUSG00000105358	TEC	NA	247.512	2.56986	0.718686	3.57578	0.000349191	0.00406332
Gm38554	ENSMUSG00000107063	lincRNA	NA	2464.2	2.5354	0.924079	2.7437	0.00607502	0.0380464
Trim36	ENSMUSG00000033949	protein_coding	28105	2634.28	2.50279	0.692664	3.61328	0.000302346	0.00360594
Gm44433	ENSMUSG00000107512	TEC	NA	5522.04	2.50013	0.625606	3.99633	6.43316e-05	0.00101182
2410003L11Rik	ENSMUSG00000085860	processed_transcript	NA	1642.08	2.4953	0.946803	2.63549	0.00840148	0.0484988
Myl1	ENSMUSG00000061816	protein_coding	17901	5869.33	2.49476	0.639208	3.90289	9.50511e-05	0.00140141
C430042M11Rik	ENSMUSG00000097254	lincRNA	NA	466.887	2.4943	0.945264	2.63874	0.00832158	0.0481269
Scn4a	ENSMUSG00000001027	protein_coding	110880	929.32	2.47912	0.860281	2.88176	0.00395467	0.0274581
Pgpep1l	ENSMUSG00000030553	protein_coding	78444	1793.88	2.47603	0.64776	3.82245	0.000132131	0.00183306
Gm6866	ENSMUSG00000101196	transcribed_unprocessed_pseudogene	628304	2730.08	2.46012	0.830784	2.9612	0.00306443	0.0226655
Gm13972	ENSMUSG00000084785	processed_transcript	NA	2919.19	2.45704	0.542503	4.52908	5.92423e-06	0.000135127
Itgad	ENSMUSG00000070369	protein_coding	381924	3612.61	2.45293	0.615702	3.98395	6.77781e-05	0.00105436
Sdc3	ENSMUSG00000025743	protein_coding	20970	1914.82	2.4294	0.615734	3.94554	7.96216e-05	0.00120989
Srms	ENSMUSG00000027579	protein_coding	20811	1425.37	2.42588	0.895627	2.70858	0.00675718	0.0411751
Mall	ENSMUSG00000027377	protein_coding	228576	1528.19	2.42411	0.915047	2.64916	0.00806917	0.0471014
Zfp641	ENSMUSG00000022987	protein_coding	239652	1956.73	2.39515	0.854765	2.80211	0.00507694	0.0333658
Gm48301	ENSMUSG00000114112	lincRNA	NA	3205.58	2.39107	0.679535	3.51868	0.000433698	0.0048359
Asic4	ENSMUSG00000033007	protein_coding	241118	1073.18	2.34268	0.635331	3.68733	0.000226616	0.00286612
Sh3yl1	ENSMUSG00000020669	protein_coding	24057	1793.39	2.33133	0.852476	2.73477	0.00624237	0.0387654
Pdlim1	ENSMUSG00000055044	protein_coding	54132	2318.66	2.30563	0.7677	3.0033	0.00267073	0.0204379
9130015L21Rik	ENSMUSG00000086653	lincRNA	NA	819.961	2.28977	0.686	3.33786	0.000844253	0.00829388
[truncated: 1,716 more rows]
